# Supplementary material
Source: publisher figshare collection journal article supplement (https://acs.figshare.com/ndownloader/files/5539007)
Supplement: Supplementary file 1 [file 5539007]

data_Compound_4
_audit_creation_date              2015-05-30
_audit_creation_method
;
Olex2 1.2
(compiled 2015.01.26 svn.r3150 for OlexSys, GUI svn.r4998)
;
_publ_contact_author_address      ?
_publ_contact_author_email        ?
_publ_contact_author_name         ''
_publ_contact_author_phone        ?
_publ_section_references
;
Dolomanov, O.V., Bourhis, L.J., Gildea, R.J, Howard, J.A.K. & Puschmann, H.
 (2009), J. Appl. Cryst. 42, 339-341.

Sheldrick, G.M. (2008). Acta Cryst. A64, 112-122.

Sheldrick, G.M. (2015). Acta Cryst. A71, 3-8.
;
_chemical_name_common             '(Ph4P)2[V(C3S4O)3]'
_chemical_name_systematic         ?
_chemical_formula_moiety          'C9 O3 S12 V), 2(C24 H20 P), C H4 O'
_chemical_formula_sum             'C58 H44 O4 P2 S12 V'
_chemical_formula_weight          1302.69
_chemical_melting_point           ?
loop_
  _atom_type_symbol
  _atom_type_description
  _atom_type_scat_dispersion_real
  _atom_type_scat_dispersion_imag
  _atom_type_scat_source
 'C' 'C' 0.0181 0.0091 'International Tables Vol C Tables 4.2.6.8 and 6.1.1.4'
 'H' 'H' 0.0000 0.0000 'International Tables Vol C Tables 4.2.6.8 and 6.1.1.4'
 'P' 'P' 0.2955 0.4335 'International Tables Vol C Tables 4.2.6.8 and 6.1.1.4'
 'S' 'S' 0.3331 0.5567 'International Tables Vol C Tables 4.2.6.8 and 6.1.1.4'
 'V' 'V' 0.0687 2.1097 'International Tables Vol C Tables 4.2.6.8 and 6.1.1.4'
 'O' 'O' 0.0492 0.0322 'International Tables Vol C Tables 4.2.6.8 and 6.1.1.4'

_shelx_space_group_comment
;
The symmetry employed for this shelxl refinement is uniquely defined
by the following loop, which should always be used as a source of
symmetry information in preference to the above space-group names.
They are only intended as comments.
;
_space_group_crystal_system       'triclinic'
_space_group_IT_number            2
_space_group_name_H-M_alt         'P -1'
_space_group_name_Hall            '-P 1'
loop_
  _space_group_symop_operation_xyz
 'x, y, z'
 '-x, -y, -z'

_cell_length_a                    10.6733(7)
_cell_length_b                    13.8411(9)
_cell_length_c                    21.2149(14)
_cell_angle_alpha                 96.429(2)
_cell_angle_beta                  90.582(2)
_cell_angle_gamma                 110.889(2)
_cell_volume                      2905.4(3)
_cell_formula_units_Z             2
_cell_measurement_reflns_used     9587
_cell_measurement_temperature     100(2)
_cell_measurement_theta_max       66.623
_cell_measurement_theta_min       3.81
_shelx_estimated_absorpt_T_max    ?
_shelx_estimated_absorpt_T_min    ?
_exptl_absorpt_coefficient_mu     6.358
_exptl_absorpt_correction_T_max   0.7528
_exptl_absorpt_correction_T_min   0.5879
_exptl_absorpt_correction_type    multi-scan
_exptl_absorpt_process_details
;
SADABS-2014/5 (Bruker,2014/5) was used for absorption correction.
wR2(int) was 0.0930 before and 0.0584 after correction.
The Ratio of minimum to maximum transmission is 0.7810.
The \l/2 correction factor is 0.00150.
;
_exptl_absorpt_special_details    ?
_exptl_crystal_colour             'clear greenish blue'
_exptl_crystal_colour_lustre      clear
_exptl_crystal_colour_modifier    greenish
_exptl_crystal_colour_primary     blue
_exptl_crystal_density_diffrn     1.489
_exptl_crystal_density_meas       ?
_exptl_crystal_density_method     'not measured'
_exptl_crystal_description        block
_exptl_crystal_F_000              1338.2
_exptl_crystal_size_max           0.164
_exptl_crystal_size_mid           0.133
_exptl_crystal_size_min           0.086
_exptl_transmission_factor_max    ?
_exptl_transmission_factor_min    ?
_diffrn_reflns_av_R_equivalents   0.0422
_diffrn_reflns_av_unetI/netI      0.0606
_diffrn_reflns_Laue_measured_fraction_full 0.976
_diffrn_reflns_Laue_measured_fraction_max 0.976
_diffrn_reflns_limit_h_max        10
_diffrn_reflns_limit_h_min        -12
_diffrn_reflns_limit_k_max        16
_diffrn_reflns_limit_k_min        -12
_diffrn_reflns_limit_l_max        23
_diffrn_reflns_limit_l_min        -25
_diffrn_reflns_number             24008
_diffrn_reflns_point_group_measured_fraction_full 0.976
_diffrn_reflns_point_group_measured_fraction_max 0.976
_diffrn_reflns_theta_full         66.618
_diffrn_reflns_theta_max          66.618
_diffrn_reflns_theta_min          3.806
_diffrn_ambient_temperature       99.99
_diffrn_detector_area_resol_mean  8
_diffrn_measured_fraction_theta_full 0.976
_diffrn_measured_fraction_theta_max 0.976
_diffrn_measurement_device_type   'Bruker Kappa APEX CCD area detector'
_diffrn_measurement_method        '\w and \f scans'
_diffrn_radiation_monochromator   'MX optics'
_diffrn_radiation_type            CuK\a
_diffrn_radiation_wavelength      1.54178
_diffrn_source                    microsource
_diffrn_standards_number          0
_reflns_Friedel_coverage          0.000
_reflns_Friedel_fraction_full     .
_reflns_Friedel_fraction_max      .
_reflns_number_gt                 8253
_reflns_number_total              10028
_reflns_special_details
;
 Reflections were merged by SHELXL according to the crystal
 class for the calculation of statistics and refinement.
 
 _reflns_Friedel_fraction is defined as the number of unique
 Friedel pairs measured divided by the number that would be
 possible theoretically, ignoring centric projections and
 systematic absences.
;
_reflns_threshold_expression      'I > 2\s(I)'
_computing_cell_refinement        'SAINT v8.34A (Bruker, 2013)'
_computing_data_collection        'APEX2 V2.1-4 (Bruker, 2007)'
_computing_data_reduction         'SAINT v8.34A (Bruker, 2013)'
_computing_molecular_graphics     'Olex2 (Dolomanov et al., 2009)'
_computing_publication_material   'Olex2 (Dolomanov et al., 2009)'
_computing_structure_refinement   'XL (Sheldrick, 2008)'
_computing_structure_solution     'ShelXT (Sheldrick, 2015)'
_refine_diff_density_max          0.854
_refine_diff_density_min          -0.473
_refine_diff_density_rms          0.065
_refine_ls_extinction_coef        .
_refine_ls_extinction_method      none
_refine_ls_goodness_of_fit_ref    1.060
_refine_ls_hydrogen_treatment     mixed
_refine_ls_matrix_type            full
_refine_ls_number_parameters      728
_refine_ls_number_reflns          10028
_refine_ls_number_restraints      118
_refine_ls_R_factor_all           0.0570
_refine_ls_R_factor_gt            0.0471
_refine_ls_restrained_S_all       1.077
_refine_ls_shift/su_max           0.001
_refine_ls_shift/su_mean          0.000
_refine_ls_structure_factor_coef  Fsqd
_refine_ls_weighting_details
'w=1/[\s^2^(Fo^2^)+(0.0456P)^2^+2.5088P] where P=(Fo^2^+2Fc^2^)/3'
_refine_ls_weighting_scheme       calc
_refine_ls_wR_factor_gt           0.1202
_refine_ls_wR_factor_ref          0.1266
_refine_special_details           ?
_olex2_refinement_description
;
1. Fixed Uiso
 At 1.2 times of:
  All C(H) groups, {H63,H63A,H63B} of C63
 At 1.5 times of:
  {H74A,H74B,H74C} of C74
2. Restrained distances
 C11-C10 \\sim C7-C8 \\sim C4-C5
 with sigma of 0.02
 C11-S4 \\sim S4A-C7 \\sim C10-S3 \\sim S3A-C8 \\sim C5-S7
 with sigma of 0.02
 S4-C12 \\sim C9-S4A \\sim C5-S7
 with sigma of 0.02
 S4-C12 \\sim C12-S3
 with sigma of 0.02
 S4A-C9 \\sim C9-S3A
 with sigma of 0.02
 C12-O1 \\sim C9-O1A \\sim C6-O2
 with sigma of 0.02
 C41-C40 \\sim C32-C33 \\sim C37-C38 \\sim C36-C35
 with sigma of 0.02
 C40-C39 \\sim C33-C34 \\sim C37-C38 \\sim C36-C35
 with sigma of 0.02
 C41-C44A \\sim C44A-C37
 with sigma of 0.02
 C32-C31 \\sim C31-C36
 with sigma of 0.02
 C44A-P1 \\sim P1-C31
 with sigma of 0.02
 S3-S4 \\sim S4A-S3A
 with sigma of 0.02
 C71-C60 \\sim C60-C72
 with sigma of 0.01
 C67-C60 \\sim C60-C68
 with sigma of 0.01
 C62-C63 \\sim C63-C64
 with sigma of 0.01
 C73-C63 \\sim C63-C70
 with sigma of 0.01
 C66-C63 \\sim C63-C69
 with sigma of 0.01
 C69-C67 \\sim C66-C68 \\sim C71-C73 \\sim C70-C72 \\sim C65-C62 \\sim C58-C55
 with sigma of 0.01
 C60-C63 \\sim C54-C57
 with sigma of 0.01
 C64-C65 \\sim C66-C67 \\sim C73-C72 \\sim C62-C61 \\sim C69-C68 \\sim C70-C71
 with sigma of 0.01
 C61-C60 \\sim C60-C65
 with sigma of 0.01
 C62-C61 \\sim C47-C46
 with sigma of 0.01
 C62-C65 \\sim C64-C61 \\sim C58-C55
 with sigma of 0.01
 C80-C79 \\sim C78-C77 \\sim C76-C75
 with sigma of 0.01
 C79-C78 \\sim C75-C80 \\sim C50-C49
 with sigma of 0.01
 C48-P2 \\sim P2-C75
 with sigma of 0.01
3. Others
 1*[Sof(H63)+Sof(C67)+Sof(H67)+Sof(C68)+Sof(H68)+Sof(C66)+Sof(H66)+Sof(C69)+
 Sof(H69)]+1*[Sof(H63B)+Sof(C71)+Sof(H71)+Sof(C70)+Sof(H70)+Sof(C73)+Sof(H73)+
 Sof(C72)+Sof(H72)]+1*[Sof(C48)+Sof(C49)+Sof(H49)+Sof(C50)+Sof(H50)+Sof(C51)+
 Sof(H51)+Sof(H63A)+Sof(C53)+Sof(H53)+Sof(C52)+Sof(H52)+Sof(C61)+Sof(H61)+
 Sof(C64)+Sof(H64)+Sof(C62)+Sof(H62)+Sof(C65)+Sof(H65)+Sof(C76)+Sof(H76)+
 Sof(C77)+Sof(H77)+Sof(C78)+Sof(H78)+Sof(C79)+Sof(H79)+Sof(C80)+Sof(H80)+
 Sof(C75)]=1 with esd of 0.005
 Sof(H63)=Sof(C67)=Sof(H67)=Sof(C68)=Sof(H68)=Sof(C66)=Sof(H66)=Sof(C69)=
 Sof(H69)=FVAR(1)
 Sof(H63B)=Sof(C71)=Sof(H71)=Sof(C70)=Sof(H70)=Sof(C73)=Sof(H73)=Sof(C72)=
 Sof(H72)=FVAR(2)
 Sof(C48)=Sof(C49)=Sof(H49)=Sof(C50)=Sof(H50)=Sof(C51)=Sof(H51)=Sof(C53)=
 Sof(H53)=Sof(C52)=Sof(H52)=1-FVAR(3)
 Sof(H63A)=Sof(C61)=Sof(H61)=Sof(C64)=Sof(H64)=Sof(C62)=Sof(H62)=Sof(C65)=
 Sof(H65)=Sof(C76)=Sof(H76)=Sof(C77)=Sof(H77)=Sof(C78)=Sof(H78)=Sof(C79)=
 Sof(H79)=Sof(C80)=Sof(H80)=Sof(C75)=FVAR(3)
 Sof(O1A)=Sof(C9)=Sof(S3A)=Sof(S4A)=Sof(C8)=Sof(C7)=1-FVAR(4)
 Sof(S4)=Sof(S3)=Sof(C11)=Sof(C10)=Sof(O1)=Sof(C12)=FVAR(4)
 Sof(C41)=Sof(H41)=Sof(C40)=Sof(H40)=Sof(C39)=Sof(H39)=Sof(C37)=Sof(H37)=
 Sof(C38)=Sof(H38)=Sof(C44A)=1-FVAR(5)
 Sof(C31)=Sof(C36)=Sof(H36)=Sof(C35)=Sof(H35)=Sof(C32)=Sof(H32)=Sof(C34)=
 Sof(H34)=Sof(C33)=Sof(H33)=FVAR(5)
4.a Aromatic/amide H refined with riding coordinates:
 C26(H26), C24(H24), C20(H20), C21(H21), C23(H23), C49(H49), C18(H18),
 C14(H14), C43(H43), C44(H44), C55(H55), C27(H27), C22(H22), C17(H17), C50(H50),
  C28(H28), C16(H16), C51(H51), C29(H29), C45(H45), C30(H30), C56(H56),
 C47(H47), C46(H46), C15(H15), C36(H36), C57(H57), C58(H58), C59(H59), C63(H63),
  C63(H63A), C63(H63B), C35(H35), C32(H32), C34(H34), C53(H53), C33(H33),
 C52(H52), C67(H67), C68(H68), C66(H66), C69(H69), C61(H61), C64(H64), C62(H62),
  C65(H65), C71(H71), C70(H70), C73(H73), C72(H72), C41(H41), C40(H40),
 C39(H39), C37(H37), C38(H38), C76(H76), C77(H77), C78(H78), C79(H79), C80(H80)
4.b Idealised Me refined as rotating group:
 C74(H74A,H74B,H74C)
;
_atom_sites_solution_hydrogens    mixed
_atom_sites_solution_primary      direct
_atom_sites_solution_secondary    ?
loop_
  _atom_site_label
  _atom_site_type_symbol
  _atom_site_fract_x
  _atom_site_fract_y
  _atom_site_fract_z
  _atom_site_U_iso_or_equiv
  _atom_site_adp_type
  _atom_site_occupancy
  _atom_site_site_symmetry_order
  _atom_site_calc_flag
  _atom_site_refinement_flags_posn
  _atom_site_refinement_flags_adp
  _atom_site_refinement_flags_occupancy
  _atom_site_disorder_assembly
  _atom_site_disorder_group
 V1 V 0.56816(5) 0.19031(5) 0.77009(3) 0.03583(15) Uani 1 1 d . . . . .
 S6 S 0.34576(8) 0.06863(7) 0.77260(4) 0.03741(19) Uani 1 1 d . . . . .
 P1 P 0.19818(8) 0.26813(6) 0.43012(4) 0.03287(19) Uani 1 1 d D . . . .
 S2 S 0.46590(8) 0.31552(7) 0.76552(4) 0.0410(2) Uani 1 1 d . . . . .
 S9 S 0.50634(8) 0.15153(7) 0.65994(4) 0.0411(2) Uani 1 1 d . . . . .
 S5 S 0.63606(9) 0.05430(8) 0.79927(4) 0.0435(2) Uani 1 1 d . . . . .
 P2 P -0.07260(9) 0.17821(8) 0.03992(4) 0.0376(2) Uani 1 1 d D . . . .
 S10 S 0.78988(8) 0.27609(7) 0.73600(4) 0.0441(2) Uani 1 1 d . . . . .
 S11 S 0.90152(9) 0.34043(7) 0.60994(4) 0.0485(2) Uani 1 1 d . . . . .
 S8 S 0.23456(10) -0.16761(8) 0.75251(4) 0.0511(2) Uani 1 1 d . . . . .
 S12 S 0.63880(10) 0.22833(9) 0.54163(4) 0.0540(3) Uani 1 1 d . . . . .
 S7 S 0.49790(11) -0.17964(9) 0.78190(5) 0.0572(3) Uani 1 1 d D . . . .
 S1 S 0.65396(10) 0.28097(9) 0.87231(4) 0.0567(3) Uani 1 1 d . . . . .
 S4 S 0.4872(5) 0.5207(4) 0.8297(3) 0.0467(12) Uani 0.430(12) 1 d D . P A 1
 S3 S 0.6714(6) 0.5065(4) 0.9282(4) 0.0621(15) Uani 0.430(12) 1 d D . P A 1
 O4 O -0.0603(3) 0.0997(2) 0.69295(16) 0.0644(8) Uani 1 1 d . . . . .
 O3 O 0.8590(3) 0.3373(2) 0.48654(13) 0.0604(7) Uani 1 1 d . . . . .
 O2 O 0.2847(4) -0.3436(3) 0.74242(16) 0.0796(10) Uani 1 1 d D . . . .
 C19 C 0.0394(3) 0.1684(2) 0.44004(14) 0.0301(6) Uani 1 1 d . . . . .
 C26 C 0.2795(3) 0.1061(3) 0.38389(14) 0.0349(7) Uani 1 1 d . . . . .
 H26 H 0.1865 0.0649 0.3787 0.042 Uiso 1 1 calc R . . . .
 C13 C 0.2544(3) 0.3496(3) 0.50462(14) 0.0353(7) Uani 1 1 d . . . . .
 C24 C -0.0047(3) 0.1540(2) 0.50084(14) 0.0333(7) Uani 1 1 d . . . . .
 H24 H 0.0501 0.1953 0.5367 0.040 Uiso 1 1 calc R . . . .
 C48 C 0.0086(6) 0.1484(5) 0.1065(2) 0.0290(17) Uiso 0.662(6) 1 d D . P B 1
 C20 C -0.0408(3) 0.1068(3) 0.38750(15) 0.0345(7) Uani 1 1 d . . . . .
 H20 H -0.0106 0.1159 0.3458 0.041 Uiso 1 1 calc R . . . .
 C21 C -0.1636(3) 0.0331(3) 0.39629(17) 0.0392(8) Uani 1 1 d . . . . .
 H21 H -0.2182 -0.0088 0.3606 0.047 Uiso 1 1 calc R . . . .
 C25 C 0.3210(3) 0.2112(3) 0.40777(14) 0.0370(7) Uani 1 1 d . . . . .
 C23 C -0.1282(3) 0.0795(3) 0.50914(16) 0.0413(8) Uani 1 1 d . . . . .
 H23 H -0.1583 0.0694 0.5507 0.050 Uiso 1 1 calc R . . . .
 C49 C -0.0249(7) 0.0523(6) 0.1269(3) 0.0320(18) Uiso 0.662(6) 1 d D . P B 1
 H49 H -0.0946 -0.0054 0.1044 0.038 Uiso 0.662(6) 1 calc R . P B 1
 C18 C 0.3274(4) 0.3229(3) 0.54954(16) 0.0437(8) Uani 1 1 d . . . . .
 H18 H 0.3561 0.2657 0.5394 0.052 Uiso 1 1 calc R . . . .
 C60 C -0.1125(3) 0.2919(3) 0.06419(16) 0.0443(9) Uani 1 1 d D . . . .
 C14 C 0.2113(3) 0.4335(3) 0.51938(16) 0.0409(8) Uani 1 1 d . . . . .
 H14 H 0.1620 0.4523 0.4885 0.049 Uiso 1 1 calc R . . . .
 C54 C -0.2204(3) 0.0654(3) 0.02015(15) 0.0409(8) Uani 1 1 d D . . . .
 C42 C 0.0262(3) 0.2045(3) -0.02807(15) 0.0413(8) Uani 1 1 d . . . . .
 C43 C 0.1576(3) 0.2074(3) -0.02854(16) 0.0402(8) Uani 1 1 d . . . . .
 H43 H 0.1982 0.1941 0.0079 0.048 Uiso 1 1 calc R . . . .
 C44 C 0.2292(3) 0.2298(3) -0.08268(17) 0.0436(8) Uani 1 1 d . . . . .
 H44 H 0.3196 0.2330 -0.0829 0.052 Uiso 1 1 calc R . . . .
 C55 C -0.2417(4) 0.0053(3) -0.03858(15) 0.0426(8) Uani 1 1 d D . . . .
 H55 H -0.1807 0.0271 -0.0710 0.051 Uiso 1 1 calc R . . . .
 C27 C 0.3747(3) 0.0621(3) 0.36776(15) 0.0417(8) Uani 1 1 d . . . . .
 H27 H 0.3471 -0.0098 0.3520 0.050 Uiso 1 1 calc R . . . .
 C31 C 0.1663(8) 0.3453(5) 0.3705(3) 0.0321(18) Uiso 0.643(13) 1 d D . P C 1
 C22 C -0.2083(3) 0.0195(3) 0.45674(17) 0.0421(8) Uani 1 1 d . . . . .
 H22 H -0.2939 -0.0309 0.4624 0.050 Uiso 1 1 calc R . . . .
 C1 C 0.7686(3) 0.2739(3) 0.65475(16) 0.0388(8) Uani 1 1 d . . . . .
 C17 C 0.3584(4) 0.3800(3) 0.60941(17) 0.0501(9) Uani 1 1 d . . . . .
 H17 H 0.4098 0.3629 0.6401 0.060 Uiso 1 1 calc R . . . .
 C50 C 0.0408(7) 0.0378(6) 0.1795(3) 0.0349(19) Uiso 0.662(6) 1 d D . P B 1
 H50 H 0.0157 -0.0293 0.1932 0.042 Uiso 0.662(6) 1 calc R . P B 1
 C28 C 0.5099(3) 0.1231(3) 0.37470(16) 0.0476(9) Uani 1 1 d . . . . .
 H28 H 0.5751 0.0925 0.3646 0.057 Uiso 1 1 calc R . . . .
 C16 C 0.3140(4) 0.4625(3) 0.62431(17) 0.0494(9) Uani 1 1 d . . . . .
 H16 H 0.3338 0.5007 0.6655 0.059 Uiso 1 1 calc R . . . .
 C51 C 0.1406(8) 0.1191(6) 0.2113(3) 0.0404(19) Uiso 0.662(6) 1 d . . P B 1
 H51 H 0.1881 0.1086 0.2464 0.048 Uiso 0.662(6) 1 calc R . P B 1
 C2 C 0.6483(3) 0.2231(3) 0.62323(16) 0.0419(8) Uani 1 1 d . . . . .
 C5 C 0.4907(4) -0.0550(3) 0.78448(15) 0.0428(8) Uani 1 1 d D . . . .
 C4 C 0.3690(4) -0.0492(3) 0.77165(15) 0.0415(8) Uani 1 1 d D . . . .
 C29 C 0.5503(4) 0.2276(3) 0.39606(17) 0.0536(10) Uani 1 1 d . . . . .
 H29 H 0.6432 0.2694 0.3986 0.064 Uiso 1 1 calc R . . . .
 C45 C 0.1703(3) 0.2474(3) -0.13600(16) 0.0465(9) Uani 1 1 d . . . . .
 H45 H 0.2196 0.2611 -0.1731 0.056 Uiso 1 1 calc R . . . .
 C30 C 0.4577(3) 0.2726(3) 0.41383(17) 0.0499(10) Uani 1 1 d . . . . .
 H30 H 0.4863 0.3443 0.4300 0.060 Uiso 1 1 calc R . . . .
 C56 C -0.3514(4) -0.0861(3) -0.04980(17) 0.0496(9) Uani 1 1 d . . . . .
 H56 H -0.3658 -0.1268 -0.0902 0.060 Uiso 1 1 calc R . . . .
 C47 C -0.0320(3) 0.2244(3) -0.08188(16) 0.0504(10) Uani 1 1 d D . . . .
 H47 H -0.1213 0.2237 -0.0814 0.060 Uiso 1 1 calc R . . . .
 C46 C 0.0391(3) 0.2451(3) -0.13600(16) 0.0513(10) Uani 1 1 d D . . . .
 H46 H -0.0013 0.2576 -0.1728 0.062 Uiso 1 1 calc R . . . .
 C15 C 0.2415(4) 0.4890(3) 0.57972(17) 0.0463(9) Uani 1 1 d . . . . .
 H15 H 0.2119 0.5456 0.5903 0.056 Uiso 1 1 calc R . . . .
 C36 C 0.0387(9) 0.3424(5) 0.3551(3) 0.0380(18) Uiso 0.643(13) 1 d D . P C 1
 H36 H -0.0361 0.3015 0.3764 0.046 Uiso 0.643(13) 1 calc R . P C 1
 C57 C -0.4406(4) -0.1196(3) -0.00326(18) 0.0541(10) Uani 1 1 d D . . . .
 H57 H -0.5145 -0.1838 -0.0112 0.065 Uiso 1 1 calc R . . . .
 C11 C 0.5235(8) 0.4085(6) 0.8233(5) 0.026(2) Uiso 0.430(12) 1 d D . P A 1
 C74 C 0.0698(4) 0.1736(3) 0.68864(17) 0.0504(9) Uani 1 1 d . . . . .
 H74A H 0.0979 0.1669 0.6451 0.076 Uiso 1 1 calc GR . . . .
 H74B H 0.1328 0.1613 0.7178 0.076 Uiso 1 1 calc GR . . . .
 H74C H 0.0689 0.2439 0.7001 0.076 Uiso 1 1 calc GR . . . .
 C3 C 0.8102(4) 0.3084(3) 0.53590(19) 0.0505(9) Uani 1 1 d . . . . .
 C58 C -0.4217(4) -0.0588(4) 0.05519(18) 0.0672(13) Uani 1 1 d D . . . .
 H58 H -0.4842 -0.0801 0.0871 0.081 Uiso 1 1 calc R . . . .
 C59 C -0.3128(4) 0.0320(4) 0.06676(17) 0.0627(13) Uani 1 1 d . . . . .
 H59 H -0.2996 0.0729 0.1070 0.075 Uiso 1 1 calc R . . . .
 C6 C 0.3306(5) -0.2500(3) 0.7560(2) 0.0629(11) Uani 1 1 d D . . . .
 C10 C 0.6092(7) 0.4026(6) 0.8690(4) 0.027(2) Uiso 0.430(12) 1 d D . P A 1
 C63 C -0.1673(4) 0.4701(3) 0.1019(2) 0.0664(12) Uani 1 1 d D . . . .
 H63 H -0.1851 0.5317 0.1148 0.080 Uiso 0.456(10) 1 calc R . P B 1
 H63A H -0.1933 0.5272 0.1167 0.080 Uiso 0.338(6) 1 calc R . P B 2
 H63B H -0.1773 0.5334 0.1185 0.080 Uiso 0.209(10) 1 calc R . P B 3
 C35 C 0.0206(9) 0.3992(5) 0.3087(3) 0.0468(18) Uiso 0.643(13) 1 d D . P C 1
 H35 H -0.0672 0.3970 0.2981 0.056 Uiso 0.643(13) 1 calc R . P C 1
 C32 C 0.2775(7) 0.4103(5) 0.3413(3) 0.0429(17) Uiso 0.643(13) 1 d D . P C 1
 H32 H 0.3656 0.4147 0.3534 0.052 Uiso 0.643(13) 1 calc R . P C 1
 C34 C 0.1282(8) 0.4594(5) 0.2773(3) 0.0450(18) Uiso 0.643(13) 1 d D . P C 1
 H34 H 0.1137 0.4949 0.2437 0.054 Uiso 0.643(13) 1 calc R . P C 1
 C53 C 0.1072(7) 0.2353(5) 0.1401(3) 0.0456(15) Uiso 0.662(6) 1 d . . P B 1
 H53 H 0.1278 0.3028 0.1276 0.055 Uiso 0.662(6) 1 calc R . P B 1
 C33 C 0.2591(8) 0.4678(5) 0.2953(3) 0.0490(18) Uiso 0.643(13) 1 d D . P C 1
 H33 H 0.3341 0.5126 0.2760 0.059 Uiso 0.643(13) 1 calc R . P C 1
 C52 C 0.1750(7) 0.2198(5) 0.1928(3) 0.0511(16) Uiso 0.662(6) 1 d . . P B 1
 H52 H 0.2442 0.2770 0.2159 0.061 Uiso 0.662(6) 1 calc R . P B 1
 O1 O 0.5961(10) 0.6686(7) 0.9232(6) 0.072(3) Uani 0.430(12) 1 d D . P A 1
 C12 C 0.5824(9) 0.5807(7) 0.9007(5) 0.048(3) Uiso 0.430(12) 1 d D . P A 1
 C67 C -0.2412(7) 0.2779(4) 0.0847(4) 0.0302(19) Uiso 0.456(10) 1 d D . P B 1
 H67 H -0.3068 0.2103 0.0857 0.036 Uiso 0.456(10) 1 calc R . P B 1
 C68 C -0.0194(7) 0.3857(5) 0.0588(4) 0.042(2) Uiso 0.456(10) 1 d D . P B 1
 H68 H 0.0627 0.3909 0.0399 0.051 Uiso 0.456(10) 1 calc R . P B 1
 C66 C -0.2687(7) 0.3672(5) 0.1036(5) 0.040(2) Uiso 0.456(10) 1 d D . P B 1
 H66 H -0.3551 0.3611 0.1178 0.048 Uiso 0.456(10) 1 calc R . P B 1
 C69 C -0.0441(8) 0.4741(5) 0.0808(5) 0.052(3) Uiso 0.456(10) 1 d D . P B 1
 H69 H 0.0260 0.5400 0.0816 0.062 Uiso 0.456(10) 1 calc R . P B 1
 C61 C -0.0284(11) 0.3776(8) 0.1137(6) 0.066(4) Uiso 0.338(6) 1 d D . P B 2
 H61 H 0.0476 0.3704 0.1334 0.079 Uiso 0.338(6) 1 calc R . P B 2
 C64 C -0.2431(11) 0.4068(8) 0.0559(5) 0.055(3) Uiso 0.338(6) 1 d D . P B 2
 H64 H -0.3148 0.4196 0.0361 0.066 Uiso 0.338(6) 1 calc R . P B 2
 C62 C -0.0570(13) 0.4681(9) 0.1323(6) 0.082(5) Uiso 0.338(6) 1 d D . P B 2
 H62 H -0.0036 0.5226 0.1634 0.098 Uiso 0.338(6) 1 calc R . P B 2
 C65 C -0.2132(10) 0.3194(7) 0.0375(5) 0.049(3) Uiso 0.338(6) 1 d D . P B 2
 H65 H -0.2668 0.2728 0.0029 0.059 Uiso 0.338(6) 1 calc R . P B 2
 C71 C -0.0606(16) 0.3715(9) 0.0310(7) 0.032(4) Uiso 0.209(10) 1 d D . P B 3
 H71 H -0.0112 0.3653 -0.0053 0.038 Uiso 0.209(10) 1 calc R . P B 3
 C70 C -0.0801(17) 0.4642(9) 0.0506(8) 0.037(4) Uiso 0.209(10) 1 d D . P B 3
 H70 H -0.0361 0.5241 0.0302 0.045 Uiso 0.209(10) 1 calc R . P B 3
 C73 C -0.237(2) 0.3726(11) 0.1258(11) 0.062(7) Uiso 0.209(10) 1 d D . P B 3
 H73 H -0.3065 0.3679 0.1544 0.074 Uiso 0.209(10) 1 calc R . P B 3
 C72 C -0.205(2) 0.2857(12) 0.1072(12) 0.073(7) Uiso 0.209(10) 1 d D . P B 3
 H72 H -0.2470 0.2226 0.1249 0.087 Uiso 0.209(10) 1 calc R . P B 3
 O1A O 0.5687(8) 0.6314(7) 0.9626(6) 0.090(3) Uani 0.570(12) 1 d D . P A 2
 C9 C 0.5687(7) 0.5520(6) 0.9306(4) 0.057(2) Uiso 0.570(12) 1 d D . P A 2
 S3A S 0.6508(3) 0.4705(5) 0.9531(2) 0.0668(13) Uani 0.570(12) 1 d D . P A 2
 S4A S 0.4830(4) 0.5078(3) 0.8557(3) 0.0576(10) Uani 0.570(12) 1 d D . P A 2
 C8 C 0.6067(7) 0.3776(6) 0.8850(4) 0.0419(19) Uiso 0.570(12) 1 d D . P A 2
 C7 C 0.5307(7) 0.3976(5) 0.8414(4) 0.0343(18) Uiso 0.570(12) 1 d D . P A 2
 C41 C 0.3101(13) 0.3857(9) 0.3376(5) 0.045(3) Uiso 0.357(13) 1 d D . P C 2
 H41 H 0.3896 0.3730 0.3472 0.055 Uiso 0.357(13) 1 calc R . P C 2
 C40 C 0.3102(13) 0.4483(10) 0.2916(6) 0.057(4) Uiso 0.357(13) 1 d D . P C 2
 H40 H 0.3893 0.4807 0.2702 0.069 Uiso 0.357(13) 1 calc R . P C 2
 C39 C 0.1921(13) 0.4626(7) 0.2773(4) 0.029(3) Uiso 0.357(13) 1 d D . P C 2
 H39 H 0.1920 0.5069 0.2462 0.035 Uiso 0.357(13) 1 calc R . P C 2
 C37 C 0.0818(17) 0.3547(10) 0.3545(5) 0.042(4) Uiso 0.357(13) 1 d D . P C 2
 H37 H 0.0038 0.3225 0.3766 0.051 Uiso 0.357(13) 1 calc R . P C 2
 C38 C 0.0758(15) 0.4161(9) 0.3057(5) 0.041(3) Uiso 0.357(13) 1 d D . P C 2
 H38 H -0.0055 0.4242 0.2936 0.049 Uiso 0.357(13) 1 calc R . P C 2
 C44A C 0.1979(12) 0.3418(9) 0.3694(5) 0.032(3) Uiso 0.357(13) 1 d D . P C 2
 H4 H -0.114(5) 0.124(4) 0.712(2) 0.065(14) Uiso 1 1 d . . . . .
 C76 C 0.1580(10) 0.2408(7) 0.1277(5) 0.030(2) Uiso 0.338(6) 1 d D . P B 2
 H76 H 0.1974 0.3022 0.1080 0.036 Uiso 0.338(6) 1 calc R . P B 2
 C77 C 0.2263(12) 0.2261(7) 0.1786(5) 0.035(2) Uiso 0.338(6) 1 d D . P B 2
 H77 H 0.3124 0.2755 0.1927 0.042 Uiso 0.338(6) 1 calc R . P B 2
 C78 C 0.1701(11) 0.1405(8) 0.2087(5) 0.027(3) Uiso 0.338(6) 1 d D . P B 2
 H78 H 0.2110 0.1334 0.2470 0.033 Uiso 0.338(6) 1 calc R . P B 2
 C79 C 0.0522(12) 0.0637(10) 0.1827(5) 0.034(4) Uiso 0.338(6) 1 d D . P B 2
 H79 H 0.0167 0.0005 0.2010 0.040 Uiso 0.338(6) 1 calc R . P B 2
 C80 C -0.0144(13) 0.0781(10) 0.1305(6) 0.035(4) Uiso 0.338(6) 1 d D . P B 2
 H80 H -0.0944 0.0243 0.1128 0.042 Uiso 0.338(6) 1 calc R . P B 2
 C75 C 0.0350(9) 0.1707(8) 0.1039(4) 0.020(3) Uiso 0.338(6) 1 d D . P B 2

loop_
  _atom_site_aniso_label
  _atom_site_aniso_U_11
  _atom_site_aniso_U_22
  _atom_site_aniso_U_33
  _atom_site_aniso_U_23
  _atom_site_aniso_U_13
  _atom_site_aniso_U_12
 V1 0.0297(3) 0.0509(3) 0.0297(3) -0.0046(2) 0.0015(2) 0.0207(3)
 S6 0.0320(4) 0.0523(5) 0.0315(4) 0.0004(3) 0.0021(3) 0.0208(4)
 P1 0.0296(4) 0.0374(4) 0.0249(4) -0.0021(3) 0.0025(3) 0.0056(3)
 S2 0.0311(4) 0.0443(5) 0.0492(5) 0.0033(4) 0.0129(4) 0.0161(4)
 S9 0.0284(4) 0.0651(6) 0.0302(4) -0.0005(4) 0.0018(3) 0.0193(4)
 S5 0.0396(5) 0.0645(6) 0.0352(4) 0.0028(4) 0.0004(3) 0.0303(4)
 P2 0.0374(5) 0.0629(6) 0.0259(4) 0.0088(4) 0.0083(3) 0.0329(4)
 S10 0.0308(4) 0.0588(5) 0.0399(4) -0.0086(4) 0.0019(3) 0.0170(4)
 S11 0.0395(5) 0.0490(5) 0.0507(5) -0.0053(4) 0.0138(4) 0.0112(4)
 S8 0.0539(6) 0.0551(5) 0.0426(5) -0.0095(4) -0.0034(4) 0.0224(5)
 S12 0.0408(5) 0.0876(7) 0.0409(5) 0.0128(5) 0.0078(4) 0.0302(5)
 S7 0.0698(7) 0.0655(6) 0.0486(5) -0.0044(5) -0.0012(5) 0.0430(6)
 S1 0.0458(5) 0.0847(7) 0.0405(5) -0.0199(5) -0.0079(4) 0.0331(5)
 S4 0.0377(15) 0.0413(18) 0.059(3) -0.0095(18) 0.0004(18) 0.0169(13)
 S3 0.058(2) 0.057(2) 0.065(3) -0.0286(19) -0.017(2) 0.0255(18)
 O4 0.0512(17) 0.0529(17) 0.088(2) -0.0089(15) 0.0094(16) 0.0221(15)
 O3 0.0565(17) 0.078(2) 0.0584(17) 0.0210(15) 0.0194(14) 0.0341(15)
 O2 0.100(3) 0.065(2) 0.079(2) -0.0170(17) -0.0030(19) 0.0429(19)
 C19 0.0267(15) 0.0333(16) 0.0312(15) 0.0017(12) 0.0023(12) 0.0126(13)
 C26 0.0279(16) 0.0464(19) 0.0263(15) -0.0001(13) 0.0042(12) 0.0097(14)
 C13 0.0300(16) 0.0397(18) 0.0284(15) -0.0042(13) 0.0039(13) 0.0054(14)
 C24 0.0370(18) 0.0366(17) 0.0283(15) 0.0026(13) 0.0039(13) 0.0160(14)
 C20 0.0320(17) 0.0415(18) 0.0289(15) 0.0003(13) -0.0006(13) 0.0131(14)
 C21 0.0270(17) 0.0415(18) 0.0451(19) -0.0029(15) -0.0030(14) 0.0102(15)
 C25 0.0297(17) 0.0478(19) 0.0273(15) -0.0019(14) 0.0043(13) 0.0083(15)
 C23 0.042(2) 0.0415(19) 0.0394(18) 0.0042(15) 0.0127(15) 0.0140(16)
 C18 0.041(2) 0.053(2) 0.0339(17) -0.0069(15) -0.0027(15) 0.0168(17)
 C60 0.040(2) 0.064(2) 0.0440(19) 0.0207(17) 0.0165(16) 0.0332(18)
 C14 0.0382(19) 0.0374(18) 0.0387(18) -0.0032(14) 0.0002(15) 0.0059(15)
 C54 0.0318(17) 0.075(2) 0.0256(15) 0.0075(15) 0.0016(13) 0.0304(17)
 C42 0.0338(18) 0.071(2) 0.0281(16) 0.0051(15) 0.0051(14) 0.0295(17)
 C43 0.0303(17) 0.054(2) 0.0393(18) -0.0043(15) -0.0012(14) 0.0218(16)
 C44 0.0270(17) 0.057(2) 0.047(2) -0.0046(16) 0.0057(15) 0.0192(16)
 C55 0.050(2) 0.064(2) 0.0287(16) 0.0087(15) 0.0078(15) 0.037(2)
 C27 0.0368(19) 0.057(2) 0.0300(16) -0.0023(15) 0.0041(14) 0.0176(17)
 C22 0.0276(17) 0.0403(19) 0.055(2) 0.0038(16) 0.0083(15) 0.0086(15)
 C1 0.0326(18) 0.0430(18) 0.0432(18) -0.0018(15) 0.0099(14) 0.0183(15)
 C17 0.044(2) 0.064(2) 0.0325(18) -0.0055(16) -0.0095(15) 0.0117(19)
 C28 0.0335(19) 0.073(3) 0.0349(18) -0.0072(17) 0.0055(15) 0.0215(18)
 C16 0.041(2) 0.056(2) 0.0353(18) -0.0123(16) 0.0003(16) 0.0034(18)
 C2 0.0365(19) 0.059(2) 0.0370(18) -0.0003(16) 0.0057(15) 0.0271(17)
 C5 0.051(2) 0.058(2) 0.0285(16) -0.0008(15) 0.0023(15) 0.0316(18)
 C4 0.046(2) 0.057(2) 0.0241(15) -0.0044(14) 0.0009(14) 0.0239(17)
 C29 0.0289(18) 0.079(3) 0.0394(19) -0.0104(19) 0.0058(15) 0.0084(18)
 C45 0.0325(18) 0.063(2) 0.0352(18) -0.0038(16) 0.0114(15) 0.0088(17)
 C30 0.0331(19) 0.060(2) 0.0405(19) -0.0129(17) 0.0077(15) 0.0027(17)
 C56 0.059(2) 0.067(3) 0.0343(18) 0.0060(17) 0.0012(17) 0.037(2)
 C47 0.0264(17) 0.094(3) 0.0382(19) 0.0191(19) 0.0082(15) 0.0277(19)
 C46 0.0324(19) 0.087(3) 0.0302(17) 0.0105(18) 0.0056(15) 0.0155(19)
 C15 0.042(2) 0.0427(19) 0.044(2) -0.0110(15) 0.0038(16) 0.0076(16)
 C57 0.045(2) 0.078(3) 0.046(2) 0.014(2) -0.0069(17) 0.029(2)
 C74 0.050(2) 0.062(2) 0.0403(19) -0.0033(17) 0.0021(17) 0.024(2)
 C3 0.048(2) 0.058(2) 0.058(2) 0.0139(19) 0.0168(19) 0.0317(19)
 C58 0.032(2) 0.129(4) 0.036(2) 0.014(2) 0.0033(16) 0.023(2)
 C59 0.033(2) 0.121(4) 0.0270(18) -0.003(2) 0.0028(15) 0.023(2)
 C6 0.079(3) 0.062(3) 0.053(2) -0.012(2) -0.001(2) 0.037(2)
 C63 0.061(3) 0.067(3) 0.090(3) 0.016(2) 0.023(2) 0.043(2)
 O1 0.063(5) 0.054(5) 0.093(8) -0.030(5) -0.009(5) 0.027(4)
 O1A 0.068(4) 0.072(5) 0.108(7) -0.045(5) -0.009(4) 0.016(4)
 S3A 0.0446(13) 0.089(3) 0.0536(19) -0.0295(17) -0.0078(12) 0.0197(15)
 S4A 0.0528(13) 0.0425(13) 0.073(3) -0.0043(16) 0.0090(17) 0.0145(10)

_geom_special_details
;
 All esds (except the esd in the dihedral angle between two l.s. planes)
 are estimated using the full covariance matrix.  The cell esds are taken
 into account individually in the estimation of esds in distances, angles
 and torsion angles; correlations between esds in cell parameters are only
 used when they are defined by crystal symmetry.  An approximate (isotropic)
 treatment of cell esds is used for estimating esds involving l.s. planes.
;
loop_
  _geom_bond_atom_site_label_1
  _geom_bond_atom_site_label_2
  _geom_bond_distance
  _geom_bond_site_symmetry_2
  _geom_bond_publ_flag
 V1 S6 2.3761(10) . ?
 V1 S2 2.3639(10) . ?
 V1 S9 2.3705(9) . ?
 V1 S5 2.3828(11) . ?
 V1 S10 2.3992(10) . ?
 V1 S1 2.3763(10) . ?
 S6 C4 1.732(4) . ?
 P1 C19 1.796(3) . ?
 P1 C13 1.797(3) . ?
 P1 C25 1.797(3) . ?
 P1 C31 1.847(6) . ?
 P1 C44A 1.730(10) . ?
 S2 C11 1.614(8) . ?
 S2 C7 1.836(7) . ?
 S9 C2 1.735(4) . ?
 S5 C5 1.733(4) . ?
 P2 C48 1.811(4) . ?
 P2 C60 1.795(4) . ?
 P2 C54 1.785(4) . ?
 P2 C42 1.789(3) . ?
 P2 C75 1.804(6) . ?
 S10 C1 1.732(4) . ?
 S11 C1 1.748(3) . ?
 S11 C3 1.766(4) . ?
 S8 C4 1.753(4) . ?
 S8 C6 1.791(4) . ?
 S12 C2 1.744(3) . ?
 S12 C3 1.783(4) . ?
 S7 C5 1.749(4) . ?
 S7 C6 1.749(5) . ?
 S1 C10 1.915(9) . ?
 S1 C8 1.587(8) . ?
 S4 C11 1.723(8) . ?
 S4 C12 1.755(8) . ?
 S3 C10 1.728(7) . ?
 S3 C12 1.766(8) . ?
 O4 C74 1.412(5) . ?
 O4 H4 0.85(5) . ?
 O3 C3 1.218(5) . ?
 O2 C6 1.210(5) . ?
 C19 C24 1.389(4) . ?
 C19 C20 1.396(4) . ?
 C26 H26 0.9500 . ?
 C26 C25 1.392(5) . ?
 C26 C27 1.387(5) . ?
 C13 C18 1.386(5) . ?
 C13 C14 1.400(5) . ?
 C24 H24 0.9500 . ?
 C24 C23 1.381(5) . ?
 C48 C49 1.369(9) . ?
 C48 C53 1.397(8) . ?
 C20 H20 0.9500 . ?
 C20 C21 1.374(5) . ?
 C21 H21 0.9500 . ?
 C21 C22 1.382(5) . ?
 C25 C30 1.398(5) . ?
 C23 H23 0.9500 . ?
 C23 C22 1.387(5) . ?
 C49 H49 0.9500 . ?
 C49 C50 1.384(8) . ?
 C18 H18 0.9500 . ?
 C18 C17 1.389(5) . ?
 C60 C67 1.399(6) . ?
 C60 C68 1.342(7) . ?
 C60 C61 1.503(9) . ?
 C60 C65 1.397(9) . ?
 C60 C71 1.328(11) . ?
 C60 C72 1.335(12) . ?
 C14 H14 0.9500 . ?
 C14 C15 1.388(5) . ?
 C54 C55 1.387(5) . ?
 C54 C59 1.400(5) . ?
 C42 C43 1.389(4) . ?
 C42 C47 1.394(5) . ?
 C43 H43 0.9500 . ?
 C43 C44 1.389(5) . ?
 C44 H44 0.9500 . ?
 C44 C45 1.375(5) . ?
 C55 H55 0.9500 . ?
 C55 C56 1.378(6) . ?
 C27 H27 0.9500 . ?
 C27 C28 1.384(5) . ?
 C31 C36 1.383(9) . ?
 C31 C32 1.408(8) . ?
 C22 H22 0.9500 . ?
 C1 C2 1.350(5) . ?
 C17 H17 0.9500 . ?
 C17 C16 1.391(6) . ?
 C50 H50 0.9500 . ?
 C50 C51 1.348(10) . ?
 C28 H28 0.9500 . ?
 C28 C29 1.374(6) . ?
 C16 H16 0.9500 . ?
 C16 C15 1.376(6) . ?
 C51 H51 0.9500 . ?
 C51 C52 1.411(10) . ?
 C5 C4 1.357(5) . ?
 C29 H29 0.9500 . ?
 C29 C30 1.379(5) . ?
 C45 H45 0.9500 . ?
 C45 C46 1.389(5) . ?
 C30 H30 0.9500 . ?
 C56 H56 0.9500 . ?
 C56 C57 1.380(5) . ?
 C47 H47 0.9500 . ?
 C47 C46 1.383(4) . ?
 C46 H46 0.9500 . ?
 C15 H15 0.9500 . ?
 C36 H36 0.9500 . ?
 C36 C35 1.380(7) . ?
 C57 H57 0.9500 . ?
 C57 C58 1.388(6) . ?
 C11 C10 1.354(10) . ?
 C74 H74A 0.9800 . ?
 C74 H74B 0.9800 . ?
 C74 H74C 0.9800 . ?
 C58 H58 0.9500 . ?
 C58 C59 1.369(6) . ?
 C59 H59 0.9500 . ?
 C63 H63 0.9500 . ?
 C63 H63A 0.9500 . ?
 C63 H63B 0.9500 . ?
 C63 C66 1.454(7) . ?
 C63 C69 1.377(7) . ?
 C63 C64 1.289(9) . ?
 C63 C62 1.347(10) . ?
 C63 C70 1.454(11) . ?
 C63 C73 1.441(12) . ?
 C35 H35 0.9500 . ?
 C35 C34 1.383(10) . ?
 C32 H32 0.9500 . ?
 C32 C33 1.382(8) . ?
 C34 H34 0.9500 . ?
 C34 C33 1.405(8) . ?
 C53 H53 0.9500 . ?
 C53 C52 1.402(9) . ?
 C33 H33 0.9500 . ?
 C52 H52 0.9500 . ?
 O1 C12 1.212(9) . ?
 C67 H67 0.9500 . ?
 C67 C66 1.388(7) . ?
 C68 H68 0.9500 . ?
 C68 C69 1.375(7) . ?
 C66 H66 0.9500 . ?
 C69 H69 0.9500 . ?
 C61 H61 0.9500 . ?
 C61 C62 1.408(8) . ?
 C64 H64 0.9500 . ?
 C64 C65 1.374(8) . ?
 C62 H62 0.9500 . ?
 C65 H65 0.9500 . ?
 C71 H71 0.9500 . ?
 C71 C70 1.391(8) . ?
 C70 H70 0.9500 . ?
 C73 H73 0.9500 . ?
 C73 C72 1.386(8) . ?
 C72 H72 0.9500 . ?
 O1A C9 1.224(8) . ?
 C9 S3A 1.756(8) . ?
 C9 S4A 1.759(8) . ?
 S3A C8 1.762(7) . ?
 S4A C7 1.770(7) . ?
 C8 C7 1.338(10) . ?
 C41 H41 0.9500 . ?
 C41 C40 1.375(12) . ?
 C41 C44A 1.360(13) . ?
 C40 H40 0.9500 . ?
 C40 C39 1.380(12) . ?
 C39 H39 0.9500 . ?
 C39 C38 1.360(17) . ?
 C37 H37 0.9500 . ?
 C37 C38 1.426(11) . ?
 C37 C44A 1.353(14) . ?
 C38 H38 0.9500 . ?
 C76 H76 0.9500 . ?
 C76 C77 1.370(14) . ?
 C76 C75 1.374(10) . ?
 C77 H77 0.9500 . ?
 C77 C78 1.357(11) . ?
 C78 H78 0.9500 . ?
 C78 C79 1.385(11) . ?
 C79 H79 0.9500 . ?
 C79 C80 1.380(11) . ?
 C80 H80 0.9500 . ?
 C80 C75 1.389(11) . ?

loop_
  _geom_angle_atom_site_label_1
  _geom_angle_atom_site_label_2
  _geom_angle_atom_site_label_3
  _geom_angle
  _geom_angle_site_symmetry_1
  _geom_angle_site_symmetry_3
  _geom_angle_publ_flag
 S6 V1 S5 85.26(4) . . ?
 S6 V1 S10 161.05(4) . . ?
 S6 V1 S1 111.90(4) . . ?
 S2 V1 S6 85.43(3) . . ?
 S2 V1 S9 83.48(4) . . ?
 S2 V1 S5 164.47(4) . . ?
 S2 V1 S10 103.33(4) . . ?
 S2 V1 S1 84.84(4) . . ?
 S9 V1 S6 79.76(3) . . ?
 S9 V1 S5 107.01(4) . . ?
 S9 V1 S10 84.53(3) . . ?
 S9 V1 S1 162.76(5) . . ?
 S5 V1 S10 89.30(4) . . ?
 S1 V1 S5 87.14(4) . . ?
 S1 V1 S10 85.87(4) . . ?
 C4 S6 V1 103.08(13) . . ?
 C19 P1 C13 108.44(14) . . ?
 C19 P1 C25 110.48(15) . . ?
 C19 P1 C31 106.2(2) . . ?
 C13 P1 C25 108.60(15) . . ?
 C13 P1 C31 109.5(2) . . ?
 C25 P1 C31 113.5(3) . . ?
 C44A P1 C19 114.8(4) . . ?
 C44A P1 C13 111.0(4) . . ?
 C44A P1 C25 103.3(4) . . ?
 C11 S2 V1 110.7(3) . . ?
 C7 S2 V1 100.5(2) . . ?
 C2 S9 V1 104.85(12) . . ?
 C5 S5 V1 103.00(12) . . ?
 C60 P2 C48 109.1(2) . . ?
 C60 P2 C75 105.2(3) . . ?
 C54 P2 C48 104.5(3) . . ?
 C54 P2 C60 111.64(16) . . ?
 C54 P2 C42 109.96(16) . . ?
 C54 P2 C75 115.4(3) . . ?
 C42 P2 C48 114.8(2) . . ?
 C42 P2 C60 106.90(16) . . ?
 C42 P2 C75 107.4(4) . . ?
 C1 S10 V1 104.79(12) . . ?
 C1 S11 C3 96.96(18) . . ?
 C4 S8 C6 96.4(2) . . ?
 C2 S12 C3 96.37(18) . . ?
 C6 S7 C5 97.29(19) . . ?
 C10 S1 V1 100.1(2) . . ?
 C8 S1 V1 109.1(3) . . ?
 C11 S4 C12 97.2(4) . . ?
 C10 S3 C12 96.1(4) . . ?
 C74 O4 H4 114(3) . . ?
 C24 C19 P1 119.3(2) . . ?
 C24 C19 C20 119.9(3) . . ?
 C20 C19 P1 120.9(2) . . ?
 C25 C26 H26 120.2 . . ?
 C27 C26 H26 120.2 . . ?
 C27 C26 C25 119.6(3) . . ?
 C18 C13 P1 120.1(3) . . ?
 C18 C13 C14 120.4(3) . . ?
 C14 C13 P1 119.2(3) . . ?
 C19 C24 H24 120.0 . . ?
 C23 C24 C19 119.9(3) . . ?
 C23 C24 H24 120.0 . . ?
 C49 C48 P2 125.5(5) . . ?
 C49 C48 C53 120.5(5) . . ?
 C53 C48 P2 113.9(5) . . ?
 C19 C20 H20 120.1 . . ?
 C21 C20 C19 119.7(3) . . ?
 C21 C20 H20 120.1 . . ?
 C20 C21 H21 119.8 . . ?
 C20 C21 C22 120.5(3) . . ?
 C22 C21 H21 119.8 . . ?
 C26 C25 P1 119.8(2) . . ?
 C26 C25 C30 120.2(3) . . ?
 C30 C25 P1 120.0(3) . . ?
 C24 C23 H23 120.0 . . ?
 C24 C23 C22 120.0(3) . . ?
 C22 C23 H23 120.0 . . ?
 C48 C49 H49 119.4 . . ?
 C48 C49 C50 121.2(6) . . ?
 C50 C49 H49 119.4 . . ?
 C13 C18 H18 120.1 . . ?
 C13 C18 C17 119.7(3) . . ?
 C17 C18 H18 120.1 . . ?
 C67 C60 P2 118.3(3) . . ?
 C68 C60 P2 118.3(3) . . ?
 C68 C60 C67 123.4(5) . . ?
 C61 C60 P2 122.5(4) . . ?
 C65 C60 P2 127.0(4) . . ?
 C65 C60 C61 110.3(6) . . ?
 C71 C60 P2 116.0(5) . . ?
 C71 C60 C72 124.7(9) . . ?
 C72 C60 P2 118.6(6) . . ?
 C13 C14 H14 120.4 . . ?
 C15 C14 C13 119.2(3) . . ?
 C15 C14 H14 120.4 . . ?
 C55 C54 P2 121.9(3) . . ?
 C55 C54 C59 118.8(4) . . ?
 C59 C54 P2 119.1(3) . . ?
 C43 C42 P2 122.6(3) . . ?
 C43 C42 C47 119.6(3) . . ?
 C47 C42 P2 117.8(2) . . ?
 C42 C43 H43 120.2 . . ?
 C44 C43 C42 119.5(3) . . ?
 C44 C43 H43 120.2 . . ?
 C43 C44 H44 119.7 . . ?
 C45 C44 C43 120.5(3) . . ?
 C45 C44 H44 119.7 . . ?
 C54 C55 H55 120.1 . . ?
 C56 C55 C54 119.8(3) . . ?
 C56 C55 H55 120.1 . . ?
 C26 C27 H27 120.1 . . ?
 C28 C27 C26 119.8(3) . . ?
 C28 C27 H27 120.1 . . ?
 C36 C31 P1 122.3(4) . . ?
 C36 C31 C32 119.9(6) . . ?
 C32 C31 P1 117.8(5) . . ?
 C21 C22 C23 120.0(3) . . ?
 C21 C22 H22 120.0 . . ?
 C23 C22 H22 120.0 . . ?
 S10 C1 S11 121.3(2) . . ?
 C2 C1 S10 121.8(3) . . ?
 C2 C1 S11 116.8(3) . . ?
 C18 C17 H17 120.1 . . ?
 C18 C17 C16 119.8(4) . . ?
 C16 C17 H17 120.1 . . ?
 C49 C50 H50 120.1 . . ?
 C51 C50 C49 119.8(7) . . ?
 C51 C50 H50 120.1 . . ?
 C27 C28 H28 119.8 . . ?
 C29 C28 C27 120.4(3) . . ?
 C29 C28 H28 119.8 . . ?
 C17 C16 H16 119.8 . . ?
 C15 C16 C17 120.4(3) . . ?
 C15 C16 H16 119.8 . . ?
 C50 C51 H51 119.8 . . ?
 C50 C51 C52 120.5(6) . . ?
 C52 C51 H51 119.8 . . ?
 S9 C2 S12 119.4(2) . . ?
 C1 C2 S9 123.0(3) . . ?
 C1 C2 S12 117.6(3) . . ?
 S5 C5 S7 120.2(2) . . ?
 C4 C5 S5 122.8(3) . . ?
 C4 C5 S7 117.0(3) . . ?
 S6 C4 S8 120.9(2) . . ?
 C5 C4 S6 122.4(3) . . ?
 C5 C4 S8 116.7(3) . . ?
 C28 C29 H29 119.6 . . ?
 C28 C29 C30 120.8(3) . . ?
 C30 C29 H29 119.6 . . ?
 C44 C45 H45 119.8 . . ?
 C44 C45 C46 120.4(3) . . ?
 C46 C45 H45 119.8 . . ?
 C25 C30 H30 120.4 . . ?
 C29 C30 C25 119.1(4) . . ?
 C29 C30 H30 120.4 . . ?
 C55 C56 H56 119.5 . . ?
 C55 C56 C57 121.0(4) . . ?
 C57 C56 H56 119.5 . . ?
 C42 C47 H47 119.7 . . ?
 C46 C47 C42 120.6(3) . . ?
 C46 C47 H47 119.7 . . ?
 C45 C46 H46 120.3 . . ?
 C47 C46 C45 119.3(3) . . ?
 C47 C46 H46 120.3 . . ?
 C14 C15 H15 119.8 . . ?
 C16 C15 C14 120.4(4) . . ?
 C16 C15 H15 119.8 . . ?
 C31 C36 H36 120.2 . . ?
 C35 C36 C31 119.6(7) . . ?
 C35 C36 H36 120.2 . . ?
 C56 C57 H57 120.3 . . ?
 C56 C57 C58 119.5(4) . . ?
 C58 C57 H57 120.3 . . ?
 S2 C11 S4 123.5(5) . . ?
 C10 C11 S2 120.1(6) . . ?
 C10 C11 S4 116.3(6) . . ?
 O4 C74 H74A 109.5 . . ?
 O4 C74 H74B 109.5 . . ?
 O4 C74 H74C 109.5 . . ?
 H74A C74 H74B 109.5 . . ?
 H74A C74 H74C 109.5 . . ?
 H74B C74 H74C 109.5 . . ?
 S11 C3 S12 112.3(2) . . ?
 O3 C3 S11 123.8(3) . . ?
 O3 C3 S12 123.9(3) . . ?
 C57 C58 H58 120.1 . . ?
 C59 C58 C57 119.8(4) . . ?
 C59 C58 H58 120.1 . . ?
 C54 C59 H59 119.5 . . ?
 C58 C59 C54 121.0(4) . . ?
 C58 C59 H59 119.5 . . ?
 S7 C6 S8 112.3(2) . . ?
 O2 C6 S8 123.8(4) . . ?
 O2 C6 S7 123.9(4) . . ?
 S3 C10 S1 119.8(5) . . ?
 C11 C10 S1 122.2(5) . . ?
 C11 C10 S3 117.9(6) . . ?
 C66 C63 H63 121.5 . . ?
 C69 C63 H63 121.5 . . ?
 C69 C63 C66 116.9(5) . . ?
 C64 C63 H63A 114.9 . . ?
 C64 C63 C62 130.2(8) . . ?
 C62 C63 H63A 114.9 . . ?
 C70 C63 H63B 122.5 . . ?
 C73 C63 H63B 122.5 . . ?
 C73 C63 C70 114.9(8) . . ?
 C36 C35 H35 119.5 . . ?
 C36 C35 C34 121.1(7) . . ?
 C34 C35 H35 119.5 . . ?
 C31 C32 H32 119.9 . . ?
 C33 C32 C31 120.2(6) . . ?
 C33 C32 H32 119.9 . . ?
 C35 C34 H34 120.1 . . ?
 C35 C34 C33 119.7(6) . . ?
 C33 C34 H34 120.1 . . ?
 C48 C53 H53 121.0 . . ?
 C48 C53 C52 117.9(6) . . ?
 C52 C53 H53 121.0 . . ?
 C32 C33 C34 119.3(6) . . ?
 C32 C33 H33 120.4 . . ?
 C34 C33 H33 120.4 . . ?
 C51 C52 H52 120.0 . . ?
 C53 C52 C51 120.0(6) . . ?
 C53 C52 H52 120.0 . . ?
 S4 C12 S3 112.4(5) . . ?
 O1 C12 S4 122.2(8) . . ?
 O1 C12 S3 124.8(7) . . ?
 C60 C67 H67 121.5 . . ?
 C66 C67 C60 116.9(5) . . ?
 C66 C67 H67 121.5 . . ?
 C60 C68 H68 120.3 . . ?
 C60 C68 C69 119.3(6) . . ?
 C69 C68 H68 120.3 . . ?
 C63 C66 H66 119.5 . . ?
 C67 C66 C63 120.9(5) . . ?
 C67 C66 H66 119.5 . . ?
 C63 C69 H69 118.9 . . ?
 C68 C69 C63 122.1(6) . . ?
 C68 C69 H69 118.9 . . ?
 C60 C61 H61 118.5 . . ?
 C62 C61 C60 123.1(8) . . ?
 C62 C61 H61 118.5 . . ?
 C63 C64 H64 122.2 . . ?
 C63 C64 C65 115.6(8) . . ?
 C65 C64 H64 122.2 . . ?
 C63 C62 C61 113.6(8) . . ?
 C63 C62 H62 123.2 . . ?
 C61 C62 H62 123.2 . . ?
 C60 C65 H65 116.6 . . ?
 C64 C65 C60 126.9(8) . . ?
 C64 C65 H65 116.6 . . ?
 C60 C71 H71 120.8 . . ?
 C60 C71 C70 118.5(11) . . ?
 C70 C71 H71 120.8 . . ?
 C63 C70 H70 119.7 . . ?
 C71 C70 C63 120.6(11) . . ?
 C71 C70 H70 119.7 . . ?
 C63 C73 H73 119.7 . . ?
 C72 C73 C63 120.5(11) . . ?
 C72 C73 H73 119.7 . . ?
 C60 C72 C73 119.1(12) . . ?
 C60 C72 H72 120.5 . . ?
 C73 C72 H72 120.5 . . ?
 O1A C9 S3A 125.2(7) . . ?
 O1A C9 S4A 122.0(7) . . ?
 S3A C9 S4A 112.8(4) . . ?
 C9 S3A C8 98.6(4) . . ?
 C9 S4A C7 95.0(4) . . ?
 S1 C8 S3A 125.6(5) . . ?
 C7 C8 S1 121.1(5) . . ?
 C7 C8 S3A 113.3(5) . . ?
 S4A C7 S2 115.3(4) . . ?
 C8 C7 S2 124.4(5) . . ?
 C8 C7 S4A 120.3(5) . . ?
 C40 C41 H41 119.5 . . ?
 C44A C41 H41 119.5 . . ?
 C44A C41 C40 120.9(11) . . ?
 C41 C40 H40 120.9 . . ?
 C41 C40 C39 118.1(11) . . ?
 C39 C40 H40 120.9 . . ?
 C40 C39 H39 118.5 . . ?
 C38 C39 C40 123.0(10) . . ?
 C38 C39 H39 118.5 . . ?
 C38 C37 H37 119.8 . . ?
 C44A C37 H37 119.8 . . ?
 C44A C37 C38 120.4(12) . . ?
 C39 C38 C37 116.8(11) . . ?
 C39 C38 H38 121.6 . . ?
 C37 C38 H38 121.6 . . ?
 C41 C44A P1 121.6(8) . . ?
 C37 C44A P1 117.8(8) . . ?
 C37 C44A C41 120.6(10) . . ?
 C77 C76 H76 118.5 . . ?
 C77 C76 C75 123.0(8) . . ?
 C75 C76 H76 118.5 . . ?
 C76 C77 H77 120.2 . . ?
 C78 C77 C76 119.6(10) . . ?
 C78 C77 H77 120.2 . . ?
 C77 C78 H78 120.5 . . ?
 C77 C78 C79 119.0(10) . . ?
 C79 C78 H78 120.5 . . ?
 C78 C79 H79 119.6 . . ?
 C80 C79 C78 120.7(11) . . ?
 C80 C79 H79 119.6 . . ?
 C79 C80 H80 119.9 . . ?
 C79 C80 C75 120.3(10) . . ?
 C75 C80 H80 119.9 . . ?
 C76 C75 P2 129.6(7) . . ?
 C76 C75 C80 116.8(8) . . ?
 C80 C75 P2 113.6(6) . . ?

loop_
  _geom_torsion_atom_site_label_1
  _geom_torsion_atom_site_label_2
  _geom_torsion_atom_site_label_3
  _geom_torsion_atom_site_label_4
  _geom_torsion
  _geom_torsion_site_symmetry_1
  _geom_torsion_site_symmetry_2
  _geom_torsion_site_symmetry_3
  _geom_torsion_site_symmetry_4
  _geom_torsion_publ_flag
 V1 S6 C4 S8 -163.41(16) . . . . ?
 V1 S6 C4 C5 15.5(3) . . . . ?
 V1 S2 C11 S4 171.9(5) . . . . ?
 V1 S2 C11 C10 -5.5(8) . . . . ?
 V1 S2 C7 S4A 177.2(3) . . . . ?
 V1 S2 C7 C8 -4.2(7) . . . . ?
 V1 S9 C2 S12 -172.51(17) . . . . ?
 V1 S9 C2 C1 9.0(3) . . . . ?
 V1 S5 C5 S7 165.87(17) . . . . ?
 V1 S5 C5 C4 -11.0(3) . . . . ?
 V1 S10 C1 S11 173.06(17) . . . . ?
 V1 S10 C1 C2 -5.4(3) . . . . ?
 V1 S1 C8 S3A -177.5(4) . . . . ?
 V1 S1 C8 C7 -0.1(8) . . . . ?
 P1 C19 C24 C23 178.2(2) . . . . ?
 P1 C19 C20 C21 -178.1(2) . . . . ?
 P1 C13 C18 C17 -173.3(3) . . . . ?
 P1 C13 C14 C15 172.5(3) . . . . ?
 P1 C25 C30 C29 -179.6(3) . . . . ?
 P1 C31 C36 C35 -177.9(5) . . . . ?
 P1 C31 C32 C33 178.4(5) . . . . ?
 S2 C11 C10 S1 -5.8(10) . . . . ?
 S2 C11 C10 S3 178.0(5) . . . . ?
 S5 C5 C4 S6 -3.2(4) . . . . ?
 S5 C5 C4 S8 175.78(18) . . . . ?
 P2 C48 C49 C50 -178.2(5) . . . . ?
 P2 C48 C53 C52 179.6(5) . . . . ?
 P2 C60 C67 C66 179.6(6) . . . . ?
 P2 C60 C68 C69 -175.8(7) . . . . ?
 P2 C60 C61 C62 178.7(11) . . . . ?
 P2 C60 C65 C64 -179.6(9) . . . . ?
 P2 C60 C71 C70 -175.4(12) . . . . ?
 P2 C60 C72 C73 -179.2(19) . . . . ?
 P2 C54 C55 C56 174.3(3) . . . . ?
 P2 C54 C59 C58 -174.6(3) . . . . ?
 P2 C42 C43 C44 -179.1(3) . . . . ?
 P2 C42 C47 C46 -179.9(3) . . . . ?
 S10 C1 C2 S9 -2.5(4) . . . . ?
 S10 C1 C2 S12 178.96(19) . . . . ?
 S11 C1 C2 S9 178.97(19) . . . . ?
 S11 C1 C2 S12 0.5(4) . . . . ?
 S7 C5 C4 S6 179.78(18) . . . . ?
 S7 C5 C4 S8 -1.2(4) . . . . ?
 S1 C8 C7 S2 3.2(10) . . . . ?
 S1 C8 C7 S4A -178.3(4) . . . . ?
 S4 C11 C10 S1 176.6(5) . . . . ?
 S4 C11 C10 S3 0.4(10) . . . . ?
 C19 P1 C13 C18 86.7(3) . . . . ?
 C19 P1 C13 C14 -86.4(3) . . . . ?
 C19 P1 C25 C26 17.6(3) . . . . ?
 C19 P1 C25 C30 -163.0(3) . . . . ?
 C19 P1 C31 C36 18.0(6) . . . . ?
 C19 P1 C31 C32 -163.4(5) . . . . ?
 C19 P1 C44A C41 -150.9(9) . . . . ?
 C19 P1 C44A C37 29.2(11) . . . . ?
 C19 C24 C23 C22 -0.3(5) . . . . ?
 C19 C20 C21 C22 0.0(5) . . . . ?
 C26 C25 C30 C29 -0.2(5) . . . . ?
 C26 C27 C28 C29 -1.5(5) . . . . ?
 C13 P1 C19 C24 -11.8(3) . . . . ?
 C13 P1 C19 C20 167.0(3) . . . . ?
 C13 P1 C25 C26 136.4(3) . . . . ?
 C13 P1 C25 C30 -44.2(3) . . . . ?
 C13 P1 C31 C36 -98.9(6) . . . . ?
 C13 P1 C31 C32 79.7(5) . . . . ?
 C13 P1 C44A C41 85.7(10) . . . . ?
 C13 P1 C44A C37 -94.2(10) . . . . ?
 C13 C18 C17 C16 1.2(6) . . . . ?
 C13 C14 C15 C16 0.6(5) . . . . ?
 C24 C19 C20 C21 0.7(5) . . . . ?
 C24 C23 C22 C21 1.0(5) . . . . ?
 C48 P2 C60 C67 -94.9(5) . . . . ?
 C48 P2 C60 C68 88.3(6) . . . . ?
 C48 P2 C54 C55 -118.0(3) . . . . ?
 C48 P2 C54 C59 57.0(4) . . . . ?
 C48 P2 C42 C43 -3.3(4) . . . . ?
 C48 P2 C42 C47 177.8(4) . . . . ?
 C48 C49 C50 C51 -0.6(10) . . . . ?
 C48 C53 C52 C51 -1.5(10) . . . . ?
 C20 C19 C24 C23 -0.6(5) . . . . ?
 C20 C21 C22 C23 -0.9(5) . . . . ?
 C25 P1 C19 C24 107.1(3) . . . . ?
 C25 P1 C19 C20 -74.1(3) . . . . ?
 C25 P1 C13 C18 -33.4(3) . . . . ?
 C25 P1 C13 C14 153.5(3) . . . . ?
 C25 P1 C31 C36 139.6(5) . . . . ?
 C25 P1 C31 C32 -41.8(6) . . . . ?
 C25 P1 C44A C41 -30.5(11) . . . . ?
 C25 P1 C44A C37 149.6(9) . . . . ?
 C25 C26 C27 C28 -0.9(5) . . . . ?
 C49 C48 C53 C52 3.4(10) . . . . ?
 C49 C50 C51 C52 2.5(11) . . . . ?
 C18 C13 C14 C15 -0.6(5) . . . . ?
 C18 C17 C16 C15 -1.2(6) . . . . ?
 C60 P2 C48 C49 131.3(5) . . . . ?
 C60 P2 C48 C53 -44.8(5) . . . . ?
 C60 P2 C54 C55 124.2(3) . . . . ?
 C60 P2 C54 C59 -60.8(4) . . . . ?
 C60 P2 C42 C43 117.8(3) . . . . ?
 C60 P2 C42 C47 -61.1(4) . . . . ?
 C60 P2 C75 C76 -60.6(11) . . . . ?
 C60 P2 C75 C80 121.7(9) . . . . ?
 C60 C67 C66 C63 -0.1(12) . . . . ?
 C60 C68 C69 C63 -7.5(14) . . . . ?
 C60 C61 C62 C63 1(2) . . . . ?
 C60 C71 C70 C63 -7(2) . . . . ?
 C14 C13 C18 C17 -0.3(5) . . . . ?
 C54 P2 C48 C49 11.8(6) . . . . ?
 C54 P2 C48 C53 -164.3(5) . . . . ?
 C54 P2 C60 C67 20.2(5) . . . . ?
 C54 P2 C60 C68 -156.6(5) . . . . ?
 C54 P2 C60 C61 146.3(7) . . . . ?
 C54 P2 C60 C65 -40.3(7) . . . . ?
 C54 P2 C60 C71 -122.6(9) . . . . ?
 C54 P2 C60 C72 48.4(16) . . . . ?
 C54 P2 C42 C43 -120.8(3) . . . . ?
 C54 P2 C42 C47 60.2(4) . . . . ?
 C54 P2 C75 C76 175.9(9) . . . . ?
 C54 P2 C75 C80 -1.7(10) . . . . ?
 C54 C55 C56 C57 -0.5(5) . . . . ?
 C42 P2 C48 C49 -108.8(6) . . . . ?
 C42 P2 C48 C53 75.2(5) . . . . ?
 C42 P2 C60 C67 140.5(5) . . . . ?
 C42 P2 C60 C68 -36.4(6) . . . . ?
 C42 P2 C60 C61 -93.4(7) . . . . ?
 C42 P2 C60 C65 80.0(6) . . . . ?
 C42 P2 C60 C71 -2.3(10) . . . . ?
 C42 P2 C60 C72 168.7(16) . . . . ?
 C42 P2 C54 C55 5.8(3) . . . . ?
 C42 P2 C54 C59 -179.2(3) . . . . ?
 C42 P2 C75 C76 53.0(11) . . . . ?
 C42 P2 C75 C80 -124.7(9) . . . . ?
 C42 C43 C44 C45 -1.1(6) . . . . ?
 C42 C47 C46 C45 -0.9(7) . . . . ?
 C43 C42 C47 C46 1.1(6) . . . . ?
 C43 C44 C45 C46 1.4(6) . . . . ?
 C44 C45 C46 C47 -0.4(6) . . . . ?
 C55 C54 C59 C58 0.6(6) . . . . ?
 C55 C56 C57 C58 1.8(6) . . . . ?
 C27 C26 C25 P1 -178.9(2) . . . . ?
 C27 C26 C25 C30 1.7(5) . . . . ?
 C27 C28 C29 C30 3.1(6) . . . . ?
 C31 P1 C19 C24 -129.4(3) . . . . ?
 C31 P1 C19 C20 49.4(4) . . . . ?
 C31 P1 C13 C18 -157.8(4) . . . . ?
 C31 P1 C13 C14 29.1(4) . . . . ?
 C31 P1 C25 C26 -101.6(3) . . . . ?
 C31 P1 C25 C30 77.8(4) . . . . ?
 C31 C36 C35 C34 -0.2(10) . . . . ?
 C31 C32 C33 C34 -0.9(9) . . . . ?
 C1 S11 C3 S12 -0.5(2) . . . . ?
 C1 S11 C3 O3 179.8(3) . . . . ?
 C17 C16 C15 C14 0.3(6) . . . . ?
 C50 C51 C52 C53 -1.4(11) . . . . ?
 C28 C29 C30 C25 -2.3(6) . . . . ?
 C2 S12 C3 S11 0.7(2) . . . . ?
 C2 S12 C3 O3 -179.7(3) . . . . ?
 C5 S7 C6 S8 -5.5(3) . . . . ?
 C5 S7 C6 O2 174.9(4) . . . . ?
 C4 S8 C6 S7 5.0(3) . . . . ?
 C4 S8 C6 O2 -175.4(4) . . . . ?
 C56 C57 C58 C59 -2.0(6) . . . . ?
 C47 C42 C43 C44 -0.1(6) . . . . ?
 C36 C31 C32 C33 -2.9(10) . . . . ?
 C36 C35 C34 C33 -3.7(9) . . . . ?
 C57 C58 C59 C54 0.8(7) . . . . ?
 C11 S4 C12 S3 2.9(7) . . . . ?
 C11 S4 C12 O1 174.8(10) . . . . ?
 C3 S11 C1 S10 -178.5(2) . . . . ?
 C3 S11 C1 C2 0.1(3) . . . . ?
 C3 S12 C2 S9 -179.3(2) . . . . ?
 C3 S12 C2 C1 -0.7(3) . . . . ?
 C59 C54 C55 C56 -0.7(5) . . . . ?
 C6 S8 C4 S6 176.7(2) . . . . ?
 C6 S8 C4 C5 -2.3(3) . . . . ?
 C6 S7 C5 S5 -172.9(2) . . . . ?
 C6 S7 C5 C4 4.2(3) . . . . ?
 C10 S3 C12 S4 -2.7(7) . . . . ?
 C10 S3 C12 O1 -174.4(10) . . . . ?
 C63 C64 C65 C60 1.5(17) . . . . ?
 C63 C73 C72 C60 -4(4) . . . . ?
 C35 C34 C33 C32 4.2(9) . . . . ?
 C32 C31 C36 C35 3.5(10) . . . . ?
 C53 C48 C49 C50 -2.4(10) . . . . ?
 C12 S4 C11 S2 -179.6(6) . . . . ?
 C12 S4 C11 C10 -2.1(8) . . . . ?
 C12 S3 C10 S1 -174.8(5) . . . . ?
 C12 S3 C10 C11 1.4(8) . . . . ?
 C67 C60 C68 C69 7.6(12) . . . . ?
 C68 C60 C67 C66 -3.8(11) . . . . ?
 C66 C63 C69 C68 3.7(12) . . . . ?
 C69 C63 C66 C67 0.0(12) . . . . ?
 C61 C60 C65 C64 -5.5(14) . . . . ?
 C64 C63 C62 C61 -5.9(19) . . . . ?
 C62 C63 C64 C65 5.1(17) . . . . ?
 C65 C60 C61 C62 4.3(16) . . . . ?
 C71 C60 C72 C73 -9(3) . . . . ?
 C70 C63 C73 C72 10(3) . . . . ?
 C73 C63 C70 C71 -5(2) . . . . ?
 C72 C60 C71 C70 14(2) . . . . ?
 O1A C9 S3A C8 -179.7(9) . . . . ?
 O1A C9 S4A C7 179.4(8) . . . . ?
 C9 S3A C8 S1 177.5(6) . . . . ?
 C9 S3A C8 C7 0.0(7) . . . . ?
 C9 S4A C7 S2 179.6(4) . . . . ?
 C9 S4A C7 C8 0.9(7) . . . . ?
 S3A C9 S4A C7 -0.8(5) . . . . ?
 S3A C8 C7 S2 -179.2(4) . . . . ?
 S3A C8 C7 S4A -0.7(9) . . . . ?
 S4A C9 S3A C8 0.6(5) . . . . ?
 C41 C40 C39 C38 -1.3(17) . . . . ?
 C40 C41 C44A P1 -176.8(10) . . . . ?
 C40 C41 C44A C37 3.1(19) . . . . ?
 C40 C39 C38 C37 3.3(16) . . . . ?
 C38 C37 C44A P1 178.9(9) . . . . ?
 C38 C37 C44A C41 -1.1(18) . . . . ?
 C44A P1 C19 C24 -136.6(5) . . . . ?
 C44A P1 C19 C20 42.3(5) . . . . ?
 C44A P1 C13 C18 -146.3(5) . . . . ?
 C44A P1 C13 C14 40.6(5) . . . . ?
 C44A P1 C25 C26 -105.7(5) . . . . ?
 C44A P1 C25 C30 73.7(5) . . . . ?
 C44A C41 C40 C39 -2.0(18) . . . . ?
 C44A C37 C38 C39 -2.0(17) . . . . ?
 C76 C77 C78 C79 7.6(17) . . . . ?
 C77 C76 C75 P2 177.4(9) . . . . ?
 C77 C76 C75 C80 -5.0(16) . . . . ?
 C77 C78 C79 C80 -6.2(19) . . . . ?
 C78 C79 C80 C75 -1(2) . . . . ?
 C79 C80 C75 P2 -175.6(10) . . . . ?
 C79 C80 C75 C76 6.4(18) . . . . ?
 C75 P2 C60 C61 20.5(8) . . . . ?
 C75 P2 C60 C65 -166.1(7) . . . . ?
 C75 P2 C54 C55 -115.8(5) . . . . ?
 C75 P2 C54 C59 59.2(5) . . . . ?
 C75 P2 C42 C43 5.4(5) . . . . ?
 C75 P2 C42 C47 -173.5(4) . . . . ?
 C75 C76 C77 C78 -2.0(17) . . . . ?

_shelx_SHELXL_version_number      '2014/7'
_iucr_refine_instructions_details
;

    jz4109_0m.res created by SHELXL-2014/7

TITL jz4109_0m_a.res in P-1
REM Old TITL jz4109_0m in P-1 #2
REM SHELXT solution in P-1
REM R1 0.197, Rweak 0.012, Alpha 0.057, Orientation as input
REM Formula found by SHELXT: C74 P2 S12 V
CELL 1.54178 10.6733 13.8411 21.2149 96.429 90.582 110.889
ZERR 4 0.0007 0.0009 0.0014 0.002 0.002 0.002
LATT 1
SFAC C H P S V O
UNIT 80 80 8 80 4 1
SADI C11 C10 C7 C8 C4 C5
SADI C11 S4 S4A C7 C10 S3 S3A C8 C5 S7
SADI S4 C12 C9 S4A C5 S7
SADI S4 C12 C12 S3
SADI S4A C9 C9 S3A
SADI C12 O1 C9 O1A C6 O2
SADI C41 C40 C32 C33 C37 C38 C36 C35
SADI C40 C39 C33 C34 C37 C38 C36 C35
SADI C41 C44A C44A C37
SADI C32 C31 C31 C36
SADI C44A P1 P1 C31
SADI S3 S4 S4A S3A
SADI 0.01 C71 C60 C60 C72
SADI 0.01 C67 C60 C60 C68
SADI 0.01 C62 C63 C63 C64
SADI 0.01 C73 C63 C63 C70
SADI 0.01 C66 C63 C63 C69
SADI 0.01 C69 C67 C66 C68 C71 C73 C70 C72 C65 C62 C58 C55
SADI 0.01 C60 C63 C54 C57
SADI 0.01 C64 C65 C66 C67 C73 C72 C62 C61 C69 C68 C70 C71
SADI 0.01 C61 C60 C60 C65
SADI 0.01 C62 C61 C47 C46
SADI 0.01 C62 C65 C64 C61 C58 C55
SADI 0.01 C80 C79 C78 C77 C76 C75
SADI 0.01 C79 C78 C75 C80 C50 C49
SADI 0.01 C48 P2 P2 C75
SUMP 1 0.005 1 2 1 3 1 4
 
L.S. 30
PLAN  20
TEMP -173.16
BOND $H
LIST 6
MORE -1
CONF
fmap 2
acta
REM <olex2.extras>
REM <HklSrc "%.\\jz4109_0m.hkl">
REM </olex2.extras>
 
WGHT    0.045600    2.508800
FVAR       0.37509   0.45592   0.20933   0.33796   0.42957   0.64312
V1    5    0.568155    0.190313    0.770087    11.00000    0.02967    0.05093 =
         0.02966   -0.00457    0.00153    0.02071
S6    4    0.345756    0.068629    0.772601    11.00000    0.03195    0.05227 =
         0.03149    0.00036    0.00215    0.02079
P1    3    0.198184    0.268126    0.430121    11.00000    0.02962    0.03736 =
         0.02493   -0.00207    0.00246    0.00565
S2    4    0.465901    0.315518    0.765518    11.00000    0.03111    0.04435 =
         0.04917    0.00328    0.01286    0.01615
S9    4    0.506339    0.151529    0.659939    11.00000    0.02843    0.06511 =
         0.03019   -0.00054    0.00184    0.01934
S5    4    0.636061    0.054297    0.799266    11.00000    0.03964    0.06450 =
         0.03518    0.00280    0.00042    0.03034
P2    3   -0.072600    0.178207    0.039916    11.00000    0.03741    0.06286 =
         0.02588    0.00882    0.00834    0.03294
S10   4    0.789878    0.276090    0.736001    11.00000    0.03076    0.05876 =
         0.03990   -0.00862    0.00193    0.01699
S11   4    0.901517    0.340429    0.609941    11.00000    0.03948    0.04904 =
         0.05069   -0.00526    0.01381    0.01122
S8    4    0.234562   -0.167613    0.752509    11.00000    0.05390    0.05513 =
         0.04262   -0.00950   -0.00341    0.02243
S12   4    0.638795    0.228327    0.541629    11.00000    0.04076    0.08758 =
         0.04092    0.01283    0.00779    0.03021
S7    4    0.497904   -0.179642    0.781899    11.00000    0.06983    0.06553 =
         0.04862   -0.00440   -0.00121    0.04303
S1    4    0.653959    0.280967    0.872310    11.00000    0.04580    0.08465 =
         0.04054   -0.01986   -0.00789    0.03311
PART 1
S4    4    0.487164    0.520743    0.829692    51.00000    0.03773    0.04134 =
         0.05939   -0.00946    0.00037    0.01688
S3    4    0.671398    0.506450    0.928214    51.00000    0.05833    0.05741 =
         0.06523   -0.02857   -0.01681    0.02553
 
PART 0
O4    6   -0.060349    0.099659    0.692950    11.00000    0.05116    0.05295 =
         0.08778   -0.00893    0.00937    0.02213
 
O3    6    0.858984    0.337287    0.486544    11.00000    0.05647    0.07803 =
         0.05839    0.02104    0.01943    0.03414
O2    6    0.284654   -0.343647    0.742422    11.00000    0.09997    0.06458 =
         0.07865   -0.01696   -0.00299    0.04285
C19   1    0.039385    0.168378    0.440035    11.00000    0.02675    0.03325 =
         0.03123    0.00165    0.00228    0.01258
C26   1    0.279461    0.106132    0.383889    11.00000    0.02786    0.04644 =
         0.02627   -0.00005    0.00417    0.00975
AFIX  43
H26   2    0.186490    0.064884    0.378672    11.00000   -1.20000
AFIX   0
C13   1    0.254389    0.349647    0.504622    11.00000    0.03000    0.03968 =
         0.02836   -0.00423    0.00387    0.00537
C24   1   -0.004690    0.153958    0.500839    11.00000    0.03697    0.03657 =
         0.02830    0.00258    0.00387    0.01598
AFIX  43
H24   2    0.050067    0.195272    0.536697    11.00000   -1.20000
AFIX   0
 
PART 1
C48   1    0.008589    0.148382    0.106542   -41.00000    0.02904
 
PART 0
C20   1   -0.040793    0.106834    0.387496    11.00000    0.03199    0.04150 =
         0.02895    0.00029   -0.00062    0.01305
AFIX  43
H20   2   -0.010578    0.115880    0.345839    11.00000   -1.20000
AFIX   0
C21   1   -0.163584    0.033127    0.396288    11.00000    0.02699    0.04154 =
         0.04512   -0.00291   -0.00300    0.01023
AFIX  43
H21   2   -0.218168   -0.008813    0.360551    11.00000   -1.20000
AFIX   0
C25   1    0.320998    0.211165    0.407767    11.00000    0.02970    0.04781 =
         0.02730   -0.00193    0.00433    0.00832
C23   1   -0.128217    0.079493    0.509142    11.00000    0.04233    0.04145 =
         0.03939    0.00418    0.01269    0.01402
AFIX  43
H23   2   -0.158304    0.069356    0.550727    11.00000   -1.20000
AFIX   0
 
PART 1
C49   1   -0.024913    0.052319    0.126861   -41.00000    0.03197
AFIX  43
H49   2   -0.094571   -0.005438    0.104403   -41.00000   -1.20000
AFIX   0
 
PART 0
C18   1    0.327383    0.322896    0.549542    11.00000    0.04106    0.05300 =
         0.03387   -0.00693   -0.00267    0.01680
AFIX  43
H18   2    0.356071    0.265711    0.539410    11.00000   -1.20000
AFIX   0
 
C60   1   -0.112472    0.291857    0.064187    11.00000    0.04042    0.06419 =
         0.04400    0.02073    0.01646    0.03319
C14   1    0.211328    0.433532    0.519379    11.00000    0.03815    0.03741 =
         0.03868   -0.00321    0.00022    0.00588
AFIX  43
H14   2    0.162048    0.452274    0.488464    11.00000   -1.20000
AFIX   0
 
C54   1   -0.220443    0.065424    0.020151    11.00000    0.03180    0.07471 =
         0.02563    0.00748    0.00157    0.03036
C42   1    0.026224    0.204533   -0.028071    11.00000    0.03380    0.07064 =
         0.02814    0.00513    0.00507    0.02953
C43   1    0.157626    0.207378   -0.028538    11.00000    0.03027    0.05412 =
         0.03926   -0.00433   -0.00121    0.02180
AFIX  43
H43   2    0.198234    0.194083    0.007939    11.00000   -1.20000
AFIX   0
C44   1    0.229216    0.229788   -0.082680    11.00000    0.02702    0.05709 =
         0.04746   -0.00457    0.00573    0.01919
AFIX  43
H44   2    0.319619    0.233006   -0.082878    11.00000   -1.20000
AFIX   0
C55   1   -0.241682    0.005288   -0.038579    11.00000    0.04988    0.06406 =
         0.02870    0.00868    0.00782    0.03749
AFIX  43
H55   2   -0.180745    0.027073   -0.070993    11.00000   -1.20000
AFIX   0
 
C27   1    0.374656    0.062080    0.367764    11.00000    0.03685    0.05704 =
         0.03005   -0.00225    0.00412    0.01763
AFIX  43
H27   2    0.347138   -0.009775    0.351995    11.00000   -1.20000
AFIX   0
PART 1
C31   1    0.166259    0.345267    0.370492    61.00000    0.03211
PART 0
C22   1   -0.208304    0.019532    0.456741    11.00000    0.02764    0.04029 =
         0.05497    0.00380    0.00832    0.00864
AFIX  43
H22   2   -0.293906   -0.030890    0.462398    11.00000   -1.20000
AFIX   0
 
C1    1    0.768557    0.273928    0.654752    11.00000    0.03256    0.04296 =
         0.04323   -0.00183    0.00991    0.01830
C17   1    0.358380    0.380048    0.609409    11.00000    0.04418    0.06423 =
         0.03253   -0.00546   -0.00952    0.01166
AFIX  43
H17   2    0.409808    0.362886    0.640116    11.00000   -1.20000
AFIX   0
 
PART 1
C50   1    0.040808    0.037777    0.179514   -41.00000    0.03494
AFIX  43
H50   2    0.015676   -0.029293    0.193204   -41.00000   -1.20000
AFIX   0
 
PART 0
C28   1    0.509893    0.123080    0.374704    11.00000    0.03353    0.07304 =
         0.03490   -0.00720    0.00549    0.02153
AFIX  43
H28   2    0.575134    0.092502    0.364645    11.00000   -1.20000
AFIX   0
C16   1    0.313960    0.462481    0.624313    11.00000    0.04118    0.05573 =
         0.03529   -0.01229    0.00029    0.00342
AFIX  43
H16   2    0.333783    0.500713    0.665540    11.00000   -1.20000
AFIX   0
 
PART 1
C51   1    0.140591    0.119102    0.211298   -41.00000    0.04038
AFIX  43
H51   2    0.188059    0.108591    0.246429   -41.00000   -1.20000
AFIX   0
 
PART 0
C2    1    0.648344    0.223092    0.623226    11.00000    0.03651    0.05897 =
         0.03700   -0.00030    0.00566    0.02711
C5    1    0.490703   -0.054963    0.784482    11.00000    0.05069    0.05758 =
         0.02851   -0.00085    0.00233    0.03161
C4    1    0.368959   -0.049170    0.771646    11.00000    0.04596    0.05659 =
         0.02409   -0.00439    0.00087    0.02394
 
C29   1    0.550312    0.227618    0.396061    11.00000    0.02887    0.07917 =
         0.03941   -0.01038    0.00578    0.00844
AFIX  43
H29   2    0.643157    0.269383    0.398605    11.00000   -1.20000
AFIX   0
 
C45   1    0.170325    0.247357   -0.136003    11.00000    0.03254    0.06281 =
         0.03522   -0.00379    0.01144    0.00882
AFIX  43
H45   2    0.219635    0.261125   -0.173081    11.00000   -1.20000
AFIX   0
 
C30   1    0.457671    0.272560    0.413833    11.00000    0.03308    0.06000 =
         0.04049   -0.01286    0.00770    0.00270
AFIX  43
H30   2    0.486333    0.344317    0.429992    11.00000   -1.20000
AFIX   0
 
C56   1   -0.351397   -0.086141   -0.049798    11.00000    0.05898    0.06703 =
         0.03429    0.00599    0.00121    0.03665
AFIX  43
H56   2   -0.365797   -0.126758   -0.090211    11.00000   -1.20000
AFIX   0
C47   1   -0.031961    0.224410   -0.081880    11.00000    0.02639    0.09427 =
         0.03816    0.01910    0.00819    0.02771
AFIX  43
H47   2   -0.121257    0.223741   -0.081378    11.00000   -1.20000
AFIX   0
C46   1    0.039145    0.245101   -0.135999    11.00000    0.03239    0.08709 =
         0.03017    0.01048    0.00557    0.01548
AFIX  43
H46   2   -0.001291    0.257641   -0.172789    11.00000   -1.20000
AFIX   0
 
C15   1    0.241473    0.489017    0.579717    11.00000    0.04219    0.04271 =
         0.04370   -0.01102    0.00376    0.00759
AFIX  43
H15   2    0.211896    0.545632    0.590287    11.00000   -1.20000
AFIX   0
PART 1
C36   1    0.038679    0.342396    0.355094    61.00000    0.03803
AFIX  43
H36   2   -0.036074    0.301542    0.376357    61.00000   -1.20000
AFIX   0
 
PART 0
C57   1   -0.440648   -0.119609   -0.003260    11.00000    0.04516    0.07849 =
         0.04551    0.01423   -0.00691    0.02887
AFIX  43
H57   2   -0.514460   -0.183774   -0.011155    11.00000   -1.20000
AFIX   0
 
PART 1
C11   1    0.523509    0.408477    0.823339    51.00000    0.02597
 
PART 0
C74   1    0.069753    0.173576    0.688642    11.00000    0.04993    0.06168 =
         0.04028   -0.00333    0.00213    0.02385
AFIX 137
H74A  2    0.097892    0.166859    0.645050    11.00000   -1.50000
H74B  2    0.132756    0.161253    0.717782    11.00000   -1.50000
H74C  2    0.068909    0.243918    0.700104    11.00000   -1.50000
AFIX   0
 
C3    1    0.810205    0.308393    0.535900    11.00000    0.04778    0.05847 =
         0.05765    0.01391    0.01683    0.03167
C58   1   -0.421743   -0.058789    0.055190    11.00000    0.03220    0.12877 =
         0.03638    0.01389    0.00334    0.02253
AFIX  43
H58   2   -0.484218   -0.080086    0.087066    11.00000   -1.20000
AFIX   0
C59   1   -0.312764    0.031997    0.066755    11.00000    0.03312    0.12089 =
         0.02702   -0.00297    0.00276    0.02266
AFIX  43
H59   2   -0.299609    0.072916    0.107015    11.00000   -1.20000
AFIX   0
 
C6    1    0.330572   -0.249996    0.756038    11.00000    0.07901    0.06200 =
         0.05271   -0.01209   -0.00119    0.03716
PART 1
C10   1    0.609247    0.402595    0.868965    51.00000    0.02679
 
PART 0
C63   1   -0.167269    0.470094    0.101922    11.00000    0.06125    0.06692 =
         0.08953    0.01564    0.02269    0.04318
PART 1
AFIX  43
H63   2   -0.185085    0.531712    0.114772    21.00000   -1.20000
AFIX  43
PART 0
PART 2
H63A  2   -0.193324    0.527162    0.116700    41.00000   -1.20000
AFIX  43
PART 0
PART 3
H63B  2   -0.177281    0.533444    0.118500    31.00000   -1.20000
AFIX   0
 
PART 0
PART 1
C35   1    0.020572    0.399228    0.308656    61.00000    0.04679
AFIX  43
H35   2   -0.067206    0.396970    0.298062    61.00000   -1.20000
AFIX   0
C32   1    0.277531    0.410345    0.341340    61.00000    0.04294
AFIX  43
H32   2    0.365562    0.414748    0.353372    61.00000   -1.20000
AFIX   0
C34   1    0.128193    0.459430    0.277286    61.00000    0.04505
AFIX  43
H34   2    0.113659    0.494923    0.243733    61.00000   -1.20000
AFIX   0
 
C53   1    0.107245    0.235303    0.140091   -41.00000    0.04559
AFIX  43
H53   2    0.127755    0.302839    0.127611   -41.00000   -1.20000
AFIX   0
 
C33   1    0.259094    0.467846    0.295272    61.00000    0.04902
AFIX  43
H33   2    0.334125    0.512595    0.275964    61.00000   -1.20000
AFIX   0
 
C52   1    0.175043    0.219764    0.192752   -41.00000    0.05111
AFIX  43
H52   2    0.244168    0.276999    0.215943   -41.00000   -1.20000
AFIX   0
 
O1    6    0.596139    0.668588    0.923186    51.00000    0.06308    0.05427 =
         0.09350   -0.02995   -0.00915    0.02734
C12   1    0.582397    0.580689    0.900737    51.00000    0.04816
C67   1   -0.241220    0.277864    0.084715    21.00000    0.03023
AFIX  43
H67   2   -0.306809    0.210314    0.085682    21.00000   -1.20000
AFIX   0
C68   1   -0.019428    0.385664    0.058763    21.00000    0.04234
AFIX  43
H68   2    0.062690    0.390923    0.039859    21.00000   -1.20000
AFIX   0
C66   1   -0.268741    0.367220    0.103607    21.00000    0.03978
AFIX  43
H66   2   -0.355054    0.361074    0.117833    21.00000   -1.20000
AFIX   0
C69   1   -0.044134    0.474054    0.080831    21.00000    0.05151
AFIX  43
H69   2    0.025978    0.539977    0.081556    21.00000   -1.20000
AFIX   0
PART 0
PART 2
C61   1   -0.028420    0.377598    0.113738    41.00000    0.06584
AFIX  43
H61   2    0.047563    0.370368    0.133424    41.00000   -1.20000
AFIX   0
C64   1   -0.243058    0.406759    0.055902    41.00000    0.05519
AFIX  43
H64   2   -0.314771    0.419648    0.036062    41.00000   -1.20000
AFIX   0
C62   1   -0.057018    0.468124    0.132344    41.00000    0.08158
AFIX  43
H62   2   -0.003609    0.522619    0.163404    41.00000   -1.20000
AFIX   0
C65   1   -0.213233    0.319409    0.037465    41.00000    0.04880
AFIX  43
H65   2   -0.266757    0.272834    0.002905    41.00000   -1.20000
AFIX   0
PART 0
PART 3
C71   1   -0.060581    0.371485    0.031001    31.00000    0.03196
AFIX  43
H71   2   -0.011250    0.365290   -0.005275    31.00000   -1.20000
AFIX   0
C70   1   -0.080114    0.464160    0.050570    31.00000    0.03738
AFIX  43
H70   2   -0.036116    0.524120    0.030202    31.00000   -1.20000
AFIX   0
C73   1   -0.237313    0.372611    0.125767    31.00000    0.06190
AFIX  43
H73   2   -0.306493    0.367880    0.154418    31.00000   -1.20000
AFIX   0
C72   1   -0.204542    0.285700    0.107230    31.00000    0.07266
AFIX  43
H72   2   -0.246992    0.222633    0.124901    31.00000   -1.20000
AFIX   0
 
PART 0
PART 2
O1A   6    0.568661    0.631397    0.962557   -51.00000    0.06790    0.07218 =
         0.10777   -0.04527   -0.00921    0.01600
C9    1    0.568736    0.552029    0.930641   -51.00000    0.05673
S3A   4    0.650769    0.470518    0.953119   -51.00000    0.04455    0.08899 =
         0.05360   -0.02949   -0.00780    0.01967
S4A   4    0.482965    0.507806    0.855665   -51.00000    0.05275    0.04253 =
         0.07275   -0.00426    0.00897    0.01448
C8    1    0.606669    0.377564    0.884967   -51.00000    0.04193
C7    1    0.530738    0.397600    0.841424   -51.00000    0.03433
 
C41   1    0.310121    0.385741    0.337578   -61.00000    0.04549
AFIX  43
H41   2    0.389555    0.373047    0.347245   -61.00000   -1.20000
AFIX   0
C40   1    0.310213    0.448279    0.291576   -61.00000    0.05737
AFIX  43
H40   2    0.389338    0.480721    0.270244   -61.00000   -1.20000
AFIX   0
C39   1    0.192114    0.462580    0.277274   -61.00000    0.02890
AFIX  43
H39   2    0.192022    0.506903    0.246181   -61.00000   -1.20000
AFIX   0
C37   1    0.081827    0.354650    0.354477   -61.00000    0.04236
AFIX  43
H37   2    0.003790    0.322548    0.376615   -61.00000   -1.20000
AFIX   0
C38   1    0.075841    0.416111    0.305665   -61.00000    0.04081
AFIX  43
H38   2   -0.005463    0.424192    0.293572   -61.00000   -1.20000
AFIX   0
C44A  1    0.197937    0.341788    0.369445   -61.00000    0.03172
 
PART 0
H4    2   -0.114228    0.124183    0.712288    11.00000    0.06495
 
PART 2
C76   1    0.157961    0.240789    0.127717    41.00000    0.03016
AFIX  43
H76   2    0.197405    0.302233    0.108041    41.00000   -1.20000
AFIX   0
C77   1    0.226253    0.226080    0.178601    41.00000    0.03508
AFIX  43
H77   2    0.312383    0.275474    0.192712    41.00000   -1.20000
AFIX   0
C78   1    0.170075    0.140504    0.208709    41.00000    0.02723
AFIX  43
H78   2    0.210981    0.133354    0.247016    41.00000   -1.20000
AFIX   0
C79   1    0.052157    0.063750    0.182709    41.00000    0.03356
AFIX  43
H79   2    0.016723    0.000537    0.201016    41.00000   -1.20000
AFIX   0
C80   1   -0.014428    0.078050    0.130526    41.00000    0.03473
AFIX  43
H80   2   -0.094440    0.024299    0.112756    41.00000   -1.20000
AFIX   0
C75   1    0.035034    0.170723    0.103856    41.00000    0.02013
HKLF 4
 
REM  jz4109_0m_a.res in P-1
REM R1 =  0.0471 for    8253 Fo > 4sig(Fo)  and  0.0570 for all   10028 data
REM    728 parameters refined using    118 restraints
 
END  
     
WGHT      0.0455      2.5181 

REM Highest difference peak  0.854,  deepest hole -0.473,  1-sigma level  0.065
Q1    1   0.1789  0.4209  0.7597  11.00000  0.05    0.85
Q2    1   0.5430  0.1182  0.7824  11.00000  0.05    0.60
Q3    1   0.6237  0.2141  0.8817  11.00000  0.05    0.55
Q4    1   0.4586 -0.2449  0.7848  11.00000  0.05    0.55
Q5    1   0.6068 -0.0046  0.7974  11.00000  0.05    0.46
Q6    1   0.6981  0.2963  0.5534  11.00000  0.05    0.45
Q7    1   0.7663  0.2119  0.7491  11.00000  0.05    0.44
Q8    1   0.1880  0.3094  0.3915  11.00000  0.05    0.40
Q9    1   0.2339  0.4369  0.2730  11.00000  0.05    0.39
Q10   1  -0.1750  0.4092  0.1330  11.00000  0.05    0.39
Q11   1   0.1426  0.1704  0.2121  11.00000  0.05    0.37
Q12   1   0.0021  0.4052  0.0911  11.00000  0.05    0.37
Q13   1   0.2062  0.1846  0.1920  11.00000  0.05    0.37
Q14   1   0.8955  0.2819  0.6319  11.00000  0.05    0.36
Q15   1   0.0623  0.4511  0.2693  11.00000  0.05    0.35
Q16   1   0.5641  0.5156  0.9523  11.00000  0.05    0.34
Q17   1   0.5982  0.6143  0.8771  11.00000  0.05    0.33
Q18   1  -0.0532  0.4483  0.1531  11.00000  0.05    0.33
Q19   1   0.2125  0.2672  0.1800  11.00000  0.05    0.33
Q20   1  -0.1201  0.4508  0.0216  11.00000  0.05    0.32

REM The information below was added by Olex2.
REM
REM R1 = 0.0471 for 8253 Fo > 4sig(Fo) and 0.0570 for all 24008 data
REM n/a parameters refined using n/a restraints
REM Highest difference peak 0.85, deepest hole -0.47
REM Mean Shift 0, Max Shift -0.001.

REM +++ Tabular Listing of Refinement Information +++
REM R1_all = 0.0570
REM R1_gt = 0.0471
REM wR_ref = 0.1266
REM GOOF = 1.060
REM Shift_max = -0.001
REM Shift_mean = 0
REM Reflections_all = 24008
REM Reflections_gt = 8253
REM Parameters = n/a
REM Hole = -0.47
REM Peak = 0.85
REM Flack = n/a

;
_olex2_submission_special_instructions 'No special instructions were received'
loop_
  _refln_index_h
  _refln_index_k
  _refln_index_l
  _refln_F_squared_meas
  _refln_F_squared_sigma
 -2 0 0 110.59 8.1
 2 0 0 117.29 8
 -3 0 0 10.9 1.7
 -3 0 0 8.8 1.4
 -3 0 0 12.7 2
 3 0 0 10.1 1.6
 -4 0 0 264.27 18.6
 -4 0 0 268.17 18.9
 4 0 0 274.67 18.6
 -5 0 0 28.5 3.9
 5 0 0 22.7 3.1
 -6 0 0 713.63 49.7
 6 0 0 738.23 49.4
 -7 0 0 1543.15 107.59
 7 0 0 1700.73 108.59
 -8 0 0 4.1 1.9
 8 0 0 6.3 2.7
 -9 0 0 109.29 8.6
 9 0 0 94.19 9.2
 9 0 0 86.49 9.2
 -10 0 0 46 5.2
 -11 0 0 1.3 2.1
 -12 1 0 0.2 1.8
 -11 1 0 7.2 2.6
 -10 1 0 71.69 6.9
 9 -1 0 20.8 4.1
 -9 1 0 21.1 3.4
 8 -1 0 337.07 24
 -8 1 0 322.57 23
 7 -1 0 70.59 6.5
 -7 1 0 59.49 5.4
 6 -1 0 10.8 2.4
 5 -1 0 69.99 5.7
 -5 1 0 60.89 5.5
 -5 1 0 68.09 6
 4 -1 0 156.08 10.9
 -4 1 0 144.79 10.9
 3 -1 0 2 1
 -3 1 0 4.2 1.3
 2 -1 0 1228.18 81.09
 -1 1 0 812.52 53.59
 -2 -1 0 71.99 5.1
 -2 -1 0 63.69 5.2
 2 1 0 62.69 5
 -3 -1 0 765.62 52.69
 -3 -1 0 781.32 52.49
 3 1 0 816.52 52.59
 -4 -1 0 27.2 3.6
 4 1 0 28.5 3.2
 -5 -1 0 167.98 13.2
 5 1 0 176.38 12.8
 -6 -1 0 66.39 7.1
 6 1 0 78.19 6.7
 -7 -1 0 404.56 29
 7 1 0 439.86 30
 -8 -1 0 81.79 6.9
 8 1 0 70.49 7.6
 8 1 0 69.89 7.7
 -9 -1 0 1.8 2.2
 -10 -1 0 1.4 2.3
 -11 -1 0 17.1 2.9
 -12 2 0 50.99 4.8
 -11 2 0 2.7 2.2
 -10 2 0 5.2 2.2
 9 -2 0 101.09 9.8
 -9 2 0 111.89 9.6
 -9 2 0 115.39 8.9
 8 -2 0 200.88 15.3
 -8 2 0 193.38 14.2
 -8 2 0 199.08 15.1
 7 -2 0 -0.1 1.6
 -7 2 0 0.7 1.2
 6 -2 0 31.7 3.8
 -6 2 0 29.8 3.6
 5 -2 0 1323.17 87.99
 4 -2 0 49.1 4.2
 -4 2 0 46.2 4.2
 3 -2 0 351.76 23.7
 2 -2 0 49.7 4.3
 -2 2 0 65.49 4.5
 1 -2 0 432.56 29.9
 -1 2 0 450.05 29.9
 -1 2 0 430.16 29.8
 -1 -2 0 42.2 3.8
 1 2 0 45 3.5
 1 2 0 43.4 3.5
 -2 -2 0 426.96 29.6
 2 2 0 448.76 29.4
 -3 -2 0 807.32 54.39
 3 2 0 813.22 54.09
 -4 -2 0 478.65 32.7
 4 2 0 468.85 32.3
 -5 -2 0 114.59 9.4
 5 2 0 110.89 9
 -6 -2 0 51.69 6.1
 -6 -2 0 45.9 4.8
 6 2 0 54.09 5.6
 -7 -2 0 72.09 6.6
 7 2 0 75.69 7.4
 7 2 0 64.89 7.1
 -8 -2 0 43.7 5
 8 2 0 36.3 5.7
 -9 -2 0 41.8 5.4
 -10 -2 0 9.1 2.8
 -11 -2 0 18.4 2.8
 -12 3 0 6.2 2.1
 -11 3 0 0.1 2.1
 -10 3 0 98.89 7.8
 -10 3 0 84.69 8.3
 9 -3 0 52.39 6
 -9 3 0 50.09 4.9
 -9 3 0 42.7 5.5
 8 -3 0 88.29 7.6
 -8 3 0 74.99 7.5
 -8 3 0 73.29 6.4
 7 -3 0 11.8 2.6
 -7 3 0 10.8 2.7
 6 -3 0 13.7 2.4
 -6 3 0 14.9 2.7
 5 -3 0 12.5 2.2
 -5 3 0 13.1 2.4
 4 -3 0 535.75 36.2
 -4 3 0 541.85 36.3
 3 -3 0 99.39 6.7
 -3 3 0 80.99 6.7
 2 -3 0 9792.92 650.63
 -2 3 0 9999 650.93
 1 -3 0 957.3 63.69
 -1 3 0 962.1 63.59
 0 -3 0 461.15 30.9
 -1 -3 0 41.1 3.9
 1 3 0 42.1 3.6
 -2 -3 0 0.7 1.5
 2 3 0 1.4 1.2
 -3 -3 0 32.7 4
 3 3 0 28.4 3.4
 3 3 0 36.6 3.6
 -4 -3 0 811.42 55.29
 4 3 0 793.42 54.89
 4 3 0 842.82 54.99
 -5 -3 0 207.28 15.6
 5 3 0 200.88 15.2
 5 3 0 206.58 15.2
 -6 -3 0 17.3 3.4
 -6 -3 0 19.3 4
 6 3 0 20.7 3.9
 6 3 0 15.2 3.2
 -7 -3 0 42.1 5.1
 7 3 0 45.3 5.9
 -8 -3 0 13 3.4
 -9 -3 0 60.29 6.4
 -10 -3 0 17 3
 10 3 0 11.9 3.2
 -12 4 0 29.4 3.4
 -11 4 0 77.99 6.8
 -11 4 0 71.09 7.2
 -10 4 0 144.59 10.7
 -10 4 0 131.79 11.6
 9 -4 0 211.48 16.8
 -9 4 0 225.88 17.2
 -9 4 0 220.98 15.8
 8 -4 0 260.37 19.3
 -8 4 0 278.17 19.9
 -8 4 0 253.97 18.5
 7 -4 0 78.89 7.2
 -7 4 0 86.59 7.5
 6 -4 0 82.79 7.2
 -6 4 0 94.29 7.4
 5 -4 0 1830.12 119.89
 -5 4 0 1785.72 119.99
 4 -4 0 905.91 60.99
 -4 4 0 925.91 61.09
 3 -4 0 456.25 30.5
 -3 4 0 453.65 30.7
 2 -4 0 8493.25 547.45
 -2 4 0 8156.58 547.35
 1 -4 0 814.92 54.99
 -1 4 0 840.32 54.99
 0 -4 0 597.54 39.9
 0 4 0 593.74 39.8
 -1 -4 0 26.6 3.2
 1 4 0 26.1 3
 -2 -4 0 1.1 1.5
 2 4 0 1.7 1.4
 -3 -4 0 318.57 22.5
 3 4 0 320.47 22.3
 -4 -4 0 54.19 5.8
 4 4 0 52.39 5.3
 -5 -4 0 3.6 2.6
 5 4 0 2.3 2.3
 -6 -4 0 265.87 20.3
 -6 -4 0 266.27 19.5
 6 4 0 269.37 20
 -7 -4 0 292.37 20.6
 7 4 0 267.87 21.2
 -8 -4 0 1.8 2.4
 -9 -4 0 9.3 2.7
 9 4 0 13.2 3.5
 -10 -4 0 0.3 1.9
 -12 5 0 13.6 2.9
 -11 5 0 27.9 4.4
 -11 5 0 22.7 3.5
 -10 5 0 4.6 1.9
 -10 5 0 4.7 2.8
 9 -5 0 514.25 35.8
 -9 5 0 494.75 34.7
 -9 5 0 524.45 36.5
 8 -5 0 1.2 1.9
 -8 5 0 4.3 2.6
 -8 5 0 1.2 1.3
 7 -5 0 29.3 4
 -7 5 0 31.2 5.9
 -7 5 0 35.2 3.8
 6 -5 0 1144.89 77.09
 -6 5 0 1161.28 77.29
 5 -5 0 761.22 51.29
 -5 5 0 765.42 51.39
 4 -5 0 12.8 2.1
 -4 5 0 12.5 2.2
 3 -5 0 5 1.4
 -3 5 0 7.4 1.5
 2 -5 0 1940.71 125.49
 -2 5 0 1856.51 125.39
 1 -5 0 66.39 5.4
 -1 5 0 65.29 5.3
 0 -5 0 98.29 7.5
 0 5 0 94.59 7.2
 -1 -5 0 0.3 1.4
 1 5 0 0.5 1.3
 -2 -5 0 45.2 4.6
 2 5 0 40.1 4.3
 -3 -5 0 85.19 7.5
 3 5 0 81.59 7.3
 -4 -5 0 9.5 3
 4 5 0 12.4 3
 -5 -5 0 0.9 2.4
 -5 -5 0 1 2.5
 5 5 0 0 2.5
 -6 -5 0 19.7 3.8
 -6 -5 0 22.7 4.7
 -7 -5 0 159.78 12.8
 -8 -5 0 4.8 2.5
 8 5 0 2.1 3
 -9 -5 0 31.6 4.4
 9 5 0 40.9 5.1
 -12 6 0 55.09 5.8
 -11 6 0 48.8 6.2
 -11 6 0 50.29 5
 -10 6 0 169.98 13.8
 -10 6 0 152.58 11.8
 9 -6 0 29.9 4.8
 -9 6 0 45.2 6.1
 -9 6 0 34 3.8
 8 -6 0 0.8 1.8
 -8 6 0 2.7 3.1
 -8 6 0 -0.8 2.4
 -8 6 0 1.1 1.2
 7 -6 0 76.79 6.4
 -7 6 0 50.79 7.2
 -7 6 0 61.09 5.4
 -7 6 0 71.49 8.9
 6 -6 0 6.8 2.1
 -6 6 0 4.9 2
 -6 6 0 5.4 3.3
 5 -6 0 1319.97 86.69
 -5 6 0 1283.77 86.79
 4 -6 0 1991.2 131.89
 3 -6 0 1667.23 110.49
 2 -6 0 1876.11 124.19
 1 -6 0 85.69 6.9
 0 -6 0 306.17 21.3
 -1 -6 0 15.1 2.7
 -2 -6 0 98.09 8.3
 -3 -6 0 102.39 9
 -4 -6 0 30.8 5
 4 6 0 44 5.6
 -5 -6 0 151.88 12.6
 5 6 0 140.59 12.8
 -6 -6 0 99.69 11
 -6 -6 0 125.49 10.2
 6 6 0 125.29 10.8
 -7 -6 0 7.2 2.7
 7 6 0 4.8 3.3
 -8 -6 0 9.6 2.9
 8 6 0 8.6 3.2
 -9 -6 0 10.9 2.6
 9 6 0 12.1 3
 -12 7 0 38 5
 -11 7 0 0.7 2.6
 -10 7 0 247.98 18.6
 -10 7 0 299.67 21.2
 9 -7 0 126.59 11.1
 -9 7 0 154.48 12.5
 -9 7 0 126.99 9.9
 8 -7 0 -0.5 1.8
 -8 7 0 -0.2 2.7
 -8 7 0 0.2 3.3
 -8 7 0 0.7 1.3
 7 -7 0 27.8 3.7
 -7 7 0 16.5 2.4
 -7 7 0 7.6 3.5
 6 -7 0 1.7 1.7
 -6 7 0 2.7 3.2
 5 -7 0 95.39 7.8
 -5 7 0 99.39 10.2
 4 -7 0 1689.93 112.29
 3 -7 0 823.42 55.29
 2 -7 0 286.87 20.1
 1 -7 0 69.49 6.2
 0 -7 0 529.95 36.3
 -1 -7 0 559.54 38.4
 -2 -7 0 1.9 2.1
 2 7 0 2 2
 -3 -7 0 223.68 16.3
 3 7 0 215.08 15.9
 3 7 0 191.88 16
 -4 -7 0 96.89 9.3
 4 7 0 105.39 9
 4 7 0 80.69 8.9
 -5 -7 0 22.1 4.8
 5 7 0 24.1 4.6
 5 7 0 25.6 4.9
 6 7 0 2.7 2.9
 -7 -7 0 28.8 4.4
 7 7 0 33.8 5.2
 -8 -7 0 11.9 2.9
 8 7 0 7.7 2.9
 -12 8 0 31.9 4.5
 -11 8 0 1.6 2.7
 -10 8 0 3.1 3
 9 -8 0 44.4 5.7
 -9 8 0 39.6 6.2
 -9 8 0 44.5 8.5
 -9 8 0 41.5 4
 8 -8 0 182.48 14.1
 -8 8 0 162.48 16.1
 -8 8 0 177.08 12.8
 -8 8 0 218.28 15.6
 -8 8 0 165.88 16.7
 7 -8 0 41.6 4.7
 -7 8 0 29.7 3.5
 -7 8 0 44.2 7.8
 -7 8 0 30.1 5.5
 6 -8 0 -0.6 1.7
 -6 8 0 1.8 1.3
 -6 8 0 0.5 3.2
 5 -8 0 9 2.3
 -5 8 0 6.3 3.8
 4 -8 0 333.17 22.9
 -4 8 0 315.97 25.8
 3 -8 0 355.86 23.3
 -3 8 0 302.07 25.7
 2 -8 0 40.5 4.5
 -2 8 0 34.2 6.6
 1 -8 0 50.39 5.3
 0 -8 0 245.48 18.2
 0 8 0 251.77 18.2
 -1 -8 0 423.36 30.6
 1 8 0 444.96 30.4
 -2 -8 0 188.78 16.1
 2 8 0 217.78 15.1
 2 8 0 204.28 15.9
 2 8 0 231.88 16.8
 -3 -8 0 269.57 19.7
 3 8 0 276.07 19.4
 3 8 0 226.08 19.5
 -4 -8 0 7.2 3.7
 4 8 0 4.7 3
 4 8 0 1 3.1
 5 8 0 -1.1 3
 5 8 0 2.7 2.7
 6 8 0 17.1 4
 7 8 0 5.3 2.8
 -12 9 0 3.3 2.3
 -12 9 0 3.2 2.3
 -11 9 0 0.4 2.5
 -10 9 0 13.5 4.1
 -9 9 0 183.28 15.7
 -9 9 0 196.08 18.3
 8 -9 0 2.5 2.4
 -8 9 0 7 4.7
 -8 9 0 2.7 2.9
 7 -9 0 357.46 26.2
 -7 9 0 408.86 27.2
 -7 9 0 391.26 28.7
 -7 9 0 313.47 29.2
 6 -9 0 90.09 7.9
 -6 9 0 100.29 10.5
 -6 9 0 77.89 10.9
 -6 9 0 78.89 6.6
 5 -9 0 10.9 2.7
 -5 9 0 26.1 3.7
 -5 9 0 12.5 3.5
 -5 9 0 3.8 4.1
 4 -9 0 500.05 33
 -4 9 0 445.96 36.2
 -4 9 0 473.45 33.6
 3 -9 0 2.7 2
 -3 9 0 4 2.7
 -3 9 0 2.1 3.3
 2 -9 0 31.2 4.3
 -2 9 0 34.7 7.6
 -2 9 0 29.2 4.5
 1 -9 0 149.29 10.8
 -1 9 0 114.79 12
 -1 9 0 126.19 10.4
 -1 9 0 127.69 10.7
 0 -9 0 388.96 28.4
 0 9 0 388.36 28.8
 0 9 0 402.76 28.5
 0 9 0 422.96 27.7
 -1 -9 0 81.19 8.2
 1 9 0 81.59 8
 1 9 0 85.09 7.1
 1 9 0 91.79 8.7
 -2 -9 0 62.79 7.4
 2 9 0 65.89 5.9
 2 9 0 66.09 7
 2 9 0 63.99 7.9
 -3 -9 0 1.2 3.2
 3 9 0 2.6 2.6
 3 9 0 4.7 3.3
 4 9 0 19.2 4.1
 4 9 0 4.7 3.6
 5 9 0 93.49 9.4
 5 9 0 85.39 8.8
 6 9 0 28.7 4.7
 7 9 0 87.79 7.9
 -12 10 0 60.69 5.9
 -12 10 0 58.99 5.5
 -11 10 0 16.2 3.8
 -10 10 0 4.1 2.9
 -9 10 0 8.1 4.8
 -9 10 0 16.1 3.9
 8 -10 0 220.78 17.5
 -8 10 0 250.67 18.1
 -8 10 0 200.28 20.6
 -8 10 0 246.18 20.2
 7 -10 0 66.49 7.1
 -7 10 0 79.99 7.8
 -7 10 0 49.2 9.7
 -7 10 0 81.69 9.7
 6 -10 0 107.49 8.9
 -6 10 0 113.99 12.9
 -6 10 0 82.79 10.5
 -6 10 0 77.89 8.2
 5 -10 0 228.38 16.1
 -5 10 0 247.68 20.6
 -5 10 0 181.08 16.5
 -5 10 0 204.28 18.2
 -5 10 0 196.18 15.7
 4 -10 0 10.4 3
 -4 10 0 7.6 4.5
 -4 10 0 16.2 4.8
 -4 10 0 17.5 3.1
 -4 10 0 17.1 4.6
 -4 10 0 10.7 3.7
 3 -10 0 13 3.2
 -3 10 0 1.8 3.4
 -3 10 0 12.9 3.5
 -3 10 0 1.9 3.3
 -3 10 0 4.9 2.2
 -3 10 0 18.8 6
 2 -10 0 94.99 8.7
 -2 10 0 100.29 8.2
 -2 10 0 99.99 9.1
 -2 10 0 86.79 9.6
 -2 10 0 105.69 10.6
 1 -10 0 9.4 3
 -1 10 0 0.1 3.1
 -1 10 0 1.9 3.4
 -1 10 0 9.5 3
 -1 10 0 7.2 2.1
 0 -10 0 38.7 5.5
 0 10 0 46.1 4.6
 0 10 0 39.4 5.9
 0 10 0 36.3 5.2
 -1 -10 0 123.69 11.8
 1 10 0 127.09 11.6
 1 10 0 161.58 12.9
 1 10 0 140.09 10.7
 -2 -10 0 17.3 4.4
 2 10 0 6.8 2.3
 2 10 0 11.5 4.2
 2 10 0 11.7 3.6
 3 10 0 -1.9 3.4
 3 10 0 -0.5 2.6
 4 10 0 35.8 6.2
 4 10 0 42.5 5.9
 5 10 0 62.59 8.1
 5 10 0 74.79 7.5
 6 10 0 -1.2 2.2
 -11 11 0 6.2 2.5
 -10 11 0 -0.1 2.2
 -10 11 0 -0.3 3.5
 -9 11 0 20 4
 -9 11 0 17.1 5.5
 -8 11 0 150.18 15
 -8 11 0 115.69 10.8
 -8 11 0 116.59 12.8
 7 -11 0 138.69 12.6
 -7 11 0 162.68 12.8
 -7 11 0 117.79 15.5
 -7 11 0 186.68 15.4
 6 -11 0 601.24 40.9
 -6 11 0 692.53 46
 -6 11 0 509.85 42.5
 -6 11 0 552.04 40.5
 5 -11 0 27.3 4.3
 -5 11 0 20.7 5
 4 -11 0 86.59 8.4
 -4 11 0 92.39 10.5
 -4 11 0 84.99 9.2
 -4 11 0 94.19 7.9
 -4 11 0 83.49 12.6
 -4 11 0 86.09 10.3
 3 -11 0 105.99 9.4
 -3 11 0 102.49 11.1
 -3 11 0 101.29 10.9
 -3 11 0 101.89 8.6
 -3 11 0 104.29 9.8
 2 -11 0 19.3 3.7
 -2 11 0 7.1 4
 -2 11 0 17.7 4
 -2 11 0 9.3 2.6
 -2 11 0 9 4
 1 -11 0 36.3 5
 -1 11 0 37.5 5.1
 -1 11 0 19.7 3.4
 -1 11 0 17.8 4.8
 -1 11 0 8.9 4.5
 0 -11 0 13.7 4
 0 11 0 19.3 4.2
 0 11 0 21.8 3.5
 0 11 0 24.8 5.2
 -1 -11 0 100.49 10.5
 1 11 0 117.79 10.6
 1 11 0 106.49 9.2
 1 11 0 135.89 12.2
 2 11 0 72.39 9.5
 2 11 0 89.79 8.4
 2 11 0 69.29 6.7
 3 11 0 0.2 3.8
 3 11 0 -1.3 2.5
 4 11 0 7.4 3.9
 4 11 0 8 3.1
 5 11 0 25.7 4.1
 -11 12 0 20.5 3.2
 -11 12 0 21.7 3.2
 -10 12 0 18.1 3.4
 -10 12 0 25.6 6.3
 -9 12 0 28.1 4.3
 -9 12 0 36.8 7.3
 -9 12 0 19.8 5.9
 -8 12 0 35.3 7.8
 -8 12 0 33.3 6.6
 -7 12 0 62.29 9.1
 -7 12 0 53.99 6.3
 -6 12 0 10.2 2.8
 -6 12 0 11.2 4.7
 -6 12 0 1.4 4.8
 5 -12 0 238.18 20.1
 -5 12 0 293.77 20.1
 -5 12 0 293.97 22.7
 -5 12 0 280.57 22.4
 -5 12 0 257.37 20.9
 4 -12 0 27 4.5
 -4 12 0 25.6 5.3
 -4 12 0 25.2 3.9
 -4 12 0 25.3 5.9
 -4 12 0 24.3 6.2
 3 -12 0 42.7 6.1
 -3 12 0 61.79 8.3
 -3 12 0 59.99 5.8
 -3 12 0 50.89 6.9
 -3 12 0 55.39 7.9
 2 -12 0 6.2 3.2
 -2 12 0 10.1 3.5
 -2 12 0 9.6 4.2
 -2 12 0 5.6 2.2
 -2 12 0 5.4 4.2
 1 -12 0 0.9 3
 -1 12 0 2.6 2
 -1 12 0 -0.7 3.7
 -1 12 0 2.6 2.9
 0 12 0 59.29 7.2
 0 12 0 57.29 5.9
 0 12 0 68.19 9.1
 1 12 0 22.3 4.5
 1 12 0 23 3.4
 1 12 0 21 5.6
 2 12 0 8.7 4.4
 2 12 0 4.3 3
 3 12 0 5.5 2.9
 3 12 0 -0.1 3.5
 4 12 0 22.6 4.4
 4 12 0 23.5 3.9
 -10 13 0 14.2 2.8
 -9 13 0 23.9 5.3
 -9 13 0 29 4.2
 -8 13 0 81.99 9.7
 -7 13 0 1.1 2.7
 -7 13 0 5.3 3.9
 -7 13 0 2.3 2.3
 -6 13 0 104.99 11.9
 -6 13 0 108.59 9.2
 -5 13 0 12.9 5.4
 -5 13 0 15.2 5.2
 -5 13 0 17.2 3.3
 -4 13 0 -0.6 4.1
 -4 13 0 0.3 3.1
 -4 13 0 0.3 2
 -4 13 0 2 3.8
 -3 13 0 19.2 5.5
 -3 13 0 26.8 3.9
 -3 13 0 21.2 5.7
 -3 13 0 33.7 5.6
 -2 13 0 8.4 4.6
 -2 13 0 8.2 2.5
 -2 13 0 5.4 3.2
 -2 13 0 9.6 4.7
 -1 13 0 8 2.6
 -1 13 0 7.7 4.7
 -1 13 0 16.6 4.1
 0 13 0 19.8 5.4
 0 13 0 16.5 3
 0 13 0 9.3 3.5
 1 13 0 4.3 3
 1 13 0 3.2 4.1
 1 13 0 2 2.1
 2 13 0 17.8 4.8
 2 13 0 29.8 4.5
 3 13 0 36.3 5.2
 3 13 0 34.9 4.7
 -10 14 0 -1.5 1.7
 -9 14 0 76.99 8.3
 -9 14 0 67.69 6.5
 -8 14 0 1.3 2.3
 -8 14 0 5.3 3.6
 -7 14 0 6.7 4.1
 -7 14 0 8.2 2.4
 -6 14 0 -1.9 3.4
 -6 14 0 1 2.1
 -5 14 0 20.1 5.5
 -5 14 0 20.2 5.7
 -5 14 0 18.6 3.4
 -4 14 0 14.4 5.1
 -4 14 0 15.2 3.2
 -4 14 0 11.2 5.3
 -3 14 0 120.59 9.9
 -3 14 0 131.09 12.7
 -3 14 0 113.79 10.8
 -3 14 0 116.39 12.4
 -2 14 0 141.59 12.3
 -2 14 0 110.99 9.1
 -2 14 0 87.79 9.8
 -1 14 0 6.6 4.3
 -1 14 0 4.8 2.4
 -1 14 0 14.3 3.6
 0 14 0 1.3 1.9
 0 14 0 -1.3 3.5
 0 14 0 0.5 2.6
 1 14 0 0.9 2.4
 1 14 0 -0.9 1.7
 1 14 0 0.3 3.1
 2 14 0 4.3 3
 -8 15 0 7.1 3.4
 -7 15 0 -1 1.6
 -7 15 0 2 3.2
 -6 15 0 34.2 6.3
 -6 15 0 37.6 4.3
 -5 15 0 11.3 2.7
 -5 15 0 15.9 4.9
 -4 15 0 1.9 3.8
 -4 15 0 9 2.4
 -4 15 0 4.7 4.5
 -3 15 0 1.2 2
 -3 15 0 1.3 3.8
 -3 15 0 -0.6 3.9
 -2 15 0 12.7 4.5
 -2 15 0 13.2 2.6
 -2 15 0 7.5 3.4
 -1 15 0 6 3
 -1 15 0 7.4 2.2
 -1 15 0 6.8 3.7
 0 15 0 8.6 2
 -6 16 0 6.3 1.8
 -6 16 0 8.4 3.5
 -5 16 0 8.1 2
 -5 16 0 6.2 3.5
 -4 16 0 0.6 1.6
 -4 16 0 -0.8 3.2
 -3 16 0 3.6 1.7
 -3 16 0 8.6 3.6
 -2 16 -1 0 1.6
 -2 16 -1 2.9 3.3
 -3 16 -1 30.3 5
 -3 16 -1 21 3
 -4 16 -1 2.4 1.7
 -4 16 -1 0.9 3.3
 -5 16 -1 14.1 2.5
 -5 16 -1 17.4 4.4
 -6 16 -1 0.9 1.5
 -6 16 -1 5.9 3.4
 -7 16 -1 13.1 3.8
 0 15 -1 -2.3 2.7
 0 15 -1 0.6 1.8
 -1 15 -1 35.1 5.7
 -1 15 -1 34.5 4
 -1 15 -1 33.3 4.8
 -2 15 -1 7.4 4
 -2 15 -1 -1.5 2.7
 -2 15 -1 4.3 2.2
 -3 15 -1 27.8 3.9
 -3 15 -1 33.5 6.1
 -3 15 -1 31.9 4.9
 -3 15 -1 25.8 5.8
 -4 15 -1 55.89 6
 -4 15 -1 62.89 8.5
 -4 15 -1 71.59 7.8
 -4 15 -1 70.89 8.6
 -5 15 -1 4.2 2.2
 -5 15 -1 0.1 3.5
 -6 15 -1 1.3 3.5
 -6 15 -1 0.7 1.8
 -7 15 -1 62.49 7.9
 -7 15 -1 61.89 5.6
 -8 15 -1 -1.1 2.8
 2 14 -1 4.9 2.9
 1 14 -1 2.6 3.2
 1 14 -1 0.2 2.5
 0 14 -1 0.3 1.9
 0 14 -1 3.8 3
 0 14 -1 -0.3 3.6
 -1 14 -1 6.8 4.5
 -1 14 -1 6.3 2.4
 -1 14 -1 4.9 3.2
 -2 14 -1 82.29 9
 -2 14 -1 88.69 8
 -2 14 -1 101.79 10.6
 -3 14 -1 11.4 3
 -3 14 -1 6.7 4.7
 -3 14 -1 13.5 4.1
 -3 14 -1 14.5 5.2
 -4 14 -1 60.59 7.2
 -4 14 -1 57.29 8.3
 -4 14 -1 51.39 5.9
 -4 14 -1 48.7 8.2
 -5 14 -1 12.3 5.1
 -5 14 -1 12.4 3
 -5 14 -1 14.8 3.9
 -6 14 -1 3.5 2.4
 -6 14 -1 1.5 4
 -7 14 -1 26.1 3.7
 -7 14 -1 26.9 6
 -7 14 -1 25 4.2
 -8 14 -1 -2.6 2.1
 -8 14 -1 -1.3 3.1
 -9 14 -1 131.79 12.1
 -9 14 -1 136.09 10.4
 -10 14 -1 16.3 2.6
 3 13 -1 10.2 2.9
 3 13 -1 5.1 3.3
 2 13 -1 37.5 5.1
 2 13 -1 28 5.5
 1 13 -1 12.2 3.6
 1 13 -1 15.2 4.9
 1 13 -1 11.5 2.8
 0 13 -1 101.39 10.8
 0 13 -1 93.69 9.3
 0 13 -1 87.49 7.9
 -1 13 -1 91.99 9.4
 -1 13 -1 87.19 8
 -1 13 -1 105.79 11
 -2 13 -1 125.59 12.4
 -2 13 -1 117.49 12
 -2 13 -1 110.49 10.6
 -2 13 -1 104.29 9.4
 -3 13 -1 -0.7 3.2
 -3 13 -1 -0.1 3.5
 -3 13 -1 0.8 2.1
 -3 13 -1 0.7 3.9
 -4 13 -1 -0.8 2.2
 -4 13 -1 0.7 3.5
 -4 13 -1 -1.3 3.9
 -4 13 -1 3.7 3.3
 -5 13 -1 9.8 3.7
 -5 13 -1 5.3 4.1
 -5 13 -1 7.7 2.7
 -6 13 -1 3.8 3.9
 -6 13 -1 3.3 2.7
 -6 13 -1 4.9 2.5
 -7 13 -1 61.99 6.3
 -7 13 -1 64.99 9
 -7 13 -1 62.39 6.7
 -8 13 -1 11.9 4.7
 -8 13 -1 8.8 2.9
 -9 13 -1 2.4 2.3
 -9 13 -1 2.2 3.6
 -10 13 -1 76.09 6.8
 4 12 -1 0.7 2.9
 4 12 -1 0.1 2.3
 3 12 -1 3.6 3.6
 3 12 -1 7.3 3.1
 2 12 -1 4.4 4.3
 2 12 -1 8.9 3.4
 1 12 -1 152.88 13.3
 1 12 -1 117.19 10.2
 1 12 -1 130.39 11.6
 0 12 -1 1.2 2.8
 0 12 -1 4.9 4.3
 0 12 -1 6.2 2.2
 -1 12 -1 78.29 9.7
 -1 12 -1 70.39 7.2
 -1 12 -1 97.79 8.9
 1 -12 1 89.69 8.6
 -2 12 -1 42.5 7.1
 -2 12 -1 31.7 4.3
 -2 12 -1 37 6.2
 -2 12 -1 37.2 5.7
 2 -12 1 23.3 4.7
 -3 12 -1 4.3 2.2
 -3 12 -1 8.9 4.3
 -3 12 -1 0.8 2.9
 -3 12 -1 -0.8 3.5
 3 -12 1 2.4 2.6
 -4 12 -1 0.7 4.1
 -4 12 -1 3.6 2.3
 -4 12 -1 8.8 3.9
 -4 12 -1 -0.1 3.5
 4 -12 1 12.5 3.4
 -5 12 -1 52.19 8.8
 -5 12 -1 66.49 6.6
 -5 12 -1 72.69 8.3
 -6 12 -1 99.59 12.1
 -6 12 -1 105.19 9.7
 -6 12 -1 143.59 16.1
 -7 12 -1 116.79 12.6
 -7 12 -1 130.39 10.4
 -8 12 -1 9.3 5.2
 -8 12 -1 4.1 4
 -9 12 -1 2.2 4.1
 -9 12 -1 2.9 2.3
 -10 12 -1 8.1 2.6
 -11 12 -1 2.3 1.9
 -11 12 -1 2.3 1.8
 5 11 -1 10.5 3.1
 5 11 -1 20.2 4.1
 4 11 -1 97.69 9
 4 11 -1 89.19 9.7
 3 11 -1 74.79 9.2
 3 11 -1 78.59 8.2
 2 11 -1 6.3 3.3
 2 11 -1 4.4 4.1
 1 11 -1 4.9 2.1
 1 11 -1 8.7 4.2
 1 11 -1 2.2 2.8
 -1 -11 1 9.4 3.5
 0 11 -1 4 3.3
 0 11 -1 2.4 2.7
 0 11 -1 -0.1 1.7
 0 -11 1 3.7 2.8
 -1 11 -1 34.5 6.5
 -1 11 -1 45.8 4.7
 -1 11 -1 35.3 6
 -1 11 -1 44.9 5.9
 1 -11 1 37.1 5.4
 -2 11 -1 110.39 10.6
 -2 11 -1 104.29 8.5
 -2 11 -1 114.09 11.2
 -2 11 -1 95.49 9.6
 2 -11 1 86.49 9
 -3 11 -1 0.9 1.9
 -3 11 -1 6.7 3.6
 -3 11 -1 1.6 3.2
 -3 11 -1 2.1 3.3
 -3 11 -1 4.2 3
 3 -11 1 8.9 2.9
 -4 11 -1 1.2 3.4
 -4 11 -1 3.9 3.8
 -4 11 -1 1.2 2
 -4 11 -1 -0.7 2.9
 -4 11 -1 0.2 3.1
 4 -11 1 1 2.4
 -5 11 -1 310.07 25.8
 -5 11 -1 328.87 25.9
 -5 11 -1 332.87 23.7
 -5 11 -1 364.96 29
 -5 11 -1 316.87 24.7
 5 -11 1 323.77 23.8
 -6 11 -1 490.55 36
 -6 11 -1 416.26 33.4
 -6 11 -1 417.26 30.9
 -7 11 -1 160.78 16.1
 -7 11 -1 153.08 14.8
 -7 11 -1 133.29 11.8
 -8 11 -1 167.48 16
 -8 11 -1 185.68 17.4
 -8 11 -1 166.28 13.8
 -9 11 -1 26.6 4.4
 -9 11 -1 12.9 5.2
 -10 11 -1 56.99 6.3
 -11 11 -1 13.6 3.1
 -11 11 -1 15.3 3.1
 6 10 -1 3.6 2.7
 5 10 -1 1.3 2.7
 5 10 -1 6 3.7
 4 10 -1 19.3 4.4
 4 10 -1 40.6 6
 3 10 -1 39.7 5.7
 3 10 -1 29.6 5.9
 2 10 -1 165.48 12.4
 2 10 -1 182.78 14.4
 2 10 -1 171.18 13.7
 -2 -10 1 133.59 13.5
 1 10 -1 77.69 7.8
 1 10 -1 69.79 6.6
 1 10 -1 75.49 8.6
 -1 -10 1 70.39 7.9
 0 10 -1 82.39 6.8
 0 10 -1 69.89 7.5
 0 10 -1 81.39 8.5
 0 -10 1 71.19 7.6
 -1 10 -1 66.19 8.7
 -1 10 -1 76.49 8.2
 -1 10 -1 78.79 6.8
 -1 10 -1 82.89 7.8
 1 -10 1 79.69 7.5
 -2 10 -1 5.8 2.2
 -2 10 -1 5.8 3.4
 -2 10 -1 26.1 4.6
 -2 10 -1 14.6 3.6
 2 -10 1 19.1 3.5
 -3 10 -1 322.47 26.5
 -3 10 -1 377.66 25.2
 -3 10 -1 372.06 27.7
 -3 10 -1 356.66 26.2
 3 -10 1 364.26 25.6
 -4 10 -1 243.98 18.4
 -4 10 -1 241.88 17.1
 -4 10 -1 224.38 19.4
 -4 10 -1 248.58 21.4
 -4 10 -1 198.28 18.4
 4 -10 1 237.88 17.4
 -5 10 -1 8.1 2.8
 -5 10 -1 9.5 3.6
 -5 10 -1 4.8 4.3
 -5 10 -1 6.5 4.1
 5 -10 1 7.8 2.5
 -6 10 -1 169.58 14.5
 -6 10 -1 157.88 11.9
 -6 10 -1 122.89 14.9
 6 -10 1 142.09 11.8
 -7 10 -1 44.4 8.6
 -7 10 -1 8.5 3.3
 7 -10 1 20.3 5.6
 -8 10 -1 239.38 18.2
 -8 10 -1 262.87 22
 -8 10 -1 200.38 19.6
 -9 10 -1 273.47 21
 -9 10 -1 275.87 23.7
 -10 10 -1 269.57 20.4
 -11 10 -1 35.5 5.1
 -12 10 -1 16.3 2.8
 -12 10 -1 11 2.8
 7 9 -1 1.1 2.4
 6 9 -1 2.7 2.7
 5 9 -1 26.6 4.9
 5 9 -1 40.5 5.9
 4 9 -1 87.19 8.5
 4 9 -1 72.59 8.8
 3 9 -1 132.79 11.5
 3 9 -1 150.78 12.4
 -3 -9 1 111.79 11.8
 2 9 -1 33.5 5.6
 2 9 -1 29.2 3.9
 2 9 -1 36.8 5.2
 -2 -9 1 30.6 5.1
 1 9 -1 18.8 3.6
 1 9 -1 20.1 4.2
 1 9 -1 20.7 2.9
 1 9 -1 11.7 3.1
 -1 -9 1 10.9 3.3
 0 9 -1 1.2 2.7
 0 9 -1 0.7 1.8
 0 9 -1 1.3 2.1
 0 -9 1 -0.3 2.1
 -1 9 -1 65.99 6.8
 1 -9 1 65.89 6.5
 -2 9 -1 49.7 5.9
 2 -9 1 52.79 5.5
 -3 9 -1 86.79 10.9
 -3 9 -1 107.99 9.4
 3 -9 1 106.89 8.5
 -4 9 -1 5 3.7
 -4 9 -1 3.7 2.7
 4 -9 1 2.8 2.1
 -5 9 -1 384.66 28.2
 -5 9 -1 422.86 32
 -5 9 -1 397.26 29.1
 -5 9 -1 373.36 30.4
 5 -9 1 439.46 28.4
 -6 9 -1 4.1 2.8
 -6 9 -1 3.8 3.7
 -6 9 -1 10.6 4.6
 -6 9 -1 1.3 2.2
 6 -9 1 7.8 2.5
 -7 9 -1 511.25 39.6
 -7 9 -1 449.56 36.4
 -7 9 -1 570.64 38.9
 7 -9 1 536.25 36
 -8 9 -1 287.47 20.1
 -8 9 -1 225.98 21.9
 8 -9 1 258.07 19
 -9 9 -1 3 2.8
 -9 9 -1 -1.7 3.5
 -10 9 -1 25 5
 -11 9 -1 36.9 5.4
 -12 9 -1 16.9 3.4
 -12 9 -1 15.3 2.9
 7 8 -1 25.6 4.3
 6 8 -1 0.1 2.6
 5 8 -1 23.7 4.7
 5 8 -1 23.5 4.5
 4 8 -1 4 2.6
 4 8 -1 -0.8 3
 -4 -8 1 8.3 3.7
 3 8 -1 74.19 7.6
 3 8 -1 88.09 8.4
 -3 -8 1 66.69 7.9
 2 8 -1 38.9 4.8
 2 8 -1 38.1 5.2
 2 8 -1 31.7 4.6
 -2 -8 1 25.1 4.5
 1 8 -1 509.75 36
 -1 -8 1 530.85 36.1
 0 8 -1 53.39 5.7
 0 -8 1 59.39 5.7
 1 -8 1 26.2 3.6
 -2 8 -1 85.69 9.8
 2 -8 1 82.19 7.1
 -3 8 -1 3.7 3.3
 3 -8 1 1.9 1.6
 -4 8 -1 90.09 10.5
 4 -8 1 101.69 7.9
 -5 8 -1 62.19 7.4
 -5 8 -1 94.09 10.1
 5 -8 1 77.89 6.7
 -6 8 -1 97.19 11
 6 -8 1 91.09 7.9
 -7 8 -1 149.99 14.3
 -7 8 -1 138.99 13.1
 -7 8 -1 106.49 11.3
 7 -8 1 130.69 10.6
 -8 8 -1 307.77 25.3
 -8 8 -1 347.27 24.2
 -8 8 -1 295.87 26.1
 8 -8 1 326.57 23.1
 -9 8 -1 0.3 2.6
 9 -8 1 1.7 2.4
 -10 8 -1 2.8 2.7
 -11 8 -1 2.4 2.7
 -12 8 -1 9.5 2.9
 8 7 -1 7.8 2.8
 -8 -7 1 4.8 2.7
 7 7 -1 10.6 3.3
 6 7 -1 3.1 3
 5 7 -1 5.3 2.9
 5 7 -1 13.1 3.6
 -5 -7 1 -0.1 3.1
 4 7 -1 10.6 3.4
 4 7 -1 5.2 2.6
 -4 -7 1 4.3 3.1
 3 7 -1 5.5 2.5
 3 7 -1 3.6 2.8
 -3 -7 1 6.5 2.9
 2 7 -1 247.58 18.4
 -2 -7 1 260.97 18.7
 -1 -7 1 447.26 31
 0 -7 1 31.7 3.9
 1 -7 1 3.6 1.7
 2 -7 1 32.2 3.6
 3 -7 1 33.9 3.7
 4 -7 1 425.16 29.1
 -5 7 -1 147.89 13.9
 5 -7 1 157.58 11.4
 -6 7 -1 151.78 14.4
 6 -7 1 167.28 12.1
 -7 7 -1 437.56 33.7
 -7 7 -1 478.85 31.9
 -7 7 -1 479.65 34.9
 -7 7 -1 460.35 35.3
 7 -7 1 498.65 32.8
 -8 7 -1 610.34 43.1
 -8 7 -1 569.24 44.9
 -8 7 -1 698.53 47.4
 8 -7 1 691.13 44.3
 -9 7 -1 117.49 9.5
 -9 7 -1 136.39 12.1
 9 -7 1 143.69 11.1
 -10 7 -1 8.6 3.5
 -11 7 -1 2.9 2.7
 -12 7 -1 43.4 5.3
 9 6 -1 10.2 2.8
 -9 -6 1 8.1 2.5
 8 6 -1 21.4 4.1
 -8 -6 1 16.7 3.6
 7 6 -1 74.09 8
 -7 -6 1 77.89 7.5
 6 6 -1 1.7 2.9
 -6 -6 1 1.2 3.4
 5 6 -1 4.6 3
 -5 -6 1 4.1 3.1
 4 6 -1 294.47 22.8
 -4 -6 1 335.97 23.1
 3 6 -1 41.5 5
 -3 -6 1 50.79 5.6
 -2 -6 1 35.5 4.4
 -1 -6 1 709.83 48
 0 -6 1 -0.1 1.4
 1 -6 1 519.65 35.1
 2 -6 1 48.6 4.4
 3 -6 1 427.06 29
 4 -6 1 79.49 6.3
 -5 6 -1 216.48 15.2
 5 -6 1 201.88 14.8
 -6 6 -1 96.39 7.8
 -6 6 -1 83.99 9.5
 6 -6 1 91.59 7.4
 -7 6 -1 295.37 22.4
 -7 6 -1 240.58 22.6
 -7 6 -1 313.47 20.1
 -7 6 -1 332.97 22.2
 7 -6 1 281.47 20.7
 -8 6 -1 433.46 29.5
 -8 6 -1 463.65 31.6
 8 -6 1 408.76 30.3
 -9 6 -1 10.2 2.1
 -9 6 -1 15.1 4
 9 -6 1 11.8 3.1
 -10 6 -1 9 3.4
 -10 6 -1 8.5 2
 -11 6 -1 9.2 3.2
 -12 6 -1 49.3 5.4
 9 5 -1 5.3 2.6
 -9 -5 1 9.4 2.8
 8 5 -1 73.39 7.8
 -8 -5 1 74.39 7.3
 -7 -5 1 266.07 19.7
 -6 -5 1 534.45 36.6
 -6 -5 1 518.35 37.4
 5 5 -1 6.3 3
 -5 -5 1 9.2 3.2
 4 5 -1 -0.1 1.9
 -4 -5 1 0.3 2.1
 3 5 -1 141.49 11.2
 -3 -5 1 150.18 11.5
 2 5 -1 31 3.8
 -2 -5 1 40 4.4
 1 5 -1 156.38 10.3
 1 5 -1 122.79 10.2
 -1 -5 1 154.38 10.7
 0 -5 1 5.1 1.5
 -1 5 -1 501.05 33.6
 1 -5 1 498.75 33.6
 -2 5 -1 3170.08 207.28
 2 -5 1 3123.09 207.38
 -3 5 -1 3768.22 244.18
 3 -5 1 3644.54 244.18
 -4 5 -1 975.1 63.79
 4 -5 1 933.21 63.49
 -5 5 -1 343.67 24.5
 5 -5 1 362.36 24.3
 -6 5 -1 19.5 3.2
 6 -5 1 22.5 3.1
 -7 5 -1 36.3 5.1
 7 -5 1 31.1 4
 -8 5 -1 61.79 6.7
 -8 5 -1 54.19 5.1
 8 -5 1 62.29 6.1
 -9 5 -1 259.77 18.6
 -9 5 -1 282.77 20.5
 9 -5 1 252.97 19.6
 -10 5 -1 112.19 10.7
 -10 5 -1 128.89 9.5
 -11 5 -1 131.99 9.9
 -11 5 -1 121.99 10.8
 -12 5 -1 0.4 1.8
 10 4 -1 23.1 3.8
 -10 -4 1 23.1 3.4
 9 4 -1 28.6 4.6
 -9 -4 1 26.7 4.3
 -8 -4 1 18.7 3.8
 -7 -4 1 182.18 14.2
 6 4 -1 164.78 13.2
 -6 -4 1 156.58 12.6
 -6 -4 1 163.98 13.5
 5 4 -1 301.97 21.9
 -5 -4 1 305.77 22.3
 4 4 -1 50.49 5
 -4 -4 1 41.4 5.3
 3 4 -1 615.24 41
 -3 -4 1 595.74 41.4
 2 4 -1 40 3.9
 -2 -4 1 45.1 4.5
 1 4 -1 746.33 48.2
 -1 -4 1 695.73 48.3
 0 4 -1 1.2 0.9
 0 -4 1 0.2 1.1
 -1 4 -1 178.58 12.6
 1 -4 1 189.08 12.7
 -2 4 -1 3151.98 209.48
 2 -4 1 3215.08 209.58
 3 -4 1 1713.33 113.09
 -4 4 -1 95.69 8.1
 4 -4 1 118.39 8
 -5 4 -1 30.9 3.4
 5 -4 1 26.8 3.1
 -6 4 -1 425.86 29.5
 -6 4 -1 413.46 28.9
 6 -4 1 408.36 28.6
 7 -4 1 738.43 50.09
 -8 4 -1 76.89 7.3
 -8 4 -1 69.49 5.9
 8 -4 1 63.89 6.6
 -9 4 -1 319.37 22.1
 -9 4 -1 322.17 23.4
 9 -4 1 304.77 23.1
 -10 4 -1 20.1 4
 -10 4 -1 21.5 3.3
 -11 4 -1 126.09 9.7
 -11 4 -1 117.99 10.3
 10 3 -1 16.8 3.5
 -10 -3 1 19.4 3.2
 -9 -3 1 15.7 3.4
 -8 -3 1 -1.5 2.2
 7 3 -1 11.1 3.4
 -7 -3 1 7.8 2.8
 6 3 -1 226.98 17.8
 6 3 -1 248.38 18
 -6 -3 1 240.08 17.3
 -6 -3 1 247.58 18.4
 5 3 -1 65.89 6.2
 5 3 -1 69.19 6.3
 -5 -3 1 66.19 6.8
 4 3 -1 1025.1 70.69
 4 3 -1 1113.29 70.69
 -4 -3 1 1030.3 71.09
 3 3 -1 60.59 5.3
 3 3 -1 66.49 5.4
 -3 -3 1 62.49 5.9
 2 3 -1 269.67 18.5
 2 3 -1 277.57 18.5
 -2 -3 1 262.57 18.8
 1 3 -1 199.48 13.9
 -1 -3 1 205.78 14.1
 0 3 -1 31.6 2.7
 0 -3 1 30 2.9
 -1 3 -1 861.21 56.79
 -2 3 -1 258.47 17.3
 2 -3 1 248.48 17
 -3 3 -1 2055.39 132.59
 3 -3 1 1959.7 132.39
 -4 3 -1 382.76 26
 4 -3 1 377.56 25.7
 -5 3 -1 380.56 26.2
 5 -3 1 377.86 25.9
 -6 3 -1 1262.57 83.89
 6 -3 1 1243.58 83.59
 7 -3 1 596.74 40.9
 -8 3 -1 170.98 12.9
 -8 3 -1 176.18 14
 8 -3 1 188.88 14
 -9 3 -1 55.99 5.5
 -9 3 -1 52.99 6.3
 9 -3 1 61.09 6.5
 -10 3 -1 51.79 6
 -10 3 -1 59.39 5.7
 -11 3 -1 124.99 10
 -12 3 -1 -1.8 1.7
 -11 -2 1 6.7 2.2
 -10 -2 1 4 2.3
 -9 -2 1 9.2 2.9
 8 2 -1 96.99 9.8
 8 2 -1 103.19 9.6
 -8 -2 1 108.89 9
 7 2 -1 631.94 43.9
 7 2 -1 616.54 43.9
 -7 -2 1 653.33 43.1
 6 2 -1 1.2 1.7
 -6 -2 1 0.9 2.4
 5 2 -1 29.3 3.7
 -5 -2 1 28.3 4.3
 4 2 -1 627.64 43
 -4 -2 1 647.84 43.4
 3 2 -1 9.7 1.8
 -3 -2 1 7.9 2
 2 2 -1 254.37 17.1
 -2 -2 1 247.18 17.2
 1 2 -1 5100.99 328.87
 -1 -2 1 4903.41 329.07
 0 2 -1 936.41 61.79
 -1 2 -1 30.8 2.5
 1 -2 1 28.5 2.5
 -2 2 -1 305.47 20.6
 3 -2 1 152.08 10.6
 -4 2 -1 124.09 10.2
 4 -2 1 160.38 10.2
 -5 2 -1 150.08 11.5
 5 -2 1 165.68 11.5
 -6 2 -1 668.73 47
 6 -2 1 723.03 47.1
 -7 2 -1 2.4 1.3
 7 -2 1 1 1.6
 -8 2 -1 -1.1 1.4
 -8 2 -1 2 2.1
 8 -2 1 0.9 1.8
 -9 2 -1 72.19 7.5
 -9 2 -1 82.19 7
 9 -2 1 87.49 8
 -10 2 -1 189.48 14.3
 -11 2 -1 10.8 2.9
 -12 2 -1 -2 1.7
 -11 -1 1 0.4 2
 -10 -1 1 3.4 2.5
 -9 -1 1 48.2 5.7
 8 1 -1 0.3 2.3
 -8 -1 1 2.2 1.8
 7 1 -1 223.08 16
 -7 -1 1 194.08 15
 6 1 -1 50.69 5.4
 -6 -1 1 53.89 6.1
 5 1 -1 140.59 10.5
 -5 -1 1 133.39 10.9
 4 1 -1 773.62 50.09
 -4 -1 1 718.83 50.19
 3 1 -1 24.9 2.7
 -3 -1 1 25.1 2.6
 -3 -1 1 27.4 3
 2 1 -1 2284.27 144.09
 -2 -1 1 2075.59 144.09
 -2 -1 1 2187.88 143.99
 0 1 -1 77.59 5.3
 0 1 -1 76.99 5.2
 -1 1 -1 1820.12 117.19
 1 -1 1 1727.83 117.19
 2 -1 1 839.42 55.59
 -3 1 -1 82.69 6.5
 3 -1 1 86.69 6.3
 -4 1 -1 52.89 4.3
 -4 1 -1 48.5 4.3
 -4 1 -1 53.39 4.8
 4 -1 1 53.79 4.5
 -5 1 -1 362.06 24
 -5 1 -1 322.77 24.2
 5 -1 1 354.56 24
 6 -1 1 143.39 11.1
 -7 1 -1 5.8 1.7
 7 -1 1 2.8 2
 -8 1 -1 1.4 1.6
 8 -1 1 -0.3 1.8
 -9 1 -1 3.5 2
 9 -1 1 3.9 2.6
 -10 1 -1 102.89 8.9
 -11 1 -1 15.5 3
 -12 1 -1 6.4 2.2
 -11 0 1 6.2 2.5
 -10 0 1 10.4 2.9
 9 0 -1 69.09 8
 -9 0 1 89.59 7.4
 8 0 -1 0.1 2
 -8 0 1 0.1 1.5
 7 0 -1 7.7 2.6
 -7 0 1 6.5 1.9
 6 0 -1 53.99 5.3
 -6 0 1 48.8 6.1
 5 0 -1 26.2 3.2
 -5 0 1 22.1 3.4
 4 0 -1 76.39 6
 -4 0 1 76.59 6.2
 -4 0 1 73.39 5.9
 3 0 -1 1520.15 99.99
 -3 0 1 1522.25 99.99
 -3 0 1 1493.25 99.99
 2 0 -1 697.03 45
 -2 0 1 658.23 45
 -1 0 -1 1125.19 74.39
 -1 0 -1 1132.29 74.39
 -2 0 -1 1007.4 68.39
 -2 0 -1 1065.59 68.49
 2 0 1 1035.5 68.49
 -3 0 -1 36.2 3.7
 -3 0 -1 33.3 2.9
 -3 0 -1 34.7 3.1
 3 0 1 36.3 3.2
 -4 0 -1 77.99 6
 -4 0 -1 67.49 6.3
 4 0 1 75.49 6
 -5 0 -1 102.99 9
 5 0 1 120.29 8.9
 6 0 1 249.18 18
 -7 0 -1 68.99 6.2
 7 0 1 80.09 7.2
 -8 0 -1 17.9 3.1
 8 0 1 26.7 4.4
 -9 0 -1 96.19 8.3
 9 0 1 94.09 11.1
 9 0 1 88.19 10.2
 -10 0 -1 127.19 10.5
 -11 0 -1 20.9 3.2
 -12 1 1 0.9 1.7
 -11 1 1 56.09 5.8
 -10 1 1 77.89 7.2
 9 -1 -1 676.93 46.6
 -9 1 1 665.33 45.6
 8 -1 -1 -0.1 2
 -8 1 1 3.5 1.6
 7 -1 -1 75.39 7.1
 -7 1 1 77.59 6.3
 6 -1 -1 549.85 37.6
 -6 1 1 549.95 38.1
 5 -1 -1 34.8 3.7
 -5 1 1 33.3 3.9
 -5 1 1 30.8 3.4
 4 -1 -1 1587.04 106.29
 -4 1 1 1623.54 106.39
 3 -1 -1 921.31 62.09
 -3 1 1 949.6 62.19
 2 -1 -1 40.4 3.2
 1 -1 -1 872.61 58.09
 -1 1 1 887.01 58.09
 -1 -1 -1 21.4 1.9
 -2 -1 -1 20 2.5
 -2 -1 -1 17.2 2
 2 1 1 16.3 2
 -3 -1 -1 158.28 11
 -3 -1 -1 147.99 11.3
 3 1 1 153.28 11
 -4 -1 -1 16.8 2.3
 -4 -1 -1 11.6 2.5
 4 1 1 11.9 2.2
 -5 -1 -1 112.99 9.6
 5 1 1 121.79 9.3
 -6 -1 -1 3.2 2.9
 6 1 1 3.3 1.8
 -7 -1 -1 20.6 3.2
 7 1 1 18.3 3.7
 -8 -1 -1 145.39 10.8
 8 1 1 122.29 11.3
 8 1 1 129.29 11.3
 -9 -1 -1 11.4 2.8
 -10 -1 -1 0.3 2.1
 -11 -1 -1 -2.2 1.9
 -12 2 1 0.3 1.8
 -11 2 1 17.5 3.3
 -10 2 1 53.49 5.5
 9 -2 -1 332.97 25
 -9 2 1 346.37 24.7
 -9 2 1 346.57 24
 8 -2 -1 2.1 2.1
 -8 2 1 5.7 2.4
 -8 2 1 3.1 1.6
 7 -2 -1 4.9 2.1
 -7 2 1 4.3 1.5
 6 -2 -1 71.19 6.3
 5 -2 -1 17.1 2.6
 -5 2 1 14.5 2.6
 4 -2 -1 28.6 3
 -4 2 1 27.9 3
 3 -2 -1 434.36 28.4
 -3 2 1 422.76 28.4
 -3 2 1 404.66 28.4
 2 -2 -1 34.3 3.1
 -2 2 1 33.7 3.1
 1 -2 -1 942.11 62.19
 0 -2 -1 616.44 41.2
 -1 -2 -1 1293.07 84.09
 1 2 1 1248.48 83.99
 -2 -2 -1 234.18 16
 -2 -2 -1 230.28 16.2
 2 2 1 235.08 15.9
 2 2 1 222.48 15.9
 -3 -2 -1 710.93 48
 3 2 1 713.53 47.7
 -4 -2 -1 472.05 32.5
 4 2 1 471.05 32.2
 -5 -2 -1 8.7 2.6
 5 2 1 8.7 2.2
 -6 -2 -1 47.4 5
 -6 -2 -1 47.1 5.9
 6 2 1 51.69 5.6
 6 2 1 52.29 5.6
 -7 -2 -1 27.2 4
 7 2 1 29.4 4.7
 7 2 1 30.1 4.6
 -8 -2 -1 90.89 8.3
 8 2 1 92.89 9.3
 -9 -2 -1 104.99 9.1
 -10 -2 -1 20.4 3.3
 -11 -2 -1 3.5 1.9
 -12 3 1 7.2 2.1
 -11 3 1 2 2.2
 -10 3 1 0.7 2.1
 -10 3 1 1.4 1.7
 9 -3 -1 93.59 8.8
 -9 3 1 92.39 7.6
 -9 3 1 91.79 8.6
 8 -3 -1 22.7 3.8
 -8 3 1 20 2.9
 -8 3 1 20.1 3.7
 7 -3 -1 127.09 10.1
 -7 3 1 125.09 10.1
 -7 3 1 120.79 11.9
 6 -3 -1 166.88 12.2
 -6 3 1 159.68 12.2
 5 -3 -1 12.5 2.2
 -5 3 1 14 2.3
 4 -3 -1 10.6 1.8
 -4 3 1 11.3 1.8
 -4 3 1 8.9 1.8
 3 -3 -1 985.1 65.69
 -3 3 1 996.6 65.79
 2 -3 -1 1200.78 80.29
 -2 3 1 1225.08 80.19
 1 -3 -1 2777.32 183.08
 0 -3 -1 2825.82 191.88
 0 3 1 2998.3 191.88
 -1 -3 -1 439.96 29.8
 1 3 1 441.16 29.7
 -2 -3 -1 875.41 57.39
 2 3 1 839.52 57.09
 -3 -3 -1 255.97 18.3
 3 3 1 255.17 18
 3 3 1 257.87 18
 -4 -3 -1 53.49 5.4
 4 3 1 56.99 5.1
 4 3 1 43.3 4.9
 -5 -3 -1 94.19 8.3
 5 3 1 90.89 8.1
 5 3 1 92.39 8
 -6 -3 -1 18.2 4
 -6 -3 -1 24 3.4
 6 3 1 21.4 3.9
 -7 -3 -1 6.7 2.6
 7 3 1 4.8 3.1
 -8 -3 -1 185.38 14.4
 -9 -3 -1 41.4 5.2
 -10 -3 -1 2.1 2.2
 10 3 1 5.7 2.5
 -12 4 1 22.7 3.2
 -11 4 1 71.29 6.9
 -11 4 1 69.39 6.4
 -10 4 1 -0.6 2.2
 -10 4 1 -0.4 1.6
 9 -4 -1 24.5 4.3
 -9 4 1 24.9 3.4
 -9 4 1 33 4.8
 8 -4 -1 106.49 8.5
 -8 4 1 93.19 7.4
 -8 4 1 77.09 8.5
 7 -4 -1 806.22 53.49
 -7 4 1 777.52 53.49
 -7 4 1 804.32 53.59
 -7 4 1 762.52 55.39
 6 -4 -1 824.12 55.89
 -6 4 1 835.72 55.99
 5 -4 -1 750.12 51.29
 -5 4 1 776.52 51.29
 4 -4 -1 216.88 16
 -4 4 1 241.58 16
 3 -4 -1 7.4 1.5
 -3 4 1 2.4 1.2
 -3 4 1 3.3 1.2
 2 -4 -1 97.49 7.2
 -2 4 1 98.09 7.1
 1 -4 -1 1104.59 69.19
 -1 4 1 979 68.99
 0 -4 -1 2046.8 133.69
 0 4 1 1996.4 133.59
 -1 -4 -1 1.2 1.4
 1 4 1 1 1.3
 -2 -4 -1 93.39 7.4
 2 4 1 89.49 7.2
 -3 -4 -1 3.2 1.9
 3 4 1 3.5 1.7
 -4 -4 -1 0.4 2
 4 4 1 2.4 1.9
 -5 -4 -1 485.05 33.6
 -5 -4 -1 466.95 33
 5 4 1 478.25 33.4
 -6 -4 -1 15.7 3.9
 -6 -4 -1 11.6 3.1
 6 4 1 17.3 4
 -7 -4 -1 142.19 10.8
 7 4 1 109.69 11.3
 -8 -4 -1 268.27 19.7
 -9 -4 -1 43.6 5.1
 -10 -4 -1 54.29 5.1
 10 4 1 51.09 5.4
 -12 5 1 3.5 2.1
 -12 5 1 -0.5 1.8
 -11 5 1 128.79 9.9
 -11 5 1 124.09 10.8
 -10 5 1 38.3 5.8
 -10 5 1 46.1 4.6
 9 -5 -1 15.3 3.6
 -9 5 1 19.9 4.2
 -9 5 1 20.8 3.1
 8 -5 -1 84.39 7.8
 -8 5 1 94.49 8.8
 -8 5 1 84.69 9.9
 -8 5 1 77.49 6.8
 7 -5 -1 8.8 2.3
 -7 5 1 7.5 1.6
 -7 5 1 8.2 3.7
 6 -5 -1 569.64 37.3
 -6 5 1 509.15 39
 -6 5 1 555.14 37.3
 5 -5 -1 1139.39 76.49
 -5 5 1 1153.38 76.49
 4 -5 -1 93.49 7.2
 -4 5 1 90.99 7.1
 3 -5 -1 1120.69 74.49
 2 -5 -1 2552.14 168.58
 1 -5 -1 229.28 15.7
 -1 5 1 216.88 15.4
 0 -5 -1 244.28 16.5
 0 5 1 223.48 16.2
 -1 -5 -1 1413.76 90.89
 1 5 1 1317.87 90.69
 -2 -5 -1 0.1 1.7
 2 5 1 0.4 1.5
 -3 -5 -1 97.99 8.4
 3 5 1 98.19 8.3
 -4 -5 -1 98.69 9
 4 5 1 106.39 9.1
 -5 -5 -1 5.9 2.7
 -5 -5 -1 6 2.9
 5 5 1 5.1 3.1
 -6 -5 -1 17.1 3.6
 -6 -5 -1 18 4.6
 6 5 1 15.7 4.4
 -7 -5 -1 35 4.9
 -8 -5 -1 40.9 5.1
 8 5 1 43.2 6
 -9 -5 -1 19 3.3
 9 5 1 24.8 4
 -12 6 1 117.19 9.7
 -11 6 1 2.4 2.6
 -11 6 1 0.5 1.6
 -10 6 1 8.3 2
 -10 6 1 11.1 3.6
 9 -6 -1 17.8 3.8
 -9 6 1 20.6 4.4
 -9 6 1 18 2.9
 8 -6 -1 12.8 3
 -8 6 1 19.4 5.4
 -8 6 1 11.4 2.3
 -8 6 1 16.1 4.3
 7 -6 -1 43.1 4.8
 -7 6 1 37.4 6.5
 -7 6 1 37.8 3.8
 6 -6 -1 163.98 11.9
 -6 6 1 141.19 13.8
 -6 6 1 161.18 11.8
 5 -6 -1 345.57 24
 4 -6 -1 527.55 35.9
 3 -6 -1 379.26 26
 2 -6 -1 6.9 1.8
 1 -6 -1 258.37 18.2
 0 -6 -1 6.6 2.1
 -1 -6 -1 129.09 9.8
 1 6 1 120.09 9.4
 -2 -6 -1 7.5 2.4
 2 6 1 6.9 2.1
 -3 -6 -1 13.8 3.1
 3 6 1 12.1 2.9
 -4 -6 -1 102.29 8.9
 4 6 1 86.19 8.5
 -5 -6 -1 323.17 22.6
 -5 -6 -1 303.67 23.4
 -6 -6 -1 2.3 3.8
 -6 -6 -1 5.7 2.6
 -7 -6 -1 -1.4 2.4
 7 6 1 -1.4 2.7
 -8 -6 -1 16.5 3.4
 8 6 1 15.3 3.6
 -9 -6 -1 2.9 2
 9 6 1 4.6 2.3
 -12 7 1 -0.6 2
 -11 7 1 600.14 41.4
 -11 7 1 634.64 43.2
 -10 7 1 57.99 7.4
 -10 7 1 57.49 5.2
 9 -7 -1 243.88 17.9
 -9 7 1 215.78 18.6
 -9 7 1 225.38 16.6
 -9 7 1 251.27 20.9
 8 -7 -1 22.3 3.9
 -8 7 1 17.7 4.5
 -8 7 1 19.8 2.8
 -8 7 1 17 5.5
 7 -7 -1 633.54 43.2
 -7 7 1 623.84 42.3
 -7 7 1 626.34 46
 6 -7 -1 357.86 24.5
 -6 7 1 334.07 27
 5 -7 -1 204.18 14.6
 -5 7 1 192.88 17
 4 -7 -1 2410.06 159.68
 3 -7 -1 45.3 4.6
 2 -7 -1 3.9 1.8
 1 -7 -1 114.09 9.1
 0 -7 -1 114.49 9.3
 -1 -7 -1 56.89 5.9
 -2 -7 -1 -0.9 2.1
 2 7 1 -0.7 1.7
 -3 -7 -1 521.95 35.3
 3 7 1 452.65 35.1
 3 7 1 528.95 35
 -4 -7 -1 78.09 8
 4 7 1 66.19 7.8
 4 7 1 71.79 7.5
 -5 -7 -1 38.2 6.1
 5 7 1 47.7 6.2
 -6 -7 -1 66.39 6.7
 6 7 1 51.69 7
 -7 -7 -1 24.4 4.2
 7 7 1 25 4.5
 -8 -7 -1 4.8 2.5
 8 7 1 3.8 2.6
 -12 8 1 98.79 8.7
 -11 8 1 1.4 2.7
 -10 8 1 1.6 1.4
 -10 8 1 3.5 2.9
 9 -8 -1 -1.1 2.2
 -9 8 1 1.4 2.8
 -9 8 1 2.5 3.7
 -9 8 1 0.6 1.3
 8 -8 -1 1.5 2.3
 -8 8 1 0.2 1.3
 -8 8 1 2 3.4
 -8 8 1 -3.7 2.5
 7 -8 -1 162.48 12.7
 -7 8 1 166.88 11.7
 -7 8 1 147.19 15.2
 6 -8 -1 82.19 7.1
 -6 8 1 73.59 6.2
 -6 8 1 87.09 12.7
 -6 8 1 62.29 9.3
 5 -8 -1 0.4 1.6
 -5 8 1 1.2 3.1
 4 -8 -1 3.5 1.9
 -4 8 1 4.8 3.5
 3 -8 -1 1028.8 65.99
 -3 8 1 928.91 68.59
 2 -8 -1 0.3 1.8
 -2 8 1 2.1 2.6
 1 -8 -1 242.28 17.7
 0 -8 -1 5 2.3
 0 8 1 5.2 2.2
 -1 -8 -1 2.4 2.3
 1 8 1 1.6 2
 1 8 1 -1.3 2.8
 -2 -8 -1 18.1 4
 2 8 1 31.1 3.4
 2 8 1 23.7 4
 2 8 1 34 5.2
 -3 -8 -1 75.99 8.1
 3 8 1 77.19 7.5
 3 8 1 71.29 8.2
 -4 -8 -1 -1 2.9
 4 8 1 0.5 3.1
 4 8 1 -0.3 2.4
 5 8 1 13.6 5.2
 5 8 1 19.1 4.2
 6 8 1 58.59 6.9
 7 8 1 5.2 2.7
 -12 9 1 12.7 3
 -11 9 1 176.98 14.3
 -10 9 1 145.19 15.1
 -10 9 1 143.49 12.7
 -9 9 1 131.89 11.5
 -9 9 1 105.89 13.4
 -9 9 1 133.99 10
 8 -9 -1 40.4 5.7
 -8 9 1 37.1 8.1
 -8 9 1 57.09 7.2
 -8 9 1 43.6 4.2
 -7 9 1 78.89 6.4
 -7 9 1 75.89 9.8
 6 -9 -1 36 4.9
 -6 9 1 39.9 8.2
 -6 9 1 50.69 7.9
 -6 9 1 34.4 3.9
 5 -9 -1 125.99 9.8
 -5 9 1 106.39 12.8
 -5 9 1 100.49 9.3
 -5 9 1 125.49 12
 4 -9 -1 484.85 33.9
 -4 9 1 520.25 39.3
 -4 9 1 442.46 34.2
 -4 9 1 512.05 37.6
 3 -9 -1 4.3 2.3
 -3 9 1 6.8 2.8
 -3 9 1 8.5 4.3
 2 -9 -1 8.2 2.6
 -2 9 1 11.7 3.1
 -2 9 1 3.3 3.7
 1 -9 -1 81.89 7.1
 -1 9 1 53.79 7.5
 -1 9 1 68.59 6
 -1 9 1 73.49 7
 0 -9 -1 804.72 55.19
 0 9 1 797.32 55.59
 0 9 1 835.02 54.19
 0 9 1 787.42 54.89
 -1 -9 -1 83.89 8.5
 1 9 1 89.79 7.4
 1 9 1 96.99 9.3
 1 9 1 91.79 8.4
 -2 -9 -1 144.89 12.7
 2 9 1 152.18 13.2
 2 9 1 149.69 11.4
 2 9 1 154.28 12.5
 -3 -9 -1 51.69 6.9
 3 9 1 57.89 6.8
 3 9 1 56.59 7.5
 4 9 1 2 2.8
 4 9 1 -1.1 3.4
 5 9 1 31.6 4.9
 5 9 1 14 5.7
 6 9 1 1.3 2.6
 7 9 1 22.5 3.6
 -12 10 1 35.5 4.4
 -12 10 1 43 4.7
 -11 10 1 126.59 10.8
 -10 10 1 49.6 6.8
 -10 10 1 62.69 9.4
 -9 10 1 99.99 12.2
 -9 10 1 83.59 8.9
 8 -10 -1 103.09 9.1
 -8 10 1 79.29 10.8
 -8 10 1 80.89 9.1
 -8 10 1 115.29 12.8
 7 -10 -1 20.5 4
 -7 10 1 12.3 4.7
 -7 10 1 11.8 2.4
 -7 10 1 21.3 6.5
 -7 10 1 9.4 3.5
 6 -10 -1 134.29 9.9
 -6 10 1 94.89 11.4
 -6 10 1 92.49 8.9
 -6 10 1 105.29 8.2
 -5 10 1 84.69 7.3
 -5 10 1 73.19 9.8
 -5 10 1 76.39 9.7
 4 -10 -1 228.08 16.1
 -4 10 1 254.67 20.4
 -4 10 1 189.78 17.7
 -4 10 1 169.08 17.2
 -4 10 1 203.48 15.4
 -4 10 1 211.68 16.6
 3 -10 -1 133.29 10.9
 -3 10 1 113.79 12
 -3 10 1 134.09 14.5
 -3 10 1 142.79 10.3
 -3 10 1 122.59 11.1
 -3 10 1 126.19 12.5
 2 -10 -1 76.29 7.8
 -2 10 1 85.99 9.6
 -2 10 1 73.29 7.8
 -2 10 1 80.59 9.2
 -2 10 1 91.19 7.2
 1 -10 -1 266.87 20.7
 -1 10 1 290.57 20
 -1 10 1 288.47 22.3
 -1 10 1 281.47 20.7
 -1 10 1 271.67 21.6
 0 -10 -1 118.59 10.4
 0 10 1 112.59 9.2
 0 10 1 122.99 10.2
 0 10 1 111.59 11.3
 -1 -10 -1 284.37 21.3
 1 10 1 268.47 19.9
 1 10 1 269.67 21.7
 1 10 1 296.67 21.1
 -2 -10 -1 127.49 12.1
 2 10 1 134.89 10.6
 2 10 1 142.99 12
 2 10 1 138.19 12.7
 3 10 1 219.58 17.1
 3 10 1 213.58 18
 4 10 1 71.59 7.8
 4 10 1 75.19 8.9
 5 10 1 52.39 6.3
 6 10 1 4.4 2.6
 -11 11 1 14.4 3.2
 -10 11 1 7 4.2
 -10 11 1 7.6 2.9
 -9 11 1 19.9 6.1
 -9 11 1 16.8 3.9
 -8 11 1 39 7.3
 -8 11 1 36.3 5.3
 7 -11 -1 150.58 12.4
 -7 11 1 135.79 12.1
 -7 11 1 142.99 14
 -7 11 1 151.78 16.3
 6 -11 -1 30.9 4.7
 -6 11 1 23.4 7.1
 5 -11 -1 232.58 19.2
 -5 11 1 295.57 22.1
 -5 11 1 250.37 21.3
 -5 11 1 290.27 19.1
 -5 11 1 223.78 22.9
 4 -11 -1 355.36 26.2
 -4 11 1 380.86 28.5
 -4 11 1 376.16 25.7
 -4 11 1 343.77 26.7
 -4 11 1 355.96 27.9
 -4 11 1 363.56 30.9
 3 -11 -1 25.4 4.1
 -3 11 1 20.4 4.2
 -3 11 1 4.9 3.9
 -3 11 1 11.8 2.8
 -3 11 1 10.8 4.5
 2 -11 -1 -0.4 2.4
 -2 11 1 0.6 3.2
 -2 11 1 -0.9 1.7
 -2 11 1 -1.2 2.4
 -2 11 1 1.5 3.4
 1 -11 -1 5.9 2.9
 -1 11 1 1.7 3.9
 -1 11 1 2.7 2
 -1 11 1 2.7 2.7
 -1 11 1 -2.4 3.2
 0 -11 -1 2.5 2.9
 0 11 1 0.1 2.5
 0 11 1 -0.4 3.7
 0 11 1 0 1.8
 -1 -11 -1 19.5 5.2
 1 11 1 18 4
 1 11 1 11.9 2.8
 1 11 1 11 5
 2 11 1 1.3 2.7
 2 11 1 7 4.3
 2 11 1 2.5 2.1
 3 11 1 45.4 6.3
 3 11 1 54.79 7.5
 4 11 1 77.89 8.1
 4 11 1 100.19 9.6
 5 11 1 5.3 2.5
 -11 12 1 11.6 2.6
 -11 12 1 11.7 2.7
 -10 12 1 26 6
 -10 12 1 19.2 3.5
 -9 12 1 4.9 4.1
 -9 12 1 12.8 4.7
 -9 12 1 13.2 3.1
 -8 12 1 0.4 3.9
 -8 12 1 1.1 2.3
 -8 12 1 2.1 3.4
 -7 12 1 0 3.6
 -7 12 1 12.4 5.9
 -6 12 1 207.98 15.1
 -6 12 1 184.58 17.2
 5 -12 -1 31.8 4.8
 -5 12 1 13.8 5.8
 -5 12 1 27.6 4.1
 4 -12 -1 19.5 4.2
 -4 12 1 19.1 5.5
 -4 12 1 19.7 3.4
 -4 12 1 23.7 5.9
 3 -12 -1 24.2 4.4
 -3 12 1 24.7 3.7
 -3 12 1 26.3 4.9
 -3 12 1 14.8 5
 -3 12 1 14 4.9
 2 -12 -1 8.5 3.3
 -2 12 1 10.9 2.7
 -2 12 1 10.5 3.7
 -2 12 1 15.4 5
 -2 12 1 8.8 4.5
 -1 12 1 93.69 9
 -1 12 1 93.79 10.8
 -1 12 1 90.89 8.1
 0 12 1 34.8 5.5
 0 12 1 39.3 7.1
 0 12 1 32.4 4.3
 1 12 1 93.79 10.5
 1 12 1 83.49 7.4
 1 12 1 80.79 8.6
 2 12 1 6.7 4.3
 2 12 1 7.4 2.3
 2 12 1 4.9 3.1
 3 12 1 16.7 4.5
 3 12 1 20.7 4
 4 12 1 9.1 2.6
 4 12 1 5.3 3.3
 -10 13 1 -0.1 1.8
 -10 13 1 0.7 1.8
 -9 13 1 28.1 5.5
 -8 13 1 -0.1 3.1
 -8 13 1 16.6 6.3
 -7 13 1 12.3 3.1
 -7 13 1 11.6 4.8
 -6 13 1 112.39 9.1
 -6 13 1 98.29 11.7
 -5 13 1 33.8 7.3
 -5 13 1 35.5 7.1
 -5 13 1 36.8 4.8
 -4 13 1 19.6 5.6
 -4 13 1 17.6 5.6
 -4 13 1 15.2 3.3
 -3 13 1 117.39 12.2
 -3 13 1 111.49 12
 -3 13 1 108.59 10.6
 -3 13 1 106.69 9.2
 -2 13 1 0 1.9
 -2 13 1 -0.7 2.7
 -2 13 1 3.9 4.2
 -2 13 1 1.1 3.6
 -1 13 1 11.6 3.7
 -1 13 1 8.9 2.6
 -1 13 1 3.8 4.4
 0 13 1 6.2 3.2
 0 13 1 9.6 4.8
 0 13 1 6.8 2.4
 1 13 1 145.69 12.7
 1 13 1 147.49 11.9
 1 13 1 189.38 14.7
 2 13 1 6.5 2.8
 2 13 1 3.1 3.6
 3 13 1 1 3.6
 3 13 1 4.6 3.2
 -9 14 1 9.8 2.4
 -9 14 1 1.9 3.1
 -8 14 1 38.3 4.6
 -7 14 1 47.6 7.4
 -7 14 1 47.6 5
 -6 14 1 232.78 17.2
 -6 14 1 240.48 19.8
 -5 14 1 18.2 3.3
 -5 14 1 13.1 5.5
 -5 14 1 12 4.8
 -4 14 1 1.5 3.9
 -4 14 1 4.7 2.4
 -4 14 1 1.5 4.8
 -3 14 1 5.8 2.5
 -3 14 1 1.3 4.7
 -3 14 1 1.3 4.1
 -2 14 1 -1.7 4.4
 -2 14 1 1.8 2.2
 -2 14 1 3.3 3.2
 -1 14 1 22.4 4.2
 -1 14 1 23.2 5.7
 -1 14 1 26.2 3.7
 0 14 1 4.1 2.1
 0 14 1 7 4.1
 0 14 1 4.4 2.8
 1 14 1 47.4 5.7
 1 14 1 49.4 4.9
 1 14 1 59.09 7
 2 14 1 -0.8 2.9
 -8 15 1 8.4 3.4
 -7 15 1 85.79 7.1
 -7 15 1 92.69 9.5
 -6 15 1 34.8 4.1
 -6 15 1 39.2 6.5
 -5 15 1 21.1 5.4
 -5 15 1 24.9 3.5
 -4 15 1 8.4 4.3
 -4 15 1 9.4 4.4
 -4 15 1 6.6 2.4
 -3 15 1 23.7 5.5
 -3 15 1 31.2 6
 -3 15 1 29.2 3.8
 -2 15 1 -1 3.7
 -2 15 1 0.9 1.9
 -1 15 1 40.7 5.9
 -1 15 1 35.3 4.1
 0 15 1 3.8 3
 0 15 1 4.3 1.9
 -6 16 1 6.4 3.3
 -6 16 1 5.9 1.7
 -5 16 1 16 4.1
 -5 16 1 14.7 2.4
 -4 16 1 19.1 4.4
 -4 16 1 21.1 2.8
 -3 16 1 3.9 1.7
 -2 16 -2 17 2.6
 -2 16 -2 18.5 4.1
 -3 16 -2 10.2 3.9
 -3 16 -2 10.2 2.2
 -4 16 -2 3.6 3.3
 -4 16 -2 2.2 1.7
 -5 16 -2 1.2 3.3
 -5 16 -2 1.2 1.5
 -6 16 -2 12.4 2.1
 -6 16 -2 8.1 3.8
 -7 16 -2 7.4 3.3
 0 15 -2 2 3
 0 15 -2 1.2 1.8
 0 15 -2 -1.3 2.8
 -1 15 -2 5.7 3.7
 -1 15 -2 8.4 2.2
 -1 15 -2 7 3.1
 -2 15 -2 80.99 8.7
 -2 15 -2 61.69 7.2
 -2 15 -2 67.59 6.3
 -3 15 -2 57.39 7.3
 -3 15 -2 64.89 6.3
 -3 15 -2 75.09 8.7
 -3 15 -2 74.59 9
 -4 15 -2 10.7 2.6
 -4 15 -2 10.4 3.4
 -4 15 -2 7.8 4.7
 -4 15 -2 10.1 4.6
 -5 15 -2 6.6 4.2
 -5 15 -2 5.5 2.4
 -6 15 -2 -1.1 1.6
 -6 15 -2 1.5 3.6
 -7 15 -2 11.6 2.5
 -7 15 -2 19.1 4.8
 -8 15 -2 16.1 4.2
 2 14 -2 0.1 2.6
 1 14 -2 -0.1 2.5
 1 14 -2 0.5 3.2
 0 14 -2 31 3.9
 0 14 -2 27.6 4.7
 0 14 -2 30.7 5.7
 -1 14 -2 79.39 6.9
 -1 14 -2 59.19 7.6
 -1 14 -2 88.29 9.4
 -2 14 -2 13.3 3
 -2 14 -2 9.3 5.8
 -2 14 -2 17.5 5.2
 -2 14 -2 9.8 3.7
 -3 14 -2 21.5 5.6
 -3 14 -2 17.7 3.4
 -3 14 -2 20.7 5.8
 -3 14 -2 17.3 4.4
 -4 14 -2 50.49 6.9
 -4 14 -2 44.1 7.5
 -4 14 -2 52.49 5.7
 -4 14 -2 47.3 8
 -5 14 -2 3.4 3.2
 -5 14 -2 1 2.2
 -5 14 -2 -0.3 3.8
 -6 14 -2 5.2 2.4
 -6 14 -2 8.3 4.6
 -7 14 -2 1.8 2.2
 -7 14 -2 3.8 2.5
 -7 14 -2 0.7 3.5
 -8 14 -2 27.1 4
 -8 14 -2 26.1 5.5
 -9 14 -2 1.3 3.3
 -9 14 -2 5.7 2.3
 -10 14 -2 1.2 1.6
 3 13 -2 11 3.1
 3 13 -2 15.8 3.7
 2 13 -2 85.29 8.7
 2 13 -2 67.19 7.6
 1 13 -2 4.4 3.1
 1 13 -2 -0.2 3.8
 1 13 -2 0 2
 0 13 -2 5.5 3.3
 0 13 -2 7.8 2.5
 0 13 -2 9.8 4.6
 -1 13 -2 43.9 7
 -1 13 -2 38.7 4.6
 -1 13 -2 30.6 5.5
 -2 13 -2 8.5 3.5
 -2 13 -2 -2.2 3.8
 -2 13 -2 4.2 3.7
 -2 13 -2 5.3 2.5
 -3 13 -2 -0.1 3.8
 -3 13 -2 5.4 4.2
 -3 13 -2 4.1 3.6
 -3 13 -2 2.4 2.3
 -4 13 -2 2.3 4.4
 -4 13 -2 10.6 2.9
 -4 13 -2 5.6 3.6
 -4 13 -2 7.1 4.4
 -5 13 -2 23.7 3.9
 -5 13 -2 22.1 5
 -6 13 -2 -0.3 2.4
 -6 13 -2 1.8 2.5
 -6 13 -2 0.3 3.6
 -7 13 -2 10 3
 -7 13 -2 6.4 2.6
 -7 13 -2 4.9 4.1
 -8 13 -2 7.2 4.3
 -8 13 -2 11.3 3
 -9 13 -2 37.2 4.4
 -9 13 -2 20.1 5.3
 -10 13 -2 50.99 5.3
 4 12 -2 0.9 2.5
 4 12 -2 -0.6 2.9
 3 12 -2 0.8 3.5
 3 12 -2 0.7 2.7
 2 12 -2 2.7 2.9
 2 12 -2 0.3 3.8
 1 12 -2 36.4 6.6
 1 12 -2 32.4 5.2
 1 12 -2 26.5 3.8
 0 12 -2 36.6 5.6
 0 12 -2 22.3 3.5
 0 12 -2 22.7 5.5
 -1 12 -2 249.58 18.6
 -1 12 -2 269.67 20
 -1 12 -2 263.37 20.6
 1 -12 2 245.88 19.5
 -2 12 -2 20.5 4.5
 -2 12 -2 24.2 5.7
 -2 12 -2 24.4 5.3
 -2 12 -2 20.1 3.4
 2 -12 2 14.3 3.6
 -3 12 -2 156.68 13.8
 -3 12 -2 139.69 10.9
 -3 12 -2 123.19 11.9
 -3 12 -2 137.59 12.8
 3 -12 2 114.99 11.1
 -4 12 -2 371.66 28.7
 -4 12 -2 400.66 27.3
 -4 12 -2 396.86 29.9
 -4 12 -2 357.96 28.3
 -5 12 -2 33.7 6.4
 -5 12 -2 57.89 8.6
 -5 12 -2 46.2 5.6
 -5 12 -2 44.6 5.5
 -6 12 -2 95.29 8.5
 -6 12 -2 76.79 8.5
 -6 12 -2 99.29 11.1
 -7 12 -2 81.99 10.2
 -7 12 -2 74.69 7.3
 -7 12 -2 81.39 12.3
 -8 12 -2 44 9.2
 -8 12 -2 70.69 9.2
 -9 12 -2 6.5 2.7
 -10 12 -2 1 2.2
 -10 12 -2 0.8 2.1
 -11 12 -2 4 2
 -11 12 -2 3.8 2
 5 11 -2 -0.3 2.9
 5 11 -2 0.4 2.5
 4 11 -2 2.2 3.5
 4 11 -2 2.3 2.9
 3 11 -2 22.9 4.6
 3 11 -2 29.4 5.8
 2 11 -2 18.8 5
 2 11 -2 12.9 3.9
 1 11 -2 3.4 3
 1 11 -2 1.9 1.7
 1 11 -2 0.2 3.4
 -1 -11 2 2.8 3.1
 0 11 -2 2.1 3.2
 0 11 -2 3.8 2.7
 0 11 -2 1 1.7
 0 -11 2 4.1 2.9
 -1 11 -2 7.6 3.5
 -1 11 -2 13.5 4.6
 -1 11 -2 11.9 2.4
 -1 11 -2 5.2 2.9
 1 -11 2 7.6 3.1
 -2 11 -2 74.39 9.7
 -2 11 -2 77.39 9.1
 -2 11 -2 96.99 9.1
 -2 11 -2 82.59 7.6
 2 -11 2 103.89 8.4
 -3 11 -2 67.09 6.2
 -3 11 -2 57.79 7.3
 -3 11 -2 65.49 8
 -3 11 -2 56.99 7.9
 -3 11 -2 59.39 8.5
 3 -11 2 58.99 6.6
 -4 11 -2 14 4.8
 -4 11 -2 20.5 4.8
 -4 11 -2 25.7 5.4
 -4 11 -2 17.5 3.5
 -4 11 -2 16.7 5.1
 -5 11 -2 2.6 3.3
 -5 11 -2 5.4 2.6
 -5 11 -2 5.1 4.2
 -5 11 -2 -1.9 4.2
 -5 11 -2 2.1 3.4
 -6 11 -2 -2.9 3.6
 -6 11 -2 25.3 6.9
 -6 11 -2 5.6 2.6
 -7 11 -2 1.6 2.3
 -7 11 -2 1.9 3.8
 -7 11 -2 6.7 4.8
 -8 11 -2 -0.6 2.3
 -8 11 -2 -2.3 3.7
 -8 11 -2 5 4.3
 -9 11 -2 201.78 15.3
 -9 11 -2 185.58 18
 -10 11 -2 40.5 5.4
 -11 11 -2 13.1 3
 -11 11 -2 14.5 2.9
 6 10 -2 36.1 4.8
 5 10 -2 43.8 5.9
 5 10 -2 36 5.7
 4 10 -2 551.44 39.5
 4 10 -2 569.84 39.9
 3 10 -2 66.49 8.2
 3 10 -2 57.19 7.3
 2 10 -2 87.99 9.2
 2 10 -2 106.49 10.2
 -2 -10 2 89.29 9.5
 1 10 -2 122.09 10.5
 1 10 -2 108.59 10.8
 1 10 -2 115.79 9.3
 -1 -10 2 118.99 10.6
 0 10 -2 7.1 2.7
 0 10 -2 5.3 3.1
 0 10 -2 6.1 2
 0 10 -2 1.6 2.4
 0 -10 2 5.4 2.8
 -1 10 -2 149.59 12
 -1 10 -2 133.09 13.2
 -1 10 -2 148.09 11.2
 -1 10 -2 136.29 12.2
 1 -10 2 156.38 11.9
 -2 10 -2 331.27 23.2
 -2 10 -2 335.37 24.5
 -2 10 -2 293.27 23.2
 -2 10 -2 330.37 22.2
 -2 10 -2 273.97 23.2
 2 -10 2 314.57 22.5
 -3 10 -2 239.58 21.7
 -3 10 -2 321.37 23
 -3 10 -2 287.57 21.7
 -3 10 -2 282.67 21.8
 -3 10 -2 325.37 20.8
 3 -10 2 275.67 20.6
 -4 10 -2 2.5 2.1
 -4 10 -2 3.9 4.1
 -4 10 -2 2.4 3
 -4 10 -2 0.5 2.9
 -4 10 -2 2.8 3.1
 4 -10 2 4.1 2.3
 -5 10 -2 16.5 5.8
 -5 10 -2 26.4 5.5
 -5 10 -2 27.3 5.2
 -5 10 -2 32.9 6.3
 -5 10 -2 26.4 4.1
 -6 10 -2 2.3 3.8
 -6 10 -2 0.7 3.4
 -6 10 -2 6.1 2.7
 -6 10 -2 7.1 4.4
 -7 10 -2 189.88 14.7
 -7 10 -2 208.68 15.5
 -7 10 -2 198.08 17.8
 -7 10 -2 183.68 18.4
 -8 10 -2 137.29 14.4
 -8 10 -2 153.88 12.3
 -8 10 -2 135.99 14.9
 -9 10 -2 3.2 2.7
 -10 10 -2 52.69 6.7
 -11 10 -2 2.4 2.4
 -11 10 -2 2.4 2.5
 -12 10 -2 7.8 3.9
 -12 10 -2 9.6 2.6
 7 9 -2 5.4 2.7
 6 9 -2 7.3 3.6
 6 9 -2 21 4.1
 5 9 -2 2.8 3.3
 5 9 -2 2.8 2.8
 4 9 -2 42.1 6.3
 4 9 -2 40 5.8
 3 9 -2 0.3 3.1
 3 9 -2 2.8 2.5
 -3 -9 2 -1.5 2.9
 2 9 -2 12.2 3.4
 2 9 -2 14 4.1
 2 9 -2 16.9 3.7
 -2 -9 2 13.5 3.8
 1 9 -2 447.06 33.8
 1 9 -2 507.85 33.4
 1 9 -2 506.65 34.3
 1 9 -2 481.45 34.6
 -1 -9 2 488.85 34.3
 0 9 -2 538.15 36.8
 0 9 -2 492.25 37.7
 0 9 -2 562.14 37.6
 0 -9 2 567.64 37.5
 -1 9 -2 387.56 27.8
 1 -9 2 393.96 27.4
 -2 9 -2 30.8 4.7
 -2 9 -2 33.8 5.2
 2 -9 2 28.6 3.9
 -3 9 -2 22.4 5.9
 -3 9 -2 18.7 4
 3 -9 2 19 3.2
 -4 9 -2 324.97 27.5
 -4 9 -2 360.56 25.8
 4 -9 2 364.86 24.6
 -5 9 -2 257.87 19.8
 -5 9 -2 206.48 21.3
 -5 9 -2 287.97 19
 -5 9 -2 302.57 21.7
 5 -9 2 256.37 18.7
 -6 9 -2 80.09 9.8
 -6 9 -2 107.19 8.7
 -6 9 -2 63.29 10.1
 -6 9 -2 101.09 8
 -6 9 -2 103.79 10.7
 6 -9 2 77.19 7.8
 -7 9 -2 214.68 17.5
 -7 9 -2 181.28 19
 -7 9 -2 239.58 20.6
 -7 9 -2 274.37 20.2
 -8 9 -2 21.2 6.3
 -8 9 -2 10.1 3.6
 -9 9 -2 60.29 7.2
 -10 9 -2 153.48 13.2
 -11 9 -2 18.9 4.1
 -12 9 -2 8.3 2.6
 -12 9 -2 4.8 2.5
 7 8 -2 0.4 2.4
 6 8 -2 22.7 4.7
 6 8 -2 30.6 5
 5 8 -2 18.6 4.5
 5 8 -2 15.4 3.9
 4 8 -2 398.36 27.2
 4 8 -2 375.36 27.4
 -4 -8 2 339.67 27.2
 3 8 -2 24.5 4.8
 3 8 -2 27 4.4
 -3 -8 2 27.2 4.8
 2 8 -2 69.19 7.6
 2 8 -2 75.49 7.2
 2 8 -2 81.59 7.5
 -2 -8 2 78.49 7.7
 1 8 -2 949.8 64.59
 -1 -8 2 960.4 64.59
 0 8 -2 137.59 10.8
 0 -8 2 130.99 10.5
 -1 8 -2 194.48 15.5
 1 -8 2 214.18 14.9
 -2 8 -2 114.29 12.2
 2 -8 2 122.19 9.3
 -3 8 -2 26.4 5.5
 -4 8 -2 40.5 6.9
 -4 8 -2 31.7 6.6
 4 -8 2 31.5 3.8
 -5 8 -2 14.5 4.6
 -5 8 -2 22.4 4.1
 5 -8 2 19 2.9
 -6 8 -2 109.49 12.2
 -6 8 -2 113.69 11.6
 6 -8 2 128.69 9.5
 -7 8 -2 6.7 4.1
 -7 8 -2 3.4 3.5
 -7 8 -2 9.3 3.2
 7 -8 2 10.1 2.5
 -8 8 -2 3.1 4
 -8 8 -2 2.7 5
 -8 8 -2 8.7 3.4
 8 -8 2 5.3 2.2
 -9 8 -2 84.99 9.2
 9 -8 2 96.99 8.6
 -10 8 -2 39.1 5.9
 -11 8 -2 8.8 3.3
 -12 8 -2 25.8 4.1
 8 7 -2 109.59 9.3
 7 7 -2 3.5 2.8
 6 7 -2 1.8 2.8
 6 7 -2 4.8 3.3
 5 7 -2 57.29 7.2
 5 7 -2 64.89 7
 -5 -7 2 53.89 7.3
 4 7 -2 170.28 13.7
 4 7 -2 176.88 14.1
 -4 -7 2 165.08 14.1
 3 7 -2 54.59 6.1
 3 7 -2 51.19 6.6
 3 7 -2 58.69 6
 -3 -7 2 60.79 6.6
 2 7 -2 527.25 36.9
 -2 -7 2 545.35 37.1
 -1 -7 2 4.8 2.1
 0 7 -2 249.58 18.8
 0 -7 2 272.97 18.5
 1 -7 2 153.38 11.3
 2 -7 2 10 1.9
 3 -7 2 91.49 7.2
 4 -7 2 9.9 1.9
 -5 7 -2 10.5 3.9
 -6 7 -2 2.1 3.1
 6 -7 2 5.2 1.9
 -7 7 -2 285.87 21.3
 -7 7 -2 246.08 21.5
 -7 7 -2 226.98 19.6
 7 -7 2 283.77 19
 -8 7 -2 25.7 5.1
 8 -7 2 30.9 4.2
 -9 7 -2 7 3.4
 9 -7 2 13.7 3.1
 -10 7 -2 301.87 23
 -11 7 -2 2.2 2.6
 -12 7 -2 49.6 5.6
 9 6 -2 9.9 2.7
 -9 -6 2 7.3 2.4
 8 6 -2 5 2.7
 -8 -6 2 7.3 2.8
 7 6 -2 4.8 3.1
 6 6 -2 273.87 21.7
 6 6 -2 312.07 22
 -6 -6 2 292.67 22.4
 5 6 -2 15.4 4
 5 6 -2 12.8 3.5
 -5 -6 2 14 4
 4 6 -2 122.29 10.2
 4 6 -2 126.89 9.9
 4 6 -2 100.59 9.4
 -4 -6 2 101.89 9.9
 3 6 -2 13 3
 -3 -6 2 12.5 3.2
 -2 -6 2 40 4.8
 -1 -6 2 1298.17 86.59
 0 6 -2 60.39 5.6
 0 -6 2 61.09 5.3
 1 -6 2 330.97 22.6
 -2 6 -2 146.99 11.1
 2 -6 2 169.18 11.2
 -3 6 -2 4795.82 333.37
 3 -6 2 5336.07 333.47
 -4 6 -2 624.64 41.3
 4 -6 2 598.04 41
 -5 6 -2 2.9 1.7
 5 -6 2 0.1 1.2
 -6 6 -2 357.96 25.1
 -6 6 -2 346.17 23.5
 -6 6 -2 286.57 24.9
 6 -6 2 338.97 23.1
 -7 6 -2 195.58 15
 -7 6 -2 156.98 12.5
 -7 6 -2 169.58 14
 7 -6 2 174.78 13.1
 -8 6 -2 6 1.7
 -8 6 -2 6.8 3.1
 8 -6 2 10.2 2.7
 -9 6 -2 101.39 9.8
 -9 6 -2 87.79 7.7
 9 -6 2 115.79 9.2
 -10 6 -2 177.78 13.6
 -10 6 -2 202.98 15.7
 -11 6 -2 70.59 7.5
 -12 6 -2 1.3 2.1
 9 5 -2 3.7 2.3
 -9 -5 2 3.3 2.3
 8 5 -2 1.6 2.7
 -8 -5 2 0.5 2.5
 7 5 -2 18.3 4
 -7 -5 2 12.8 3.8
 -6 -5 2 5.5 3.4
 5 5 -2 100.19 9.2
 -5 -5 2 101.29 9.6
 -4 -5 2 15.3 3.6
 3 5 -2 68.99 6.4
 -3 -5 2 68.09 6.6
 2 5 -2 -1 1.7
 -2 -5 2 1.6 1.9
 1 5 -2 488.55 36.6
 -1 -5 2 609.74 37.1
 0 -5 2 422.76 28.6
 -1 5 -2 40.4 3.6
 1 -5 2 42.8 3.6
 -2 5 -2 95.79 7.4
 2 -5 2 115.99 7.6
 -3 5 -2 243.88 17.1
 3 -5 2 247.68 16.8
 -4 5 -2 974.6 64.09
 4 -5 2 944.71 63.69
 -5 5 -2 416.66 28.2
 5 -5 2 401.76 27.8
 -6 5 -2 125.59 10.2
 -6 5 -2 132.89 11.1
 6 -5 2 127.69 9.8
 -7 5 -2 19.9 4
 7 -5 2 11.7 2.6
 -8 5 -2 26 3.2
 -8 5 -2 28.5 4.8
 8 -5 2 28.1 4
 -9 5 -2 44.7 4.8
 -9 5 -2 48.1 6.6
 9 -5 2 60.49 6.1
 -10 5 -2 99.59 9.2
 -10 5 -2 86.69 7.7
 -11 5 -2 3.6 2.5
 -11 5 -2 -1.6 1.9
 -12 5 -2 92.29 7.9
 -10 -4 2 36.1 4.3
 9 4 -2 35.4 5
 -9 -4 2 38.9 4.7
 -8 -4 2 4.1 2.8
 -7 -4 2 44.3 5.4
 -7 -4 2 31.4 5.8
 6 4 -2 508.45 35.8
 -6 -4 2 522.55 36.4
 -6 -4 2 504.55 35.3
 5 4 -2 36.3 4.7
 -5 -4 2 34.8 5.1
 4 4 -2 5.8 2.1
 -4 -4 2 8.5 2.8
 3 4 -2 42.3 4.3
 -3 -4 2 42.8 5
 2 4 -2 23.9 2.6
 -2 -4 2 14.1 2.7
 1 4 -2 363.46 24.5
 1 4 -2 362.76 24.5
 -1 -4 2 358.66 24.7
 0 4 -2 37.8 3.3
 0 -4 2 38.7 3.6
 -1 4 -2 151.98 10.4
 1 -4 2 150.68 10.5
 -2 4 -2 758.52 50.29
 2 -4 2 751.52 49.99
 -3 4 -2 51.09 4.3
 3 -4 2 48.1 3.8
 -4 4 -2 234.78 16.1
 4 -4 2 222.08 15.7
 -5 4 -2 310.87 21.8
 5 -4 2 311.67 21.4
 -6 4 -2 184.28 14.4
 -6 4 -2 185.28 14
 6 -4 2 192.68 13.6
 -7 4 -2 16.9 2.8
 7 -4 2 12.9 2.7
 -8 4 -2 -0.2 1.2
 -8 4 -2 -0.7 2.1
 8 -4 2 -1.1 1.7
 -9 4 -2 6.5 3
 -9 4 -2 6.8 2
 9 -4 2 6.5 2.7
 -10 4 -2 167.88 13.9
 -10 4 -2 180.18 13.2
 -11 4 -2 15.9 3.3
 -11 4 -2 13.9 2.9
 10 3 -2 48 5.6
 -10 -3 2 62.39 5.7
 -9 -3 2 12.7 3.4
 -8 -3 2 40 5.2
 7 3 -2 209.58 17
 7 3 -2 222.78 17.2
 -7 -3 2 235.28 16.4
 -7 -3 2 222.78 17.6
 6 3 -2 7.8 2.5
 6 3 -2 6.5 2.5
 -6 -3 2 6.4 3.1
 -6 -3 2 8.4 2.3
 5 3 -2 26.5 3.7
 5 3 -2 25.1 3.6
 -5 -3 2 29.5 4.4
 4 3 -2 164.58 12.3
 -4 -3 2 169.08 12.8
 3 3 -2 2720.33 180.18
 -3 -3 2 2738.13 180.48
 2 3 -2 6.1 1.4
 2 3 -2 12.3 1.7
 -2 -3 2 9.3 1.8
 1 3 -2 58.29 4.4
 1 3 -2 55.99 4.4
 -1 -3 2 59.99 4.6
 0 3 -2 651.33 43.5
 0 3 -2 670.93 43.8
 0 -3 2 643.54 43.5
 -2 3 -2 19.8 2.4
 -3 3 -2 575.34 37.3
 3 -3 2 536.95 36.9
 -4 3 -2 762.92 50.79
 4 -3 2 753.12 50.49
 -5 3 -2 95.39 8.1
 -5 3 -2 101.19 8
 5 -3 2 101.79 7.6
 -6 3 -2 133.99 10.1
 6 -3 2 117.09 9.5
 -7 3 -2 0.2 1.5
 7 -3 2 2.2 1.7
 -8 3 -2 34.4 3.8
 -8 3 -2 33.3 4.8
 8 -3 2 35 4.8
 -9 3 -2 27 4.4
 -9 3 -2 30.3 3.7
 9 -3 2 22.2 4.1
 -10 3 -2 2.2 2.4
 -10 3 -2 4.4 2.4
 -11 3 -2 101.89 8
 -11 3 -2 89.99 8.3
 -11 -2 2 35.9 3.9
 -10 -2 2 2 2.4
 -9 -2 2 24.4 4
 8 2 -2 135.59 12.3
 8 2 -2 139.19 12.2
 -8 -2 2 161.88 11.6
 7 2 -2 2.7 2.3
 -7 -2 2 5.4 3.4
 -7 -2 2 3.5 2
 6 2 -2 241.18 17.8
 -6 -2 2 246.28 18.6
 5 2 -2 157.08 11.8
 -5 -2 2 155.98 12.3
 4 2 -2 1379.26 92.69
 -4 -2 2 1408.66 92.99
 3 2 -2 3383.46 220.18
 -3 -2 2 3294.57 220.38
 2 2 -2 347.27 23.4
 -2 -2 2 344.47 23.5
 -1 -2 2 37.1 3.2
 0 2 -2 5.2 1.1
 0 2 -2 5.2 0.7
 -1 2 -2 2338.87 143.99
 1 -2 2 2029.9 143.89
 -2 2 -2 296.17 20
 -3 2 -2 18.7 2.5
 3 -2 2 16.6 2
 -4 2 -2 749.82 51.39
 4 -2 2 784.42 51.09
 -5 2 -2 115.49 8.7
 -5 2 -2 115.19 8.9
 5 -2 2 117.79 8.8
 -6 2 -2 406.46 28.9
 6 -2 2 433.26 29
 -7 2 -2 5.6 1.6
 7 -2 2 5.2 2
 -8 2 -2 11.8 3
 -8 2 -2 8.3 2.1
 8 -2 2 11.1 2.9
 -9 2 -2 113.29 8.7
 -9 2 -2 96.09 9.1
 9 -2 2 106.59 9.5
 -10 2 -2 60.09 6.2
 -11 2 -2 110.89 9
 -12 2 -2 19 2.7
 -11 -1 2 0.8 2
 -10 -1 2 3.7 2.6
 -9 -1 2 42.8 5.1
 8 1 -2 25.1 4.6
 -8 -1 2 34 4.1
 7 1 -2 8.1 2.6
 -7 -1 2 5.9 4.2
 -7 -1 2 6.8 2
 6 1 -2 357.46 24.9
 -6 -1 2 346.37 25.4
 5 1 -2 924.11 60.89
 -5 -1 2 888.11 61.19
 4 1 -2 502.15 34.8
 -4 -1 2 524.15 34.9
 3 1 -2 18.7 2.3
 -3 -1 2 15.9 2.2
 2 1 -2 4417.66 289.77
 -2 -1 2 4382.86 289.77
 -1 -1 2 84.29 6.3
 0 1 -2 498.95 33.7
 0 -1 2 507.35 33.5
 -1 1 -2 2951.5 194.48
 -2 1 -2 3712.13 242.98
 2 -1 2 3662.33 242.68
 -3 1 -2 2015.2 134.59
 3 -1 2 2061.89 134.49
 -4 1 -2 11 2.1
 -4 1 -2 11.1 1.8
 -4 1 -2 8.3 1.7
 4 -1 2 12.3 1.9
 -5 1 -2 108.69 8.4
 5 -1 2 110.09 8.4
 6 -1 2 89.59 7.6
 -7 1 -2 5.3 1.7
 7 -1 2 5.4 2.2
 -8 1 -2 40.2 4.4
 -8 1 -2 29.6 4.5
 8 -1 2 43 5.2
 -9 1 -2 186.18 13.9
 9 -1 2 178.98 14.7
 -10 1 -2 869.11 58.79
 -11 1 -2 28.9 3.8
 -11 0 2 38.1 4.6
 -10 0 2 51.99 5.8
 9 0 -2 8.1 3.2
 -9 0 2 17.2 3
 8 0 -2 0.8 2.1
 -8 0 2 1 1.6
 7 0 -2 26.7 4.1
 -7 0 2 26 3.3
 6 0 -2 7.7 2.2
 -6 0 2 6.3 2.5
 5 0 -2 7.9 1.9
 -5 0 2 9.2 2.2
 4 0 -2 511.55 36.1
 -4 0 2 527.05 36.2
 -4 0 2 567.84 36.7
 3 0 -2 685.63 46.2
 -3 0 2 698.13 46.2
 2 0 -2 4358.46 286.77
 0 0 -2 76.29 5.2
 -1 0 -2 6612.64 435.06
 -2 0 -2 348.67 23.5
 2 0 2 354.96 23.6
 -3 0 -2 149.49 10.5
 -3 0 -2 136.69 10.7
 3 0 2 162.38 10.6
 -4 0 -2 313.87 21.7
 -4 0 -2 302.57 21.9
 4 0 2 331.57 21.8
 -5 0 -2 819.02 55.99
 -5 0 -2 803.12 56.09
 5 0 2 878.81 56.09
 6 0 2 18.1 3.1
 -7 0 -2 90.99 7.5
 7 0 2 95.79 8.4
 -8 0 -2 83.09 7.6
 8 0 2 89.49 8.4
 -9 0 -2 12.4 3
 -10 0 -2 23.3 3.6
 -11 0 -2 88.79 7.5
 -12 1 2 27.3 3.3
 -11 1 2 7.5 2.5
 -10 1 2 53.79 5.7
 9 -1 -2 30.6 4.9
 -9 1 2 36.9 4.4
 8 -1 -2 154.18 12
 -8 1 2 134.69 10.8
 7 -1 -2 484.65 32.5
 -7 1 2 444.06 31.6
 6 -1 -2 78.59 6.9
 -6 1 2 80.59 7.3
 5 -1 -2 1869.41 123.49
 -5 1 2 1853.41 123.59
 4 -1 -2 197.28 14.2
 -4 1 2 207.48 14.3
 3 -1 -2 566.14 38.3
 -3 1 2 577.94 38.3
 2 -1 -2 141.99 9.9
 -2 1 2 142.09 9.9
 1 -1 -2 755.22 50.89
 -1 1 2 787.72 50.89
 0 -1 -2 459.15 30.6
 -1 -1 -2 95.69 6.8
 1 1 2 95.99 6.8
 1 1 2 100.09 6.9
 -2 -1 -2 323.07 22.7
 -2 -1 -2 334.57 22.6
 2 1 2 346.77 22.6
 -3 -1 -2 220.78 14.9
 -3 -1 -2 207.68 15.1
 3 1 2 210.28 14.8
 -4 -1 -2 2641.24 170.88
 -4 -1 -2 2506.75 170.58
 4 1 2 2597.74 170.68
 -5 -1 -2 122.89 9.8
 5 1 2 122.29 9.6
 6 1 2 3.3 2
 -7 -1 -2 265.07 19.1
 7 1 2 262.57 19.8
 7 1 2 272.57 19.9
 -8 -1 -2 279.87 19.1
 8 1 2 242.08 19.7
 8 1 2 263.37 19.9
 -9 -1 -2 31.3 4.6
 -10 -1 -2 61.39 6.3
 -11 -1 -2 5.2 2.1
 -12 2 2 0.7 1.8
 -11 2 2 5.6 2.5
 -10 2 2 7.6 2.4
 9 -2 -2 414.46 30.2
 -9 2 2 427.46 29.1
 8 -2 -2 226.48 17.2
 -8 2 2 223.68 16.1
 -8 2 2 226.98 17
 7 -2 -2 314.37 21.1
 -7 2 2 283.17 22.8
 -7 2 2 273.87 20.8
 -7 2 2 290.37 20.1
 6 -2 -2 380.76 26.5
 5 -2 -2 493.65 33.8
 -5 2 2 497.75 33.8
 4 -2 -2 39.9 3.8
 -4 2 2 37.8 3.7
 3 -2 -2 371.76 26.2
 -3 2 2 399.36 26.1
 2 -2 -2 833.92 54.79
 -2 2 2 825.22 54.59
 -2 2 2 816.22 54.79
 1 -2 -2 139.69 9.4
 1 -2 -2 129.89 9.2
 0 -2 -2 2.7 1.1
 0 2 2 2.6 1.1
 -1 -2 -2 2301.87 153.08
 -1 -2 -2 2224.18 153.18
 1 2 2 2438.16 153.08
 -2 -2 -2 760.82 50.49
 -2 -2 -2 750.12 50.29
 2 2 2 768.22 50.29
 2 2 2 738.83 50.29
 -3 -2 -2 385.06 27.5
 -3 -2 -2 418.96 27.8
 3 2 2 415.66 27.5
 3 2 2 399.16 27.5
 -4 -2 -2 617.64 41.7
 4 2 2 607.64 41.5
 4 2 2 611.64 41.5
 -5 -2 -2 2.2 2
 5 2 2 4.6 2.1
 5 2 2 3.5 1.8
 -6 -2 -2 566.04 39.9
 6 2 2 599.14 40.6
 6 2 2 594.54 40.6
 -7 -2 -2 99.59 9
 7 2 2 111.59 10.1
 7 2 2 114.79 10
 -8 -2 -2 12.6 3.3
 8 2 2 15 4
 -9 -2 -2 134.59 10.9
 -10 -2 -2 -2.9 1.9
 -11 -2 -2 18.2 2.8
 -12 3 2 1.4 2
 -11 3 2 52.59 5.4
 -10 3 2 193.38 15.8
 -10 3 2 222.88 15.3
 9 -3 -2 134.59 11.9
 -9 3 2 154.68 12.1
 -9 3 2 140.79 10.9
 8 -3 -2 231.08 17.4
 -8 3 2 230.78 16.4
 -8 3 2 223.38 20.5
 -8 3 2 234.98 17.5
 7 -3 -2 10.6 2.7
 -7 3 2 13.9 2.8
 -7 3 2 16.7 4.3
 -7 3 2 7.4 1.8
 6 -3 -2 249.28 17.8
 -6 3 2 246.68 17.7
 5 -3 -2 77.29 6.2
 -5 3 2 67.19 6
 -5 3 2 76.49 6.2
 4 -3 -2 11.1 2
 -4 3 2 11 1.9
 -4 3 2 13.1 2
 3 -3 -2 606.84 40.9
 -3 3 2 604.94 40.9
 -3 3 2 620.34 40.8
 2 -3 -2 3609.54 238.68
 -2 3 2 3637.04 238.58
 1 -3 -2 2406.66 159.08
 -1 3 2 2419.86 159.18
 0 -3 -2 7.6 1.6
 0 3 2 4 1.4
 -1 -3 -2 18.4 2.4
 1 3 2 16.7 2.3
 -2 -3 -2 84.49 6.4
 2 3 2 69.49 6.1
 -3 -3 -2 1932.81 127.99
 3 3 2 1924.31 127.89
 -4 -3 -2 27.5 3.9
 4 3 2 32.7 3.9
 -5 -3 -2 2 2.2
 5 3 2 1.1 2
 -6 -3 -2 162.88 12.8
 6 3 2 174.68 13.7
 -7 -3 -2 57.59 6.3
 7 3 2 52.69 7
 -8 -3 -2 32.4 4.6
 -9 -3 -2 174.78 13.4
 -10 -3 -2 216.28 15.6
 -12 4 2 50.29 5
 -11 4 2 2.2 1.9
 -11 4 2 -0.5 2
 -10 4 2 280.87 19.8
 -10 4 2 277.87 20.9
 9 -4 -2 323.67 23.8
 -9 4 2 326.77 24
 -9 4 2 323.17 22.7
 8 -4 -2 44.8 5.5
 -8 4 2 40 7.5
 -8 4 2 59.29 4.8
 7 -4 -2 1328.37 86.39
 -7 4 2 1334.17 85.59
 -7 4 2 1248.58 86.19
 -7 4 2 1239.78 88.39
 6 -4 -2 1140.99 76.29
 -6 4 2 1135.29 76.19
 5 -4 -2 301.37 21.5
 -5 4 2 314.87 21.4
 4 -4 -2 2277.77 151.88
 -4 4 2 2350.56 151.78
 -4 4 2 2262.67 151.78
 3 -4 -2 41.8 3.8
 -3 4 2 41 3.7
 2 -4 -2 33.5 3.2
 -2 4 2 30.5 3.1
 1 -4 -2 875.51 55.09
 -1 4 2 776.02 54.99
 0 -4 -2 682.73 47.5
 0 4 2 732.13 47.4
 -1 -4 -2 269.17 19.1
 1 4 2 279.67 19.1
 -2 -4 -2 43.6 4.6
 2 4 2 44.4 4.5
 -3 -4 -2 2.6 1.9
 3 4 2 3.3 1.8
 -4 -4 -2 1044.1 69.79
 4 4 2 1023.1 69.59
 -5 -4 -2 82.09 8
 -5 -4 -2 101.29 8.7
 5 4 2 92.49 8.5
 -6 -4 -2 69.89 7.1
 6 4 2 71.89 7.7
 -7 -4 -2 28.2 4.1
 7 4 2 26 5.4
 -8 -4 -2 -2.1 2.2
 -9 -4 -2 1.2 2.3
 -10 -4 -2 0.6 1.9
 10 4 2 2.6 2.1
 -12 5 2 29.1 3.3
 -12 5 2 21.7 3.5
 -11 5 2 538.35 34.5
 -11 5 2 471.25 35.3
 -10 5 2 119.89 11
 -10 5 2 126.89 9.7
 9 -5 -2 187.88 15.1
 -9 5 2 171.58 17.1
 -9 5 2 207.08 14.2
 -9 5 2 211.98 15.8
 8 -5 -2 6.9 2.5
 -8 5 2 6.6 3.9
 -8 5 2 7.9 3.3
 -8 5 2 7.8 1.9
 7 -5 -2 544.05 35.8
 -7 5 2 483.85 37.8
 -7 5 2 483.25 35.5
 -7 5 2 552.94 35
 6 -5 -2 61.89 5.6
 -6 5 2 52.69 5.2
 -6 5 2 52.89 7.1
 5 -5 -2 143.59 10.6
 -5 5 2 134.09 10.3
 4 -5 -2 1938.81 128.49
 3 -5 -2 584.34 39.4
 2 -5 -2 1147.69 70.79
 -2 5 2 977.8 70.49
 1 -5 -2 5.5 1.8
 -1 5 2 10.1 1.8
 0 -5 -2 741.93 48.5
 0 5 2 698.53 48.2
 -1 -5 -2 167.78 12.5
 1 5 2 170.18 12.3
 -2 -5 -2 417.56 27.9
 2 5 2 385.46 27.7
 -3 -5 -2 38.7 4.7
 3 5 2 35.3 4.6
 -4 -5 -2 435.36 30.6
 4 5 2 429.96 30.6
 -5 -5 -2 154.18 12.5
 -5 -5 -2 144.29 11.5
 5 5 2 141.19 12.4
 -6 -5 -2 69.19 6.8
 6 5 2 49.99 7.1
 -7 -5 -2 258.47 19.1
 -8 -5 -2 41.1 5.3
 -9 -5 -2 21.1 3.4
 9 5 2 19.4 3.7
 -12 6 2 79.09 7.2
 -12 6 2 79.29 6.4
 -11 6 2 92.49 7.2
 -11 6 2 80.79 8.4
 -10 6 2 39.6 6
 -10 6 2 42 4.4
 9 -6 -2 3.9 2.4
 -9 6 2 4.3 3
 -9 6 2 5.8 1.8
 -9 6 2 2.5 3.9
 8 -6 -2 79.09 7.5
 -8 6 2 76.69 6.5
 -8 6 2 82.69 8.7
 -8 6 2 73.29 9.6
 7 -6 -2 2.1 2
 -7 6 2 5.8 3.5
 -7 6 2 3.4 1.3
 6 -6 -2 7 2.1
 -6 6 2 5.6 1.9
 -6 6 2 5 3.1
 5 -6 -2 11.6 2.4
 -5 6 2 18.5 7
 4 -6 -2 797.52 53.69
 3 -6 -2 46.8 4.6
 2 -6 -2 886.71 59.49
 1 -6 -2 1287.87 85.09
 -1 6 2 1260.77 84.99
 0 -6 -2 11.3 2.5
 0 6 2 9.1 2
 -1 -6 -2 114.89 9.1
 1 6 2 106.99 8.6
 -2 -6 -2 107.99 8.9
 2 6 2 101.79 8.5
 -3 -6 -2 249.48 18.5
 3 6 2 246.68 18.3
 -4 -6 -2 6.4 3.6
 -4 -6 -2 6.5 2.9
 4 6 2 4.9 2.7
 -5 -6 -2 10.4 2.9
 -5 -6 -2 2.8 3.2
 -6 -6 -2 20.4 4.2
 -7 -6 -2 0.4 2.4
 7 6 2 -3.4 2.7
 -8 -6 -2 52.79 5.6
 8 6 2 47 5.9
 -9 -6 -2 6.1 2.1
 9 6 2 5.3 2.5
 -12 7 2 48.6 5.4
 -11 7 2 13.1 2.3
 -11 7 2 10.8 3.5
 -10 7 2 16.3 4.2
 -10 7 2 14.1 2.5
 9 -7 -2 301.77 22.7
 -9 7 2 334.57 24
 -9 7 2 316.27 21.6
 -9 7 2 287.47 25.4
 8 -7 -2 44.5 5.6
 -8 7 2 36.1 6.2
 -8 7 2 40.8 4.1
 -8 7 2 35.5 7.2
 7 -7 -2 -0.5 1.8
 -7 7 2 2.1 3.3
 -7 7 2 2.1 1.4
 6 -7 -2 3.4 1.9
 -6 7 2 2.1 3.1
 5 -7 -2 90.59 7.9
 -5 7 2 99.79 10.6
 4 -7 -2 122.19 8.5
 -4 7 2 83.59 10.1
 3 -7 -2 421.26 29.1
 2 -7 -2 665.23 45.2
 1 -7 -2 44.3 4.8
 0 -7 -2 473.55 32.8
 -1 -7 -2 69.09 6.8
 -2 -7 -2 96.59 8.8
 2 7 2 97.59 8.4
 -3 -7 -2 13.1 3.6
 3 7 2 23.5 2.9
 3 7 2 15 3.4
 3 7 2 24.4 4.5
 -4 -7 -2 250.07 19.9
 4 7 2 259.77 19.8
 4 7 2 269.47 19.6
 -5 -7 -2 157.58 12.9
 -5 -7 -2 161.28 14.1
 5 7 2 168.58 13.6
 -6 -7 -2 2.5 2.8
 6 7 2 1.5 2.8
 -7 -7 -2 47.7 5.5
 7 7 2 41.8 5.7
 -8 -7 -2 36.4 4.4
 8 7 2 39.2 5.1
 -12 8 2 0.6 2.1
 -11 8 2 335.37 24.8
 -10 8 2 76.69 10.6
 -10 8 2 89.79 9
 -10 8 2 78.49 6.5
 9 -8 -2 311.57 22.3
 -9 8 2 289.37 23
 -9 8 2 285.07 24.9
 -9 8 2 304.87 20.8
 8 -8 -2 87.19 8.7
 -8 8 2 94.79 7.6
 -8 8 2 108.99 10.1
 -8 8 2 90.89 11.5
 -7 8 2 140.79 10
 -7 8 2 119.99 13
 6 -8 -2 212.78 15.2
 -6 8 2 209.08 18.1
 -6 8 2 172.38 16.8
 5 -8 -2 87.29 7.6
 -5 8 2 78.89 10
 4 -8 -2 356.56 23.9
 -4 8 2 314.97 26.6
 3 -8 -2 31.4 4.3
 -3 8 2 40.7 6.9
 2 -8 -2 32 4.2
 -2 8 2 27.3 5.8
 1 -8 -2 359.06 23.7
 -1 8 2 301.87 26.1
 0 -8 -2 815.52 53.19
 0 8 2 742.73 52.69
 -1 -8 -2 1174.68 76.69
 1 8 2 1053.89 76.69
 1 8 2 1148.29 76.29
 1 8 2 1157.28 75.59
 -2 -8 -2 -0.4 2.4
 2 8 2 1.2 2
 2 8 2 0 2.7
 2 8 2 0.5 1.5
 -3 -8 -2 0 2.9
 3 8 2 -0.3 2.9
 3 8 2 1.7 2.5
 3 8 2 1.4 1.7
 -4 -8 -2 21 4.7
 4 8 2 25.9 4.6
 4 8 2 25 5
 5 8 2 29.3 4.9
 -6 -8 -2 23.6 5.6
 6 8 2 29.2 4.8
 -7 -8 -2 3.8 2.4
 7 8 2 4.3 2.5
 -12 9 2 106.09 9
 -11 9 2 67.19 7.3
 -10 9 2 57.09 7.2
 -9 9 2 12.5 4.1
 -9 9 2 15.7 5.9
 -9 9 2 12.9 2.2
 8 -9 -2 5.9 2.8
 -8 9 2 3.6 1.7
 -8 9 2 3.1 3.1
 -8 9 2 3.1 4.2
 7 -9 -2 123.29 10.8
 -7 9 2 133.79 13.1
 -7 9 2 119.49 13.9
 -7 9 2 124.59 9.6
 6 -9 -2 1.8 2.1
 -6 9 2 0.3 3.6
 -6 9 2 7.4 4
 5 -9 -2 773.62 50.19
 -5 9 2 695.63 49.5
 -5 9 2 721.33 53.79
 -5 9 2 679.93 51.19
 -5 9 2 779.52 52.19
 4 -9 -2 137.69 10.8
 -4 9 2 120.19 10.4
 -4 9 2 105.09 11.9
 -4 9 2 157.68 14.5
 3 -9 -2 205.88 14.5
 -3 9 2 167.08 16.9
 2 -9 -2 33.2 4.6
 -2 9 2 28.3 3.8
 -2 9 2 30.1 4.5
 -2 9 2 26.9 5.8
 -2 9 2 42 7.3
 1 -9 -2 39.8 5.2
 -1 9 2 45.1 6.6
 -1 9 2 37.9 5.1
 -1 9 2 38.7 4.4
 0 -9 -2 106.69 8.9
 0 9 2 89.59 7.5
 0 9 2 81.39 9.4
 0 9 2 96.09 8.5
 -1 -9 -2 3 2.7
 1 9 2 3.7 2.4
 1 9 2 3.5 1.7
 1 9 2 6.8 3.3
 -2 -9 -2 220.28 18.6
 2 9 2 253.47 17.4
 2 9 2 257.57 19.2
 2 9 2 235.08 18.2
 -3 -9 -2 20.7 4.6
 3 9 2 17.7 4.5
 3 9 2 21.2 3.2
 3 9 2 20.5 4.2
 4 9 2 16.3 4
 4 9 2 23.9 5.2
 5 9 2 5.3 3
 6 9 2 2.1 2.5
 7 9 2 77.49 8
 -12 10 2 4.8 2.1
 -11 10 2 228.98 17.4
 -10 10 2 -0.3 3.7
 -10 10 2 -1.1 2.4
 -9 10 2 213.68 20.6
 -9 10 2 237.58 17.9
 8 -10 -2 94.39 10.1
 -8 10 2 102.19 7.6
 -8 10 2 70.59 11.8
 -8 10 2 119.89 10.2
 -8 10 2 112.69 11.5
 7 -10 -2 159.78 13.3
 -7 10 2 161.18 11.7
 -7 10 2 169.48 15.4
 -7 10 2 149.19 16.8
 6 -10 -2 28.8 4.8
 -6 10 2 35.5 8.4
 -6 10 2 49.3 7.9
 5 -10 -2 322.67 23.9
 -5 10 2 281.87 25.3
 -5 10 2 345.57 23.4
 -5 10 2 322.37 27.8
 -5 10 2 364.46 26.3
 4 -10 -2 901.61 63.19
 -4 10 2 882.51 66.79
 -4 10 2 984.5 65.39
 -4 10 2 904.31 64.59
 -4 10 2 967.3 62.59
 3 -10 -2 50.59 5.6
 -3 10 2 35.2 4.5
 -3 10 2 28.7 6.2
 -3 10 2 37.3 6.5
 2 -10 -2 2.5 2.5
 -2 10 2 0.6 3.2
 -2 10 2 2.6 3.3
 -2 10 2 0.2 1.7
 -2 10 2 3.8 2.6
 1 -10 -2 3.3 2.6
 -1 10 2 5.7 3.7
 -1 10 2 6.6 4
 -1 10 2 5 1.9
 -1 10 2 2.5 2.3
 0 -10 -2 5.5 3.1
 0 10 2 8.2 2.8
 0 10 2 12.1 4.3
 0 10 2 10 2.5
 -1 -10 -2 42.2 5.9
 1 10 2 45.8 5.8
 1 10 2 29.3 4.2
 1 10 2 25.1 5.8
 -2 -10 -2 23.6 4.7
 2 10 2 23.8 4.5
 2 10 2 17.8 4.9
 2 10 2 15.8 3.1
 3 10 2 15.4 4.9
 3 10 2 6.8 3.2
 4 10 2 8.5 4.3
 4 10 2 13.6 3.7
 5 10 2 -0.2 2.4
 6 10 2 2.6 2.4
 -11 11 2 -0.4 2
 -10 11 2 17.7 3.7
 -10 11 2 13.9 5
 -9 11 2 1.1 4
 -9 11 2 7.9 3
 -8 11 2 0.4 4.1
 -8 11 2 -0.9 3.4
 -8 11 2 1.4 2.4
 7 -11 -2 -0.6 2.7
 -7 11 2 1.2 2.7
 -7 11 2 -1.3 4.3
 -7 11 2 1.7 3.3
 -7 11 2 -0.4 1.6
 6 -11 -2 35.1 5.5
 -6 11 2 53.89 5.7
 -6 11 2 56.89 8.3
 -6 11 2 36.4 8.7
 5 -11 -2 224.68 17.6
 -5 11 2 235.88 21.6
 -5 11 2 234.28 19.8
 -5 11 2 217.18 19.6
 -5 11 2 225.08 16.9
 4 -11 -2 1.3 2.5
 -4 11 2 1.8 3.8
 -4 11 2 4.3 4.2
 -4 11 2 4.9 2.1
 3 -11 -2 115.99 11.8
 -3 11 2 149.88 11.3
 -3 11 2 150.88 13.7
 -3 11 2 162.78 14.5
 2 -11 -2 -1 2.5
 -2 11 2 -0.6 3.6
 -2 11 2 1.2 1.9
 -2 11 2 0.3 2.7
 -2 11 2 -1.9 3.3
 1 -11 -2 17.9 4
 -1 11 2 30.8 8.9
 -1 11 2 23.8 3.6
 -1 11 2 22.9 5.3
 -1 11 2 16.4 3.9
 0 -11 -2 3.1 2.7
 0 11 2 2.5 2
 0 11 2 0.2 2.5
 0 11 2 6 4.2
 1 11 2 63.69 7.4
 1 11 2 66.79 6.4
 1 11 2 76.69 9.4
 2 11 2 199.88 16.4
 2 11 2 172.78 13.7
 2 11 2 184.68 14.9
 3 11 2 60.39 8.5
 3 11 2 78.89 7.7
 4 11 2 7.6 2.9
 4 11 2 14.7 4.4
 5 11 2 5 2.5
 -11 12 2 0.7 1.7
 -10 12 2 122.79 12.5
 -10 12 2 118.99 9.9
 -9 12 2 6.5 4.3
 -9 12 2 -0.6 3.3
 -9 12 2 2.1 2.3
 -8 12 2 8.5 2.9
 -8 12 2 7.9 4.4
 -8 12 2 10.8 5.1
 -7 12 2 27 6
 -7 12 2 34 8
 -6 12 2 38.1 4.9
 -6 12 2 29.4 6.6
 5 -12 -2 89.79 10
 -5 12 2 129.09 12.6
 -5 12 2 131.59 12.9
 -5 12 2 92.19 14.1
 -5 12 2 110.69 9.3
 4 -12 -2 152.48 12.8
 -4 12 2 154.08 14.7
 -4 12 2 143.29 14.7
 -4 12 2 155.68 11.9
 3 -12 -2 60.89 7.4
 -3 12 2 69.49 9.4
 -3 12 2 61.79 8.9
 -3 12 2 66.59 6.4
 2 -12 -2 20.6 4.6
 -2 12 2 32.5 6.5
 -2 12 2 27.5 4.8
 -2 12 2 27.7 6.1
 -2 12 2 33.7 4.3
 -1 12 2 92.29 8.2
 -1 12 2 91.29 8.9
 -1 12 2 89.89 10.9
 0 12 2 40.6 5.6
 0 12 2 40.8 7.2
 0 12 2 34.5 4.6
 1 12 2 7.4 3.2
 1 12 2 9.8 4.7
 1 12 2 5.3 2.4
 2 12 2 13.4 2.9
 2 12 2 19.3 5.3
 2 12 2 19.5 4
 3 12 2 1.2 2.5
 3 12 2 1.4 3.4
 4 12 2 37.8 4.6
 -10 13 2 35.3 4.1
 -10 13 2 28.6 3.7
 -9 13 2 2.1 4.3
 -9 13 2 3.3 3.4
 -8 13 2 2.6 3.3
 -8 13 2 2.4 4.3
 -7 13 2 40.2 9.2
 -7 13 2 42.2 7.5
 -6 13 2 40.2 4.9
 -6 13 2 36.9 7.1
 -5 13 2 164.98 15.5
 -5 13 2 155.68 12.6
 -5 13 2 166.78 15.4
 -4 13 2 19.3 3.4
 -4 13 2 18.8 5.9
 -4 13 2 19.6 5.4
 -3 13 2 18.1 5.8
 -3 13 2 21.3 5.6
 -3 13 2 14.1 3.2
 -2 13 2 20.5 5.6
 -2 13 2 15.9 3.1
 -2 13 2 15 5.5
 -1 13 2 13.1 2.9
 -1 13 2 11.2 5.4
 -1 13 2 16.5 3.9
 0 13 2 7.4 2.3
 0 13 2 4.5 3
 0 13 2 8.1 4.9
 1 13 2 1.5 1.9
 1 13 2 2.4 4.1
 1 13 2 1.7 2.7
 2 13 2 0.3 2.3
 2 13 2 5.8 3.6
 3 13 2 0.7 3.3
 -9 14 2 3.7 3.1
 -9 14 2 6.6 2.2
 -8 14 2 48.3 7
 -7 14 2 12.9 4.5
 -6 14 2 9.1 2.7
 -6 14 2 8.6 4.4
 -5 14 2 28.1 6.4
 -5 14 2 31.5 4.1
 -4 14 2 228.18 19.8
 -4 14 2 231.88 17.3
 -4 14 2 249.38 19.8
 -3 14 2 115.49 12
 -3 14 2 104.59 8.8
 -3 14 2 98.69 11.1
 -2 14 2 72.29 7.1
 -2 14 2 92.99 10.3
 -1 14 2 44.4 7.2
 -1 14 2 42 4.8
 0 14 2 3.4 3.9
 0 14 2 6.3 3.1
 0 14 2 3.3 2
 1 14 2 11.7 4.2
 1 14 2 11 2.3
 -8 15 2 9.3 3.4
 -7 15 2 0.6 3.1
 -6 15 2 8.5 4
 -6 15 2 13.6 2.6
 -5 15 2 31.1 6
 -5 15 2 26.5 3.6
 -4 15 2 1.8 3.7
 -4 15 2 3.1 2
 -4 15 2 2.6 4.2
 -3 15 2 7.7 2.3
 -3 15 2 5 3.7
 -3 15 2 10.2 4.3
 -2 15 2 11.2 2.6
 -2 15 2 14.7 4.6
 -1 15 2 0.5 1.7
 -1 15 2 -1 3.1
 0 15 2 21.5 3.6
 0 15 2 20.5 4.2
 -6 16 2 3.6 3
 -5 16 2 2.2 1.6
 -5 16 2 1.4 2.8
 -4 16 2 16.6 5.9
 -4 16 2 12.9 2.3
 -3 16 2 2.8 1.7
 -2 16 -3 -4.9 4.6
 -2 16 -3 0.3 1.5
 -3 16 -3 8.2 2.1
 -3 16 -3 11 4.3
 -4 16 -3 29.5 5.2
 -4 16 -3 25.9 3.3
 -5 16 -3 42 4.2
 -5 16 -3 40.7 6.1
 -6 16 -3 1.9 1.6
 -6 16 -3 3.5 3
 -7 16 -3 13.9 3.2
 -7 16 -3 13.8 3.7
 0 15 -3 2 2.8
 0 15 -3 -0.2 2.4
 -1 15 -3 1.3 3.1
 -1 15 -3 0.7 1.8
 -1 15 -3 2.5 2.8
 -2 15 -3 17.5 3.1
 -2 15 -3 24.9 4.4
 -2 15 -3 18.1 5
 -3 15 -3 3.2 3.9
 -3 15 -3 -0.8 4
 -3 15 -3 0.7 2.9
 -3 15 -3 0.3 1.9
 -4 15 -3 20.6 4.2
 -4 15 -3 17.6 3.2
 -4 15 -3 14.7 5.1
 -5 15 -3 18.8 3.2
 -5 15 -3 20.1 5.3
 -6 15 -3 17.9 5
 -6 15 -3 19 3
 -7 15 -3 3.3 3.6
 -7 15 -3 2.9 2
 -8 15 -3 57.29 6.9
 -8 15 -3 51.19 4.9
 -8 15 -3 47.7 5
 2 14 -3 15.2 3.3
 2 14 -3 9.8 3.3
 1 14 -3 5.3 3.3
 1 14 -3 3.2 2.6
 0 14 -3 30.6 5.7
 0 14 -3 30.8 4.9
 0 14 -3 30.2 3.8
 -1 14 -3 3.4 3
 -1 14 -3 0.1 2
 -1 14 -3 4.2 4
 -2 14 -3 72.69 10.8
 -2 14 -3 118.19 10.1
 -2 14 -3 94.29 8.4
 -2 14 -3 113.19 10.7
 -3 14 -3 138.99 11.5
 -3 14 -3 153.68 13.1
 -3 14 -3 149.29 13.6
 -3 14 -3 141.39 14.1
 -4 14 -3 9 2.8
 -4 14 -3 16.7 5.4
 -4 14 -3 2.4 3.4
 -5 14 -3 24.7 6.2
 -5 14 -3 30.7 4.5
 -5 14 -3 35.9 5.4
 -6 14 -3 2.2 3.8
 -6 14 -3 3.4 2.3
 -7 14 -3 7.4 2.6
 -7 14 -3 4.4 2.2
 -7 14 -3 -0.1 3.6
 -8 14 -3 0.9 2.2
 -8 14 -3 2.7 3.6
 -8 14 -3 2.6 2.2
 -9 14 -3 38.2 4.2
 -9 14 -3 26.6 5.3
 -10 14 -3 22.3 3.1
 3 13 -3 3.6 2.5
 3 13 -3 4.5 3
 2 13 -3 3.5 2.8
 2 13 -3 1.1 3.3
 1 13 -3 11 4.6
 1 13 -3 17.7 4.1
 0 13 -3 5.1 3.3
 0 13 -3 2.8 2.2
 0 13 -3 -1.2 3.8
 -1 13 -3 36.2 5.7
 -1 13 -3 31.7 6
 -1 13 -3 29.4 4.2
 -2 13 -3 152.48 12.7
 -2 13 -3 168.68 14.6
 -2 13 -3 182.28 14.2
 -2 13 -3 152.08 15.1
 -3 13 -3 184.38 16.6
 -3 13 -3 176.88 15.3
 -3 13 -3 171.78 13.8
 -3 13 -3 182.68 15.6
 -4 13 -3 -0.1 3.6
 -4 13 -3 0.7 2.3
 -4 13 -3 0.7 3.1
 -5 13 -3 13.1 3.2
 -5 13 -3 12.6 5.1
 -5 13 -3 11 4.2
 -6 13 -3 16 5.4
 -6 13 -3 13.2 3.2
 -6 13 -3 10.9 3.4
 -7 13 -3 -0.1 3.6
 -7 13 -3 1.9 2.5
 -7 13 -3 -1.3 2.2
 -8 13 -3 4.2 2.6
 -8 13 -3 1.9 3.9
 -9 13 -3 140.59 10.9
 -9 13 -3 129.79 12.8
 -10 13 -3 0.2 2
 4 12 -3 -1 2.8
 4 12 -3 0.8 2.5
 3 12 -3 -2.1 3.1
 3 12 -3 0 2.5
 2 12 -3 1.2 3.8
 2 12 -3 3.1 3
 1 12 -3 240.38 18.4
 1 12 -3 216.28 17.4
 1 12 -3 208.18 16.1
 0 12 -3 15.6 4.8
 0 12 -3 15 3
 0 12 -3 13 4
 -1 12 -3 60.69 7.8
 -1 12 -3 79.99 9.1
 -1 12 -3 72.09 6.7
 -2 12 -3 122.09 11.8
 -2 12 -3 120.29 10.2
 -2 12 -3 112.39 12.6
 -2 12 -3 140.79 11.9
 2 -12 3 132.09 11
 -3 12 -3 1.9 3
 -3 12 -3 -0.5 2
 -3 12 -3 4 3.5
 -3 12 -3 -0.6 3.4
 -4 12 -3 3.5 4
 -4 12 -3 16.1 3.3
 -5 12 -3 88.29 8.9
 -5 12 -3 64.49 6.8
 -5 12 -3 51.29 9
 -5 12 -3 61.09 6.9
 -6 12 -3 408.86 32.3
 -6 12 -3 435.06 29.8
 -6 12 -3 412.56 29.8
 -7 12 -3 12.2 5
 -7 12 -3 6.9 3.1
 -7 12 -3 5.4 2.7
 -8 12 -3 74.49 10.2
 -8 12 -3 92.39 8.3
 -9 12 -3 38.5 4.9
 -9 12 -3 29.7 4.4
 -10 12 -3 4.8 2.4
 -10 12 -3 5.9 2.4
 -11 12 -3 10.5 2.4
 -11 12 -3 9.8 2.5
 5 11 -3 44 5.7
 5 11 -3 47.7 6
 4 11 -3 8.6 3.7
 4 11 -3 4.5 3.1
 3 11 -3 67.99 8.2
 3 11 -3 87.19 9.5
 2 11 -3 51.19 6.7
 2 11 -3 37.5 6.5
 1 11 -3 -1.3 3.3
 1 11 -3 2.5 2
 1 11 -3 4.9 3.1
 -1 -11 3 2.1 3
 0 11 -3 117.19 11.4
 0 11 -3 124.49 9.8
 0 11 -3 108.29 10.3
 0 11 -3 127.69 11
 0 -11 3 130.39 11
 -1 11 -3 62.89 8.9
 -1 11 -3 69.69 8
 -1 11 -3 63.09 6.3
 -1 11 -3 69.49 7.6
 1 -11 3 68.99 7.1
 -2 11 -3 3.9 2.2
 -2 11 -3 14.8 4.1
 -2 11 -3 4.8 3.4
 -2 11 -3 0.2 3.4
 2 -11 3 22 3.8
 -3 11 -3 12.3 2.9
 -3 11 -3 24.7 4.9
 -3 11 -3 8.6 4
 -3 11 -3 6.2 4
 -4 11 -3 2.4 3.2
 -4 11 -3 2.5 3.2
 -4 11 -3 2.5 3.7
 -4 11 -3 1.6 2.3
 -4 11 -3 2 2.6
 -5 11 -3 15.7 3.8
 -5 11 -3 18.1 3.6
 -5 11 -3 16.2 5.5
 -5 11 -3 16.8 5.3
 -5 11 -3 19.5 4.7
 -6 11 -3 275.07 21
 -6 11 -3 297.87 25.8
 -6 11 -3 282.97 23.7
 -7 11 -3 15.6 5.5
 -7 11 -3 13 5.7
 -7 11 -3 10.4 3.1
 -8 11 -3 47.4 8.3
 -8 11 -3 44.5 5.7
 -9 11 -3 27.2 4.6
 -10 11 -3 -0.6 2.3
 -10 11 -3 2.1 2.3
 -11 11 -3 0.5 2
 -11 11 -3 1 2
 6 10 -3 39.4 4.9
 6 10 -3 22.4 4.3
 5 10 -3 19.5 4.3
 4 10 -3 11.4 3.8
 4 10 -3 13.3 4.2
 3 10 -3 17.7 4.2
 3 10 -3 12.4 4.3
 2 10 -3 70.49 7.7
 2 10 -3 65.89 8.4
 -2 -10 3 60.19 7.7
 1 10 -3 0.4 2.3
 1 10 -3 4.3 1.8
 1 10 -3 7.3 2.8
 1 10 -3 6.3 3.4
 -1 -10 3 -0.9 2.7
 0 10 -3 60.79 7.3
 0 10 -3 59.69 5.6
 0 10 -3 53.99 6.2
 -1 10 -3 27.1 3.7
 -1 10 -3 20.9 5.5
 -1 10 -3 29.6 5
 -1 10 -3 37.7 5.1
 1 -10 3 34.5 4.5
 -2 10 -3 24.3 4.4
 -2 10 -3 45.7 5.7
 2 -10 3 12.3 3.1
 -3 10 -3 126.49 11.1
 -3 10 -3 108.79 11.1
 -3 10 -3 101.89 11
 -3 10 -3 129.59 9.9
 -3 10 -3 122.09 12.2
 3 -10 3 128.19 9.8
 -4 10 -3 42.8 6.8
 -4 10 -3 57.39 7.4
 -4 10 -3 27.6 5
 -4 10 -3 74.79 10.2
 -5 10 -3 38.2 6.6
 -5 10 -3 53.49 6.9
 -5 10 -3 32.1 7.4
 -6 10 -3 103.79 12.4
 -6 10 -3 115.49 11.9
 -7 10 -3 11 4.9
 -7 10 -3 12.2 3.3
 -7 10 -3 13.3 3.1
 -7 10 -3 3.6 4
 -8 10 -3 85.09 8.2
 -8 10 -3 69.89 10.7
 -9 10 -3 141.09 12.1
 -10 10 -3 1.2 2.6
 -11 10 -3 18.4 3.4
 -11 10 -3 11.5 3.2
 -12 10 -3 6 2.3
 7 9 -3 10.1 2.9
 6 9 -3 2.7 3.1
 6 9 -3 1.9 2.6
 5 9 -3 10.7 3.7
 5 9 -3 6 3.2
 4 9 -3 13.9 3.7
 4 9 -3 9.8 4.1
 3 9 -3 32.2 5.5
 3 9 -3 30.9 5
 -3 -9 3 29.7 5.3
 2 9 -3 39.3 4.9
 2 9 -3 23.7 4.4
 2 9 -3 36.9 5.4
 1 9 -3 46 5.3
 1 9 -3 33.2 4.8
 1 9 -3 34.6 5.5
 1 9 -3 43.2 4.4
 -1 -9 3 39.8 5.4
 0 9 -3 11.7 3.5
 0 9 -3 7.7 2.6
 0 9 -3 14.2 2.5
 0 -9 3 6.3 2.6
 -1 9 -3 11.7 3.1
 1 -9 3 7.6 2.5
 -2 9 -3 10.8 3.3
 -2 9 -3 18.1 3.9
 2 -9 3 19.1 3
 -3 9 -3 109.09 10
 -3 9 -3 99.09 11.6
 -3 9 -3 92.59 9.2
 3 -9 3 103.79 8.3
 -4 9 -3 104.79 12
 -4 9 -3 121.09 11.1
 -4 9 -3 105.89 9.9
 -4 9 -3 111.09 10.4
 -5 9 -3 2.4 2.2
 -5 9 -3 1.2 3.7
 -5 9 -3 3.6 2.8
 -5 9 -3 -0.1 2.9
 -5 9 -3 1.1 3.2
 -6 9 -3 506.15 39.1
 -6 9 -3 456.15 38.1
 -6 9 -3 528.85 35.8
 -6 9 -3 486.15 36.1
 -6 9 -3 614.74 39
 -7 9 -3 11.6 5.4
 -7 9 -3 23.3 5.9
 -7 9 -3 15.9 5.2
 -7 9 -3 31.1 4.2
 -7 9 -3 25 4.6
 -8 9 -3 1 2.5
 -9 9 -3 40.4 5.9
 -10 9 -3 71.29 8
 -11 9 -3 11.9 3.1
 -11 9 -3 6 3
 -12 9 -3 36.5 4.6
 7 8 -3 5.4 2.7
 6 8 -3 -0.2 2.5
 6 8 -3 2.1 3.1
 5 8 -3 16.4 4.1
 5 8 -3 21.7 4.5
 4 8 -3 50.49 6.7
 4 8 -3 41 5.9
 -4 -8 3 46.3 6.6
 3 8 -3 11 3.5
 3 8 -3 2.2 2.3
 3 8 -3 10.7 3.1
 -3 -8 3 0.4 2.9
 2 8 -3 4.5 2.8
 2 8 -3 3.2 2.2
 2 8 -3 3.1 2.3
 -2 -8 3 2.3 2.4
 1 8 -3 15.4 3.1
 -1 -8 3 8 2.7
 0 8 -3 323.87 23.8
 0 -8 3 341.77 23.5
 -1 8 -3 1.5 2
 1 -8 3 -0.1 1.5
 -2 8 -3 59.79 7.1
 2 -8 3 77.19 6
 -3 8 -3 33.1 5.1
 -3 8 -3 34.8 6.5
 -3 8 -3 31.6 6.8
 3 -8 3 25.4 3.3
 -4 8 -3 38.7 7
 -4 8 -3 41.6 7.3
 4 -8 3 44.3 4.7
 -5 8 -3 22.3 5.8
 -5 8 -3 29.6 5.6
 -5 8 -3 30.8 4.7
 -5 8 -3 31.6 6.7
 -6 8 -3 72.79 9.3
 -6 8 -3 68.19 8.6
 -7 8 -3 21.1 5.4
 -7 8 -3 18.4 5.6
 -8 8 -3 93.79 9.4
 -8 8 -3 97.99 11.2
 -9 8 -3 345.37 25.9
 -10 8 -3 3.6 3
 -11 8 -3 35.8 5.2
 -11 8 -3 41.1 5.7
 -12 8 -3 37.9 4.9
 8 7 -3 18.9 3.6
 7 7 -3 0.5 2.5
 6 7 -3 3.4 2.7
 6 7 -3 2.5 3
 5 7 -3 53.19 6.6
 5 7 -3 66.49 7.4
 -5 -7 3 50.09 7.1
 4 7 -3 62.29 6.7
 4 7 -3 59.59 7.3
 4 7 -3 64.19 6.8
 -4 -7 3 56.59 7.2
 3 7 -3 1.7 2
 3 7 -3 2.5 2.7
 3 7 -3 0.2 2.1
 -3 -7 3 1 2.4
 2 7 -3 166.38 12.8
 -2 -7 3 165.18 13
 -1 -7 3 623.84 42.6
 0 7 -3 150.88 11.5
 0 -7 3 141.29 10.9
 -1 7 -3 96.09 8.3
 1 -7 3 87.49 7.2
 2 -7 3 926.61 61.79
 3 -7 3 1.2 1.2
 4 -7 3 30.5 3.2
 -5 7 -3 580.24 41.1
 -5 7 -3 522.65 41.4
 5 -7 3 621.94 38.9
 -6 7 -3 42.6 6.7
 -6 7 -3 44.1 7.1
 6 -7 3 42.4 4.4
 -7 7 -3 0.1 2.8
 -7 7 -3 4.7 2.8
 7 -7 3 1.7 1.7
 -8 7 -3 2.8 2.8
 8 -7 3 -1.2 1.8
 -9 7 -3 25.9 5.2
 9 -7 3 41.1 5
 -10 7 -3 63.69 7.6
 -11 7 -3 27.2 4.7
 -12 7 -3 0.6 2.1
 -9 -6 3 -0.2 2.2
 8 6 -3 8.6 3
 7 6 -3 9.9 3.4
 6 6 -3 4.4 3.3
 6 6 -3 13 3.5
 -6 -6 3 14.7 4.2
 5 6 -3 37.9 5.5
 5 6 -3 31.7 4.9
 -5 -6 3 37.3 5.9
 4 6 -3 180.68 15
 4 6 -3 202.48 15.6
 4 6 -3 214.18 15.4
 -4 -6 3 211.08 16
 3 6 -3 12.1 2.8
 -3 -6 3 10 3
 -2 -6 3 89.79 7.9
 -1 -6 3 32.4 4
 0 6 -3 2.5 1.7
 0 -6 3 2.9 1.5
 -1 6 -3 107.39 8.9
 -1 6 -3 109.99 7.9
 1 -6 3 104.79 7.9
 -2 6 -3 1149.29 74.59
 2 -6 3 1101.99 74.59
 -3 6 -3 1761.92 115.29
 3 -6 3 1729.43 115.29
 -4 6 -3 1685.33 108.29
 4 -6 3 1575.54 107.69
 -5 6 -3 775.92 52.89
 -5 6 -3 830.92 54.49
 5 -6 3 746.33 52.29
 -6 6 -3 91.09 8.9
 6 -6 3 83.69 7
 -7 6 -3 0.4 2.4
 -7 6 -3 2.2 2.7
 7 -6 3 2.2 1.7
 -8 6 -3 18.7 2.8
 -8 6 -3 25.8 4.7
 -8 6 -3 26.2 3.8
 8 -6 3 23.9 3.8
 -9 6 -3 9 3.4
 9 -6 3 11.3 3
 -10 6 -3 138.79 12.3
 -11 6 -3 1.8 2.5
 -12 6 -3 244.48 18
 9 5 -3 1.5 2.3
 -9 -5 3 1.8 2.2
 8 5 -3 63.09 7.1
 -8 -5 3 68.69 6.9
 7 5 -3 137.39 11.9
 -7 -5 3 153.68 14.3
 6 5 -3 229.28 18.7
 -6 -5 3 267.87 19.4
 5 5 -3 11.9 3.6
 -5 -5 3 28.8 4.9
 -4 -5 3 21.2 4.1
 -3 -5 3 842.82 57.29
 -2 -5 3 47.5 5.1
 1 5 -3 1.2 1.2
 -1 -5 3 0.6 1.5
 0 5 -3 119.89 8.6
 0 5 -3 109.59 9.1
 0 -5 3 131.19 8.9
 -1 5 -3 164.98 10.7
 -1 5 -3 134.09 11.4
 1 -5 3 156.38 10.7
 -2 5 -3 3492.85 225.48
 2 -5 3 3359.86 225.58
 -3 5 -3 184.18 12.2
 3 -5 3 158.18 11.6
 -4 5 -3 9.8 2.1
 4 -5 3 12.3 1.7
 -5 5 -3 197.48 14.8
 -5 5 -3 191.88 13.7
 5 -5 3 170.88 13.1
 -6 5 -3 2 2.1
 -6 5 -3 2.3 1.7
 6 -5 3 2.6 1.5
 -7 5 -3 25.5 4.1
 -7 5 -3 9.7 3.1
 7 -5 3 14 2.6
 -8 5 -3 67.29 6.1
 -8 5 -3 69.89 7.6
 -8 5 -3 82.89 7.1
 8 -5 3 76.19 7
 -9 5 -3 38.3 5.7
 -9 5 -3 34.9 4.1
 9 -5 3 38.2 5.1
 -10 5 -3 42.7 5.9
 -10 5 -3 48 4.9
 -11 5 -3 6.6 2.8
 -12 5 -3 67.79 6.3
 -10 -4 3 16.7 2.9
 9 4 -3 41.6 5.5
 -9 -4 3 50.89 5.5
 8 4 -3 40.3 5.6
 -8 -4 3 41.2 5.1
 -7 -4 3 13.4 4.3
 -7 -4 3 7.6 2.9
 6 4 -3 50.49 6.3
 -6 -4 3 55.69 7
 5 4 -3 122.19 10.4
 -5 -4 3 139.39 11.5
 4 4 -3 233.28 17.4
 4 4 -3 252.37 17.5
 -4 -4 3 244.48 18.1
 3 4 -3 1.3 1.4
 -3 -4 3 0.8 1.9
 2 4 -3 2489.55 165.68
 -2 -4 3 2530.05 165.98
 1 4 -3 87.79 7
 -1 -4 3 98.79 7
 0 4 -3 1 1.2
 0 4 -3 0.5 0.8
 0 -4 3 1.2 0.9
 -1 4 -3 68.59 5.9
 -1 4 -3 73.69 4.9
 1 -4 3 64.89 5
 -2 4 -3 942.71 62.59
 -3 4 -3 32.9 3.2
 3 -4 3 27.7 2.5
 -4 4 -3 15.6 2.4
 -4 4 -3 15.7 2.9
 4 -4 3 14.3 1.9
 -5 4 -3 296.47 21.9
 -5 4 -3 309.27 21.4
 5 -4 3 308.27 20.9
 -6 4 -3 327.57 24.1
 -6 4 -3 345.77 24.6
 6 -4 3 350.56 23.7
 -7 4 -3 313.47 22.9
 7 -4 3 336.97 22.9
 -8 4 -3 473.95 31.9
 -8 4 -3 431.46 30.5
 8 -4 3 440.76 31.4
 -9 4 -3 37.7 5.4
 -9 4 -3 45 4.5
 9 -4 3 36.7 5.2
 -10 4 -3 51.69 6.4
 -10 4 -3 63.89 5.8
 -11 4 -3 4 2.5
 -11 4 -3 3.4 2.2
 -12 4 -3 94.69 9.6
 -10 -3 3 60.09 5.9
 9 3 -3 18 3.8
 -9 -3 3 16.7 3.4
 -8 -3 3 13.8 3.2
 7 3 -3 24.9 4.4
 7 3 -3 29.4 4.8
 -7 -3 3 32.5 5.6
 -7 -3 3 28.5 4
 6 3 -3 5.5 2.2
 6 3 -3 3.6 2.4
 -6 -3 3 3.7 2.1
 -6 -3 3 8 3.2
 5 3 -3 194.78 14.5
 -5 -3 3 199.28 15.3
 4 3 -3 107.59 8.3
 -4 -3 3 104.99 8.8
 3 3 -3 2143.89 140.99
 -3 -3 3 2118.89 141.19
 2 3 -3 79.39 5.8
 -2 -3 3 72.89 6
 1 3 -3 3.4 0.9
 -1 -3 3 5.1 1.2
 0 3 -3 0.7 0.6
 0 3 -3 1.9 1.1
 0 -3 3 0.9 0.8
 -1 3 -3 223.98 15.7
 -2 3 -3 17.3 2.2
 -2 3 -3 19.9 2.7
 -3 3 -3 53.89 4.9
 -3 3 -3 59.29 5.3
 3 -3 3 62.99 4.4
 -4 3 -3 35.2 3.8
 -4 3 -3 36.3 3.7
 4 -3 3 29.3 3
 -5 3 -3 11.6 2.5
 5 -3 3 14.5 2.1
 -6 3 -3 529.15 35.9
 -6 3 -3 509.75 36.4
 6 -3 3 541.45 35.9
 -7 3 -3 21 3.2
 -7 3 -3 13.1 2.2
 7 -3 3 18 3
 -8 3 -3 217.48 16.8
 -8 3 -3 215.78 15.7
 8 -3 3 228.78 16.7
 -9 3 -3 29 4.5
 -9 3 -3 32.7 4.1
 9 -3 3 28.2 4.5
 -10 3 -3 9.5 2.6
 -10 3 -3 6.6 2.8
 -11 3 -3 101.29 8.1
 -11 3 -3 98.39 8.6
 -11 -2 3 -1.8 1.7
 -10 -2 3 8.2 2.8
 -9 -2 3 5.7 2.7
 8 2 -3 18 4.1
 8 2 -3 24.4 4.6
 -8 -2 3 27.6 3.6
 7 2 -3 72.49 7.4
 -7 -2 3 75.49 8.3
 -7 -2 3 75.59 6.6
 6 2 -3 9.3 2.4
 -6 -2 3 11.2 3.4
 5 2 -3 19.4 3
 -5 -2 3 18.3 3.3
 4 2 -3 708.93 48.5
 -4 -2 3 734.23 48.8
 3 2 -3 3349.26 224.68
 -3 -2 3 3466.65 224.88
 2 2 -3 259.17 17.6
 -2 -2 3 258.67 17.8
 -1 -2 3 360.76 24.2
 0 2 -3 768.82 50.69
 0 2 -3 781.62 51.19
 0 -2 3 756.02 50.89
 -1 2 -3 495.45 34.3
 -1 2 -3 528.95 34.1
 -2 2 -3 921.51 60.19
 -2 2 -3 893.81 60.49
 -3 2 -3 2834.72 191.98
 3 -2 3 2980.2 191.48
 -4 2 -3 1376.36 93.19
 4 -2 3 1426.46 92.79
 -5 2 -3 37.8 3.5
 -5 2 -3 30.7 3.8
 5 -2 3 36.3 3.6
 -6 2 -3 2.5 1.5
 6 -2 3 3.1 1.6
 -7 2 -3 31.3 3.4
 7 -2 3 23.3 3.7
 -8 2 -3 252.07 18.7
 -8 2 -3 239.48 17.9
 8 -2 3 265.77 18.9
 -9 2 -3 201.38 14.9
 -9 2 -3 198.68 15.4
 9 -2 3 195.98 15.6
 -10 2 -3 125.59 10.2
 -10 2 -3 122.19 10.4
 -11 2 -3 223.08 16
 -11 -1 3 -0.8 1.8
 -10 -1 3 17 3.5
 -9 -1 3 1.5 2.1
 8 1 -3 611.44 42.8
 -8 -1 3 615.94 41.9
 7 1 -3 3.6 2.2
 -7 -1 3 4 3.2
 -7 -1 3 1.2 1.5
 6 1 -3 9.3 2.4
 -6 -1 3 8.9 2.9
 -6 -1 3 9.5 3.7
 5 1 -3 219.18 16
 -5 -1 3 225.18 16.2
 4 1 -3 1413.86 93.99
 -4 -1 3 1416.16 94.19
 3 1 -3 7237.78 489.25
 -3 -1 3 7635.64 489.45
 2 1 -3 4177.38 276.77
 -2 -1 3 4229.08 276.87
 -1 -1 3 210.88 14.3
 0 1 -3 624.34 39.5
 0 1 -3 588.94 39.5
 0 -1 3 569.74 39.5
 -1 1 -3 534.25 35.7
 -2 1 -3 8.8 1.5
 2 -1 3 7.6 1.1
 -3 1 -3 258.27 17.9
 -3 1 -3 251.57 17.6
 3 -1 3 264.37 17.7
 -4 1 -3 315.67 21.5
 -4 1 -3 309.17 21.6
 4 -1 3 315.97 21.5
 -5 1 -3 21.7 2.8
 5 -1 3 22.3 3
 -6 1 -3 498.75 35
 6 -1 3 517.35 34.9
 -7 1 -3 57.89 5.5
 7 -1 3 71.99 6.5
 -8 1 -3 131.09 11.6
 -8 1 -3 148.09 11.3
 8 -1 3 161.48 12.2
 -9 1 -3 21.5 3.6
 9 -1 3 20 4.3
 9 -1 3 23 4.3
 -10 1 -3 33.2 4.4
 -11 1 -3 25 3.6
 -11 0 3 1.5 2.1
 -10 0 3 0.6 2
 9 0 -3 53.59 8.4
 -9 0 3 54.09 5.6
 8 0 -3 608.84 42.6
 -8 0 3 614.44 41.6
 7 0 -3 -1.1 1.6
 -7 0 3 2.5 1.7
 -7 0 3 -1 2.7
 -7 0 3 0.8 2.7
 6 0 -3 410.16 28.6
 -6 0 3 416.26 28.8
 -6 0 3 403.66 30.7
 5 0 -3 1270.07 84.89
 -5 0 3 1274.77 84.99
 4 0 -3 667.63 44.1
 -4 0 3 643.64 44.2
 3 0 -3 84.79 6.5
 -3 0 3 90.29 6.7
 2 0 -3 1972.6 132.39
 -2 0 3 2043.1 132.49
 -1 0 3 1149.58 76.19
 0 0 -3 97.39 7
 -1 0 -3 87.69 6.2
 -2 0 -3 1621.74 107.49
 2 0 3 1637.84 107.49
 -3 0 -3 12.2 1.8
 -3 0 -3 16.6 2.2
 3 0 3 12.7 1.8
 -4 0 -3 112.39 8.1
 -4 0 -3 94.59 8.2
 4 0 3 115.09 8.2
 -5 0 -3 51.89 4.8
 5 0 3 53.19 5
 6 0 3 466.75 32.3
 -7 0 -3 7.1 2.1
 7 0 3 4.5 2.3
 -8 0 -3 52.89 5.6
 8 0 3 53.29 6.3
 8 0 3 51.99 6.4
 -9 0 -3 162.18 12.7
 -10 0 -3 119.89 9.8
 -11 0 -3 49.6 5
 -12 1 3 148.29 10.9
 -11 1 3 105.69 8.7
 -10 1 3 21 3.3
 9 -1 -3 3.8 2.7
 -9 1 3 -1 1.5
 8 -1 -3 681.83 45.1
 -8 1 3 618.14 43.9
 7 -1 -3 312.87 21.5
 -7 1 3 291.87 23.7
 -7 1 3 281.67 20.5
 6 -1 -3 203.18 15
 -6 1 3 202.18 15.1
 5 -1 -3 1947.91 129.59
 -5 1 3 1959.5 129.69
 4 -1 -3 227.78 15.8
 -4 1 3 222.18 15.9
 -3 1 3 345.27 23.5
 2 -1 -3 1982.9 135.49
 -2 1 3 2096.39 135.49
 -2 1 3 2083.89 135.29
 1 -1 -3 41.6 3.2
 -1 1 3 51.39 3.6
 0 -1 -3 433.06 29.8
 0 1 3 460.45 29.8
 -1 -1 -3 563.54 37
 1 1 3 546.85 37
 -2 -1 -3 221.98 15.7
 -2 -1 -3 225.68 15.9
 2 1 3 227.68 15.7
 2 1 3 238.78 15.7
 -3 -1 -3 7.6 1.8
 -3 -1 -3 5.4 1.4
 3 1 3 5.2 1.4
 -4 -1 -3 14.5 2.7
 -4 -1 -3 15.3 2.4
 4 1 3 19.1 2.5
 -5 -1 -3 4.7 2.2
 5 1 3 5.7 1.9
 -6 -1 -3 8.1 2.3
 6 1 3 7.4 2.4
 -7 -1 -3 35.4 4.6
 7 1 3 49.8 5.8
 7 1 3 48.6 5.7
 -8 -1 -3 226.98 16.5
 8 1 3 212.68 17.3
 -9 -1 -3 448.16 31.3
 -10 -1 -3 4.7 2.3
 -11 -1 -3 6.7 2.2
 -12 2 3 13.9 2.7
 -11 2 3 68.59 6.4
 -10 2 3 69.69 6.5
 9 -2 -3 42.2 5.6
 -9 2 3 41.2 4.6
 8 -2 -3 21.7 3.9
 -8 2 3 23.1 3.2
 -8 2 3 23.5 3.9
 -8 2 3 29.4 6.2
 7 -2 -3 92.59 8
 -7 2 3 92.99 9.9
 -7 2 3 84.19 7.1
 6 -2 -3 0 1.4
 -6 2 3 0.3 1.3
 -6 2 3 0.1 1.7
 5 -2 -3 276.47 19.4
 -5 2 3 272.97 19.2
 -5 2 3 277.07 19.4
 4 -2 -3 -1.7 1.1
 -4 2 3 0.3 1.1
 -4 2 3 -0.6 1
 3 -2 -3 1314.17 85.29
 -3 2 3 1290.07 84.99
 -3 2 3 1255.37 85.29
 2 -2 -3 2177.78 139.89
 -2 2 3 2065.39 139.49
 -2 2 3 2113.89 139.79
 1 -2 -3 1637.44 107.59
 1 -2 -3 1604.24 107.79
 -1 2 3 1654.23 107.79
 0 -2 -3 106.19 8.2
 0 -2 -3 112.79 8.1
 0 2 3 117.99 8.2
 -1 -2 -3 80.99 5.7
 -1 -2 -3 76.99 5.9
 1 2 3 66.69 5.8
 -2 -2 -3 18.5 2.6
 -2 -2 -3 15.4 2.1
 2 2 3 21.8 2.6
 -3 -2 -3 465.45 33.3
 -3 -2 -3 505.85 33.6
 3 2 3 474.85 33.4
 3 2 3 526.85 33.5
 -4 -2 -3 536.95 36.4
 4 2 3 507.25 36.1
 4 2 3 547.75 36.2
 -5 -2 -3 179.68 13.9
 5 2 3 178.68 13.8
 5 2 3 190.08 13.8
 -6 -2 -3 57.99 5.8
 6 2 3 63.19 6.6
 6 2 3 59.39 6.4
 -7 -2 -3 368.06 26.2
 7 2 3 374.76 27.1
 -8 -2 -3 -0.2 2.1
 8 2 3 -2.7 2.8
 -9 -2 -3 33.7 4.6
 -10 -2 -3 91.49 7.9
 -11 -2 -3 29.4 3.3
 -12 3 3 23.5 3.2
 -11 3 3 1.1 1.9
 -10 3 3 23.7 4.1
 -10 3 3 31.7 3.8
 9 -3 -3 7.4 2.9
 -9 3 3 11.8 2.5
 -9 3 3 12.1 3.3
 8 -3 -3 96.99 8.9
 -8 3 3 95.59 10.8
 -8 3 3 113.69 9.4
 -8 3 3 98.39 8
 7 -3 -3 338.07 23.5
 -7 3 3 336.67 25.8
 -7 3 3 310.67 22.6
 6 -3 -3 2291.17 149.49
 -6 3 3 2211.58 149.19
 5 -3 -3 1233.98 81.19
 -5 3 3 1209.18 81.09
 -5 3 3 1204.08 80.89
 4 -3 -3 106.79 8.4
 -4 3 3 111.99 8.1
 3 -3 -3 488.85 32.4
 -3 3 3 484.15 32.2
 -3 3 3 469.15 32.4
 2 -3 -3 128.89 9.2
 -2 3 3 126.99 9.3
 1 -3 -3 539.55 36.3
 -1 3 3 544.35 36.4
 0 -3 -3 768.22 50.59
 0 3 3 748.03 50.59
 -1 -3 -3 335.17 23.1
 1 3 3 335.07 23
 -2 -3 -3 0.2 1.5
 2 3 3 2.1 1.5
 -3 -3 -3 4630.44 304.87
 3 3 3 4609.34 304.77
 -4 -3 -3 1183.18 78.59
 4 3 3 1157.28 78.39
 -5 -3 -3 22.3 4
 5 3 3 24 3.9
 -6 -3 -3 0.7 2.1
 6 3 3 1.5 2.6
 -7 -3 -3 81.89 7.5
 7 3 3 76.19 8.4
 -8 -3 -3 50.49 5.8
 -9 -3 -3 127.59 10.5
 -10 -3 -3 253.17 18
 -12 4 3 116.79 9.1
 -11 4 3 32.7 3.7
 -11 4 3 20.9 3.8
 -10 4 3 56.29 5.5
 -10 4 3 55.49 6.5
 9 -4 -3 205.78 16.3
 -9 4 3 220.18 15.3
 -9 4 3 205.88 16.4
 -9 4 3 206.98 18.8
 8 -4 -3 416.46 30.1
 -8 4 3 418.96 32.5
 -8 4 3 439.96 30.7
 -8 4 3 423.16 29.2
 7 -4 -3 2062.49 132.89
 -7 4 3 1893.81 131.99
 -7 4 3 2026.4 135.29
 6 -4 -3 272.57 19.5
 -6 4 3 274.77 19.2
 -6 4 3 268.17 21.4
 5 -4 -3 1206.48 80.99
 -5 4 3 1217.48 80.69
 4 -4 -3 1.5 1.3
 -4 4 3 -0.5 1
 -4 4 3 -0.4 1.3
 3 -4 -3 725.53 48
 -3 4 3 706.73 47.9
 2 -4 -3 560.94 37.2
 -2 4 3 545.15 37.2
 1 -4 -3 20.8 2.6
 -1 4 3 19.3 2.6
 0 -4 -3 3878.81 253.97
 0 4 3 3822.32 253.77
 -1 -4 -3 639.64 42.6
 1 4 3 619.74 42.4
 -2 -4 -3 219.68 15.7
 2 4 3 211.78 15.5
 -3 -4 -3 -0.4 1.7
 3 4 3 1 1.7
 -4 -4 -3 467.05 33
 4 4 3 479.15 33.1
 -5 -4 -3 423.86 29.9
 -5 -4 -3 408.86 29.1
 5 4 3 425.46 30
 -6 -4 -3 809.52 55.39
 6 4 3 823.92 56.49
 -7 -4 -3 329.27 23.3
 7 4 3 319.37 24.6
 -8 -4 -3 49.4 5.9
 -9 -4 -3 0.5 2.3
 -10 -4 -3 7.8 2.1
 -12 5 3 0.8 2.1
 -12 5 3 7.1 2.1
 -11 5 3 98.59 7.5
 -11 5 3 79.29 8.2
 -10 5 3 353.36 25.7
 -10 5 3 342.17 24.2
 9 -5 -3 16.2 3.8
 -9 5 3 15.8 2.7
 -9 5 3 10.8 3.6
 -9 5 3 20.9 5.7
 8 -5 -3 -0.1 1.9
 -8 5 3 5 3.6
 -8 5 3 1.4 1.5
 7 -5 -3 73.99 6.7
 -7 5 3 56.29 5.6
 -7 5 3 77.49 9
 6 -5 -3 320.57 21.8
 -6 5 3 291.47 23.8
 -6 5 3 303.77 21.4
 5 -5 -3 190.48 12.4
 -5 5 3 142.39 11.7
 4 -5 -3 325.37 22.6
 3 -5 -3 104.09 8
 -3 5 3 102.69 8
 2 -5 -3 752.32 47.5
 -2 5 3 660.03 47.3
 1 -5 -3 7.3 2
 -1 5 3 7.9 1.8
 0 -5 -3 56.99 5.3
 0 5 3 54.89 5
 -1 -5 -3 110.59 8.6
 1 5 3 101.19 8.2
 -2 -5 -3 252.47 18.1
 2 5 3 244.98 17.8
 -3 -5 -3 247.78 17.9
 3 5 3 235.48 17.7
 -4 -5 -3 229.78 17.5
 4 5 3 233.98 17.6
 -5 -5 -3 36.2 4.3
 -5 -5 -3 26 4.9
 5 5 3 29.2 5
 -6 -5 -3 10.6 3
 6 5 3 7 3.6
 -7 -5 -3 233.98 17.5
 -8 -5 -3 -1.5 2.3
 -9 -5 -3 127.19 10
 9 5 3 128.79 10.5
 -12 6 3 77.09 6.5
 -12 6 3 85.59 7.3
 -11 6 3 257.17 19.6
 -11 6 3 264.87 18.4
 -10 6 3 71.39 9.7
 -10 6 3 70.39 7.9
 -10 6 3 71.79 6.3
 9 -6 -3 10.4 3.1
 -9 6 3 10.3 2.3
 -9 6 3 14.3 4.2
 -9 6 3 12 5.1
 8 -6 -3 31.1 4.7
 -8 6 3 29.8 3.6
 -8 6 3 32.3 6.7
 7 -6 -3 742.53 51.79
 -7 6 3 807.02 51.09
 -7 6 3 725.43 54.29
 6 -6 -3 99.79 8.2
 -6 6 3 90.49 10.2
 5 -6 -3 253.97 17.5
 -5 6 3 227.78 19.4
 4 -6 -3 156.98 11.8
 3 -6 -3 181.78 13.4
 2 -6 -3 221.48 15.3
 -2 6 3 199.68 15.6
 1 -6 -3 394.26 27.9
 -1 6 3 411.96 27.7
 0 -6 -3 188.18 13.3
 0 6 3 164.28 12.7
 -1 -6 -3 17.4 3.2
 1 6 3 18.9 2.9
 -2 -6 -3 43.3 4.9
 2 6 3 31.9 4.3
 -3 -6 -3 130.49 10.8
 3 6 3 123.09 10.5
 -4 -6 -3 11.2 3.4
 -4 -6 -3 11.1 3
 4 6 3 4.7 2.8
 -5 -6 -3 51.59 7.1
 -5 -6 -3 68.69 6.8
 -6 -6 -3 9.9 3.1
 -7 -6 -3 82.79 7.6
 7 6 3 72.79 8
 -8 -6 -3 20.2 3.5
 8 6 3 20.4 3.9
 -9 -6 -3 41 4.2
 -12 7 3 7 2.5
 -11 7 3 78.69 8.3
 -11 7 3 86.99 6.8
 -10 7 3 211.08 19.9
 -10 7 3 232.38 16.3
 -10 7 3 238.68 18.3
 -9 7 3 20.1 5
 -9 7 3 21.8 3.1
 -9 7 3 24.5 6.4
 8 -7 -3 1441.96 97.79
 -8 7 3 1418.26 100.99
 -8 7 3 1495.85 96.79
 7 -7 -3 77.99 7.6
 -7 7 3 74.19 6.6
 -7 7 3 89.09 10.6
 6 -7 -3 37.5 4.7
 -6 7 3 30 6.5
 5 -7 -3 4.1 1.8
 -5 7 3 5.9 3.7
 4 -7 -3 5.6 2
 -4 7 3 4.2 3.3
 3 -7 -3 465.25 32.2
 2 -7 -3 4.6 2.1
 1 -7 -3 129.69 10.5
 0 -7 -3 69.29 6.7
 -1 -7 -3 27.3 4.1
 -2 -7 -3 165.88 13.1
 2 7 3 161.38 12.6
 -3 -7 -3 92.59 8.6
 3 7 3 89.29 7
 3 7 3 75.49 8.6
 3 7 3 84.79 8
 -4 -7 -3 802.22 57.39
 4 7 3 862.41 57.19
 -5 -7 -3 357.46 25.2
 -5 -7 -3 320.57 25.9
 5 7 3 370.26 25.7
 -6 -7 -3 -2.1 2.6
 6 7 3 -0.1 2.6
 -7 -7 -3 117.29 10.2
 7 7 3 129.79 10.7
 -8 -7 -3 12.6 2.6
 8 7 3 8.1 2.7
 -12 8 3 175.08 13.5
 -11 8 3 167.48 13.9
 -11 8 3 168.68 12
 -10 8 3 37.9 3.9
 -10 8 3 36.6 5.9
 -10 8 3 29.5 7.2
 -9 8 3 179.98 13.5
 -9 8 3 214.28 18.1
 -9 8 3 153.58 15.3
 8 -8 -3 39.4 5.4
 -8 8 3 29.5 3.8
 -8 8 3 49.9 8.9
 7 -8 -3 7.3 2.8
 -7 8 3 4.5 3.9
 -7 8 3 8.8 4.6
 -7 8 3 6.7 1.9
 6 -8 -3 82.69 7.8
 -6 8 3 85.39 9.9
 -6 8 3 80.29 10.4
 5 -8 -3 69.59 6.6
 -5 8 3 65.49 9
 4 -8 -3 193.98 15.1
 -4 8 3 208.78 18.2
 3 -8 -3 189.98 13.9
 -3 8 3 169.98 16.3
 2 -8 -3 4.7 2.3
 -2 8 3 2.9 3.2
 1 -8 -3 662.73 42.6
 -1 8 3 572.24 44.8
 0 -8 -3 14.9 3.3
 0 8 3 15.6 3.1
 -1 -8 -3 355.26 29.1
 1 8 3 374.66 28.8
 1 8 3 452.05 28.3
 1 8 3 467.05 30
 -2 -8 -3 216.28 17.6
 2 8 3 220.38 17.1
 2 8 3 236.68 18.1
 2 8 3 245.98 16.5
 -3 -8 -3 -2.5 2.6
 3 8 3 -0.5 3.1
 3 8 3 0.3 2.3
 3 8 3 1.2 1.7
 -4 -8 -3 3.6 3.5
 4 8 3 4 3.9
 4 8 3 1.6 2.6
 -5 -8 -3 6.3 4.7
 5 8 3 -1.2 2.4
 -6 -8 -3 0.7 2.5
 6 8 3 4.6 2.8
 -7 -8 -3 38.8 4.7
 7 8 3 40.1 5
 -12 9 3 0.5 2
 -11 9 3 91.79 8.8
 -10 9 3 348.67 23.2
 -10 9 3 348.87 25.4
 -10 9 3 318.47 27.6
 -9 9 3 32.6 5.5
 -9 9 3 26.1 3.3
 -9 9 3 26 6.9
 8 -9 -3 20.4 4.2
 -8 9 3 25.6 3.1
 -8 9 3 21.2 6.5
 7 -9 -3 53.59 6.7
 -7 9 3 54.09 9.7
 -7 9 3 60.69 5.5
 -7 9 3 69.19 9.1
 6 -9 -3 16.3 3.5
 -6 9 3 19.8 6.1
 -6 9 3 7.2 4.1
 5 -9 -3 4.7 2.6
 -5 9 3 10 4.3
 -5 9 3 3.7 4.2
 -5 9 3 6 4.3
 -5 9 3 7.8 2.4
 4 -9 -3 1.9 2.3
 -4 9 3 0.9 3.5
 -4 9 3 6.9 3.7
 -4 9 3 2.6 3.8
 -4 9 3 3.2 2.1
 3 -9 -3 565.54 39.3
 -3 9 3 598.74 41.1
 -3 9 3 600.54 38.5
 -3 9 3 538.55 42.3
 -3 9 3 516.65 40.2
 2 -9 -3 107.29 10
 -2 9 3 121.09 11.3
 -2 9 3 116.69 12.6
 -2 9 3 124.69 9.2
 1 -9 -3 336.97 22.4
 -1 9 3 295.27 21.1
 -1 9 3 280.87 22.9
 -1 9 3 298.87 21.8
 0 -9 -3 414.76 30.3
 0 9 3 442.46 29.2
 0 9 3 412.26 29.8
 0 9 3 426.36 31
 -1 -9 -3 52.39 6.5
 1 9 3 57.69 7.7
 1 9 3 56.29 6.2
 1 9 3 53.69 5.2
 -2 -9 -3 101.99 9.2
 2 9 3 83.49 7.4
 2 9 3 100.79 8.7
 2 9 3 73.19 9.4
 -3 -9 -3 8.9 3.7
 3 9 3 10 3.3
 3 9 3 15.5 2.7
 3 9 3 23.4 4.9
 4 9 3 29.5 5.1
 4 9 3 43.5 6.5
 5 9 3 41.5 5.7
 6 9 3 8.4 2.8
 -12 10 3 78.49 7
 -11 10 3 60.49 6.6
 -10 10 3 194.28 17.7
 -10 10 3 173.68 14.8
 -9 10 3 38 7.9
 -9 10 3 21.5 4.6
 -9 10 3 20.6 2.8
 -8 10 3 86.69 6.4
 -8 10 3 68.29 9.5
 -8 10 3 71.99 8.3
 7 -10 -3 1.5 2.6
 -7 10 3 15.2 5
 -7 10 3 3.9 1.7
 -7 10 3 1.4 4.4
 6 -10 -3 2.8 2.5
 -6 10 3 3.7 4.9
 -6 10 3 6.4 3.9
 5 -10 -3 131.59 10.7
 -5 10 3 115.79 12.4
 -5 10 3 139.79 14.7
 -5 10 3 100.19 12.1
 -5 10 3 107.29 9.7
 -4 10 3 47.9 4.8
 -4 10 3 32.5 6.5
 -4 10 3 32.9 6.8
 3 -10 -3 84.59 8.4
 -3 10 3 85.39 10
 -3 10 3 87.99 9.9
 -3 10 3 83.89 7.4
 -3 10 3 85.09 11.2
 2 -10 -3 113.59 9.8
 -2 10 3 92.49 10.9
 -2 10 3 104.09 8.5
 -2 10 3 103.79 11
 1 -10 -3 210.38 16.6
 -1 10 3 218.58 17.8
 -1 10 3 223.38 18.3
 -1 10 3 202.58 15.4
 -1 10 3 204.58 16.1
 0 -10 -3 78.09 9.2
 0 10 3 119.69 10.9
 0 10 3 92.89 9
 0 10 3 111.89 8.3
 -1 -10 -3 512.15 39.3
 1 10 3 605.44 40.4
 1 10 3 547.85 38.9
 1 10 3 565.44 38.2
 -2 -10 -3 31.6 5.6
 2 10 3 35.9 5.4
 2 10 3 32.4 4.2
 2 10 3 36.6 6.4
 3 10 3 317.87 23
 3 10 3 347.97 24.2
 3 10 3 315.27 24.9
 4 10 3 61.49 7.9
 4 10 3 51.69 6.5
 5 10 3 137.09 11.3
 6 10 3 6.3 3.8
 -11 11 3 49.8 5.4
 -10 11 3 41.2 5.4
 -9 11 3 4.9 2.7
 -9 11 3 0.7 3.7
 -8 11 3 -1.1 2.4
 -8 11 3 -0.4 1.3
 -8 11 3 0.7 4.2
 -8 11 3 -1.5 3.2
 -7 11 3 96.69 7.6
 -7 11 3 81.59 12.6
 -7 11 3 105.09 11.2
 6 -11 -3 59.29 7
 -6 11 3 58.59 6.9
 -6 11 3 72.09 11.2
 -6 11 3 49.1 8.6
 5 -11 -3 59.29 6.9
 -5 11 3 57.29 9
 -5 11 3 50.89 5.7
 -5 11 3 44.6 8.1
 -5 11 3 66.29 10.6
 4 -11 -3 174.78 12.8
 -4 11 3 125.39 14
 -4 11 3 124.99 13.9
 -4 11 3 129.59 11.2
 -4 11 3 180.68 17.1
 3 -11 -3 -1.5 2.5
 -3 11 3 3.3 4.1
 -3 11 3 3.7 3.9
 -3 11 3 -1.4 1.7
 2 -11 -3 6.1 3
 -2 11 3 4.2 2.1
 -2 11 3 5.3 4.2
 -2 11 3 4.6 4
 1 -11 -3 35.7 5.6
 -1 11 3 46.5 7.5
 -1 11 3 42.9 5.8
 -1 11 3 39.3 4.9
 0 -11 -3 3.2 3.2
 0 11 3 5.4 2.2
 0 11 3 10.8 4.6
 0 11 3 7.7 3
 1 11 3 5.4 2.2
 1 11 3 8.9 3.3
 1 11 3 9.2 4.6
 2 11 3 2.3 4
 2 11 3 2.7 2.1
 2 11 3 9.2 3.3
 3 11 3 160.48 14
 3 11 3 152.98 12.7
 4 11 3 6.8 2.7
 5 11 3 1.8 2.9
 -11 12 3 6 2.1
 -10 12 3 39.5 4.9
 -10 12 3 46.1 7.4
 -9 12 3 0.5 3.4
 -9 12 3 -1.1 3.2
 -9 12 3 0.7 2.2
 -8 12 3 43.8 7.5
 -8 12 3 37.1 5.4
 -8 12 3 60.49 9.5
 -7 12 3 27.2 7.4
 -6 12 3 3.4 2.5
 -6 12 3 5.8 3.7
 -6 12 3 3.2 1.7
 -6 12 3 1.4 4.7
 -5 12 3 127.99 11
 -5 12 3 132.19 14.1
 -5 12 3 143.69 14.3
 -5 12 3 158.68 16.9
 -4 12 3 71.99 10
 -4 12 3 81.19 10.2
 -4 12 3 59.99 6.5
 3 -12 -3 59.49 7
 -3 12 3 58.89 5.9
 -3 12 3 55.89 8.9
 -3 12 3 58.99 8.8
 -2 12 3 33 7
 -2 12 3 28.5 4.2
 -2 12 3 29.8 6.4
 -1 12 3 22.7 4.6
 -1 12 3 35.4 4.5
 -1 12 3 49.1 7.6
 0 12 3 60.39 8.4
 0 12 3 44.8 6
 0 12 3 43.6 5.2
 1 12 3 31.5 5
 1 12 3 36.7 4.5
 1 12 3 51.89 7.4
 2 12 3 5.2 2.9
 2 12 3 11.9 4.5
 2 12 3 10 2.5
 3 12 3 28.8 5
 3 12 3 16.8 3.6
 -10 13 3 39 4.3
 -9 13 3 60.09 7.7
 -8 13 3 38.9 6.7
 -8 13 3 36 7.7
 -7 13 3 7.3 5.4
 -7 13 3 3.6 3.8
 -6 13 3 0.9 2.1
 -6 13 3 0 3.5
 -5 13 3 27.5 6.4
 -5 13 3 24 3.8
 -4 13 3 11.8 5.5
 -4 13 3 11 4.8
 -4 13 3 13.7 3
 -3 13 3 8.3 4.3
 -3 13 3 6.6 5.1
 -3 13 3 9.9 2.6
 -2 13 3 59.59 5.9
 -2 13 3 52.19 8.5
 -2 13 3 58.49 8.9
 -1 13 3 89.99 11
 -1 13 3 76.59 7.3
 0 13 3 1 2.9
 0 13 3 2.1 4.5
 0 13 3 0.8 2
 1 13 3 49 4.9
 1 13 3 51.99 7.3
 1 13 3 41.5 5.6
 2 13 3 1.8 2.4
 2 13 3 0.4 1.7
 2 13 3 3.8 3.6
 -9 14 3 17.6 4
 -9 14 3 18.2 2.9
 -8 14 3 1.2 2.9
 -7 14 3 9.7 4.1
 -6 14 3 18.1 5.4
 -6 14 3 20.5 3.3
 -5 14 3 6.9 4.3
 -5 14 3 1.7 2.1
 -4 14 3 111.99 10.5
 -4 14 3 155.68 13.8
 -4 14 3 142.89 13.6
 -3 14 3 65.09 8.6
 -3 14 3 65.89 9.2
 -3 14 3 60.69 6.1
 -2 14 3 6.2 2.4
 -2 14 3 10.3 4.9
 -1 14 3 21 3.4
 -1 14 3 25.8 5.7
 0 14 3 17.5 4.8
 0 14 3 14.8 2.7
 1 14 3 62.59 7
 1 14 3 41.3 4.5
 -8 15 3 3 2.8
 -7 15 3 23.6 5
 -6 15 3 34.6 5.9
 -6 15 3 31.2 3.8
 -5 15 3 9 2.2
 -5 15 3 1.9 3.4
 -4 15 3 11.4 2.5
 -4 15 3 14.8 4.5
 -3 15 3 2.3 3.6
 -3 15 3 3.6 2
 -3 15 3 5.2 4
 -2 15 3 37.4 6
 -2 15 3 35.1 4.1
 -1 15 3 -3.9 2.9
 -1 15 3 1.8 1.7
 -5 16 3 5.2 2.2
 -5 16 3 2.9 2.8
 -4 16 3 12.7 2.2
 -2 16 -4 41.8 4
 -3 16 -4 -0.2 1.4
 -4 16 -4 3.4 1.7
 -4 16 -4 3.5 3.4
 -5 16 -4 23.8 4.7
 -5 16 -4 15.4 2.6
 -6 16 -4 26.9 4.9
 -6 16 -4 26.2 3.2
 -7 16 -4 4.1 3
 -7 16 -4 4.8 2.2
 0 15 -4 3 3.1
 0 15 -4 3.9 2.7
 -1 15 -4 8.2 3.7
 -1 15 -4 5.4 3
 -1 15 -4 3.8 2
 -2 15 -4 7.8 4.1
 -2 15 -4 5.4 2.2
 -2 15 -4 8.8 3.3
 -3 15 -4 35.2 6.4
 -3 15 -4 37.6 5.5
 -3 15 -4 33.1 6
 -3 15 -4 33.4 4.3
 -4 15 -4 34.6 5.1
 -4 15 -4 20.5 3.4
 -4 15 -4 17.9 5.4
 -5 15 -4 8.2 4.4
 -5 15 -4 5.6 2.2
 -6 15 -4 5.8 4.1
 -6 15 -4 3.3 2
 -7 15 -4 36.8 6.3
 -7 15 -4 34.8 4.1
 -8 15 -4 -0.8 1.8
 -8 15 -4 -0.6 2.8
 -8 15 -4 1.8 1.7
 2 14 -4 0.2 2.6
 2 14 -4 4.5 2.6
 1 14 -4 24.3 4.6
 1 14 -4 14.7 3.7
 0 14 -4 13.2 3.7
 0 14 -4 4.2 2.2
 0 14 -4 8.8 4
 -1 14 -4 25.1 4.7
 -1 14 -4 19 5
 -1 14 -4 20.8 3.3
 -2 14 -4 146.69 13.1
 -2 14 -4 159.48 13.7
 -2 14 -4 139.79 14.2
 -2 14 -4 159.68 11.8
 -3 14 -4 6 4.2
 -3 14 -4 -1.4 2.2
 -3 14 -4 -0.6 4.3
 -3 14 -4 0.8 3.5
 -4 14 -4 70.99 8.3
 -4 14 -4 68.89 6.8
 -4 14 -4 66.39 9.4
 -5 14 -4 13.9 5
 -5 14 -4 11.1 3
 -5 14 -4 11.8 3.8
 -6 14 -4 4 4.2
 -6 14 -4 3.6 2.2
 -7 14 -4 13.3 3.1
 -7 14 -4 15.9 3.3
 -7 14 -4 18.8 5.4
 -8 14 -4 4.2 3.6
 -8 14 -4 8.5 2.6
 -8 14 -4 5.3 2.3
 -9 14 -4 1.8 2
 -9 14 -4 -0.5 3
 3 13 -4 2.5 2.9
 3 13 -4 13.2 3.3
 2 13 -4 -2.2 2.4
 2 13 -4 -2.9 3
 1 13 -4 86.49 9.3
 1 13 -4 109.39 10.5
 0 13 -4 1.6 2.1
 0 13 -4 5.4 3.4
 0 13 -4 -0.8 3.7
 -1 13 -4 -3 3.3
 -1 13 -4 1.8 2.1
 -1 13 -4 1.8 2.9
 -2 13 -4 -0.9 2.9
 -2 13 -4 1 4.3
 -2 13 -4 2.1 3.7
 -2 13 -4 4 2.3
 -3 13 -4 2.7 3.7
 -3 13 -4 4.1 4.3
 -3 13 -4 2.8 2.5
 -3 13 -4 4.3 4
 -4 13 -4 3.8 3.6
 -4 13 -4 12.4 5.1
 -4 13 -4 7 2.8
 -5 13 -4 23.4 4.1
 -5 13 -4 27.7 6.4
 -5 13 -4 19.1 4.9
 -6 13 -4 -0.2 2.2
 -6 13 -4 2.3 4
 -6 13 -4 -0.5 2.4
 -7 13 -4 4 2.4
 -7 13 -4 3.6 4.2
 -7 13 -4 1.2 2.6
 -8 13 -4 8.5 2.9
 -8 13 -4 8.6 4.7
 -8 13 -4 4.8 2.6
 -9 13 -4 5.5 2.7
 -9 13 -4 8.5 4.1
 -10 13 -4 35.7 4.2
 4 12 -4 5.1 3.1
 4 12 -4 5.5 2.7
 3 12 -4 24 4.8
 3 12 -4 18 4
 2 12 -4 7 3.4
 2 12 -4 18 4.8
 1 12 -4 1.9 2.8
 1 12 -4 -0.4 3.6
 0 12 -4 15.1 4.6
 0 12 -4 17.7 3.2
 0 12 -4 24.4 4.8
 -1 12 -4 59.39 7.9
 -1 12 -4 63.99 7.8
 -1 12 -4 55.09 6
 1 -12 4 50.29 6.6
 -2 12 -4 81.39 9.3
 -2 12 -4 77.39 10
 -2 12 -4 87.69 9.1
 -2 12 -4 74.99 7.5
 -3 12 -4 2.1 3.9
 -3 12 -4 5.2 2.5
 -3 12 -4 3.5 3.5
 -3 12 -4 3.2 3.3
 -4 12 -4 98.79 9
 -4 12 -4 87.39 11.3
 -4 12 -4 116.09 11
 -5 12 -4 194.48 16.6
 -5 12 -4 198.48 15.2
 -5 12 -4 194.28 15.1
 -5 12 -4 192.08 17.9
 -6 12 -4 1.7 2.5
 -6 12 -4 -3.7 2.4
 -6 12 -4 -1.9 3.7
 -7 12 -4 59.59 9.2
 -7 12 -4 54.39 6.4
 -7 12 -4 56.89 6.2
 -8 12 -4 -1.7 2.4
 -8 12 -4 4.8 2.8
 -8 12 -4 3.1 4.2
 -9 12 -4 11.3 3.1
 -10 12 -4 14.9 3
 -10 12 -4 16.9 3.2
 -11 12 -4 22.2 3.3
 -11 12 -4 27.1 3.4
 5 11 -4 10.8 3.1
 5 11 -4 10.7 3.4
 4 11 -4 84.89 9.1
 4 11 -4 93.79 8.9
 3 11 -4 81.89 8.8
 3 11 -4 64.69 8
 2 11 -4 7.9 4
 2 11 -4 5.2 3.4
 1 11 -4 3.9 3.1
 1 11 -4 3.7 2.7
 1 11 -4 3.8 3.5
 1 11 -4 4 2.2
 -1 -11 4 4.2 3.4
 0 11 -4 17.6 3.2
 0 11 -4 21.3 4.1
 0 11 -4 17.5 4.4
 0 11 -4 26.1 4.7
 0 -11 4 33.8 4.9
 -1 11 -4 6.6 3.3
 -1 11 -4 5.7 3
 -1 11 -4 9.5 4.5
 -1 11 -4 5.2 2.2
 1 -11 4 1.9 2.6
 -2 11 -4 193.78 14.7
 -2 11 -4 203.78 16.1
 -2 11 -4 177.68 15.7
 -2 11 -4 203.88 17.4
 -3 11 -4 60.99 8.1
 -3 11 -4 72.09 9.1
 -3 11 -4 52.19 8.1
 -3 11 -4 75.69 8.1
 -3 11 -4 67.19 6.7
 -4 11 -4 77.99 7.1
 -4 11 -4 73.39 7
 -4 11 -4 68.79 9.1
 -4 11 -4 55.69 8.4
 -4 11 -4 59.99 8.1
 -5 11 -4 47.8 5.9
 -5 11 -4 49.6 5.7
 -5 11 -4 41.9 7.9
 -5 11 -4 49 7.3
 -6 11 -4 94.89 9
 -6 11 -4 112.89 9.4
 -6 11 -4 91.59 11.8
 -7 11 -4 164.88 13.5
 -7 11 -4 183.48 17
 -8 11 -4 24.3 4.2
 -8 11 -4 17.5 5.9
 -8 11 -4 22.1 4
 -9 11 -4 -0.6 2.7
 -9 11 -4 1.4 2.4
 -10 11 -4 35.3 4.7
 -10 11 -4 31.4 4.6
 -11 11 -4 62.19 6.2
 -11 11 -4 69.79 6.4
 6 10 -4 15.3 3.4
 6 10 -4 26.2 4.1
 5 10 -4 25.7 4.5
 5 10 -4 13 3.5
 4 10 -4 119.09 11.1
 4 10 -4 101.29 10.2
 3 10 -4 235.18 18.6
 3 10 -4 243.88 19.3
 2 10 -4 36.7 6.2
 2 10 -4 39.9 5.8
 2 10 -4 30.4 5
 -2 -10 4 42.7 6
 1 10 -4 16.8 3.7
 1 10 -4 18 4.5
 1 10 -4 20.3 3.3
 1 10 -4 24.6 4.4
 -1 -10 4 30.3 4.8
 0 10 -4 24.3 4
 0 10 -4 28.2 5
 0 10 -4 19.1 3.3
 0 10 -4 27.6 4.7
 0 -10 4 26.4 4.3
 -1 10 -4 6.7 3
 -1 10 -4 17.5 3.8
 -1 10 -4 20 5.2
 -1 10 -4 16.5 2.8
 -2 10 -4 501.65 34.4
 -2 10 -4 431.26 32.6
 -2 10 -4 490.45 32
 -2 10 -4 476.35 33.1
 2 -10 4 410.56 31.7
 -3 10 -4 154.38 14.9
 -3 10 -4 180.68 14.8
 -3 10 -4 168.38 13
 -3 10 -4 162.08 13.8
 -4 10 -4 53.79 7.5
 -4 10 -4 64.79 6.3
 -4 10 -4 70.79 8.8
 -4 10 -4 62.89 6.2
 -4 10 -4 46.6 7.5
 -5 10 -4 218.88 18
 -5 10 -4 217.48 19
 -5 10 -4 188.98 20.3
 -5 10 -4 226.88 16.8
 -5 10 -4 267.17 20
 -6 10 -4 44.8 5.3
 -6 10 -4 31.6 7.6
 -6 10 -4 36.4 7.2
 -6 10 -4 36.6 7.2
 -7 10 -4 -0.7 2.1
 -7 10 -4 -1.7 2.3
 -7 10 -4 6.7 4.7
 -7 10 -4 0.2 3.9
 -8 10 -4 26.7 4.7
 -9 10 -4 81.59 8.3
 -10 10 -4 176.58 14.2
 -10 10 -4 183.58 14.5
 -11 10 -4 2.5 2.3
 -11 10 -4 4.1 2.5
 -12 10 -4 17.7 3.1
 7 9 -4 119.89 9.8
 6 9 -4 63.29 7.1
 6 9 -4 73.29 7.4
 5 9 -4 -2.3 3
 5 9 -4 1.9 2.7
 4 9 -4 3.9 3.4
 4 9 -4 0.8 2.5
 3 9 -4 45.9 6.1
 3 9 -4 45.9 6
 3 9 -4 46.8 6.6
 -3 -9 4 42.1 6.4
 2 9 -4 6.6 2.7
 2 9 -4 5.6 2.8
 2 9 -4 8 3.3
 -2 -9 4 4.4 3
 1 9 -4 4.6 2.4
 1 9 -4 1.6 2.3
 1 9 -4 4 1.8
 1 9 -4 2.2 2.7
 -1 -9 4 2.1 2.4
 0 9 -4 314.77 21.6
 0 9 -4 293.27 22.3
 0 9 -4 294.77 22.5
 0 9 -4 313.97 22.5
 0 -9 4 317.67 22.1
 -1 9 -4 26 4.1
 1 -9 4 20.7 3.3
 -2 9 -4 4.4 2.9
 -2 9 -4 3.6 2.6
 2 -9 4 4.8 1.9
 -3 9 -4 9.6 3.4
 -3 9 -4 6.8 3.1
 -4 9 -4 89.69 9.6
 -4 9 -4 111.99 12.4
 -4 9 -4 104.79 11.7
 -4 9 -4 107.29 10.5
 -4 9 -4 89.29 8.4
 -4 9 -4 100.79 11.9
 -5 9 -4 14.1 3.8
 -5 9 -4 8.9 2.3
 -5 9 -4 24.3 3.5
 -5 9 -4 20.2 5.4
 -5 9 -4 4.6 3.9
 -5 9 -4 4.3 4.2
 -5 9 -4 6.2 3.6
 -6 9 -4 39.6 4.8
 -6 9 -4 41 5.3
 -6 9 -4 25.6 6.1
 -6 9 -4 43.2 7.5
 -7 9 -4 42.9 5.9
 -7 9 -4 39.4 5
 -7 9 -4 45.7 8.1
 -8 9 -4 74.79 8
 -9 9 -4 145.99 12.8
 -10 9 -4 1.7 2.8
 -11 9 -4 2.1 2.6
 -11 9 -4 6.1 2.6
 -12 9 -4 6.7 2.5
 7 8 -4 16 3.6
 6 8 -4 3 3.1
 6 8 -4 2.1 2.6
 5 8 -4 106.19 9.6
 5 8 -4 98.29 10.1
 4 8 -4 12.6 4.1
 4 8 -4 22.8 4.1
 -4 -8 4 20.8 4.7
 3 8 -4 403.76 28.6
 3 8 -4 397.36 28.5
 3 8 -4 419.56 29.2
 -3 -8 4 378.76 28.8
 2 8 -4 14.9 3.7
 2 8 -4 13.2 3.1
 2 8 -4 10.7 2.9
 -2 -8 4 14.3 3.5
 1 8 -4 534.65 38.2
 1 8 -4 557.14 39.5
 -1 -8 4 566.34 38.2
 0 8 -4 1789.02 118.89
 0 -8 4 1774.42 118.49
 -1 8 -4 176.18 13.3
 1 -8 4 149.39 11.9
 -2 8 -4 248.98 21.8
 -2 8 -4 257.77 19.6
 2 -8 4 261.07 18
 -3 8 -4 161.08 13.6
 -3 8 -4 172.78 15.7
 -3 8 -4 146.89 15.1
 -4 8 -4 78.89 9.7
 -4 8 -4 82.89 8.7
 -4 8 -4 81.99 7.9
 -4 8 -4 64.69 8.8
 -5 8 -4 365.96 31.5
 -5 8 -4 434.56 30.2
 -5 8 -4 456.25 32.9
 -5 8 -4 431.56 31.5
 -6 8 -4 312.67 22
 -6 8 -4 283.37 23.6
 -6 8 -4 328.87 21
 -6 8 -4 282.27 24.1
 -6 8 -4 287.47 20.9
 -6 8 -4 286.97 23.7
 -7 8 -4 473.45 33.1
 -7 8 -4 383.26 30.6
 -8 8 -4 9.9 3.5
 -9 8 -4 10.3 3.7
 -10 8 -4 0.1 2.7
 -11 8 -4 3.3 2.5
 -11 8 -4 1.1 2.6
 -12 8 -4 3.8 2.3
 8 7 -4 11.2 2.9
 7 7 -4 36.6 6.6
 7 7 -4 43.9 5.7
 6 7 -4 30.6 5.1
 6 7 -4 21.7 4.4
 5 7 -4 85.09 8.2
 5 7 -4 99.89 9.2
 -5 -7 4 65.29 8.7
 4 7 -4 -1.4 2.7
 4 7 -4 1.5 2
 4 7 -4 -1.2 2.1
 -4 -7 4 0 2.8
 3 7 -4 35 4.8
 3 7 -4 40.2 5.5
 3 7 -4 32.1 4.5
 -3 -7 4 37.8 5.3
 2 7 -4 352.96 25.6
 -2 -7 4 371.46 25.9
 -1 -7 4 589.64 40.4
 0 7 -4 57.49 6
 0 -7 4 65.29 5.6
 -1 7 -4 286.67 21.2
 1 -7 4 291.27 20
 -2 7 -4 1.2 2.1
 2 -7 4 2.2 1.2
 -3 7 -4 148.39 12.8
 -3 7 -4 153.48 10.7
 -4 7 -4 50.09 6.6
 -5 7 -4 0.6 2.4
 -5 7 -4 0.7 1.4
 -5 7 -4 1.7 3
 -6 7 -4 1242.98 84.39
 -6 7 -4 1210.98 81.89
 -7 7 -4 159.28 13.2
 -8 7 -4 451.15 32.6
 -9 7 -4 77.59 8.4
 -10 7 -4 9.3 3.4
 -11 7 -4 141.59 12.1
 -12 7 -4 66.79 6.6
 8 6 -4 66.29 6.8
 7 6 -4 11.5 3.2
 7 6 -4 9.3 3.7
 6 6 -4 29.6 4.8
 6 6 -4 37.2 5.5
 -6 -6 4 26.9 5.4
 5 6 -4 21.8 4.4
 5 6 -4 26.1 4.2
 -5 -6 4 32.2 5.3
 4 6 -4 64.39 7.1
 4 6 -4 71.89 6.9
 4 6 -4 67.79 6.6
 -4 -6 4 66.89 7.5
 3 6 -4 34.9 4.2
 -3 -6 4 31.9 4.8
 -2 -6 4 206.58 15.5
 -1 -6 4 2.9 1.9
 0 6 -4 592.74 41.7
 0 -6 4 627.94 41.2
 -1 6 -4 1107.79 72.09
 -1 6 -4 1050.39 73.29
 1 -6 4 1103.99 72.19
 -2 6 -4 475.65 37.3
 -2 6 -4 569.74 36
 2 -6 4 566.04 36
 -3 6 -4 60.39 4.4
 -3 6 -4 56.39 6.6
 -4 6 -4 850.71 58.69
 -4 6 -4 854.71 57.29
 -5 6 -4 173.18 13.9
 -5 6 -4 163.28 12.4
 5 -6 4 161.68 11.8
 -6 6 -4 27.1 4.9
 -6 6 -4 25.3 4
 6 -6 4 22.3 3
 -7 6 -4 22.4 4.6
 -7 6 -4 7.2 3.1
 7 -6 4 17.9 2.8
 -8 6 -4 135.99 11.7
 -8 6 -4 135.39 10.8
 8 -6 4 131.79 10.7
 -9 6 -4 225.48 17.1
 9 -6 4 194.68 15.8
 -10 6 -4 22.7 4.6
 -11 6 -4 10.9 3.3
 -12 6 -4 3.1 2.2
 9 5 -4 98.19 8.7
 -9 -5 4 101.79 8.4
 8 5 -4 50.49 6.3
 -8 -5 4 61.79 6.6
 7 5 -4 65.89 10
 7 5 -4 69.79 7.3
 6 5 -4 1.5 2.4
 6 5 -4 1.7 2.8
 -6 -5 4 3.8 3.2
 5 5 -4 80.69 8.5
 5 5 -4 83.79 8.2
 5 5 -4 97.89 8.2
 -5 -5 4 99.99 9.3
 4 5 -4 83.09 7.5
 -4 -5 4 89.69 8.6
 -3 -5 4 0.5 2.1
 -2 -5 4 407.96 28.3
 -1 -5 4 484.65 32.9
 0 5 -4 112.79 8.6
 0 5 -4 105.19 7.8
 0 -5 4 107.49 7.9
 -1 5 -4 1.5 0.8
 -1 5 -4 1.3 1.6
 1 -5 4 1.9 0.9
 -2 5 -4 10.3 2.6
 2 -5 4 7.6 1.1
 -3 5 -4 479.25 33.9
 -3 5 -4 491.05 32.9
 -4 5 -4 414.66 27.6
 -4 5 -4 427.96 28.7
 4 -5 4 368.16 26.9
 -5 5 -4 46.2 4.8
 -5 5 -4 50.79 5.9
 5 -5 4 50.69 4.3
 -6 5 -4 138.29 11.5
 -6 5 -4 128.19 10.5
 6 -5 4 130.29 9.9
 -7 5 -4 22.8 4.9
 -7 5 -4 40.9 5.2
 7 -5 4 30 3.8
 -8 5 -4 169.48 14.2
 -8 5 -4 210.08 15.3
 -8 5 -4 213.88 16
 8 -5 4 218.88 15.3
 -9 5 -4 11.6 3.5
 -9 5 -4 7 2.2
 9 -5 4 9.5 2.9
 -10 5 -4 0.3 2.5
 -11 5 -4 337.17 24.5
 -12 5 -4 32.9 4.2
 -10 -4 4 10.2 2.4
 9 4 -4 -1.4 2.3
 -9 -4 4 1.6 2.5
 8 4 -4 262.57 20
 -8 -4 4 279.77 19.9
 -7 -4 4 130.49 12.6
 -7 -4 4 150.88 11.5
 6 4 -4 136.39 12.1
 -6 -4 4 153.68 12.8
 5 4 -4 185.28 16.1
 -5 -4 4 191.68 15.2
 4 4 -4 177.98 14.8
 -4 -4 4 187.18 14.2
 3 4 -4 96.89 7.5
 3 4 -4 86.49 7.4
 -3 -4 4 97.99 7.8
 -2 -4 4 791.02 53.09
 -1 -4 4 681.43 45.6
 0 4 -4 0.9 1.2
 0 4 -4 0.8 0.7
 0 -4 4 2 1
 -1 4 -4 13.3 2.5
 1 -4 4 16.3 1.5
 -2 4 -4 867.71 59.49
 -2 4 -4 900.11 58.79
 -3 4 -4 1432.56 92.29
 -3 4 -4 1393.86 91.59
 3 -4 4 1316.37 90.99
 -4 4 -4 53.49 4.9
 -4 4 -4 53.49 5.5
 4 -4 4 52.59 4.2
 -5 4 -4 39.3 4.6
 -5 4 -4 35.5 4.1
 5 -4 4 35.3 3.5
 -6 4 -4 325.17 23.3
 -6 4 -4 334.37 23.7
 6 -4 4 318.97 22.6
 -7 4 -4 164.98 12.3
 7 -4 4 159.88 12.3
 -8 4 -4 36.2 5.4
 -8 4 -4 48.1 4.6
 8 -4 4 53.39 5.4
 -9 4 -4 20 3.2
 -9 4 -4 20.2 3.9
 9 -4 4 16.2 3.5
 -10 4 -4 163.18 12.8
 -10 4 -4 142.49 11.5
 -11 4 -4 116.59 10
 -12 4 -4 20.3 3
 -10 -3 4 1.8 2.1
 -9 -3 4 6.1 2.8
 -8 -3 4 45.9 5.4
 -7 -3 4 115.39 9.5
 -7 -3 4 119.49 11.2
 6 3 -4 191.58 15.1
 6 3 -4 210.38 15.4
 6 3 -4 184.88 15
 -6 -3 4 194.58 16
 -6 -3 4 214.48 14.8
 -6 -3 4 203.28 18.2
 5 3 -4 6.3 2.2
 -5 -3 4 5.1 2.7
 4 3 -4 833.22 56.69
 -4 -3 4 858.61 57.09
 3 3 -4 2.2 1.3
 -3 -3 4 2.1 1.7
 2 3 -4 723.83 48.6
 -2 -3 4 736.93 48.9
 1 3 -4 553.34 38.3
 -1 -3 4 595.64 38.3
 0 3 -4 380.86 25.4
 0 3 -4 363.36 24.7
 -1 3 -4 119.49 9.1
 -1 3 -4 123.89 8.6
 -2 3 -4 442.86 31.3
 -2 3 -4 476.85 30.9
 -3 3 -4 88.99 7
 -3 3 -4 91.19 7.4
 3 -3 4 90.39 6.4
 -4 3 -4 177.88 13.3
 -4 3 -4 182.38 13
 4 -3 4 177.08 12.4
 -5 3 -4 0.3 1.4
 5 -3 4 -0.6 1.1
 -6 3 -4 588.84 39.5
 -6 3 -4 578.64 38.8
 6 -3 4 548.85 38.8
 -7 3 -4 4.2 2.3
 -7 3 -4 4.2 1.5
 -7 3 -4 5.7 2
 7 -3 4 4.2 2
 -8 3 -4 6.9 2.1
 -8 3 -4 5.1 2.6
 8 -3 4 16.9 3.2
 -9 3 -4 -0.3 1.9
 -9 3 -4 -0.2 2.1
 9 -3 4 1 2.3
 -10 3 -4 59.49 6.6
 -10 3 -4 64.99 6.1
 -11 3 -4 21.6 3.7
 -11 3 -4 25 3.4
 -11 -2 4 11.9 2.5
 -10 -2 4 54.69 5.7
 -9 -2 4 36.9 4.9
 -8 -2 4 165.18 12.7
 7 2 -4 199.28 15.9
 -7 -2 4 206.88 16.9
 -7 -2 4 210.98 19
 -7 -2 4 209.28 15.1
 6 2 -4 4.6 2
 -6 -2 4 3.4 2.6
 -6 -2 4 3.3 3.3
 5 2 -4 429.36 29.7
 -5 -2 4 429.56 30
 4 2 -4 1797.42 122.29
 -4 -2 4 1895.21 122.69
 3 2 -4 1391.36 91.39
 -3 -2 4 1363.06 91.59
 2 2 -4 1013.6 67.09
 -2 -2 4 1012.2 67.29
 -1 -2 4 3302.17 217.48
 0 2 -4 2954 195.08
 0 2 -4 3084.39 195.08
 0 -2 4 2857.31 195.18
 -1 2 -4 3117.39 211.48
 -1 2 -4 3295.77 211.08
 -2 2 -4 1334.87 88.69
 -3 2 -4 987.3 68.19
 3 -2 4 1055.49 67.59
 -4 2 -4 1402.96 92.69
 -4 2 -4 1368.46 93.29
 4 -2 4 1431.36 92.79
 -5 2 -4 30.4 3.7
 -5 2 -4 32.2 3.3
 5 -2 4 29.8 3.3
 -6 2 -4 2.1 1.3
 6 -2 4 3.3 1.7
 -7 2 -4 1.5 1.9
 -7 2 -4 1 1.4
 7 -2 4 1.5 1.8
 -8 2 -4 414.86 28.4
 -8 2 -4 389.36 29
 8 -2 4 423.06 29
 -9 2 -4 179.68 14.4
 -9 2 -4 193.38 14
 9 -2 4 178.68 14.6
 -10 2 -4 54.69 6.3
 -10 2 -4 65.89 6.2
 -11 2 -4 160.08 11.9
 -11 -1 4 53.49 5.4
 -10 -1 4 10.1 2.9
 -9 -1 4 2.7 2.1
 8 1 -4 49.99 6.2
 -8 -1 4 42.3 4.9
 7 1 -4 31.8 4.6
 -7 -1 4 37.1 4.1
 -7 -1 4 38.9 7.4
 -7 -1 4 36.8 5.7
 6 1 -4 3.6 1.9
 -6 -1 4 3.6 3
 -6 -1 4 4.2 2.3
 5 1 -4 4.4 1.7
 -5 -1 4 5.2 2.1
 4 1 -4 2451.05 162.88
 -4 -1 4 2475.85 163.08
 3 1 -4 127.79 9.5
 -3 -1 4 137.99 9.8
 2 1 -4 775.22 52.69
 -2 -1 4 812.02 52.89
 -1 -1 4 586.64 39
 0 1 -4 1714.33 113.69
 0 1 -4 1741.13 113.79
 -1 1 -4 824.12 54.29
 -2 1 -4 1034.2 66.79
 2 -1 4 987.8 66.79
 -3 1 -4 3573.44 235.98
 3 -1 4 3592.34 235.98
 -4 1 -4 410.36 27.9
 4 -1 4 412.16 27.9
 -5 1 -4 53.99 5
 5 -1 4 62.19 5.2
 -6 1 -4 560.34 38.3
 6 -1 4 559.64 38.3
 -7 1 -4 1.7 2
 -7 1 -4 1 1.6
 7 -1 4 5.5 2.3
 -8 1 -4 20.8 3.9
 -8 1 -4 25.3 3.7
 8 -1 4 27.4 4.4
 -9 1 -4 502.05 33.4
 -9 1 -4 437.76 33.8
 9 -1 4 494.75 37.2
 9 -1 4 499.25 35.9
 -10 1 -4 214.58 15.8
 -11 1 -4 49.6 5
 -11 0 4 4.7 2.3
 -10 0 4 23.7 3.7
 -9 0 4 443.66 30.7
 8 0 -4 57.09 6.5
 -8 0 4 50.99 5.3
 -8 0 4 59.59 9
 7 0 -4 16.8 3.3
 -7 0 4 18.2 4.1
 -7 0 4 23.2 3.2
 -7 0 4 21.6 5.5
 6 0 -4 363.26 25
 -6 0 4 343.17 25.1
 -6 0 4 354.86 27.3
 5 0 -4 275.87 19.5
 -5 0 4 278.67 19.7
 4 0 -4 26.6 3
 -4 0 4 21.4 2.9
 3 0 -4 1221.68 80.99
 2 0 -4 1967.6 130.49
 -2 0 4 1987.4 130.49
 1 0 -4 820.02 52.79
 -1 0 4 773.22 52.79
 0 0 -4 132.89 9.7
 0 0 4 146.49 9.7
 -1 0 -4 53.49 3.8
 1 0 4 47.8 3.9
 -2 0 -4 1.2 0.8
 2 0 4 0.7 0.9
 -3 0 -4 4.7 1.2
 -3 0 -4 8.7 1.7
 3 0 4 5.8 1.3
 -4 0 -4 5.8 1.6
 4 0 4 7 1.7
 -5 0 -4 195.98 14.3
 5 0 4 197.48 14.3
 6 0 4 51.79 5.4
 -7 0 -4 24.9 3.5
 -7 0 -4 23.1 4.3
 7 0 4 24.8 4
 -8 0 -4 1.6 2
 8 0 4 2.3 2.3
 8 0 4 0.7 2.6
 -9 0 -4 21.4 3.6
 -10 0 -4 79.39 7.2
 -11 0 -4 -0.8 1.9
 -12 1 4 9.8 2.3
 -11 1 4 22.5 3.5
 -10 1 4 1.9 1.9
 9 -1 -4 105.89 10.2
 -9 1 4 118.59 9.1
 8 -1 -4 23.3 4.2
 -8 1 4 18.7 5.6
 -8 1 4 24.1 3.3
 7 -1 -4 101.69 8.8
 -7 1 4 96.49 7.9
 -7 1 4 99.39 10.8
 -7 1 4 110.89 10.5
 6 -1 -4 2 1.8
 -6 1 4 -0.4 1.7
 -6 1 4 4.7 3
 5 -1 -4 26.9 3.5
 -5 1 4 25.6 3.5
 4 -1 -4 641.94 43.1
 -4 1 4 640.04 43.2
 3 -1 -4 732.73 49.4
 -3 1 4 744.93 49.4
 2 -1 -4 87.69 6.5
 -2 1 4 84.09 6.5
 -2 1 4 85.49 6
 1 -1 -4 3403.16 223.68
 -1 1 4 3389.96 223.68
 0 -1 -4 1405.26 90.29
 0 -1 -4 1350.76 90.19
 0 1 4 1328.07 90.19
 -1 -1 -4 1665.63 106.39
 -1 -1 -4 1547.35 106.29
 1 1 4 1618.94 106.49
 -2 -1 -4 42.6 3.4
 -2 -1 -4 38.9 3.7
 2 1 4 34.6 3.5
 2 1 4 41.9 3.6
 -3 -1 -4 770.12 52.29
 -3 -1 -4 783.62 52.19
 3 1 4 763.72 52.09
 3 1 4 804.72 52.19
 -4 -1 -4 56.29 4.9
 -4 -1 -4 45.8 5
 4 1 4 56.09 5
 5 1 4 64.89 5.9
 5 1 4 60.69 5.9
 -6 -1 -4 264.47 19.8
 6 1 4 294.87 20.6
 6 1 4 285.67 20.5
 -7 -1 -4 159.48 12.5
 7 1 4 170.28 13.5
 7 1 4 162.58 13.3
 -8 -1 -4 30 4.3
 8 1 4 32.4 5.3
 -9 -1 -4 64.49 6.5
 -10 -1 -4 96.79 8.3
 -11 -1 -4 71.79 6
 -12 2 4 42.6 4.5
 -11 2 4 69.39 6.4
 -10 2 4 6.1 2.3
 9 -2 -4 21 4.1
 -9 2 4 21.3 7.2
 -9 2 4 27.9 3.5
 8 -2 -4 35 5.1
 -8 2 4 37.6 7.3
 -8 2 4 43.3 5.6
 -8 2 4 37.2 4.1
 7 -2 -4 80.99 7.4
 -7 2 4 75.59 6.6
 -7 2 4 84.59 9.6
 6 -2 -4 330.17 22.8
 -6 2 4 323.07 22.9
 -6 2 4 312.87 24.9
 5 -2 -4 1375.36 90.49
 -5 2 4 1323.47 90.09
 -5 2 4 1372.06 90.49
 4 -2 -4 42.4 4
 -4 2 4 38 3.5
 3 -2 -4 42.7 3.7
 -3 2 4 33.3 3.1
 -3 2 4 42.8 3.8
 2 -2 -4 206.08 14.2
 -2 2 4 200.08 14.2
 1 -2 -4 2268.57 155.08
 1 -2 -4 2376.46 155.08
 -1 2 4 2408.76 155.18
 0 -2 -4 1087.59 71.59
 0 -2 -4 1054.69 71.69
 0 2 4 1095.99 71.59
 -1 -2 -4 43 3.9
 -1 -2 -4 44.6 3.8
 1 2 4 36.6 3.9
 -2 -2 -4 6.9 1.5
 -2 -2 -4 13.8 2.3
 2 2 4 8.4 1.7
 -3 -2 -4 35.6 4
 -3 -2 -4 33.2 3.5
 3 2 4 32.2 3.7
 -4 -2 -4 8.9 2.5
 4 2 4 8.9 2.2
 5 2 4 16.9 3.2
 -6 -2 -4 1 1.9
 6 2 4 4.3 2.4
 -7 -2 -4 320.97 22.7
 7 2 4 314.07 23.6
 -8 -2 -4 61.09 6.3
 8 2 4 52.99 7.4
 -9 -2 -4 2.3 2.4
 -10 -2 -4 4.2 2.3
 -12 3 4 6.4 2.3
 -11 3 4 152.68 11.6
 -10 3 4 17.7 3
 9 -3 -4 591.74 41.6
 -9 3 4 609.64 40.5
 -9 3 4 566.14 41.3
 -9 3 4 609.04 44.4
 8 -3 -4 126.79 10.7
 -8 3 4 140.19 11.2
 -8 3 4 122.09 12.9
 -8 3 4 121.09 9.8
 7 -3 -4 88.09 7.7
 -7 3 4 85.49 6.8
 -7 3 4 79.39 9.5
 6 -3 -4 466.65 31.8
 -6 3 4 446.56 33.9
 -6 3 4 460.35 32
 5 -3 -4 107.89 8.6
 -5 3 4 107.19 8.5
 -5 3 4 106.29 8.1
 4 -3 -4 10.1 2.1
 -4 3 4 12 2.3
 -4 3 4 8.8 1.6
 3 -3 -4 29.7 3.2
 -3 3 4 31.6 3.3
 2 -3 -4 1536.55 103.79
 -2 3 4 1596.64 103.89
 1 -3 -4 38.1 3.7
 -1 3 4 43.6 4
 0 -3 -4 1914.91 125.59
 0 3 4 1883.01 125.59
 -1 -3 -4 831.72 58.29
 -1 -3 -4 861.71 58.29
 1 3 4 922.91 58.29
 -2 -3 -4 5.7 2
 2 3 4 5.5 1.9
 -3 -3 -4 260.47 18.3
 3 3 4 247.28 18.1
 -4 -3 -4 529.65 37
 4 3 4 541.05 36.9
 -5 -3 -4 696.83 47.1
 -5 -3 -4 639.94 46
 5 3 4 705.53 46.8
 -6 -3 -4 5.1 2.2
 6 3 4 7.7 3.2
 -7 -3 -4 19.8 3.6
 7 3 4 21.9 4.8
 -8 -3 -4 6.3 2.7
 -9 -3 -4 13.6 3.1
 -10 -3 -4 14.7 2.7
 -12 4 4 1.4 1.9
 -11 4 4 120.59 10.6
 -11 4 4 139.99 10.2
 -10 4 4 277.67 19.5
 -10 4 4 269.67 20.5
 9 -4 -4 3.9 2.5
 -9 4 4 1.9 2.6
 -9 4 4 1.8 3.7
 -9 4 4 2.1 1.7
 8 -4 -4 609.94 42.1
 -8 4 4 587.44 44.6
 -8 4 4 617.94 41.1
 7 -4 -4 19.7 3.5
 -7 4 4 16.3 4.7
 -7 4 4 27 3
 6 -4 -4 2118.89 134.09
 -6 4 4 1910.71 135.99
 5 -4 -4 1515.55 97.69
 -5 4 4 1406.46 97.49
 -5 4 4 1472.35 97.19
 4 -4 -4 244.78 17.3
 -4 4 4 243.08 17.3
 3 -4 -4 39 3.9
 -3 4 4 40.1 4
 2 -4 -4 178.98 13.2
 -2 4 4 191.68 13.3
 1 -4 -4 341.77 23
 -1 4 4 327.37 23.1
 0 -4 -4 478.05 33.6
 0 4 4 511.75 33.6
 -1 -4 -4 78.49 7.2
 1 4 4 97.29 7.2
 -2 -4 -4 419.96 28.5
 2 4 4 399.26 28.3
 -3 -4 -4 93.99 8
 3 4 4 88.49 7.9
 -4 -4 -4 68.99 7.1
 4 4 4 75.89 7.3
 -5 -4 -4 2.3 2.7
 -5 -4 -4 0.4 2
 -6 -4 -4 17.6 3.2
 6 4 4 14.5 4.2
 -7 -4 -4 10.1 3
 7 4 4 13.5 4.4
 -8 -4 -4 -1.3 2.3
 -9 -4 -4 28.1 4
 -10 -4 -4 7.7 2.1
 -12 5 4 122.09 9.3
 -11 5 4 36.4 4.1
 -11 5 4 30.1 4.6
 -10 5 4 110.39 8.9
 -10 5 4 104.49 12
 -10 5 4 114.19 10.2
 9 -5 -4 -0.4 2.1
 -9 5 4 0 3.4
 -9 5 4 0.9 1.6
 -9 5 4 1.9 2.7
 8 -5 -4 0 1.9
 -8 5 4 1.4 1.4
 -8 5 4 -0.6 2.8
 7 -5 -4 2.9 2
 -7 5 4 -0.5 1.2
 -7 5 4 1.4 2.8
 6 -5 -4 348.17 24.1
 -6 5 4 329.77 26.3
 5 -5 -4 6.6 2
 4 -5 -4 112.49 8.7
 -4 5 4 107.29 8.6
 3 -5 -4 1049.7 67.39
 -3 5 4 963.8 67.19
 2 -5 -4 928.01 59.69
 -2 5 4 851.61 59.59
 1 -5 -4 2.5 1.6
 -1 5 4 0.2 1.4
 0 -5 -4 405.26 28.5
 0 5 4 419.06 28.3
 -1 -5 -4 287.67 19.9
 1 5 4 266.57 19.5
 -2 -5 -4 10.4 2.7
 2 5 4 8.1 2.3
 -3 -5 -4 36.5 4.8
 3 5 4 29.8 4.4
 -4 -5 -4 304.77 22.2
 -4 -5 -4 299.67 21.3
 4 5 4 298.07 22.2
 -5 -5 -4 53.39 6.9
 -5 -5 -4 58.39 6.2
 5 5 4 62.59 7.2
 -6 -5 -4 140.79 11
 6 5 4 122.69 12.1
 -7 -5 -4 8.8 2.9
 -8 -5 -4 223.18 16.5
 -9 -5 -4 21.8 3.3
 9 5 4 24.2 4
 -12 6 4 0.6 1.6
 -12 6 4 2 2
 -11 6 4 43.3 4.5
 -10 6 4 14 5.4
 -10 6 4 28.5 3.6
 -10 6 4 31.7 5.2
 9 -6 -4 9.9 3.1
 -9 6 4 6.5 4.1
 -9 6 4 15.6 4.1
 -9 6 4 9.4 2.3
 8 -6 -4 33.2 4.9
 -8 6 4 27.3 3.5
 -8 6 4 29.3 6.6
 7 -6 -4 574.94 39.4
 -7 6 4 575.94 42.2
 -7 6 4 546.25 38.4
 6 -6 -4 147.69 11.8
 -6 6 4 150.08 14.1
 5 -6 -4 29.2 4
 -5 6 4 33.1 6.1
 4 -6 -4 146.29 11.2
 3 -6 -4 1752.62 116.49
 2 -6 -4 6.7 2.1
 -2 6 4 4.4 1.8
 1 -6 -4 25.2 3.6
 -1 6 4 28.5 3.5
 0 -6 -4 14.2 2.9
 0 6 4 11.7 2.3
 -1 -6 -4 11.1 2.8
 1 6 4 6.5 2
 -2 -6 -4 0.9 2.1
 2 6 4 1.9 1.9
 -3 -6 -4 203.98 15.1
 3 6 4 181.58 14.7
 -4 -6 -4 431.96 28.6
 -4 -6 -4 392.66 29.3
 4 6 4 398.36 29.3
 -5 -6 -4 96.79 10.9
 -5 -6 -4 82.39 8
 5 6 4 81.19 8.9
 -6 -6 -4 77.29 7.5
 -7 -6 -4 140.59 11.5
 7 6 4 143.89 12.1
 -8 -6 -4 4.4 2.3
 8 6 4 7.8 2.8
 -12 7 4 12.3 2.1
 -12 7 4 9.8 2.7
 -11 7 4 15.3 3.8
 -11 7 4 18.1 2.6
 -10 7 4 9.5 4.4
 -10 7 4 8.7 2.2
 -10 7 4 9 3.6
 9 -7 -4 3.5 2.6
 -9 7 4 6.5 3.7
 -9 7 4 4.9 2
 -9 7 4 1.6 3.7
 8 -7 -4 73.89 7.4
 -8 7 4 85.39 6.4
 -8 7 4 53.49 9.3
 7 -7 -4 20.7 3.7
 -7 7 4 13.9 5.3
 -7 7 4 21.4 2.8
 6 -7 -4 3.8 2.2
 -6 7 4 4.4 3.7
 5 -7 -4 51.29 5.5
 -5 7 4 53.09 7.8
 4 -7 -4 443.46 30.4
 -4 7 4 424.76 32.6
 3 -7 -4 234.38 16.4
 -3 7 4 201.28 22.2
 2 -7 -4 419.76 29.4
 1 -7 -4 42.5 5.1
 0 -7 -4 115.49 9.3
 0 7 4 94.29 9.1
 -1 -7 -4 48.3 5.7
 1 7 4 44.4 5
 -2 -7 -4 2.4 2.5
 2 7 4 12.2 3.8
 2 7 4 4.5 2.4
 2 7 4 4.5 2.5
 2 7 4 6.2 1.8
 -3 -7 -4 28.7 4.9
 3 7 4 34.3 4.8
 3 7 4 32 3.7
 3 7 4 26 4.9
 -4 -7 -4 94.19 8.1
 -4 -7 -4 73.19 8.6
 4 7 4 81.79 8.1
 -5 -7 -4 1.5 2.6
 5 7 4 0.9 2.7
 -6 -7 -4 31.4 4.7
 6 7 4 35 5.2
 -7 -7 -4 0.7 2.3
 7 7 4 -2.4 2.3
 -8 -7 -4 22.5 3.5
 8 7 4 27.8 3.9
 -12 8 4 26.4 4
 -11 8 4 59.69 5.1
 -11 8 4 60.29 11.4
 -11 8 4 65.79 7.2
 -10 8 4 69.79 8
 -10 8 4 63.69 9.5
 -10 8 4 68.99 5.9
 -9 8 4 0.9 3.5
 -9 8 4 8.3 3.9
 -9 8 4 7.7 2.1
 8 -8 -4 31.2 4.8
 -8 8 4 20.1 6.3
 7 -8 -4 14.5 3.4
 -7 8 4 28.6 6.7
 -7 8 4 1.9 3.8
 6 -8 -4 35.2 4.9
 -6 8 4 33.9 6.6
 -6 8 4 34.1 7
 5 -8 -4 25.7 4.1
 -5 8 4 24.2 6
 -5 8 4 27.2 6.2
 4 -8 -4 6.1 2.4
 -4 8 4 4.1 3.6
 3 -8 -4 144.79 12
 -3 8 4 153.58 14.6
 2 -8 -4 655.03 44
 -2 8 4 619.54 46.3
 1 -8 -4 183.68 15.4
 -1 8 4 220.58 18
 0 -8 -4 663.43 43.3
 0 8 4 619.54 41.9
 0 8 4 598.34 44.9
 0 8 4 605.84 42.5
 -1 -8 -4 113.59 9.4
 1 8 4 104.59 8.7
 1 8 4 83.19 9.7
 1 8 4 93.69 7.8
 -2 -8 -4 18.4 4
 2 8 4 4.3 3.7
 2 8 4 8.7 2.3
 2 8 4 14.4 3.2
 -3 -8 -4 20.6 4.5
 3 8 4 31.9 3.7
 3 8 4 35.7 5.8
 3 8 4 21.7 4.1
 -4 -8 -4 74.49 9
 4 8 4 96.99 8.8
 -5 -8 -4 67.09 7.2
 5 8 4 65.29 7.3
 -6 -8 -4 4.8 2.5
 6 8 4 1.3 2.4
 -7 -8 -4 8 2.6
 7 8 4 9.9 2.8
 -12 9 4 -1.2 1.8
 -11 9 4 4.9 4
 -11 9 4 6.7 3
 -10 9 4 21.3 6.4
 -10 9 4 23 4.8
 -10 9 4 19.4 2.7
 -9 9 4 132.89 10.3
 -9 9 4 139.19 14.9
 -9 9 4 136.99 12.6
 8 -9 -4 73.79 7.8
 -8 9 4 67.99 10.5
 -8 9 4 75.69 6.4
 7 -9 -4 18.8 4
 -7 9 4 23.5 6.9
 -7 9 4 16.7 2.9
 -7 9 4 23.5 5.7
 6 -9 -4 115.09 9.9
 -6 9 4 86.29 11
 -6 9 4 125.69 13.4
 5 -9 -4 362.66 26.1
 -5 9 4 340.87 29.3
 -5 9 4 403.86 28.3
 -5 9 4 334.07 27.4
 -4 9 4 32.9 6.7
 -4 9 4 40.5 6.9
 -4 9 4 50.69 4.9
 3 -9 -4 37.3 5.7
 -3 9 4 60.89 5.2
 -3 9 4 51.39 7.7
 -3 9 4 57.09 7.7
 2 -9 -4 167.98 12.9
 -2 9 4 174.98 15.5
 -2 9 4 148.59 11.5
 -2 9 4 141.39 13.8
 -2 9 4 141.69 14
 1 -9 -4 227.08 17.4
 -1 9 4 222.38 16.1
 -1 9 4 213.38 18.3
 -1 9 4 240.38 19
 0 -9 -4 53.59 6.9
 0 9 4 58.59 6.4
 0 9 4 63.19 8.3
 0 9 4 74.79 5.8
 -1 -9 -4 160.68 13.6
 1 9 4 165.38 13
 1 9 4 170.98 12.2
 1 9 4 151.18 14.2
 -2 -9 -4 1.1 2.9
 2 9 4 5.8 1.9
 2 9 4 1 3.7
 2 9 4 1 2.4
 -3 -9 -4 154.48 14.3
 3 9 4 173.48 15.1
 3 9 4 179.38 13
 3 9 4 178.88 14
 4 9 4 60.19 6.9
 5 9 4 61.49 6.7
 -6 -9 -4 67.29 6.6
 6 9 4 67.19 6.7
 -11 10 4 13.7 5
 -11 10 4 28.2 4.2
 -10 10 4 62.89 6.8
 -10 10 4 49.6 5
 -9 10 4 1.3 2.8
 -9 10 4 0.8 1.4
 -9 10 4 2.8 4.1
 -8 10 4 416.06 28.5
 -8 10 4 398.56 33.9
 -8 10 4 431.16 32
 7 -10 -4 149.79 13
 -7 10 4 142.59 11.4
 -7 10 4 144.89 14.6
 -7 10 4 172.68 17.2
 6 -10 -4 38.3 5.6
 -6 10 4 34 6.8
 -6 10 4 54.79 9.6
 5 -10 -4 220.28 19
 -5 10 4 276.37 18.3
 -5 10 4 300.97 21.7
 -5 10 4 237.08 20.8
 -5 10 4 223.78 22.4
 4 -10 -4 129.49 13.8
 -4 10 4 174.38 16.3
 -4 10 4 206.48 16.7
 -4 10 4 210.58 13.7
 3 -10 -4 11.3 3.5
 -3 10 4 1.2 3.4
 -3 10 4 19.4 5.9
 -3 10 4 5.9 2.2
 -3 10 4 2.4 3.8
 2 -10 -4 217.58 15.8
 -2 10 4 187.18 17
 -2 10 4 185.88 16.8
 -2 10 4 191.98 14.4
 1 -10 -4 335.37 28.6
 -1 10 4 417.66 30.3
 -1 10 4 390.36 27.8
 -1 10 4 461.05 30.9
 0 -10 -4 0.8 2.6
 0 10 4 0.4 2.3
 0 10 4 -0.2 3.6
 0 10 4 0.4 1.8
 -1 -10 -4 1.6 2.8
 1 10 4 1.8 2.6
 1 10 4 1.5 3.8
 1 10 4 3.1 1.9
 2 10 4 1.4 3.8
 2 10 4 -0.9 1.8
 2 10 4 0 2.4
 3 10 4 12.2 3.5
 3 10 4 5.8 2.3
 3 10 4 8.7 4.3
 4 10 4 4.6 2.8
 5 10 4 35 4.7
 -11 11 4 4.6 2.3
 -10 11 4 1.8 2.4
 -10 11 4 4.8 4.2
 -9 11 4 229.18 18.3
 -9 11 4 252.17 22.1
 -8 11 4 28.8 6.1
 -8 11 4 19.8 6.6
 -8 11 4 24.6 4.7
 -8 11 4 22 2.7
 -7 11 4 70.49 11.4
 -7 11 4 77.39 6.3
 -7 11 4 67.49 9.3
 6 -11 -4 24.6 4.8
 -6 11 4 21.4 7.2
 -6 11 4 42.6 7.3
 5 -11 -4 60.39 7.1
 -5 11 4 44.5 8.2
 -5 11 4 47.3 8.4
 -5 11 4 66.39 10.1
 -5 11 4 54.89 5.9
 4 -11 -4 -0.2 2.5
 -4 11 4 2.4 2
 -4 11 4 5 4.7
 -4 11 4 9.2 4.4
 -4 11 4 -0.5 4
 3 -11 -4 68.59 7.3
 -3 11 4 62.09 6.1
 -3 11 4 60.49 9
 -3 11 4 53.29 8.6
 2 -11 -4 -0.6 2.5
 -2 11 4 0.7 2
 -2 11 4 -1.1 3.6
 -2 11 4 2.9 4.1
 1 -11 -4 11 3.6
 -1 11 4 9.7 2.5
 -1 11 4 14.5 5.2
 0 -11 -4 115.49 10.8
 0 11 4 113.49 9.4
 0 11 4 106.59 12.1
 0 11 4 118.89 10.2
 1 11 4 0.1 2.6
 1 11 4 0.7 4.3
 1 11 4 2.6 1.9
 2 11 4 3.3 2.2
 2 11 4 6.2 2.9
 2 11 4 4.5 4.2
 3 11 4 0.6 2.6
 3 11 4 -0.2 1.9
 3 11 4 2.2 4
 4 11 4 2.3 2.3
 -11 12 4 1.2 1.8
 -10 12 4 14.7 4.7
 -10 12 4 9.7 2.7
 -9 12 4 125.39 13.4
 -9 12 4 120.69 10.3
 -9 12 4 125.39 11.8
 -8 12 4 29.2 7.5
 -8 12 4 35.4 6.6
 -8 12 4 36.8 5.1
 -7 12 4 240.58 20.8
 -7 12 4 251.97 17.3
 -7 12 4 251.37 22.8
 -6 12 4 182.68 15.1
 -6 12 4 245.98 20.9
 -6 12 4 187.88 18
 -5 12 4 57.59 9
 -5 12 4 54.49 9
 -5 12 4 55.49 5.9
 -5 12 4 60.59 10.6
 -4 12 4 110.69 12.4
 -4 12 4 111.19 9
 -4 12 4 96.99 12.6
 -3 12 4 10.8 2.8
 -3 12 4 9 5.3
 -3 12 4 15.7 5.2
 -2 12 4 190.48 14.6
 -2 12 4 185.08 17.3
 -2 12 4 208.48 17.8
 -1 12 4 1.6 2
 -1 12 4 2.2 4.7
 0 12 4 65.89 9
 0 12 4 55.39 5.9
 1 12 4 1.6 2
 1 12 4 4.1 4.4
 1 12 4 0.6 2.6
 2 12 4 70.49 6.6
 2 12 4 73.69 9
 2 12 4 80.29 7.5
 3 12 4 73.79 6.9
 3 12 4 70.99 8.3
 -10 13 4 47.9 4.7
 -9 13 4 1.6 3.1
 -9 13 4 0.1 2.5
 -9 13 4 2 3.6
 -8 13 4 29.7 6.1
 -8 13 4 34.4 7.5
 -7 13 4 37.2 8.3
 -7 13 4 34.1 6.4
 -6 13 4 0.8 1.8
 -6 13 4 2.6 2.4
 -6 13 4 -1.2 4.6
 -6 13 4 2.6 3.8
 -5 13 4 0.8 2.1
 -5 13 4 2.7 4
 -4 13 4 69.99 9.7
 -4 13 4 54.29 5.8
 -4 13 4 57.99 8.8
 -3 13 4 51.39 8.7
 -3 13 4 51.39 5.2
 -3 13 4 41.9 7.5
 -2 13 4 -1.6 4.6
 -2 13 4 3.3 4.2
 -2 13 4 -0.1 2
 -1 13 4 6.8 5.3
 -1 13 4 8.5 2.7
 0 13 4 13.9 5.2
 0 13 4 10.6 2.7
 1 13 4 7.5 2.2
 1 13 4 3.4 4.3
 2 13 4 -0.7 3.4
 2 13 4 1.2 1.7
 -9 14 4 31.8 5
 -8 14 4 0.4 2.8
 -7 14 4 70.39 8.7
 -6 14 4 13 2.7
 -6 14 4 9.1 4.5
 -5 14 4 61.29 6.1
 -5 14 4 68.59 8.9
 -4 14 4 48.4 5.2
 -4 14 4 62.49 8.6
 -4 14 4 37.9 7.2
 -3 14 4 64.39 8.8
 -3 14 4 63.79 5.9
 -3 14 4 52.99 8.3
 -2 14 4 92.09 10.2
 -2 14 4 65.19 6.6
 -1 14 4 32.6 6.2
 -1 14 4 28.4 3.8
 0 14 4 4.4 2
 0 14 4 8.6 4.1
 1 14 4 15.4 4.2
 1 14 4 15.1 2.4
 -8 15 4 25.9 4.4
 -7 15 4 7.1 3.3
 -6 15 4 12.6 2.4
 -6 15 4 9.7 3.9
 -5 15 4 1.6 1.7
 -5 15 4 -0.9 3
 -4 15 4 26.1 3.4
 -4 15 4 29.5 5.4
 -3 15 4 3.2 5.5
 -3 15 4 1.5 1.8
 -2 15 4 4.3 3.5
 -2 15 4 4.7 2
 -1 15 4 18 4.2
 -1 15 4 18 2.7
 -3 16 -5 -1.6 1.5
 -4 16 -5 4.3 1.7
 -4 16 -5 6 3.4
 -5 16 -5 2.3 1.7
 -5 16 -5 -0.1 3
 -6 16 -5 49.7 6.4
 -6 16 -5 49.8 4.7
 0 15 -5 10.9 3.5
 0 15 -5 15.8 3.5
 -1 15 -5 14.3 4.1
 -1 15 -5 13.8 2.5
 -1 15 -5 12.8 3.6
 -2 15 -5 13.1 2.5
 -2 15 -5 7.5 3.9
 -2 15 -5 6.3 3.2
 -3 15 -5 8.3 4.3
 -3 15 -5 8.1 2.5
 -3 15 -5 11.1 3.6
 -4 15 -5 0.6 3.3
 -4 15 -5 -0.1 2.8
 -4 15 -5 0.2 1.8
 -5 15 -5 32.5 4
 -5 15 -5 34.3 6.2
 -6 15 -5 11.4 2.5
 -6 15 -5 8.5 4.1
 -7 15 -5 18 2.9
 -7 15 -5 17.4 4.6
 -8 15 -5 1.6 1.9
 -8 15 -5 1.1 1.7
 -8 15 -5 -0.2 2.7
 2 14 -5 9 4.2
 2 14 -5 9.4 3
 1 14 -5 1.4 2.5
 1 14 -5 -0.2 3.1
 0 14 -5 -0.1 3.3
 0 14 -5 0 2.6
 -1 14 -5 0.3 1.9
 -1 14 -5 0.6 3.5
 -1 14 -5 -1.5 2.6
 -2 14 -5 18.9 3.4
 -2 14 -5 13.1 5.2
 -2 14 -5 20.5 4.6
 -2 14 -5 18.5 5
 -3 14 -5 79.89 8.4
 -3 14 -5 61.89 6.5
 -3 14 -5 56.19 9.1
 -3 14 -5 73.49 8.9
 -4 14 -5 0.4 3.3
 -4 14 -5 -1.5 2.1
 -4 14 -5 0.4 4
 -5 14 -5 2.6 3.2
 -5 14 -5 8.7 2.7
 -5 14 -5 8.4 4.8
 -6 14 -5 4.7 2.4
 -6 14 -5 1.3 3.8
 -6 14 -5 -1.5 2.4
 -7 14 -5 5.8 2.5
 -7 14 -5 6 4.3
 -7 14 -5 8.7 2.5
 -8 14 -5 -1.5 1.9
 -8 14 -5 0 3.1
 -8 14 -5 3.3 2.2
 -9 14 -5 1.5 3.2
 -9 14 -5 2.9 2
 3 13 -5 15.8 3.7
 3 13 -5 19.9 3.7
 2 13 -5 6.3 3.3
 2 13 -5 0.5 3.1
 1 13 -5 3.2 3.1
 1 13 -5 1.3 3.5
 0 13 -5 12.8 2.7
 0 13 -5 12.3 4.4
 0 13 -5 10.8 3.9
 -1 13 -5 0.1 3
 -1 13 -5 6.5 4
 -1 13 -5 5.7 2.4
 -2 13 -5 188.68 16
 -2 13 -5 165.18 14.2
 -2 13 -5 160.78 12.9
 -2 13 -5 151.08 14.3
 -3 13 -5 23.2 6.2
 -3 13 -5 29.6 5.9
 -3 13 -5 29.9 4.3
 -3 13 -5 41.2 6.4
 -4 13 -5 151.78 12.4
 -4 13 -5 162.18 14.2
 -4 13 -5 151.08 15
 -5 13 -5 23.6 4.1
 -5 13 -5 17.4 5.6
 -5 13 -5 23.4 4
 -5 13 -5 22.9 5.2
 -6 13 -5 23.6 6.4
 -6 13 -5 22.6 3.8
 -6 13 -5 23.1 4
 -7 13 -5 43.7 5.4
 -7 13 -5 44.5 7.9
 -7 13 -5 46.2 5.6
 -8 13 -5 62.59 6.6
 -8 13 -5 59.59 6.3
 -8 13 -5 65.99 9
 -9 13 -5 -2.7 1.8
 -9 13 -5 -1.9 3.3
 -10 13 -5 7.6 2.3
 4 12 -5 4.5 2.7
 4 12 -5 2.1 2.8
 3 12 -5 13.4 3.6
 3 12 -5 13.2 4.1
 2 12 -5 3.1 3.8
 2 12 -5 3.7 3.1
 1 12 -5 26.3 5.4
 1 12 -5 27.5 5.2
 0 12 -5 60.89 7.7
 0 12 -5 47.2 6.8
 -1 12 -5 44.1 6.5
 -1 12 -5 28.8 4.3
 -1 12 -5 29.9 5.5
 -2 12 -5 7.4 3.7
 -2 12 -5 4.8 2.4
 -2 12 -5 5.2 4.3
 -2 12 -5 5.1 3.6
 -3 12 -5 64.99 8.7
 -3 12 -5 67.29 6.9
 -3 12 -5 84.09 9
 -3 12 -5 58.39 9.1
 -4 12 -5 1.1 2.5
 -4 12 -5 -3.6 2.7
 -4 12 -5 1 3.9
 -4 12 -5 1.3 3.5
 -5 12 -5 37.2 5.3
 -5 12 -5 34.7 5
 -5 12 -5 44.5 7.9
 -5 12 -5 33 6.3
 -6 12 -5 33.2 7.1
 -6 12 -5 28.2 4.4
 -6 12 -5 31 4.7
 -7 12 -5 266.17 22.5
 -7 12 -5 239.78 19.2
 -7 12 -5 279.27 19.7
 -8 12 -5 17 3.8
 -8 12 -5 18.4 5.9
 -8 12 -5 12.5 3.3
 -9 12 -5 0.9 2.4
 -10 12 -5 2.1 2
 -10 12 -5 2.1 2.4
 -11 12 -5 41.3 4.7
 -11 12 -5 39.6 4.4
 5 11 -5 9.6 3.2
 5 11 -5 15.9 3.4
 4 11 -5 169.98 14.2
 4 11 -5 184.88 14.6
 3 11 -5 29.7 5.5
 3 11 -5 33 5.6
 2 11 -5 10 4.3
 2 11 -5 20 4.4
 1 11 -5 5.9 3.8
 1 11 -5 8.3 3.3
 1 11 -5 4.2 2.7
 -1 -11 5 9.2 3.7
 0 11 -5 71.39 8.3
 0 11 -5 84.09 7.8
 0 11 -5 86.69 8.8
 0 11 -5 88.79 7.4
 0 -11 5 69.19 8
 -1 11 -5 13.3 4
 -1 11 -5 11.8 3.7
 -1 11 -5 20 3.3
 -1 11 -5 13.5 5.2
 1 -11 5 13.4 3.4
 -2 11 -5 30.4 6.4
 -2 11 -5 32.9 4.6
 -2 11 -5 34.8 5.7
 -2 11 -5 28.9 5.3
 -3 11 -5 130.09 12.5
 -3 11 -5 124.29 9.8
 -3 11 -5 87.59 10.5
 -4 11 -5 124.19 12.9
 -4 11 -5 126.29 10.1
 -4 11 -5 102.89 11.3
 -4 11 -5 110.19 9.9
 -5 11 -5 2.3 4.2
 -5 11 -5 0.8 2.5
 -5 11 -5 2.3 2.5
 -5 11 -5 4 3.6
 -6 11 -5 44.6 5.5
 -6 11 -5 42.6 8.1
 -6 11 -5 42.1 5.5
 -7 11 -5 9.1 5
 -7 11 -5 12.4 3.3
 -7 11 -5 6.8 3.1
 -8 11 -5 29.8 4.7
 -8 11 -5 35.5 5.1
 -8 11 -5 28.7 6.9
 -8 11 -5 36.1 4.8
 -9 11 -5 24.9 4.4
 -9 11 -5 26.6 4.4
 -10 11 -5 6.3 2.7
 -10 11 -5 6.3 2.6
 -11 11 -5 8.2 2.5
 -11 11 -5 7.9 2.4
 6 10 -5 8.1 2.9
 6 10 -5 3.4 2.7
 5 10 -5 0.8 2.6
 5 10 -5 -1 2.7
 4 10 -5 11.9 3.5
 4 10 -5 8.6 3.9
 3 10 -5 -0.3 3.2
 3 10 -5 2.5 2.7
 2 10 -5 7.1 3.6
 2 10 -5 -2.6 2.2
 2 10 -5 0.6 3
 -2 -10 5 9.1 3.7
 1 10 -5 4.5 2.8
 1 10 -5 3 2.5
 1 10 -5 5.4 3.4
 -1 -10 5 6.4 3.1
 0 10 -5 116.89 9.9
 0 10 -5 111.19 10.6
 0 10 -5 114.29 10.3
 0 10 -5 122.39 9.5
 0 -10 5 113.89 10
 -1 10 -5 289.17 19.9
 -1 10 -5 288.47 22.3
 -1 10 -5 253.37 20.5
 -1 10 -5 277.37 20.8
 1 -10 5 269.07 19.9
 -2 10 -5 35.2 4.5
 -2 10 -5 30 6.3
 -2 10 -5 26.4 4.9
 -2 10 -5 37.8 5.8
 -2 10 -5 30.7 5.6
 -3 10 -5 0.8 3.5
 -3 10 -5 5.5 3.2
 -3 10 -5 2 2.4
 -3 10 -5 8.7 3.7
 -3 10 -5 0.7 2.1
 -4 10 -5 61.79 7.5
 -4 10 -5 61.09 8.2
 -4 10 -5 51.79 6
 -4 10 -5 47.7 5.9
 -4 10 -5 53.59 8.5
 -5 10 -5 53.99 6
 -5 10 -5 46.7 5
 -5 10 -5 47.1 8
 -5 10 -5 51.19 6
 -5 10 -5 52.89 7.3
 -5 10 -5 59.69 8.9
 -6 10 -5 19.7 6.1
 -6 10 -5 21.5 3.7
 -7 10 -5 614.94 46.9
 -7 10 -5 714.23 44
 -7 10 -5 531.95 47.3
 -7 10 -5 693.13 44.3
 -8 10 -5 27.8 4.2
 -8 10 -5 21.6 4.4
 -9 10 -5 24.8 4.5
 -9 10 -5 22.5 4.4
 -10 10 -5 12.5 3.6
 -10 10 -5 12.6 3.2
 -11 10 -5 0.7 2.4
 -11 10 -5 1.2 2.3
 6 9 -5 0.1 2.8
 6 9 -5 -1.1 2.4
 5 9 -5 23.7 5.1
 5 9 -5 43.4 5.6
 4 9 -5 156.68 13
 4 9 -5 152.58 13.5
 3 9 -5 1.6 2.4
 3 9 -5 -0.9 2.8
 3 9 -5 3.3 2.6
 -3 -9 5 1.8 3
 2 9 -5 11.6 3.4
 2 9 -5 16.4 3.5
 2 9 -5 12.7 3.7
 -2 -9 5 16.1 4.1
 1 9 -5 11.5 3.1
 1 9 -5 14.4 3.2
 1 9 -5 17.4 3.8
 -1 -9 5 12.8 3.4
 0 9 -5 82.79 8
 0 9 -5 96.19 7.3
 0 9 -5 75.79 7.8
 0 9 -5 86.19 7.5
 0 -9 5 74.69 7.4
 -1 9 -5 1.2 1.9
 -1 9 -5 3.9 2.5
 1 -9 5 5 2.1
 -2 9 -5 116.59 10.9
 -2 9 -5 145.79 11.9
 -2 9 -5 110.89 11.5
 -3 9 -5 12.3 3
 -3 9 -5 16.5 4.3
 -3 9 -5 9.7 3.4
 -3 9 -5 15.1 5.6
 -4 9 -5 131.69 12.2
 -4 9 -5 134.09 10.3
 -4 9 -5 124.89 11.3
 -4 9 -5 141.99 12.9
 -4 9 -5 115.09 9.3
 -4 9 -5 127.39 10.2
 -4 9 -5 109.39 13.5
 -5 9 -5 179.28 15.8
 -5 9 -5 162.48 15.1
 -5 9 -5 166.88 14
 -5 9 -5 202.08 13.2
 -5 9 -5 140.59 15.8
 -5 9 -5 160.58 12.2
 -5 9 -5 159.18 16.4
 -6 9 -5 17.7 5.2
 -6 9 -5 34.1 9.6
 -6 9 -5 10.1 2.8
 -6 9 -5 14.3 2.7
 -6 9 -5 3.9 4.3
 -6 9 -5 21.3 6.1
 -7 9 -5 748.93 56.99
 -7 9 -5 831.12 54.99
 -7 9 -5 773.22 57.29
 -7 9 -5 837.32 54.29
 -8 9 -5 29.3 5
 -9 9 -5 10.9 3.6
 -10 9 -5 61.19 6.7
 -10 9 -5 53.39 7
 -11 9 -5 45.2 5.4
 -11 9 -5 44.5 5.8
 -12 9 -5 11.8 2.9
 7 8 -5 1.2 2.4
 7 8 -5 3.3 2.8
 6 8 -5 27.4 4.7
 6 8 -5 23.6 4.3
 5 8 -5 13.1 3.8
 5 8 -5 10.2 3.2
 4 8 -5 92.79 8.9
 4 8 -5 100.99 9.8
 4 8 -5 89.19 8.9
 -4 -8 5 91.79 9.5
 3 8 -5 33.9 5.5
 3 8 -5 31.3 4.8
 3 8 -5 32.1 4.8
 -3 -8 5 33.4 5.3
 2 8 -5 1.3 2.1
 2 8 -5 0.3 2.4
 2 8 -5 1.1 2
 -2 -8 5 2.6 2.5
 1 8 -5 157.08 12.2
 1 8 -5 139.29 12.4
 -1 -8 5 162.38 12.2
 0 8 -5 100.69 8.6
 0 -8 5 95.29 8.1
 -1 8 -5 65.89 6.5
 -1 8 -5 56.49 6.7
 1 -8 5 61.89 5.5
 -2 8 -5 6.2 3
 -2 8 -5 6.9 4.1
 -3 8 -5 243.28 17.9
 -3 8 -5 236.28 18.5
 -3 8 -5 215.48 19.8
 -4 8 -5 1.2 2.7
 -4 8 -5 2.3 3.3
 -4 8 -5 0.8 2.4
 -4 8 -5 0.9 3.5
 -5 8 -5 23.9 3.5
 -5 8 -5 43.5 7.1
 -5 8 -5 41 6.6
 -5 8 -5 30.7 5
 -6 8 -5 9.7 2.5
 -6 8 -5 13.4 4.5
 -6 8 -5 5.2 2.7
 -6 8 -5 6.8 4.3
 -6 8 -5 10.4 2.6
 -7 8 -5 232.78 20.8
 -7 8 -5 259.97 19.1
 -7 8 -5 252.27 18
 -8 8 -5 62.49 7.4
 -9 8 -5 156.98 13.6
 -10 8 -5 94.29 9.4
 -10 8 -5 89.59 8.8
 -11 8 -5 7.5 3.2
 -12 8 -5 62.49 6.2
 8 7 -5 2.7 2.4
 7 7 -5 13.4 3.5
 7 7 -5 10.6 3.4
 6 7 -5 3.9 2.7
 6 7 -5 0.3 2.9
 5 7 -5 70.79 7.2
 5 7 -5 62.89 7.9
 -5 -7 5 63.29 8
 4 7 -5 13.4 3.2
 4 7 -5 6.2 2.7
 4 7 -5 10.2 3.6
 -4 -7 5 12.5 3.8
 3 7 -5 10.1 2.9
 3 7 -5 9.1 2.7
 3 7 -5 11.3 3.3
 -3 -7 5 8.2 3.3
 2 7 -5 0.8 1.8
 -2 -7 5 0.1 2.2
 -1 -7 5 1023.1 68.89
 0 7 -5 347.87 26.5
 0 -7 5 403.36 26
 -1 7 -5 2 2.1
 1 -7 5 2.2 1.3
 -2 7 -5 438.06 31.1
 -2 7 -5 429.16 29.2
 -3 7 -5 55.69 6.9
 -3 7 -5 61.79 4.7
 -4 7 -5 216.28 14.6
 -4 7 -5 207.38 17.2
 -5 7 -5 169.98 16.4
 -5 7 -5 216.58 16.7
 -5 7 -5 200.18 17.4
 -5 7 -5 203.18 14.6
 -6 7 -5 678.73 48.6
 -6 7 -5 765.02 51.39
 -7 7 -5 66.59 7.2
 -8 7 -5 26.3 4.9
 -8 7 -5 24 3.8
 -9 7 -5 2.8 2.9
 -10 7 -5 58.09 7
 -10 7 -5 71.09 7.8
 -11 7 -5 34.2 5.1
 -12 7 -5 39.2 4.9
 8 6 -5 4.4 2.6
 7 6 -5 24.4 4.6
 7 6 -5 22.7 4.2
 6 6 -5 173.68 13.6
 6 6 -5 154.98 14
 -6 -6 5 179.48 14.6
 5 6 -5 65.09 6.8
 -5 -6 5 60.69 7.8
 4 6 -5 3.3 2.3
 4 6 -5 4.4 2.7
 4 6 -5 4 2.3
 -4 -6 5 4.8 3.1
 3 6 -5 28.8 4
 -3 -6 5 36.8 5.1
 -2 -6 5 66.89 6.6
 -1 -6 5 49.2 4.9
 0 6 -5 24.8 3.7
 0 -6 5 23.2 2.9
 -1 6 -5 0.3 1.8
 -1 6 -5 1.5 0.9
 1 -6 5 2.4 1.3
 -2 6 -5 1265.97 85.39
 -3 6 -5 956.5 65.29
 -4 6 -5 859.01 58.49
 -4 6 -5 880.51 59.89
 -5 6 -5 109.19 9.8
 -5 6 -5 93.09 8.2
 -6 6 -5 14.7 3.8
 -7 6 -5 37.3 6.1
 -7 6 -5 38.1 5.5
 7 -6 5 32.3 4.7
 -8 6 -5 8.7 3.2
 -8 6 -5 7.1 2.5
 8 -6 5 8.5 2.5
 -9 6 -5 14 4
 9 -6 5 12.9 3.2
 -10 6 -5 27.1 5
 -11 6 -5 34.3 5.1
 -12 6 -5 49.8 5.3
 -9 -5 5 102.59 11.1
 8 5 -5 45.2 5.6
 7 5 -5 70.19 8
 7 5 -5 77.19 7.6
 6 5 -5 41.7 6.1
 6 5 -5 45.4 5.5
 -6 -5 5 47.2 6.7
 5 5 -5 0 2.2
 5 5 -5 2.1 2.4
 5 5 -5 -1.5 1.9
 -5 -5 5 0.9 2.8
 4 5 -5 170.68 13.5
 -4 -5 5 192.28 14.5
 -3 -5 5 16.1 3.3
 -2 -5 5 812.22 54.69
 -1 -5 5 79.49 6.4
 0 5 -5 156.48 11.6
 0 5 -5 131.79 10.5
 0 -5 5 168.98 10.8
 -1 5 -5 37.3 4.4
 -1 5 -5 38.3 2.9
 1 -5 5 34.7 3
 -2 5 -5 506.75 35.2
 -3 5 -5 295.97 21.2
 -3 5 -5 283.57 20.1
 -4 5 -5 8.4 2.7
 -4 5 -5 6.1 1.9
 -5 5 -5 149.99 11.4
 -5 5 -5 164.28 12.5
 5 -5 5 137.19 10.6
 -6 5 -5 405.96 29.2
 -6 5 -5 432.76 30.2
 6 -5 5 409.16 28.4
 -7 5 -5 435.86 32.8
 -7 5 -5 423.56 29.4
 -7 5 -5 394.16 28.4
 7 -5 5 397.56 28.4
 -8 5 -5 513.95 35.8
 -8 5 -5 493.05 35
 8 -5 5 504.65 34.9
 -9 5 -5 33.9 5.3
 9 -5 5 38.2 5.1
 -10 5 -5 1.9 2.6
 -11 5 -5 54.69 6.3
 -12 5 -5 8.4 2.4
 -10 -4 5 13.4 2.7
 -9 -4 5 9.2 3.1
 8 4 -5 5.7 2.8
 -8 -4 5 3.8 2.8
 7 4 -5 93.99 8.4
 7 4 -5 101.19 9
 -7 -4 5 64.99 11
 -7 -4 5 88.09 9.5
 6 4 -5 31.3 4.9
 -6 -4 5 27.2 5.2
 5 4 -5 50.29 6.1
 5 4 -5 54.39 5.6
 -5 -4 5 52.39 6.5
 -4 -4 5 9.2 2.7
 -3 -4 5 5.7 2.1
 -2 -4 5 20.2 2.8
 -1 -4 5 11 1.9
 0 4 -5 280.87 19
 0 4 -5 251.07 18.1
 0 -4 5 275.97 18.2
 -1 4 -5 116.19 8.6
 1 -4 5 99.99 7.3
 -2 4 -5 159.08 11.5
 -2 4 -5 164.98 12.3
 -3 4 -5 483.85 33.6
 -3 4 -5 486.75 32.9
 -4 4 -5 103.79 7.9
 -4 4 -5 102.19 8.5
 4 -4 5 93.99 7.1
 -5 4 -5 548.05 38
 -5 4 -5 552.34 37.4
 5 -4 5 539.75 36.7
 -6 4 -5 223.88 17.3
 -6 4 -5 231.28 16.2
 -6 4 -5 216.98 16.8
 6 -4 5 238.78 16.3
 -7 4 -5 459.05 31.7
 -7 4 -5 399.56 31
 -7 4 -5 494.05 32.5
 7 -4 5 487.95 31.8
 -8 4 -5 12.5 2.6
 -8 4 -5 16.3 3.6
 -8 4 -5 14.6 2.9
 8 -4 5 14.9 3.1
 -9 4 -5 -0.6 1.9
 -9 4 -5 -1.3 2
 9 -4 5 -1.2 2.1
 -10 4 -5 109.79 8.7
 -10 4 -5 107.79 9.8
 -11 4 -5 18.6 3.6
 -12 4 -5 0.2 1.8
 -10 -3 5 -0.3 2.3
 -9 -3 5 3.8 2.6
 -8 -3 5 3 2.3
 7 3 -5 131.69 12.7
 -7 -3 5 171.68 14.2
 -7 -3 5 152.08 12.2
 -7 -3 5 200.48 17.5
 6 3 -5 220.98 18.9
 -6 -3 5 291.27 22.8
 -6 -3 5 274.17 20
 5 3 -5 33.9 4.3
 -5 -3 5 49.9 5.5
 4 3 -5 266.67 19.5
 -4 -3 5 291.37 20
 3 3 -5 1141.99 77.59
 -3 -3 5 1193.98 77.99
 2 3 -5 1428.96 99.59
 -2 -3 5 1585.64 99.89
 -1 -3 5 2.7 1.1
 0 3 -5 3.8 0.8
 0 -3 5 7.1 1.1
 -1 3 -5 279.87 20
 -1 3 -5 292.17 19.4
 -2 3 -5 486.55 31.5
 -2 3 -5 450.75 32
 -3 3 -5 1240.58 82.59
 -3 3 -5 1312.37 82.19
 3 -3 5 1160.08 81.49
 -4 3 -5 55.19 5.2
 -4 3 -5 54.39 5.4
 4 -3 5 56.49 4.4
 -5 3 -5 1.5 1.1
 -5 3 -5 1.6 1.6
 5 -3 5 1.2 1.2
 -6 3 -5 659.83 46.1
 -6 3 -5 676.63 45.4
 6 -3 5 677.03 45.4
 -7 3 -5 40.6 4.5
 -7 3 -5 53.39 5
 -7 3 -5 34.5 5.1
 7 -3 5 53.49 5.1
 -8 3 -5 84.69 7.4
 -8 3 -5 90.89 8.3
 8 -3 5 86.89 7.9
 -9 3 -5 19.1 3.9
 -9 3 -5 20.7 3.4
 9 -3 5 21.3 4.1
 -10 3 -5 81.69 7.1
 -10 3 -5 80.99 7.9
 -11 3 -5 2.3 2.2
 -11 -2 5 44.3 4.6
 -10 -2 5 31.6 4.3
 -9 -2 5 2.5 2.4
 -8 -2 5 42.8 4.8
 7 2 -5 386.66 28.5
 7 2 -5 397.86 30.3
 -7 -2 5 422.36 27.8
 -7 -2 5 400.26 32.1
 -7 -2 5 398.86 29.5
 6 2 -5 3 1.8
 6 2 -5 1.1 3.1
 -6 -2 5 11.2 4.4
 -6 -2 5 5 2.7
 -6 -2 5 2.5 2.3
 5 2 -5 22.6 3.3
 -5 -2 5 26.6 3.9
 4 2 -5 326.97 23.5
 -4 -2 5 356.76 23.9
 3 2 -5 59.69 5.1
 -3 -2 5 66.19 5.5
 2 2 -5 556.14 37.2
 -1 -2 5 71.79 5.4
 0 2 -5 7.1 1.1
 0 -2 5 5.7 1.1
 0 -2 5 12.1 1.4
 -1 2 -5 15.8 1.8
 -2 2 -5 41.9 4.1
 2 -2 5 41.7 3.1
 -3 2 -5 0.6 1.3
 -3 2 -5 0.6 0.7
 3 -2 5 1.1 0.8
 -4 2 -5 62.39 4.9
 4 -2 5 60.69 4.9
 -5 2 -5 9.9 1.9
 5 -2 5 10.5 1.9
 -6 2 -5 443.36 31.3
 6 -2 5 470.45 31.5
 -7 2 -5 1047.5 69.99
 -7 2 -5 978.1 70.59
 7 -2 5 1118.09 70.69
 -8 2 -5 567.04 41.5
 -8 2 -5 615.24 40.9
 8 -2 5 615.14 41.6
 -9 2 -5 487.85 31
 -9 2 -5 451.85 31.6
 9 -2 5 435.96 31.7
 9 -2 5 408.36 31.6
 -10 2 -5 11.3 2.9
 -10 2 -5 17.1 3.4
 -11 2 -5 1.3 2
 -11 -1 5 43.9 4.8
 -10 -1 5 1.3 2.1
 -9 -1 5 154.58 12
 8 1 -5 135.59 12.2
 -8 -1 5 145.89 15.5
 -8 -1 5 161.08 11.4
 7 1 -5 850.01 58.39
 -7 -1 5 871.41 59.09
 -7 -1 5 866.51 61.79
 -7 -1 5 839.62 57.49
 6 1 -5 37 4.5
 -6 -1 5 42.4 5.1
 -6 -1 5 34.7 6.7
 5 1 -5 217.28 15.9
 -5 -1 5 224.78 16.3
 4 1 -5 2.3 1.3
 -4 -1 5 2.6 1.6
 3 1 -5 146.59 10.6
 -3 -1 5 148.39 10.8
 2 1 -5 5.4 1.2
 -2 -1 5 5.2 1.4
 -1 -1 5 1612.84 106.49
 0 1 -5 4139.19 271.57
 0 1 -5 4235.88 271.77
 0 -1 5 4019.1 271.77
 -1 1 -5 576.84 37.2
 1 -1 5 545.25 37.3
 -2 1 -5 1113.69 72.39
 2 -1 5 1078.39 72.39
 -3 1 -5 172.38 12
 3 -1 5 173.68 12
 -4 1 -5 0.9 1
 4 -1 5 1.8 1.2
 -5 1 -5 772.82 51.99
 5 -1 5 775.72 51.99
 -6 1 -5 257.07 18.5
 6 -1 5 257.47 18.5
 -7 1 -5 6.3 2.1
 -7 1 -5 12.4 2.9
 7 -1 5 4.4 2.4
 -8 1 -5 14.5 3.3
 -8 1 -5 17.5 3.2
 8 -1 5 11.9 3.1
 8 -1 5 14.5 3.5
 -9 1 -5 26 3.8
 -9 1 -5 19.8 3.9
 -10 1 -5 12.4 3.1
 -11 1 -5 1.5 1.9
 -11 0 5 86.29 7.4
 -10 0 5 4.1 2.1
 -9 0 5 18.5 3.1
 8 0 -5 17.5 3.8
 -8 0 5 23.2 3.2
 7 0 -5 7.8 2.6
 -7 0 5 12 2.3
 -7 0 5 4.7 3.5
 -7 0 5 6.6 3
 6 0 -5 110.89 9.1
 -6 0 5 112.39 11.4
 -6 0 5 110.19 9.4
 5 0 -5 199.78 14.5
 -5 0 5 200.18 14.7
 4 0 -5 968 64.79
 -4 0 5 971.5 64.89
 3 0 -5 125.19 9.1
 2 0 -5 198.38 13.7
 -2 0 5 197.18 13.8
 1 0 -5 6284.87 416.56
 1 0 -5 6222.68 416.46
 -1 0 5 6491.15 416.56
 0 0 -5 972.6 65.19
 0 0 5 994.9 65.19
 -1 0 -5 867.21 56.49
 1 0 5 835.62 56.59
 -2 0 -5 581.74 39.3
 2 0 5 589.04 39.4
 2 0 5 601.34 39.4
 -3 0 -5 523.55 38.1
 -3 0 -5 568.34 37.3
 3 0 5 573.84 37.4
 -4 0 -5 349.07 24
 4 0 5 350.96 24.1
 -5 0 -5 8.7 2
 5 0 5 7.9 2.1
 -6 0 -5 7.7 3.3
 6 0 5 2.3 2
 -7 0 -5 214.38 16.3
 -7 0 -5 208.38 16.7
 7 0 5 234.98 17.1
 7 0 5 243.68 17.2
 -8 0 -5 140.89 10.8
 8 0 5 128.69 11.7
 -9 0 -5 55.19 5.9
 -10 0 -5 62.79 6.2
 -11 0 -5 18.1 2.6
 -11 1 5 109.49 8.9
 -10 1 5 136.09 10.7
 9 -1 -5 102.49 9.8
 -9 1 5 97.99 8.5
 -9 1 5 110.59 12.4
 8 -1 -5 22.8 4.1
 -8 1 5 18.8 5.7
 -8 1 5 28.2 3.5
 7 -1 -5 368.76 24.8
 -7 1 5 347.07 27.4
 -7 1 5 328.97 23.8
 -7 1 5 329.87 24.8
 6 -1 -5 33.9 4.2
 -6 1 5 35.2 4.6
 -6 1 5 37.4 6.2
 5 -1 -5 551.34 37.5
 -5 1 5 549.45 37.6
 4 -1 -5 506.85 33.8
 -4 1 5 489.15 33.3
 3 -1 -5 35.4 3.5
 -3 1 5 32.6 2.8
 -3 1 5 36.2 3.6
 2 -1 -5 68.49 5.4
 -2 1 5 68.39 5.4
 1 -1 -5 537.65 36.2
 1 -1 -5 542.35 36.3
 -1 1 5 544.55 36.3
 0 -1 -5 979.9 68.69
 0 -1 -5 1062.49 68.59
 0 1 5 1061.39 68.69
 -1 -1 -5 775.12 53.39
 -1 -1 -5 800.42 53.49
 1 1 5 832.02 53.59
 -2 -1 -5 515.55 35.7
 -2 -1 -5 538.25 35.7
 2 1 5 544.45 35.8
 -3 -1 -5 427.56 29
 -3 -1 -5 430.26 29.1
 3 1 5 434.46 29.1
 3 1 5 414.06 29
 -4 -1 -5 58.29 5.1
 4 1 5 57.69 5.2
 4 1 5 51.19 5.1
 5 1 5 693.83 47.1
 5 1 5 689.53 47.1
 -6 -1 -5 17.5 2.9
 6 1 5 19.3 3.4
 6 1 5 25.8 4
 -7 -1 -5 6.6 2.4
 7 1 5 8.9 3.2
 -8 -1 -5 93.79 8.1
 8 1 5 86.79 9.2
 -9 -1 -5 -1.5 2.1
 -10 -1 -5 103.89 8.6
 -11 -1 -5 0.3 1.6
 -12 2 5 61.59 5.6
 -11 2 5 2.7 1.9
 -10 2 5 104.39 8.5
 9 -2 -5 173.08 14.5
 -9 2 5 184.38 13.4
 -9 2 5 178.18 17
 8 -2 -5 32.3 4.8
 -8 2 5 36.4 4
 -8 2 5 31.9 6.8
 7 -2 -5 3.6 2.2
 -7 2 5 5.2 1.7
 -7 2 5 3.8 3.2
 6 -2 -5 681.33 45.8
 -6 2 5 653.63 45.8
 -6 2 5 677.13 48.2
 5 -2 -5 323.97 22.4
 -5 2 5 312.17 22.4
 4 -2 -5 52.19 4.8
 -4 2 5 49.5 4.7
 -4 2 5 49.1 4
 3 -2 -5 1577.14 99.69
 -3 2 5 1498.25 99.59
 -3 2 5 1434.96 99.09
 2 -2 -5 23.6 2.8
 -2 2 5 24.8 2.9
 1 -2 -5 2.8 1.2
 1 -2 -5 2 1.2
 -1 2 5 2.2 1.3
 0 -2 -5 47.7 4
 0 -2 -5 41.1 4
 0 2 5 50.09 4.2
 -1 -2 -5 15.4 2.1
 1 2 5 10.9 2
 -2 -2 -5 859.71 58.19
 2 2 5 878.81 58.19
 -3 -2 -5 987.8 68.49
 -3 -2 -5 1006.8 68.69
 3 2 5 1082.89 68.69
 -4 -2 -5 2423.66 171.88
 4 2 5 2764.82 171.98
 5 2 5 269.07 19.7
 -6 -2 -5 332.97 23.9
 6 2 5 349.57 24.9
 -7 -2 -5 58.99 6
 7 2 5 53.99 7
 -8 -2 -5 146.89 11.7
 -9 -2 -5 21.4 3.7
 -10 -2 -5 25.3 3.6
 -12 3 5 16.4 2.8
 -11 3 5 -0.6 1.8
 -10 3 5 2 1.9
 9 -3 -5 58.39 7.4
 -9 3 5 66.59 9.3
 -9 3 5 58.29 6.6
 -9 3 5 60.59 5.8
 8 -3 -5 195.78 15.5
 -8 3 5 197.28 17.9
 -8 3 5 207.78 15.8
 -8 3 5 196.58 14.5
 7 -3 -5 794.22 53.99
 -7 3 5 780.92 53.09
 -7 3 5 796.72 56.69
 6 -3 -5 248.58 18.1
 -6 3 5 255.37 20.5
 -6 3 5 242.68 18.1
 5 -3 -5 106.79 8.5
 -5 3 5 99.59 8.4
 4 -3 -5 70.69 6.2
 -4 3 5 74.99 6.3
 -4 3 5 73.39 5.5
 3 -3 -5 25.1 3.1
 -3 3 5 27.3 3.3
 2 -3 -5 1079.29 72.49
 -2 3 5 1099.29 72.59
 1 -3 -5 -0.9 1
 1 -3 -5 -1.6 1.1
 -1 3 5 -0.6 1.3
 0 -3 -5 22.7 2.9
 0 3 5 23.5 3
 -1 -3 -5 2691.83 176.28
 -1 -3 -5 2612.44 176.38
 1 3 5 2697.03 176.28
 -2 -3 -5 579.54 39.9
 2 3 5 593.44 39.9
 -3 -3 -5 810.32 55.29
 3 3 5 823.52 55.29
 -4 -3 -5 108.39 9.1
 4 3 5 103.69 8.9
 -5 -3 -5 119.19 9.7
 5 3 5 131.19 10.8
 -6 -3 -5 42.9 5
 6 3 5 52.69 6.6
 -7 -3 -5 7.9 2.7
 7 3 5 10.2 4.2
 -8 -3 -5 43.5 5.4
 -9 -3 -5 14.7 3.2
 -10 -3 -5 -0.4 1.8
 -12 4 5 5.9 2.1
 -11 4 5 5.9 2.3
 -10 4 5 1.1 3.6
 -10 4 5 1.9 1.8
 -10 4 5 -1.2 2.2
 9 -4 -5 116.09 10.6
 -9 4 5 121.99 10.9
 -9 4 5 115.89 12.9
 -9 4 5 123.49 9.5
 8 -4 -5 86.99 8.4
 -8 4 5 95.89 7.6
 -8 4 5 87.59 10.5
 7 -4 -5 61.99 6.3
 -7 4 5 65.29 8.3
 -7 4 5 53.09 5.2
 6 -4 -5 11.3 2.6
 -6 4 5 16.9 4.6
 5 -4 -5 351.46 24.7
 4 -4 -5 132.19 10.1
 -4 4 5 132.29 10.2
 3 -4 -5 2.6 1.5
 -3 4 5 0.9 1.5
 2 -4 -5 347.57 23.8
 -2 4 5 343.07 23.9
 1 -4 -5 1671.23 108.19
 -1 4 5 1588.74 108.29
 0 -4 -5 164.38 12.3
 0 4 5 167.48 12.2
 -1 -4 -5 780.22 52.99
 1 4 5 791.02 52.89
 -2 -4 -5 146.39 11.3
 2 4 5 140.09 11
 -3 -4 -5 26.7 4.1
 3 4 5 27.6 4.1
 -4 -4 -5 925.81 63.29
 4 4 5 937.01 63.49
 -5 -4 -5 211.08 15.9
 5 4 5 223.98 17.2
 -6 -4 -5 5.2 2.5
 6 4 5 7 3.7
 -7 -4 -5 295.67 21.4
 -8 -4 -5 117.39 9.9
 -9 -4 -5 7.5 2.4
 -12 5 5 313.87 21.7
 -11 5 5 198.68 15.7
 -11 5 5 212.88 14.9
 -10 5 5 63.59 5.7
 -10 5 5 55.39 6.6
 -10 5 5 50.19 8.3
 9 -5 -5 39 5.8
 -9 5 5 44.1 8.2
 -9 5 5 48.7 6.6
 -9 5 5 37.2 4.5
 8 -5 -5 47.6 6
 -8 5 5 44.6 7.8
 -8 5 5 38.5 4.7
 7 -5 -5 330.97 23.8
 -7 5 5 350.26 26.7
 -7 5 5 305.87 22.9
 6 -5 -5 54.19 5.5
 -6 5 5 45.9 7.1
 5 -5 -5 0.5 1.6
 -5 5 5 3.5 2.7
 4 -5 -5 94.39 7.7
 -4 5 5 92.89 7.7
 3 -5 -5 73.39 6.4
 -3 5 5 74.09 6.4
 2 -5 -5 4.1 1.8
 -2 5 5 2.5 1.7
 1 -5 -5 160.08 11.5
 -1 5 5 142.89 11.3
 0 -5 -5 770.22 52.69
 0 5 5 786.42 52.49
 -1 -5 -5 3.2 2.1
 1 5 5 4.2 1.8
 -2 -5 -5 228.08 16.8
 2 5 5 221.88 16.5
 -3 -5 -5 215.18 16
 3 5 5 203.68 15.9
 -4 -5 -5 93.19 8.8
 -4 -5 -5 92.59 8
 4 5 5 87.39 8.7
 -5 -5 -5 56.59 5.9
 5 5 5 45.2 6.5
 -6 -5 -5 22.1 3.9
 6 5 5 21.4 4.9
 -7 -5 -5 23.2 4.1
 -8 -5 -5 47 5.2
 -9 -5 -5 2.2 1.9
 9 5 5 0.6 2.1
 -12 6 5 36.6 3.7
 -12 6 5 33.5 4.3
 -11 6 5 29.1 4.6
 -11 6 5 21.2 3.2
 -10 6 5 54.59 7.1
 -10 6 5 55.29 5.3
 -10 6 5 48.3 8.6
 9 -6 -5 62.99 7.1
 -9 6 5 68.39 8.3
 -9 6 5 65.99 6.2
 -9 6 5 64.89 9.3
 8 -6 -5 164.38 13.6
 -8 6 5 171.58 16.5
 -8 6 5 168.58 12.5
 7 -6 -5 30.6 4.4
 -7 6 5 23.8 3.4
 -7 6 5 28.3 6.5
 6 -6 -5 282.37 19.9
 -6 6 5 260.27 22.1
 5 -6 -5 151.88 11.8
 -5 6 5 149.19 13.8
 4 -6 -5 10.6 2.4
 -4 6 5 6.8 4.5
 3 -6 -5 24.3 3.6
 -3 6 5 29.4 3.6
 2 -6 -5 103.79 8.4
 -2 6 5 95.19 8.1
 1 -6 -5 106.59 9
 -1 6 5 110.69 8.7
 0 -6 -5 178.28 13.2
 0 6 5 159.68 12.5
 -1 -6 -5 593.54 40
 1 6 5 563.14 39.5
 -2 -6 -5 460.05 31.2
 2 6 5 420.36 30.6
 -3 -6 -5 41.9 5.5
 -3 -6 -5 41.1 4.7
 3 6 5 31 4.8
 3 6 5 33.7 4.2
 -4 -6 -5 265.57 19.9
 -4 -6 -5 255.77 18.9
 4 6 5 256.77 18.4
 4 6 5 262.07 19.8
 -5 -6 -5 79.29 7.2
 5 6 5 65.29 8.2
 -6 -6 -5 7.3 2.9
 -7 -6 -5 22.2 3.7
 7 6 5 16.7 3.9
 -8 -6 -5 54.19 5.4
 8 6 5 51.09 5.8
 -12 7 5 72.29 6.7
 -12 7 5 75.99 5.9
 -11 7 5 43.7 5.8
 -11 7 5 35.1 7
 -11 7 5 38 4
 -10 7 5 16.6 5.8
 -10 7 5 19 4.4
 -10 7 5 18.5 2.9
 -9 7 5 16.8 2.9
 -9 7 5 18.5 6
 -9 7 5 19.1 4.9
 8 -7 -5 1.7 2.4
 -8 7 5 1.6 1.6
 -8 7 5 3 4
 7 -7 -5 1079.09 72.59
 -7 7 5 1093.59 71.59
 -7 7 5 1032 75.49
 6 -7 -5 69.89 7
 -6 7 5 74.49 10
 -6 7 5 66.99 9.2
 5 -7 -5 31.1 4.3
 -5 7 5 33.6 6.7
 4 -7 -5 16.9 3
 -4 7 5 7.2 3.8
 3 -7 -5 773.42 50.69
 -3 7 5 714.23 52.69
 2 -7 -5 638.84 43.9
 1 -7 -5 322.57 22.6
 -1 7 5 301.77 22.1
 0 -7 -5 353.06 24.4
 0 7 5 322.27 23.8
 -1 -7 -5 1.3 2.4
 1 7 5 2.6 2.1
 1 7 5 0.6 2
 -2 -7 -5 71.19 7.5
 2 7 5 73.29 7.2
 2 7 5 60.69 6.8
 2 7 5 82.09 6.3
 2 7 5 79.59 8.5
 -3 -7 -5 18.6 4.1
 -3 -7 -5 15.8 3.1
 3 7 5 16.4 3.6
 3 7 5 13.7 3.8
 3 7 5 14.1 2.6
 -4 -7 -5 1.7 2.3
 -4 -7 -5 1.3 3.2
 4 7 5 3.1 1.7
 4 7 5 2 2.6
 -5 -7 -5 32.4 4.7
 5 7 5 28.4 4.8
 -6 -7 -5 -0.6 2.4
 6 7 5 1.6 2.6
 -7 -7 -5 13 2.9
 7 7 5 8.8 3
 -8 -7 -5 42.1 4.4
 8 7 5 37.6 5.4
 -12 8 5 50.79 5.4
 -11 8 5 32.3 4.9
 -11 8 5 22.3 6
 -11 8 5 26.5 3
 -10 8 5 13 4.9
 -10 8 5 16.3 2.5
 -10 8 5 10.2 3.8
 -9 8 5 22.9 5.4
 -9 8 5 23.1 3.5
 -9 8 5 35 7.6
 8 -8 -5 1575.54 108.49
 -8 8 5 1729.53 112.49
 -8 8 5 1527.05 107.19
 7 -8 -5 858.21 57.89
 -7 8 5 885.31 61.59
 -7 8 5 792.92 59.49
 -7 8 5 829.02 56.79
 6 -8 -5 63.79 6.7
 -6 8 5 66.59 9.4
 -6 8 5 51.29 8
 5 -8 -5 99.49 9
 -5 8 5 84.99 11.1
 -5 8 5 126.39 11.3
 4 -8 -5 53.39 5.8
 -4 8 5 42.6 7.6
 3 -8 -5 17.2 3.6
 -3 8 5 20.7 5.4
 2 -8 -5 170.98 12.8
 -2 8 5 145.79 14.7
 1 -8 -5 1323.57 83.09
 -1 8 5 1138.69 84.79
 0 -8 -5 1518.75 104.89
 0 8 5 1585.64 103.79
 0 8 5 1580.94 105.79
 -1 -8 -5 14.7 3.8
 1 8 5 19.7 5
 1 8 5 15.6 3.3
 1 8 5 18.2 2.8
 -2 -8 -5 78.69 8.9
 2 8 5 103.19 7.7
 2 8 5 96.99 10
 2 8 5 88.79 8.3
 -3 -8 -5 -2.2 3
 3 8 5 2.1 3.8
 3 8 5 0.5 1.7
 3 8 5 -0.9 2.3
 -4 -8 -5 4.2 2.5
 4 8 5 -0.5 2.4
 4 8 5 3.7 1.8
 -5 -8 -5 0.9 2.4
 5 8 5 -0.2 2.4
 -6 -8 -5 96.79 8.3
 6 8 5 88.39 8.4
 -7 -8 -5 37.4 4.5
 7 8 5 40.7 4.8
 -12 9 5 0.4 1.8
 -11 9 5 126.19 12.4
 -11 9 5 106.79 10
 -11 9 5 110.09 8.2
 -10 9 5 23.4 4.6
 -10 9 5 22.1 2.8
 -10 9 5 15.7 5.8
 -9 9 5 32.2 7.4
 -9 9 5 16.5 2.8
 -9 9 5 12.4 4.1
 8 -9 -5 32.6 5.1
 -8 9 5 25.5 7
 -8 9 5 31.1 3.9
 7 -9 -5 134.09 11.1
 -7 9 5 132.09 14.3
 -7 9 5 115.49 9.7
 -7 9 5 108.59 12.3
 6 -9 -5 34.8 5.3
 -6 9 5 39.6 8.1
 -6 9 5 30.1 6.3
 5 -9 -5 36.8 5.3
 -5 9 5 34.4 6.7
 -5 9 5 44.9 8.9
 4 -9 -5 24.6 4.3
 -4 9 5 31.4 3.8
 -4 9 5 8.8 4.9
 -4 9 5 36.9 7.7
 -4 9 5 22.8 5.4
 3 -9 -5 103.89 9.5
 -3 9 5 111.69 8.4
 -3 9 5 101.99 11.2
 -3 9 5 114.09 11.1
 -3 9 5 86.99 11.5
 2 -9 -5 98.19 8.2
 -2 9 5 77.69 6.3
 -2 9 5 64.09 9
 -2 9 5 57.89 8.5
 1 -9 -5 244.48 17.2
 -1 9 5 208.28 18.3
 -1 9 5 209.48 18.1
 -1 9 5 207.18 15.5
 0 -9 -5 164.78 13.3
 0 9 5 152.88 14.2
 0 9 5 153.18 11.8
 -1 -9 -5 195.58 14.4
 1 9 5 159.08 12.7
 1 9 5 144.59 14.8
 1 9 5 186.18 13.6
 -2 -9 -5 122.69 12.1
 2 9 5 139.09 11.7
 2 9 5 154.68 13.6
 2 9 5 147.29 11
 3 9 5 8 2.3
 3 9 5 10.8 3.4
 3 9 5 13.4 4.5
 4 9 5 11.5 3.3
 4 9 5 5.5 2.6
 -5 -9 -5 43.8 5.1
 5 9 5 39.5 5.3
 -6 -9 -5 6.6 2.7
 6 9 5 11 2.9
 -11 10 5 45.7 5.5
 -10 10 5 6.8 1.6
 -10 10 5 3.9 4
 -10 10 5 13.7 3.5
 -9 10 5 32.1 5.5
 -9 10 5 26.4 7
 -9 10 5 29.7 3.4
 -8 10 5 6.6 2.1
 -8 10 5 13.6 5.8
 -8 10 5 6.3 4.2
 7 -10 -5 4.7 3
 -7 10 5 6.1 5
 -7 10 5 3.3 2
 -7 10 5 10.6 4.5
 6 -10 -5 87.29 9
 -6 10 5 101.49 11
 -6 10 5 86.79 12.2
 5 -10 -5 19 4.3
 -5 10 5 37.4 7
 -5 10 5 23 7.1
 -5 10 5 40 4.3
 4 -10 -5 290.77 21
 -4 10 5 307.17 24.7
 -4 10 5 260.67 22.4
 -4 10 5 241.88 22.4
 -4 10 5 265.67 19.6
 3 -10 -5 25 4.4
 -3 10 5 12.5 4.8
 -3 10 5 27.4 6.6
 -3 10 5 18.9 3.1
 -3 10 5 13.9 5.1
 2 -10 -5 1.3 2.6
 -2 10 5 1 1.6
 -2 10 5 -2.1 3.1
 -2 10 5 -0.9 3.9
 1 -10 -5 0.3 2.6
 -1 10 5 1.5 1.7
 -1 10 5 1.2 3.6
 -1 10 5 0 4.1
 0 -10 -5 84.09 9.2
 0 10 5 100.79 11
 0 10 5 96.89 8
 -1 -10 -5 15.9 4.3
 1 10 5 20.8 3.3
 1 10 5 17.7 3.9
 1 10 5 24.2 5.7
 2 10 5 32.7 6.3
 2 10 5 22.1 4.2
 2 10 5 24.3 3.5
 3 10 5 35.6 4.3
 3 10 5 40.7 6.6
 3 10 5 29 4.9
 4 10 5 86.59 8.3
 5 10 5 0.5 2.3
 -11 11 5 -0.4 1.8
 -10 11 5 141.89 14
 -10 11 5 124.09 11
 -9 11 5 76.59 10.6
 -9 11 5 57.79 7.1
 -9 11 5 67.09 5.5
 -8 11 5 23.8 3.1
 -8 11 5 25.7 6
 -8 11 5 27.3 7.4
 -7 11 5 9.6 5.5
 -7 11 5 3.9 1.9
 -7 11 5 2.9 3.9
 6 -11 -5 18.1 4.4
 -6 11 5 27.2 7.4
 -6 11 5 16.3 5.4
 5 -11 -5 12 3.7
 -5 11 5 13.8 6
 -5 11 5 15.2 5.2
 -5 11 5 14.5 3
 4 -11 -5 39.4 6.1
 -4 11 5 50.69 5.2
 -4 11 5 55.89 8.3
 -4 11 5 33.7 7.9
 -4 11 5 43.3 8.2
 3 -11 -5 71.59 8.2
 -3 11 5 84.89 10.9
 -3 11 5 94.39 10.5
 -3 11 5 55.69 11
 -3 11 5 81.99 7.1
 2 -11 -5 96.69 9.9
 -2 11 5 101.29 11.7
 -2 11 5 106.69 11.7
 -2 11 5 102.69 8.6
 1 -11 -5 24.5 5.1
 -1 11 5 38.7 7.1
 -1 11 5 37 4.4
 0 11 5 64.89 9.3
 0 11 5 67.19 6.6
 1 11 5 166.48 13.1
 1 11 5 178.68 15.7
 2 11 5 25.7 3.6
 2 11 5 21.5 4.1
 2 11 5 26.5 5.9
 3 11 5 47.7 5.1
 3 11 5 46.5 7.1
 3 11 5 56.79 6
 4 11 5 118.89 9.7
 -10 12 5 37.7 6.7
 -10 12 5 35.5 4.5
 -9 12 5 37.1 4.9
 -9 12 5 36.4 7.5
 -9 12 5 37.7 6.4
 -8 12 5 0.8 3.9
 -8 12 5 -0.4 3.1
 -8 12 5 -2.4 2.4
 -8 12 5 2.2 1.2
 -7 12 5 50.49 4.7
 -7 12 5 74.29 10.5
 -7 12 5 33.4 7.3
 -6 12 5 11.1 5
 -6 12 5 44.7 8.5
 -5 12 5 27.8 7.6
 -5 12 5 38.6 4.6
 -5 12 5 50.39 8.3
 -4 12 5 30.9 7.2
 -4 12 5 32.3 7.1
 -4 12 5 25.5 3.9
 -3 12 5 86.89 10.9
 -3 12 5 80.49 7.6
 -3 12 5 89.29 11.7
 -2 12 5 10.8 5.4
 -2 12 5 6.4 4.5
 -2 12 5 3.5 2.3
 -1 12 5 4 5
 -1 12 5 3.6 2.3
 0 12 5 116.49 12.4
 0 12 5 107.69 9.2
 1 12 5 28.4 4
 1 12 5 27.2 6.2
 2 12 5 0.2 1.8
 2 12 5 -2.1 3.9
 -9 13 5 42.9 6.3
 -9 13 5 50.89 8.3
 -9 13 5 44.7 4.9
 -8 13 5 57.99 7.5
 -8 13 5 38.1 7.8
 -7 13 5 26 6.8
 -7 13 5 21.9 5.4
 -6 13 5 43.7 4.5
 -6 13 5 47.6 8.1
 -6 13 5 63.29 10.6
 -5 13 5 100.39 11.5
 -5 13 5 92.59 8.2
 -4 13 5 29.2 6.8
 -4 13 5 45 8
 -4 13 5 37.3 4.5
 -3 13 5 -1.6 4.9
 -3 13 5 4.2 4.2
 -3 13 5 2 2
 -2 13 5 0.7 2.1
 -2 13 5 3.8 5.1
 -2 13 5 3.1 4
 -1 13 5 215.38 17.8
 -1 13 5 189.48 14.9
 0 13 5 85.39 7.7
 0 13 5 97.29 10.6
 1 13 5 18.9 3
 1 13 5 20.7 4.9
 2 13 5 0.6 1.6
 2 13 5 1.4 3.5
 -9 14 5 0.3 3.7
 -8 14 5 43.5 6.2
 -7 14 5 2.7 3.4
 -6 14 5 19.9 5.2
 -6 14 5 21 3.3
 -5 14 5 63.79 8.5
 -5 14 5 66.09 6.1
 -4 14 5 39.2 6.7
 -4 14 5 44.1 4.7
 -3 14 5 69.09 6.6
 -3 14 5 82.09 9.8
 -3 14 5 73.79 9
 -2 14 5 81.29 9.3
 -2 14 5 63.29 6.3
 -1 14 5 26.3 3.5
 -1 14 5 23.1 5.5
 0 14 5 38.4 4.3
 0 14 5 42.9 6.3
 1 14 5 12.5 3.8
 1 14 5 13.2 2.4
 -7 15 5 58.59 6.9
 -6 15 5 15 4
 -5 15 5 3.3 1.8
 -5 15 5 7 3.5
 -4 15 5 39.8 6.2
 -4 15 5 49.4 4.6
 -3 15 5 6.1 1.9
 -2 15 5 0.3 1.6
 -3 16 -6 3 1.6
 -4 16 -6 -0.2 1.5
 -4 16 -6 0.4 2.8
 -5 16 -6 14.9 2.4
 -5 16 -6 12.2 3.8
 -6 16 -6 11.8 2.2
 -6 16 -6 12.5 3.7
 0 15 -6 2.9 2.6
 0 15 -6 6.4 3
 -1 15 -6 4.7 1.9
 -1 15 -6 5.6 2.9
 -1 15 -6 3.6 3.4
 -2 15 -6 -0.5 1.6
 -2 15 -6 4.3 2.8
 -2 15 -6 4.1 3.6
 -3 15 -6 11.4 3.6
 -3 15 -6 12.3 2.6
 -3 15 -6 13.9 4.7
 -4 15 -6 2.6 2.8
 -4 15 -6 3.3 3.7
 -4 15 -6 1.9 1.9
 -5 15 -6 5.8 2.1
 -5 15 -6 3.5 3.7
 -6 15 -6 -0.6 3
 -6 15 -6 -1.8 1.7
 -7 15 -6 21.6 3.1
 -7 15 -6 19.9 4.7
 -7 15 -6 15.5 3
 -8 15 -6 6 1.9
 -8 15 -6 5.6 2
 -8 15 -6 4.7 3
 2 14 -6 19.2 3.6
 1 14 -6 6.6 2.9
 1 14 -6 6.1 3.4
 0 14 -6 61.79 6.9
 0 14 -6 55.79 7.4
 -1 14 -6 9.8 4.1
 -1 14 -6 9 2.5
 -1 14 -6 6.4 3.3
 -2 14 -6 1.2 3.7
 -2 14 -6 2.3 4.3
 -2 14 -6 0.8 3.3
 -2 14 -6 -0.2 2.1
 -3 14 -6 88.99 9.6
 -3 14 -6 95.29 10.5
 -3 14 -6 85.89 8
 -4 14 -6 11.7 2.9
 -4 14 -6 8.3 4.8
 -4 14 -6 8.1 3.9
 -5 14 -6 54.19 8.5
 -5 14 -6 54.79 5.7
 -6 14 -6 4.9 2.5
 -6 14 -6 0.2 2
 -6 14 -6 0.8 3.9
 -7 14 -6 1.5 2.2
 -7 14 -6 -0.4 2.1
 -7 14 -6 -0.2 3.4
 -8 14 -6 2.1 2.1
 -8 14 -6 -0.3 3.1
 -8 14 -6 3 2
 -9 14 -6 2.8 1.9
 -9 14 -6 2.2 3
 3 13 -6 8.5 3.1
 3 13 -6 9.4 2.9
 2 13 -6 2.5 2.8
 2 13 -6 4.3 3.3
 1 13 -6 10.7 4.3
 1 13 -6 16.9 4.2
 0 13 -6 18.9 3.1
 0 13 -6 15.2 4.7
 0 13 -6 11.7 3.9
 -1 13 -6 21.9 3.8
 -1 13 -6 30.6 5.4
 -1 13 -6 35 5.9
 -2 13 -6 3.1 4.2
 -2 13 -6 12.2 4.2
 -2 13 -6 6.9 2.6
 -2 13 -6 19.1 4.6
 -3 13 -6 13.5 4.7
 -3 13 -6 13 3.1
 -3 13 -6 8.4 4.5
 -4 13 -6 5.3 2.8
 -4 13 -6 6.1 3.9
 -4 13 -6 3.2 4.3
 -5 13 -6 11.9 3.2
 -5 13 -6 15.1 4.6
 -5 13 -6 11.9 5.2
 -5 13 -6 8.1 2.9
 -6 13 -6 5.2 4.5
 -6 13 -6 0.6 2.5
 -6 13 -6 4.5 2.6
 -7 13 -6 37.3 4.9
 -7 13 -6 36.2 7.2
 -7 13 -6 35.7 4.8
 -8 13 -6 10.2 4.6
 -8 13 -6 8.4 2.7
 -8 13 -6 8.6 2.9
 -9 13 -6 16.3 3.2
 -9 13 -6 14.4 5.6
 -10 13 -6 80.29 6.9
 4 12 -6 5.6 2.6
 4 12 -6 6.2 2.9
 3 12 -6 9.5 3.4
 3 12 -6 8.9 3.5
 2 12 -6 122.69 11.4
 2 12 -6 136.99 12.2
 1 12 -6 -0.2 3.2
 1 12 -6 0.1 2.9
 0 12 -6 32.6 5.5
 0 12 -6 27.8 4.4
 0 12 -6 29.8 4
 0 12 -6 23.1 5
 -1 12 -6 5.8 3.6
 -1 12 -6 4.4 2.4
 -1 12 -6 7 3.7
 -1 12 -6 5.1 4.3
 -2 12 -6 -0.1 4
 -2 12 -6 1.9 2.2
 -2 12 -6 0.6 3.1
 -2 12 -6 1.6 3.2
 -3 12 -6 17.3 4.9
 -3 12 -6 21.1 3.8
 -3 12 -6 22.3 6
 -4 12 -6 12.3 3.2
 -4 12 -6 9.4 4.3
 -4 12 -6 16.2 3.5
 -4 12 -6 20 5.9
 -5 12 -6 3.8 3.7
 -5 12 -6 -1.7 2.4
 -5 12 -6 -1.8 2.4
 -5 12 -6 -0.9 4
 -6 12 -6 43.2 8.2
 -6 12 -6 44.8 5.7
 -6 12 -6 48.5 5.8
 -7 12 -6 1 2.8
 -7 12 -6 9.3 2.9
 -8 12 -6 8 4.5
 -8 12 -6 8.5 2.9
 -8 12 -6 5.4 2.9
 -9 12 -6 12.9 3.3
 -10 12 -6 2.1 2.1
 -10 12 -6 2.9 2.1
 -11 12 -6 4 1.9
 5 11 -6 2.2 2.6
 5 11 -6 2 2.5
 4 11 -6 62.49 7
 4 11 -6 61.59 7.3
 3 11 -6 29.3 5.6
 3 11 -6 43.4 6
 2 11 -6 2.7 2.7
 2 11 -6 4.5 3.7
 2 11 -6 7.5 3.3
 1 11 -6 3 2.9
 1 11 -6 3.2 2.6
 1 11 -6 3.9 3.4
 0 11 -6 32.5 4.8
 0 11 -6 36.9 5.7
 0 11 -6 32.5 5.6
 0 11 -6 41 4.8
 0 -11 6 35.5 5.3
 -1 11 -6 77.59 9.5
 -1 11 -6 61.19 6.1
 -1 11 -6 59.09 6.7
 -1 11 -6 41.9 6.7
 -1 11 -6 56.69 7.1
 -2 11 -6 14.9 4.1
 -2 11 -6 34.5 5.5
 -2 11 -6 7.9 4.6
 -2 11 -6 16.6 3.4
 -3 11 -6 319.67 24.2
 -3 11 -6 334.17 24.7
 -3 11 -6 362.56 26.4
 -3 11 -6 265.67 24.7
 -3 11 -6 335.57 23.3
 -4 11 -6 17.2 5
 -4 11 -6 30.4 6.3
 -4 11 -6 20.8 3.7
 -4 11 -6 15.9 3.6
 -4 11 -6 13.3 5.3
 -5 11 -6 263.37 20.9
 -5 11 -6 276.17 22.4
 -5 11 -6 292.37 20.9
 -5 11 -6 303.07 24.2
 -6 11 -6 141.79 14.1
 -6 11 -6 106.59 10.2
 -6 11 -6 119.39 10.5
 -7 11 -6 60.99 7.1
 -7 11 -6 66.79 10.1
 -7 11 -6 73.79 7.2
 -8 11 -6 17.9 3.7
 -8 11 -6 18.3 3.6
 -8 11 -6 10.2 5
 -9 11 -6 2.1 2.4
 -9 11 -6 1.3 2.4
 -10 11 -6 1.1 2.5
 -10 11 -6 2.6 2.3
 -11 11 -6 3.4 2.1
 -11 11 -6 0 1.9
 6 10 -6 0.2 2.4
 6 10 -6 0 2.3
 5 10 -6 66.09 7.2
 5 10 -6 71.29 7.6
 4 10 -6 62.69 7.4
 4 10 -6 68.59 8.2
 3 10 -6 8.4 3.7
 3 10 -6 1.4 2.9
 3 10 -6 5.8 3
 2 10 -6 253.87 19.3
 2 10 -6 256.47 19.7
 2 10 -6 235.18 18.9
 -2 -10 6 258.87 19.4
 1 10 -6 10.5 3.6
 1 10 -6 9.5 3.2
 1 10 -6 11.7 3.2
 -1 -10 6 11.9 3.4
 0 10 -6 0.4 2.1
 0 10 -6 -0.3 2.6
 0 10 -6 0 2.2
 0 10 -6 1.5 2.3
 0 -10 6 0.7 2.4
 -1 10 -6 17.1 5.3
 -1 10 -6 12.3 3.5
 -1 10 -6 15.3 3.9
 -1 10 -6 14.7 3.1
 -1 10 -6 11.2 3
 -2 10 -6 27.3 5.3
 -2 10 -6 13.1 3.8
 -2 10 -6 20.9 5.5
 -2 10 -6 12.2 3
 -2 10 -6 17.6 4.3
 -3 10 -6 339.87 24.9
 -3 10 -6 295.37 22.4
 -3 10 -6 305.27 25.2
 -3 10 -6 305.97 22.7
 -3 10 -6 327.17 24
 -4 10 -6 16.3 4.9
 -4 10 -6 31.3 3.4
 -4 10 -6 22.7 5.1
 -4 10 -6 47.9 5
 -4 10 -6 11.5 5.9
 -5 10 -6 15.9 3.4
 -5 10 -6 8.6 2.4
 -5 10 -6 10.3 4.9
 -5 10 -6 13.9 5.1
 -5 10 -6 12.5 4.1
 -5 10 -6 15 6.1
 -5 10 -6 8.5 2.9
 -6 10 -6 247.38 24.7
 -6 10 -6 219.78 16.4
 -6 10 -6 239.78 17.3
 -6 10 -6 199.68 20.7
 -6 10 -6 240.28 17.1
 -6 10 -6 230.18 20.2
 -7 10 -6 93.09 12.6
 -7 10 -6 116.09 10.2
 -7 10 -6 129.69 10
 -8 10 -6 2.8 2.6
 -8 10 -6 2.3 2.9
 -8 10 -6 2 2.6
 -9 10 -6 43.8 6.1
 -9 10 -6 56.09 6.4
 -10 10 -6 120.99 10.7
 -10 10 -6 131.79 11.1
 -11 10 -6 73.69 6.9
 -11 10 -6 64.59 6.5
 7 9 -6 0.9 2.6
 6 9 -6 7.4 3.1
 6 9 -6 4.7 2.7
 5 9 -6 156.58 14
 5 9 -6 200.38 14.9
 4 9 -6 6.8 3
 4 9 -6 15.2 4.1
 3 9 -6 19.7 4.7
 3 9 -6 29.7 5
 3 9 -6 16.1 4
 -3 -9 6 40.2 5.7
 2 9 -6 -1.2 2.6
 2 9 -6 -0.7 2.2
 2 9 -6 0.5 2.2
 -2 -9 6 1.7 2.7
 1 9 -6 26.8 4.2
 1 9 -6 24.7 4.4
 1 9 -6 27.8 4.5
 -1 -9 6 27.7 4.4
 0 9 -6 1.3 2.1
 0 9 -6 0.4 2
 0 9 -6 3.1 2.2
 0 9 -6 0.5 2.3
 0 -9 6 -0.1 2
 -1 9 -6 43.8 5.8
 -1 9 -6 45.4 5.5
 -1 9 -6 43.1 5.1
 1 -9 6 51.39 5.9
 -2 9 -6 276.97 20.8
 -2 9 -6 270.27 19.8
 -2 9 -6 270.57 23.9
 -2 9 -6 277.97 21.4
 -3 9 -6 5.6 3.2
 -3 9 -6 1.8 3.5
 -3 9 -6 11.3 4.9
 -3 9 -6 4.8 2.9
 -3 9 -6 2.8 2.2
 -4 9 -6 1 2.1
 -4 9 -6 -2.6 2.5
 -4 9 -6 1.7 2.1
 -4 9 -6 2.6 3
 -4 9 -6 0.1 1.3
 -4 9 -6 0.5 3.4
 -4 9 -6 1.6 3.7
 -5 9 -6 222.68 17.3
 -5 9 -6 240.68 18.5
 -5 9 -6 221.78 17.5
 -5 9 -6 251.07 16.8
 -6 9 -6 35.8 4.3
 -6 9 -6 38.7 7.3
 -6 9 -6 22.2 6.5
 -6 9 -6 44.2 8.3
 -6 9 -6 27.7 4.2
 -7 9 -6 166.98 13.5
 -7 9 -6 156.88 15.9
 -7 9 -6 161.68 12.7
 -8 9 -6 20.7 3.6
 -8 9 -6 25.4 4.7
 -9 9 -6 390.46 28.3
 -9 9 -6 393.76 28.7
 -10 9 -6 233.18 18.3
 -10 9 -6 237.18 17.9
 -11 9 -6 3.7 2.4
 -11 9 -6 3.4 2.7
 -12 9 -6 2 2.1
 7 8 -6 30.7 4.4
 6 8 -6 10.2 3.6
 6 8 -6 13.9 3.5
 5 8 -6 53.69 7.3
 5 8 -6 50.99 6.3
 4 8 -6 1.1 2.5
 4 8 -6 0.9 2.9
 4 8 -6 0.7 2.3
 -4 -8 6 -3 2.9
 3 8 -6 8.7 3.5
 3 8 -6 17.5 3.7
 3 8 -6 7.4 3
 -3 -8 6 20.3 4.3
 2 8 -6 355.66 26.6
 2 8 -6 365.36 26.3
 2 8 -6 379.26 26.2
 -2 -8 6 365.56 26.5
 1 8 -6 278.77 19.7
 1 8 -6 269.27 20.2
 1 8 -6 267.97 20
 -1 -8 6 271.67 19.9
 0 8 -6 250.07 18.4
 0 -8 6 240.68 17.7
 -1 8 -6 239.58 17.8
 -1 8 -6 240.68 18.3
 -1 8 -6 225.58 20.7
 1 -8 6 237.68 16.7
 -2 8 -6 5.5 3.8
 -2 8 -6 6.4 3
 -2 8 -6 4.2 2.7
 -3 8 -6 175.38 16.5
 -3 8 -6 174.58 14.1
 -3 8 -6 179.08 15
 -4 8 -6 11.9 3.9
 -4 8 -6 8 4.1
 -5 8 -6 640.74 50.79
 -5 8 -6 788.62 48.8
 -5 8 -6 695.63 49.6
 -5 8 -6 746.53 48.4
 -5 8 -6 736.83 52.39
 -5 8 -6 695.33 52.29
 -6 8 -6 42.7 7.4
 -6 8 -6 32.6 4.9
 -6 8 -6 40.3 4.5
 -6 8 -6 17.9 5.4
 -6 8 -6 31.1 3.9
 -7 8 -6 50.49 6.8
 -7 8 -6 56.89 5.8
 -7 8 -6 54.69 8.6
 -7 8 -6 54.69 5.4
 -8 8 -6 1.9 2.8
 -9 8 -6 45.1 6.4
 -9 8 -6 38.4 5.7
 -10 8 -6 16.2 4.1
 -10 8 -6 14.8 3.8
 -11 8 -6 1.6 2.6
 -12 8 -6 85.39 7.6
 7 7 -6 -0.1 2.4
 7 7 -6 0.8 2.7
 6 7 -6 3.7 2.6
 6 7 -6 5.5 3.4
 5 7 -6 93.79 9.1
 5 7 -6 83.19 8.2
 5 7 -6 79.49 8.2
 -5 -7 6 82.09 9.2
 4 7 -6 5.3 2.8
 4 7 -6 8.1 3.4
 4 7 -6 9.6 2.9
 -4 -7 6 8.6 3.8
 3 7 -6 12.2 3.5
 3 7 -6 14.5 3.2
 -3 -7 6 16.4 3.8
 2 7 -6 6.5 2.3
 2 7 -6 2.3 2.5
 -2 -7 6 6 2.9
 1 7 -6 370.26 25.7
 -1 -7 6 348.17 25.4
 0 7 -6 235.38 21.1
 0 -7 6 274.77 18.2
 -1 7 -6 115.99 10.4
 -1 7 -6 100.69 15.8
 1 -7 6 131.19 9
 -2 7 -6 121.09 10.9
 -2 7 -6 124.89 8.8
 -3 7 -6 48.1 6.1
 -3 7 -6 36.6 7.2
 -4 7 -6 24.1 5
 -4 7 -6 28.7 5.8
 -5 7 -6 212.58 17.2
 -5 7 -6 192.98 17.9
 -5 7 -6 214.58 15.9
 -6 7 -6 84.59 7.3
 -6 7 -6 77.29 8.5
 -6 7 -6 74.89 7.3
 -6 7 -6 101.99 10.2
 -6 7 -6 96.39 10.8
 -7 7 -6 62.99 6.1
 -7 7 -6 69.99 6.2
 -7 7 -6 58.59 7.1
 -8 7 -6 15.4 4
 -9 7 -6 198.08 15.6
 -9 7 -6 171.78 14.8
 -10 7 -6 78.79 8.6
 -11 7 -6 51.49 6.3
 -12 7 -6 320.07 22.8
 7 6 -6 136.59 12.4
 7 6 -6 153.18 12
 6 6 -6 177.38 14.4
 6 6 -6 167.38 13.7
 -6 -6 6 174.18 14.8
 5 6 -6 180.28 15.4
 5 6 -6 204.58 15.1
 5 6 -6 191.88 14.7
 -5 -6 6 184.88 15.8
 4 6 -6 68.39 6.6
 4 6 -6 63.69 6.8
 4 6 -6 63.79 7.4
 -4 -6 6 78.19 8.1
 3 6 -6 104.79 8.8
 3 6 -6 84.49 8
 -3 -6 6 94.39 8.8
 -2 -6 6 2.8 2.2
 -1 -6 6 11.4 2.4
 0 -6 6 133.69 9.8
 -1 6 -6 202.18 16
 -1 6 -6 206.88 14.4
 1 -6 6 219.38 14.5
 -2 6 -6 119.29 10.4
 -3 6 -6 103.19 9.5
 -4 6 -6 40 4.5
 -4 6 -6 45.5 5.9
 -5 6 -6 155.38 15.8
 -5 6 -6 164.58 13.7
 -5 6 -6 159.08 12.2
 -6 6 -6 81.59 6.8
 -7 6 -6 9.4 3.2
 -7 6 -6 17.4 4.3
 -7 6 -6 13.7 2.5
 -7 6 -6 7.5 2.4
 -8 6 -6 260.77 19
 -8 6 -6 228.58 17.7
 -9 6 -6 123.99 11.3
 -10 6 -6 1 2.7
 -11 6 -6 -0.2 2.5
 -12 6 -6 4.3 2.1
 7 5 -6 18.7 3.5
 7 5 -6 31.3 4.7
 -7 -5 6 6.2 4.7
 6 5 -6 -1.3 2.4
 6 5 -6 0.1 2.1
 -6 -5 6 -0.1 3.3
 5 5 -6 39.1 5.3
 5 5 -6 40 5.8
 5 5 -6 43.6 5.2
 -5 -5 6 53.19 7
 4 5 -6 127.59 10.9
 4 5 -6 137.09 12.6
 4 5 -6 124.29 10.4
 -4 -5 6 140.59 11.3
 -3 -5 6 156.48 12.1
 -2 -5 6 114.19 9
 -1 -5 6 417.96 28.5
 0 5 -6 0.4 0.8
 0 -5 6 2.5 1.2
 -1 5 -6 112.09 7.7
 -1 5 -6 122.29 9.5
 1 -5 6 104.79 7.8
 -2 5 -6 7.2 2.4
 -3 5 -6 151.18 12.2
 -3 5 -6 153.58 11.3
 -4 5 -6 243.88 18.3
 -4 5 -6 273.37 19.5
 -5 5 -6 252.17 18.6
 -5 5 -6 264.07 19.7
 -6 5 -6 18.9 4.1
 6 -5 6 23.9 3.3
 -7 5 -6 2.2 2.2
 -7 5 -6 6.5 2
 -7 5 -6 1.6 1.8
 7 -5 6 7.2 2.1
 -8 5 -6 151.48 12.3
 -8 5 -6 198.78 13.8
 8 -5 6 143.49 12.3
 -9 5 -6 119.19 10.6
 9 -5 6 111.19 9.8
 -10 5 -6 65.19 7.2
 -11 5 -6 104.89 9.4
 -12 5 -6 148.89 11.4
 -10 -4 6 -2.5 2.6
 -9 -4 6 4.7 2.8
 7 4 -6 284.27 22.7
 -7 -4 6 331.67 27
 -7 -4 6 307.27 23.5
 6 4 -6 15.5 3.4
 6 4 -6 28.2 4.5
 6 4 -6 27.3 4.4
 -6 -4 6 16.6 4.6
 5 4 -6 213.38 15.4
 5 4 -6 189.68 15.1
 5 4 -6 195.18 15.5
 -5 -4 6 222.28 16.2
 -4 -4 6 140.49 11.2
 -3 -4 6 345.77 24.3
 -2 -4 6 113.99 8.8
 -1 -4 6 40.2 3.7
 0 4 -6 421.46 28.2
 -1 4 -6 3.8 1.8
 1 -4 6 5.6 0.8
 -2 4 -6 10.4 2.5
 -2 4 -6 10.1 1.9
 -3 4 -6 37.1 3.8
 -3 4 -6 35 4.4
 -4 4 -6 117.29 10.1
 -4 4 -6 127.39 9.5
 -5 4 -6 91.59 8
 -5 4 -6 82.99 7.3
 5 -4 6 82.29 6.5
 -6 4 -6 122.09 9.4
 -6 4 -6 109.39 8.4
 6 -4 6 98.09 8.3
 -7 4 -6 143.29 12.4
 -7 4 -6 147.89 11.4
 -7 4 -6 161.48 11.8
 7 -4 6 163.68 11.9
 -8 4 -6 3.3 2
 -8 4 -6 2.9 2.4
 -8 4 -6 1.4 1.7
 8 -4 6 2.1 2
 -9 4 -6 51.59 6.1
 9 -4 6 32.2 5.2
 -10 4 -6 87.19 8.5
 -11 4 -6 8.7 2.8
 -10 -3 6 10.6 2.9
 -9 -3 6 0 2.4
 -8 -3 6 30.3 7.5
 -8 -3 6 26.4 4
 7 3 -6 80.89 8.1
 -7 -3 6 79.79 11.4
 -7 -3 6 81.29 9.2
 6 3 -6 222.18 16.7
 -6 -3 6 218.88 20
 -6 -3 6 214.68 17.3
 -5 -3 6 167.28 13.2
 -4 -3 6 764.52 51.89
 -3 -3 6 74.89 6.4
 -2 -3 6 49.1 4.5
 -1 -3 6 927.81 61.69
 0 -3 6 332.57 22.3
 -1 3 -6 119.29 8.5
 -2 3 -6 1138.49 79.19
 -2 3 -6 1231.58 78.59
 -3 3 -6 839.72 55.09
 -3 3 -6 832.02 55.59
 3 -3 6 799.52 54.39
 -4 3 -6 130.69 9.8
 -4 3 -6 124.09 10.1
 -4 3 -6 126.79 8.9
 4 -3 6 123.59 9
 -5 3 -6 177.18 12.5
 -5 3 -6 170.98 13.3
 5 -3 6 178.68 12.6
 -6 3 -6 1116.39 76.29
 -6 3 -6 1127.69 75.49
 6 -3 6 1145.79 75.49
 -7 3 -6 1000 67.89
 -7 3 -6 922.51 66.89
 -7 3 -6 1045.2 67.59
 7 -3 6 1040.3 67.49
 -8 3 -6 75.39 7.6
 -8 3 -6 72.09 6.7
 8 -3 6 83.49 7.5
 -9 3 -6 12.6 2.7
 -9 3 -6 15 3.5
 9 -3 6 15.6 3.4
 9 -3 6 12.2 3.5
 -10 3 -6 20.7 3.1
 -10 3 -6 19.7 3.9
 -11 3 -6 68.79 6.6
 -11 -2 6 76.59 8
 -10 -2 6 1.8 2.3
 -9 -2 6 56.49 6
 -8 -2 6 136.89 15.7
 -8 -2 6 152.18 11.4
 7 2 -6 151.08 13
 -7 -2 6 183.58 17
 -7 -2 6 154.28 12.2
 -7 -2 6 172.98 14.1
 6 2 -6 96.89 9.3
 6 2 -6 105.39 8.9
 -6 -2 6 103.29 9.5
 -6 -2 6 124.89 12.4
 5 2 -6 822.82 56.59
 -5 -2 6 856.11 56.99
 4 2 -6 1547.45 106.99
 -4 -2 6 1678.43 107.39
 3 2 -6 1122.49 76.79
 -3 -2 6 1188.78 77.09
 2 2 -6 250.77 17.6
 -2 -2 6 267.37 17.9
 -1 -2 6 298.57 20.9
 -1 -2 6 330.57 21.3
 0 2 -6 2658.23 168.58
 0 -2 6 2462.45 168.58
 -1 2 -6 923.91 58.39
 1 -2 6 838.42 58.09
 -2 2 -6 204.48 14
 -2 2 -6 201.38 14.5
 2 -2 6 220.18 14.1
 -3 2 -6 443.26 29.5
 3 -2 6 441.26 29.6
 -4 2 -6 7.4 1.4
 4 -2 6 8.2 1.6
 -5 2 -6 17.3 2.4
 5 -2 6 19 2.6
 -6 2 -6 1133.19 74.19
 6 -2 6 1079.39 74.09
 -7 2 -6 174.98 13.6
 -7 2 -6 149.88 12.2
 -7 2 -6 136.09 11.4
 7 -2 6 153.98 12
 -8 2 -6 139.49 10.2
 -8 2 -6 113.29 10.6
 8 -2 6 143.49 11.1
 8 -2 6 124.69 10.8
 -9 2 -6 101.39 9.6
 -9 2 -6 111.09 8.8
 -10 2 -6 186.38 14.8
 -10 2 -6 198.88 14.2
 -11 -1 6 44 4.6
 -10 -1 6 46.2 5.2
 -9 -1 6 2.2 2.2
 -8 -1 6 8.3 4.8
 -8 -1 6 0.4 1.8
 7 1 -6 132.89 11.3
 -7 -1 6 133.49 11.9
 -7 -1 6 126.29 10.5
 -7 -1 6 154.68 14.7
 6 1 -6 8.1 2.4
 -6 -1 6 9.1 2.9
 -6 -1 6 7.1 3.6
 5 1 -6 163.38 12.2
 -5 -1 6 172.88 12.6
 -5 -1 6 155.48 14.5
 4 1 -6 184.58 13.8
 -4 -1 6 203.88 14.2
 3 1 -6 19.2 2.5
 2 1 -6 511.95 35.6
 -2 -1 6 551.94 35.8
 1 1 -6 13.7 1.9
 -1 -1 6 13.1 1.8
 0 1 -6 1069.09 70.29
 0 1 -6 1091.19 70.59
 0 -1 6 1038.9 70.59
 -1 1 -6 609.74 40.1
 1 -1 6 594.04 40.2
 -2 1 -6 369.66 24.8
 2 -1 6 370.46 24.9
 -3 1 -6 90.59 6.7
 3 -1 6 91.79 6.8
 -4 1 -6 7.4 1.5
 4 -1 6 6.4 1.6
 -5 1 -6 96.89 7.8
 5 -1 6 100.49 7.9
 -6 1 -6 24.6 3.4
 6 -1 6 22.5 3.4
 -7 1 -6 480.65 33.1
 -7 1 -6 450.85 33.5
 7 -1 6 513.55 33.8
 7 -1 6 482.65 33.7
 -8 1 -6 3.6 2.5
 -8 1 -6 2.4 2
 8 -1 6 5.9 3
 8 -1 6 4.9 2.7
 -9 1 -6 141.99 12.2
 -9 1 -6 164.18 11.9
 -10 1 -6 76.59 6.9
 -11 1 -6 64.59 5.5
 -11 0 6 25.5 3.7
 -10 0 6 30.4 4.1
 -9 0 6 380.06 26.2
 -9 0 6 371.16 30.5
 8 0 -6 472.05 34
 -8 0 6 487.95 37.5
 -8 0 6 481.15 33
 7 0 -6 67.99 6.9
 -7 0 6 61.89 7.2
 -7 0 6 72.79 6.2
 -7 0 6 74.79 9.8
 6 0 -6 7.2 2.2
 -6 0 6 9.5 2.7
 -6 0 6 11 4
 5 0 -6 147.99 11
 -5 0 6 140.69 11.2
 4 0 -6 9.1 1.9
 -4 0 6 9.9 2.2
 3 0 -6 177.78 12.7
 -3 0 6 180.78 12.9
 2 0 -6 810.92 54.69
 -2 0 6 830.92 54.79
 1 0 -6 275.87 19.2
 1 0 -6 285.67 19.3
 -1 0 6 289.27 19.3
 0 0 -6 2437.26 165.18
 0 0 6 2571.34 165.18
 -1 0 -6 617.04 39.5
 1 0 6 563.14 39.5
 -2 0 -6 977.2 67.19
 2 0 6 1045.5 67.29
 -3 0 -6 2.7 1.2
 3 0 6 0.9 1.2
 -4 0 -6 163.48 11.6
 4 0 6 147.99 11.6
 4 0 6 164.78 11.7
 -5 0 -6 221.18 16.1
 5 0 6 228.18 16.2
 5 0 6 219.58 16.1
 -6 0 -6 254.57 19.1
 6 0 6 295.77 19.8
 6 0 6 263.67 19.7
 -7 0 -6 77.09 7.1
 -7 0 -6 66.89 6.5
 7 0 6 67.99 7.3
 -8 0 -6 31.7 4.3
 -8 0 -6 30.8 4.6
 8 0 6 33.1 5.3
 -9 0 -6 236.18 17.4
 -10 0 -6 0.1 2.1
 -11 0 -6 1.7 1.7
 -11 1 6 4.7 2.1
 -10 1 6 111.19 9.1
 -9 1 6 14.8 2.8
 -9 1 6 15.8 5.4
 8 -1 -6 120.09 10.7
 -8 1 6 122.89 9.6
 -8 1 6 120.39 13.3
 7 -1 -6 8.3 2.6
 -7 1 6 9.2 4.1
 -7 1 6 10.3 3.1
 -7 1 6 7.4 1.8
 6 -1 -6 23 3.6
 -6 1 6 17.5 4.7
 -6 1 6 22.6 3.6
 5 -1 -6 276.67 19.9
 -5 1 6 284.57 20.1
 4 -1 -6 23.3 3.2
 -4 1 6 30.7 3.8
 3 -1 -6 261.87 18.4
 -3 1 6 266.27 18.4
 2 -1 -6 43.9 4
 -2 1 6 45.3 4.1
 1 -1 -6 1185.78 78.49
 1 -1 -6 1161.88 78.59
 -1 1 6 1205.28 78.59
 0 -1 -6 696.53 47.8
 0 -1 -6 731.43 47.7
 0 1 6 720.93 47.8
 -1 -1 -6 14.3 2.2
 -1 -1 -6 14.5 2
 1 1 6 15.5 2.3
 -2 -1 -6 108.59 8.4
 -2 -1 -6 112.09 8.5
 2 1 6 128.89 8.8
 -3 -1 -6 23.3 3.1
 -3 -1 -6 26.3 2.9
 3 1 6 22.5 3.1
 -4 -1 -6 3.8 1.6
 4 1 6 7 2.1
 5 1 6 29.5 4
 -6 -1 -6 159.58 12.1
 6 1 6 160.78 12.9
 -7 -1 -6 667.83 45.9
 7 1 6 682.33 47
 -8 -1 -6 57.99 6.1
 8 1 6 55.79 7.3
 -9 -1 -6 91.79 8.1
 -10 -1 -6 8.3 2.5
 -12 2 6 44.8 4.6
 -11 2 6 1.8 1.9
 -10 2 6 31.6 4.1
 -10 2 6 38.1 8
 9 -2 -6 675.53 47.6
 -9 2 6 699.93 50.79
 -9 2 6 678.53 46.5
 8 -2 -6 426.16 30.5
 -8 2 6 416.76 29.4
 -8 2 6 435.66 33.6
 7 -2 -6 141.39 11.4
 -7 2 6 127.19 11.5
 -7 2 6 130.59 10.4
 -7 2 6 155.88 14.3
 6 -2 -6 92.49 8.1
 -6 2 6 96.19 10.3
 -6 2 6 92.79 8.2
 5 -2 -6 1001 67.29
 -5 2 6 1000.3 67.29
 4 -2 -6 96.69 7.6
 -4 2 6 89.79 7.6
 3 -2 -6 93.79 7.6
 -3 2 6 101.49 7.7
 2 -2 -6 307.27 21.5
 2 -2 -6 315.77 21.6
 -2 2 6 314.27 21.6
 1 -2 -6 226.58 16
 1 -2 -6 234.48 16
 -1 2 6 228.48 16.1
 0 -2 -6 128.69 9
 0 2 6 115.89 9.1
 -1 -2 -6 1399.86 94.59
 -1 -2 -6 1412.16 94.79
 1 2 6 1466.25 94.79
 -2 -2 -6 134.19 9.4
 -2 -2 -6 123.69 9.4
 2 2 6 113.79 9.5
 -3 -2 -6 161.18 12.1
 3 2 6 159.78 12.1
 4 2 6 799.42 54.19
 -5 -2 -6 508.05 35.7
 5 2 6 541.55 36.6
 -6 -2 -6 192.28 14.2
 6 2 6 188.58 15.1
 -7 -2 -6 34.9 4.5
 7 2 6 27.9 5.2
 -8 -2 -6 16.5 3.4
 -9 -2 -6 12.4 3.1
 -10 -2 -6 28.2 3.6
 -12 3 6 6.2 2.2
 -11 3 6 24.5 3.5
 -10 3 6 595.84 46.3
 -10 3 6 653.93 42.5
 9 -3 -6 58.09 6.8
 -9 3 6 63.29 5.8
 -9 3 6 55.79 8.9
 -9 3 6 63.89 6.8
 8 -3 -6 48.4 6.1
 -8 3 6 44.8 5
 -8 3 6 60.09 8.6
 7 -3 -6 190.78 14.3
 -7 3 6 170.28 13.1
 -7 3 6 184.48 16.7
 6 -3 -6 36.7 4.5
 -6 3 6 35.3 4.6
 -6 3 6 36.9 6.8
 5 -3 -6 910.11 61.39
 4 -3 -6 21.4 3.1
 -4 3 6 24.7 3.4
 3 -3 -6 987.9 66.49
 -3 3 6 1001.3 66.59
 2 -3 -6 3.6 1.5
 -2 3 6 1.4 1.5
 1 -3 -6 5.8 1.6
 1 -3 -6 8.3 1.8
 -1 3 6 5.7 1.8
 0 -3 -6 110.79 8.7
 0 3 6 118.09 8.8
 -1 -3 -6 20.4 2.9
 -1 -3 -6 17.3 2.9
 1 3 6 19.1 2.9
 -2 -3 -6 2083.59 142.19
 2 3 6 2204.78 142.29
 -3 -3 -6 1453.45 100.89
 3 3 6 1570.64 101.09
 4 3 6 896.41 60.99
 -5 -3 -6 9.3 2.3
 5 3 6 12.4 3.5
 -6 -3 -6 23.4 3.6
 6 3 6 21.8 4.7
 -7 -3 -6 0.3 2.3
 7 3 6 6.1 4
 -8 -3 -6 21.2 3.8
 -9 -3 -6 137.99 10.8
 -10 -3 -6 57.09 5.2
 -12 4 6 42.9 4.4
 -11 4 6 196.28 14.3
 -10 4 6 15.4 5.4
 -10 4 6 18.9 3.8
 -10 4 6 19 3.2
 9 -4 -6 61.99 7
 -9 4 6 63.99 9.4
 -9 4 6 59.89 7.6
 -9 4 6 58.09 5.9
 8 -4 -6 488.95 34.4
 -8 4 6 475.25 33.3
 -8 4 6 490.05 37.2
 7 -4 -6 209.58 15.6
 -7 4 6 189.68 14.5
 -7 4 6 206.98 18
 6 -4 -6 15.2 3
 -6 4 6 13 4.2
 5 -4 -6 90.49 7.6
 -5 4 6 84.49 7.7
 -5 4 6 89.79 9.4
 4 -4 -6 299.57 21.2
 -4 4 6 298.57 21.2
 3 -4 -6 0.9 1.5
 -3 4 6 1.2 1.6
 2 -4 -6 428.26 29.7
 -2 4 6 438.66 29.8
 1 -4 -6 743.23 48.7
 -1 4 6 700.43 48.7
 0 -4 -6 965.2 64.59
 0 4 6 961.2 64.59
 -1 -4 -6 597.24 40.2
 1 4 6 579.34 40
 -2 -4 -6 28.7 4
 2 4 6 27.5 3.8
 -3 -4 -6 13 3.1
 3 4 6 14.6 3.1
 -4 -4 -6 315.17 23.2
 -4 -4 -6 343.37 24.2
 4 4 6 336.97 24.2
 -5 -4 -6 172.18 13.1
 5 4 6 168.98 14.2
 -6 -4 -6 110.49 9.4
 6 4 6 112.09 10.9
 -7 -4 -6 24.2 4
 -8 -4 -6 10.3 3.1
 -9 -4 -6 22.4 3.4
 -12 5 6 2.8 1.7
 -11 5 6 93.29 8.7
 -11 5 6 102.89 8
 -10 5 6 23.3 6.1
 -10 5 6 38.2 5.3
 -10 5 6 25.9 3.7
 9 -5 -6 14.8 3.7
 -9 5 6 14.5 5.2
 -9 5 6 19.6 4.4
 -9 5 6 14.1 2.9
 8 -5 -6 12 3.2
 -8 5 6 13.4 2.6
 -8 5 6 16.1 5.3
 7 -5 -6 17.7 3.5
 -7 5 6 21.5 5.6
 6 -5 -6 102.69 8.8
 -6 5 6 112.99 11.2
 -6 5 6 83.69 8.6
 5 -5 -6 2.8 1.8
 -5 5 6 0.8 1.9
 -5 5 6 3.3 3
 4 -5 -6 245.78 17.3
 -4 5 6 230.48 17.2
 3 -5 -6 37.7 4.2
 -3 5 6 35.1 4.2
 2 -5 -6 131.49 10
 -2 5 6 125.29 10.1
 1 -5 -6 4 2
 -1 5 6 2.4 1.8
 0 -5 -6 92.09 8.1
 0 5 6 96.39 7.9
 -1 -5 -6 184.78 14.1
 1 5 6 184.48 13.7
 -2 -5 -6 173.18 13.6
 2 5 6 177.48 13.5
 -3 -5 -6 6.1 2.8
 3 5 6 1.3 2.3
 -4 -5 -6 59.49 6
 -4 -5 -6 63.09 7
 4 5 6 56.59 6.9
 -5 -5 -6 -1.3 2.1
 5 5 6 2.9 3
 -6 -5 -6 48.7 5.6
 6 5 6 51.99 7.1
 -7 -5 -6 243.68 18
 -8 -5 -6 16 3.2
 -9 -5 -6 2.4 2
 9 5 6 2.5 2
 -12 6 6 54.09 5.4
 -12 6 6 57.39 4.9
 -11 6 6 0.2 3.5
 -11 6 6 4.4 1.9
 -11 6 6 5 2.7
 -10 6 6 37.6 4.3
 -10 6 6 29.3 7.1
 -10 6 6 40 5.9
 9 -6 -6 21.7 4.2
 -9 6 6 21.5 6
 -9 6 6 20.5 3.2
 8 -6 -6 2.6 2.4
 -8 6 6 4.2 1.8
 -8 6 6 8.1 4.5
 7 -6 -6 0.9 1.9
 -7 6 6 1 1.4
 -7 6 6 -0.1 2.9
 6 -6 -6 30.1 4.5
 -6 6 6 41.6 7.4
 5 -6 -6 255.67 19.1
 -5 6 6 267.57 21.5
 4 -6 -6 300.87 21.8
 -4 6 6 307.27 23.8
 3 -6 -6 548.55 35.8
 -3 6 6 489.95 35.6
 2 -6 -6 50.89 5.3
 -2 6 6 46.1 5.1
 1 -6 -6 578.04 39.8
 -1 6 6 575.14 39.5
 0 -6 -6 2.1 2.2
 0 6 6 1.7 1.6
 -1 -6 -6 464.05 31.5
 1 6 6 426.46 30.9
 -2 -6 -6 21.2 4
 2 6 6 16.1 3.3
 -3 -6 -6 67.29 6.4
 -3 -6 -6 69.59 7.4
 3 6 6 62.69 7
 3 6 6 66.19 6.1
 -4 -6 -6 16.6 3.6
 -4 -6 -6 26.7 5.1
 4 6 6 20.7 3.3
 4 6 6 21.5 4.5
 -5 -6 -6 2.6 2.3
 5 6 6 2.7 3.5
 -6 -6 -6 143.99 11.6
 -7 -6 -6 51.29 5.8
 7 6 6 57.29 6.4
 -8 -6 -6 17.9 3.2
 8 6 6 20.2 3.5
 -12 7 6 -0.6 1.8
 -12 7 6 3.3 1.3
 -11 7 6 18.6 3.8
 -11 7 6 16.6 5
 -11 7 6 11.4 2.4
 -10 7 6 51.39 8.7
 -10 7 6 51.19 7.2
 -10 7 6 57.69 5.4
 -9 7 6 14.1 2.8
 -9 7 6 19.7 6.1
 8 -7 -6 75.29 7.9
 -8 7 6 82.29 10.8
 -8 7 6 72.39 6.8
 7 -7 -6 2.2 2.3
 -7 7 6 8.5 4.5
 -7 7 6 1.1 1.7
 6 -7 -6 37.3 5.1
 -6 7 6 46.6 7.4
 -6 7 6 38.4 7.4
 5 -7 -6 1.8 1.9
 -5 7 6 -0.3 2.5
 4 -7 -6 304.57 22.1
 -4 7 6 307.17 24.4
 3 -7 -6 199.78 15.1
 -3 7 6 196.88 17
 2 -7 -6 175.48 12.5
 -2 7 6 177.48 14.3
 -2 7 6 125.79 13.6
 1 -7 -6 453.25 31.4
 -1 7 6 433.26 30.8
 0 -7 -6 399.56 28
 0 7 6 380.76 27.5
 -1 -7 -6 189.28 15.2
 1 7 6 208.08 14
 1 7 6 179.98 14.6
 -2 -7 -6 2 2
 -2 -7 -6 5.7 3
 2 7 6 4 3.9
 2 7 6 2.6 2.6
 2 7 6 4.2 2.3
 2 7 6 3 1.8
 -3 -7 -6 462.35 32.7
 -3 -7 -6 471.95 33.7
 3 7 6 443.36 33.3
 3 7 6 460.55 33
 3 7 6 515.85 32.4
 -4 -7 -6 22.2 3.8
 4 7 6 17.5 2.9
 4 7 6 21 4.2
 -5 -7 -6 39.3 5.1
 5 7 6 36.8 5.4
 -6 -7 -6 2.9 2.4
 6 7 6 1.3 2.5
 -7 -7 -6 66.89 6.4
 7 7 6 64.99 6.6
 -8 -7 -6 -3.6 1.7
 -12 8 6 125.79 10
 -11 8 6 13.6 4.8
 -11 8 6 13.3 3.6
 -11 8 6 11.9 2.1
 -10 8 6 8.9 3.7
 -10 8 6 7.1 2.1
 -10 8 6 5.2 3.9
 -9 8 6 0.2 1.5
 -9 8 6 0.9 3.8
 8 -8 -6 59.89 7.2
 -8 8 6 53.49 9.4
 -8 8 6 69.39 6.2
 7 -8 -6 20.3 4.4
 -7 8 6 40.7 4.2
 -7 8 6 25.9 6.9
 6 -8 -6 30.3 4.7
 -6 8 6 24.4 6.6
 5 -8 -6 60.99 6.6
 -5 8 6 58.79 8.2
 -5 8 6 63.49 9
 4 -8 -6 250.97 17.6
 -4 8 6 282.27 20.8
 -4 8 6 207.08 18.8
 -4 8 6 176.58 18.4
 3 -8 -6 347.37 23.7
 -3 8 6 358.96 26.6
 -3 8 6 262.07 24.4
 2 -8 -6 761.42 48.7
 -2 8 6 696.93 50.69
 -2 8 6 649.93 49.5
 1 -8 -6 62.09 6.4
 -1 8 6 42.6 4.4
 -1 8 6 37.9 6.8
 0 -8 -6 9 3.3
 0 8 6 8.1 1.9
 0 8 6 3.2 4.2
 -1 -8 -6 360.66 24.1
 1 8 6 313.17 22.5
 1 8 6 297.37 24.5
 -2 -8 -6 99.99 8.8
 2 8 6 60.69 9
 2 8 6 71.89 6.7
 2 8 6 86.79 7.7
 -3 -8 -6 12.1 3.3
 -3 -8 -6 14.6 4.3
 3 8 6 17.4 2.9
 3 8 6 15.8 3.7
 -4 -8 -6 26.9 4.4
 4 8 6 25.9 4.4
 4 8 6 27.7 3.6
 -5 -8 -6 1.6 2.6
 5 8 6 2.4 2.5
 -6 -8 -6 2.2 2.4
 6 8 6 3.8 2.5
 -7 -8 -6 6.2 2.2
 7 8 6 4.8 2.3
 -11 9 6 40.8 7.1
 -11 9 6 39.9 5.4
 -11 9 6 37.9 3.6
 -10 9 6 13.7 5.2
 -10 9 6 13.8 4
 -10 9 6 18.7 2.7
 -9 9 6 0.7 3.6
 -9 9 6 3 1.7
 -8 9 6 56.09 5.8
 -8 9 6 56.79 10.4
 -8 9 6 60.59 9.6
 7 -9 -6 204.38 15.7
 -7 9 6 223.38 19.4
 -7 9 6 179.48 17.1
 -7 9 6 166.48 14.2
 6 -9 -6 1.4 2.5
 -6 9 6 10.1 5.1
 -6 9 6 -0.4 3.1
 5 -9 -6 1.7 2.4
 -5 9 6 4.7 4.4
 -5 9 6 0.5 3.1
 4 -9 -6 187.08 15.9
 -4 9 6 215.08 14.9
 -4 9 6 179.18 18.4
 -4 9 6 225.28 17.9
 -4 9 6 205.48 17.8
 3 -9 -6 26.4 4.8
 -3 9 6 26.7 6.2
 -3 9 6 25.1 6.3
 -3 9 6 31.5 3.8
 -3 9 6 26 6.1
 2 -9 -6 205.38 15.6
 -2 9 6 183.58 17.3
 -2 9 6 191.28 17
 -2 9 6 197.68 16.9
 -2 9 6 184.38 13.9
 1 -9 -6 558.74 42.9
 -1 9 6 674.73 44.7
 -1 9 6 592.44 41.6
 -1 9 6 631.44 44.3
 0 -9 -6 95.19 9.3
 0 9 6 92.89 10.6
 0 9 6 90.69 7.7
 -1 -9 -6 9.3 3.4
 1 9 6 5.1 4.2
 1 9 6 5.4 2
 -2 -9 -6 455.75 33.7
 2 9 6 493.95 33.1
 2 9 6 484.15 32.4
 2 9 6 437.16 34.3
 3 9 6 1.7 2.6
 3 9 6 -0.1 1.7
 -4 -9 -6 8.5 3.4
 4 9 6 12.5 2.7
 4 9 6 12.7 3.4
 -5 -9 -6 91.39 8.6
 5 9 6 98.89 8.6
 -6 -9 -6 4.6 2.4
 6 9 6 5.9 2.5
 -11 10 6 1.2 2.3
 -10 10 6 86.49 11.1
 -10 10 6 99.39 7.2
 -10 10 6 94.79 9
 -9 10 6 27.8 7
 -9 10 6 19.9 4.5
 -9 10 6 17.5 2.7
 -8 10 6 4.3 1.9
 -8 10 6 0.9 3.8
 -8 10 6 -0.1 4
 7 -10 -6 32.8 6.6
 -7 10 6 36.6 6.9
 -7 10 6 29.9 7.6
 -7 10 6 26.4 3.9
 6 -10 -6 118.69 11.5
 -6 10 6 124.09 14.8
 -6 10 6 149.29 13.9
 5 -10 -6 218.88 17.7
 -5 10 6 251.57 21.6
 -5 10 6 210.58 19.4
 4 -10 -6 3.8 2.8
 -4 10 6 3.9 2.1
 -4 10 6 2.6 3.6
 -4 10 6 8.9 4.8
 -4 10 6 -0.2 3.8
 3 -10 -6 87.49 9.5
 -3 10 6 72.99 11.3
 -3 10 6 109.69 8.4
 -3 10 6 128.79 12.1
 -3 10 6 116.79 12.4
 2 -10 -6 5.8 3.1
 -2 10 6 12.1 4.8
 -2 10 6 12.3 2.6
 -2 10 6 12.2 5.3
 1 -10 -6 32.1 5.9
 -1 10 6 49.99 5
 -1 10 6 52.49 8.3
 -1 10 6 51.39 8.2
 0 -10 -6 13.6 4.1
 0 10 6 11.3 2.6
 0 10 6 3.7 4.6
 -1 -10 -6 31.8 5.6
 1 10 6 46.5 5.1
 1 10 6 49.3 7.6
 2 10 6 5.4 2.2
 2 10 6 9 3.3
 2 10 6 10.6 4.9
 3 10 6 1.9 2.6
 3 10 6 -0.3 1.9
 4 10 6 4.6 2.7
 -5 -10 -6 -4.3 2.5
 5 10 6 -1.4 2.2
 -11 11 6 3.9 2.2
 -10 11 6 1 3.4
 -10 11 6 1.4 2.2
 -9 11 6 -0.3 1.3
 -9 11 6 -0.5 2.5
 -9 11 6 -0.3 3.8
 -8 11 6 25.4 6.1
 -8 11 6 26.8 3.4
 -8 11 6 27.6 7.3
 -7 11 6 64.89 8.9
 -7 11 6 58.99 5.4
 -7 11 6 37.8 8.7
 -6 11 6 41.9 9
 -6 11 6 67.29 9.1
 5 -11 -6 0.8 2.6
 -5 11 6 -0.2 1.9
 -5 11 6 1.3 3.8
 -5 11 6 -1.5 3.9
 4 -11 -6 208.38 16.9
 -4 11 6 212.98 19.2
 -4 11 6 214.88 19
 -4 11 6 206.38 15.6
 -4 11 6 210.88 19.9
 3 -11 -6 88.89 8.7
 -3 11 6 75.19 10.7
 -3 11 6 70.19 9.9
 -3 11 6 78.69 7.1
 2 -11 -6 33.1 5.4
 -2 11 6 36.3 4.4
 -2 11 6 31.8 7.2
 -2 11 6 26.4 6.6
 1 -11 -6 24.6 5.5
 -1 11 6 37.7 7.4
 -1 11 6 33 4.3
 0 11 6 108.39 12.3
 0 11 6 109.09 9.1
 1 11 6 11.4 2.8
 1 11 6 12.1 5
 2 11 6 17.5 5.2
 2 11 6 14.8 2.9
 3 11 6 6.5 2.2
 -10 12 6 73.49 6.7
 -9 12 6 18.1 4.7
 -9 12 6 20.1 3.7
 -9 12 6 15 5.1
 -8 12 6 89.49 10.8
 -8 12 6 123.19 8.2
 -8 12 6 109.29 9.7
 -7 12 6 241.08 20.6
 -7 12 6 182.68 18.1
 -7 12 6 216.08 15.2
 -6 12 6 174.38 16.9
 -6 12 6 189.68 18.2
 -5 12 6 59.19 9.3
 -5 12 6 65.79 6.2
 -4 12 6 28.9 6.8
 -4 12 6 32.6 4.3
 -4 12 6 33.1 7.4
 -3 12 6 57.19 9
 -3 12 6 43.1 5.4
 -3 12 6 66.09 10.2
 -2 12 6 17.4 5.3
 -2 12 6 19.2 6.6
 -2 12 6 17.9 3.3
 -1 12 6 88.89 7.9
 -1 12 6 91.79 11.5
 0 12 6 59.19 6.2
 0 12 6 71.99 9.7
 1 12 6 38.7 6.9
 1 12 6 41 4.8
 2 12 6 5.9 2.1
 2 12 6 7.2 4.2
 3 12 6 28.7 3.3
 -9 13 6 12.7 3.6
 -9 13 6 6.6 2.3
 -9 13 6 4 4.7
 -8 13 6 12.2 4.9
 -8 13 6 3.7 3.4
 -7 13 6 5 1.5
 -7 13 6 9.4 4.7
 -7 13 6 0.5 3.5
 -6 13 6 41.5 7.4
 -6 13 6 36.1 8.2
 -6 13 6 42.8 4.1
 -5 13 6 3.3 4.2
 -5 13 6 3.5 2
 -4 13 6 30.9 6.6
 -4 13 6 22.8 3.6
 -3 13 6 214.28 17
 -3 13 6 255.37 20.5
 -3 13 6 242.18 20
 -2 13 6 2 2.1
 -2 13 6 -3.3 4.6
 -2 13 6 -0.1 3.6
 -1 13 6 19.2 5.9
 -1 13 6 21 3.4
 0 13 6 10.4 4.8
 0 13 6 18.8 3
 1 13 6 5.6 2
 1 13 6 -3.1 3.7
 2 13 6 2.6 1.5
 -8 14 6 3.3 2.8
 -7 14 6 1.2 3.1
 -6 14 6 24.7 5.3
 -5 14 6 3.8 2
 -5 14 6 2.7 3.4
 -4 14 6 41.8 4.7
 -4 14 6 48.6 7.1
 -3 14 6 60.49 8.3
 -3 14 6 74.99 6.2
 -2 14 6 29.3 3.7
 -2 14 6 32.3 6.2
 -1 14 6 2.2 3.5
 -1 14 6 -0.4 1.6
 0 14 6 -0.4 1.5
 0 14 6 4.5 3.3
 -7 15 6 27.2 4.5
 -6 15 6 1.4 2.7
 -5 15 6 13.2 2.3
 -5 15 6 11.4 3.6
 -4 15 6 47.5 4.4
 -4 15 6 40.7 5.9
 -3 15 6 4 1.7
 -2 15 6 22.8 2.9
 -3 16 -7 1.1 1.5
 -4 16 -7 0.7 2.8
 -4 16 -7 2.5 1.6
 -5 16 -7 26.8 4.5
 -5 16 -7 24.9 3.1
 -6 16 -7 2.3 2.7
 -6 16 -7 6 1.8
 0 15 -7 4 2.8
 -1 15 -7 6.9 3.5
 -1 15 -7 11.5 3.4
 -2 15 -7 5 3
 -2 15 -7 2 1.8
 -3 15 -7 3.8 2
 -3 15 -7 6.3 3.1
 -3 15 -7 5 3.7
 -4 15 -7 3.9 2.8
 -4 15 -7 2.7 2
 -4 15 -7 0.9 3.4
 -5 15 -7 18.9 4.9
 -5 15 -7 17.9 3
 -6 15 -7 -0.3 3.1
 -6 15 -7 0.9 1.9
 -7 15 -7 33 3.9
 -7 15 -7 32.9 3.8
 -7 15 -7 27.7 5.2
 -8 15 -7 3.8 2
 -8 15 -7 12 3.4
 -8 15 -7 6.7 2
 2 14 -7 -2 2.3
 1 14 -7 7.3 3
 1 14 -7 9.9 3.5
 0 14 -7 21.5 4.2
 0 14 -7 21.7 4.6
 -1 14 -7 29.9 3.8
 -1 14 -7 32.1 5.4
 -1 14 -7 34.9 5.7
 -2 14 -7 38.6 5.9
 -2 14 -7 31.4 5.7
 -2 14 -7 37.1 6.5
 -2 14 -7 35.5 4.3
 -3 14 -7 7 3.6
 -3 14 -7 1.2 4.1
 -3 14 -7 1.8 2.1
 -4 14 -7 13.5 5
 -4 14 -7 16.1 4.4
 -4 14 -7 17 3.2
 -5 14 -7 4.6 2.4
 -5 14 -7 5.4 4.1
 -6 14 -7 2.8 2.4
 -6 14 -7 6.9 4.2
 -6 14 -7 9.2 2.7
 -7 14 -7 25.2 5.7
 -7 14 -7 26.7 3.8
 -7 14 -7 26.6 3.9
 -8 14 -7 6 3.6
 -8 14 -7 2.8 2.1
 -8 14 -7 4.8 2.2
 -9 14 -7 2.3 3
 -9 14 -7 1.3 1.7
 3 13 -7 8.1 3
 3 13 -7 13.5 3.2
 2 13 -7 -1.4 2.9
 2 13 -7 1.8 2.7
 1 13 -7 23 4.7
 1 13 -7 16.7 4
 0 13 -7 2.6 3.1
 0 13 -7 -2.6 3.2
 -1 13 -7 17.2 4.7
 -1 13 -7 15.9 4.3
 -1 13 -7 13.7 3.1
 -2 13 -7 98.59 10.3
 -2 13 -7 92.19 8.6
 -2 13 -7 105.99 10.6
 -2 13 -7 103.39 11.3
 -3 13 -7 20.8 3.8
 -3 13 -7 20.4 5.8
 -3 13 -7 25.1 5.4
 -4 13 -7 -1.9 2
 -4 13 -7 0.7 4
 -4 13 -7 0.1 3.4
 -5 13 -7 21.7 3.9
 -5 13 -7 16.7 5.8
 -5 13 -7 19.4 3.7
 -5 13 -7 22.4 5.2
 -6 13 -7 9.4 2.9
 -6 13 -7 6.9 2.8
 -6 13 -7 10.5 5.3
 -7 13 -7 28 4.3
 -7 13 -7 25.1 4.2
 -7 13 -7 39.2 7
 -8 13 -7 53.59 8.2
 -8 13 -7 56.59 6
 -8 13 -7 63.89 6.3
 -9 13 -7 59.69 6
 -10 13 -7 19.1 2.9
 4 12 -7 2.6 2.5
 4 12 -7 1 2.4
 3 12 -7 27.8 4.9
 3 12 -7 27.9 4.5
 2 12 -7 16.2 4
 2 12 -7 5.5 3.5
 1 12 -7 2.3 3.4
 1 12 -7 1.5 2.5
 1 12 -7 4.4 3.3
 0 12 -7 1.7 3.3
 0 12 -7 -0.1 2.3
 0 12 -7 -0.3 3.1
 0 12 -7 1.8 2
 -1 12 -7 2.3 4.1
 -1 12 -7 4.2 3.5
 -1 12 -7 7.8 3.6
 -1 12 -7 4.8 2.5
 -2 12 -7 8.3 3.8
 -2 12 -7 7.8 4.8
 -2 12 -7 7.7 3.9
 -2 12 -7 16.9 3.3
 -3 12 -7 73.19 10.2
 -3 12 -7 92.59 9.8
 -3 12 -7 68.19 7.5
 -4 12 -7 170.98 13.5
 -4 12 -7 169.18 15.1
 -4 12 -7 160.68 13.2
 -4 12 -7 171.88 16.5
 -5 12 -7 81.19 8.4
 -5 12 -7 112.79 12.3
 -5 12 -7 85.19 8.4
 -6 12 -7 63.09 7
 -6 12 -7 85.59 10.9
 -6 12 -7 62.09 7.1
 -7 12 -7 -1.8 3.8
 -7 12 -7 -0.3 2.4
 -7 12 -7 -1.2 2.2
 -8 12 -7 17.5 3.6
 -8 12 -7 19.4 3.7
 -8 12 -7 22.4 6
 -9 12 -7 42 5.1
 -10 12 -7 -0.3 2
 5 11 -7 3.4 2.5
 5 11 -7 5.2 2.6
 4 11 -7 61.29 6.6
 4 11 -7 48.2 6.6
 3 11 -7 55.49 7.6
 3 11 -7 60.89 6.9
 2 11 -7 1.8 3.4
 2 11 -7 1 2.6
 2 11 -7 2.9 2.6
 1 11 -7 107.49 9.8
 1 11 -7 102.59 10.3
 1 11 -7 124.19 11.1
 0 11 -7 41.9 6.3
 0 11 -7 38.7 5.9
 0 11 -7 37.9 4.7
 0 11 -7 38.5 5.3
 -1 11 -7 4.8 3.4
 -1 11 -7 0.6 3.9
 -1 11 -7 -0.6 2.7
 -1 11 -7 0.3 2.3
 -1 11 -7 0.1 2.1
 -2 11 -7 107.79 10.9
 -2 11 -7 129.09 10.4
 -2 11 -7 140.79 13.5
 -2 11 -7 118.19 11.6
 -3 11 -7 113.19 11.4
 -3 11 -7 119.49 10.1
 -3 11 -7 125.29 13.1
 -3 11 -7 106.99 9.6
 -4 11 -7 2.4 2.6
 -4 11 -7 2.5 3.6
 -4 11 -7 0.6 4.2
 -4 11 -7 -0.4 2.2
 -5 11 -7 240.08 16.6
 -5 11 -7 200.18 15.5
 -5 11 -7 203.38 17.8
 -5 11 -7 216.88 16.4
 -6 11 -7 55.09 6.5
 -6 11 -7 60.19 6.8
 -6 11 -7 50.79 9.2
 -7 11 -7 10.3 3.1
 -7 11 -7 7.6 5.2
 -7 11 -7 7.9 3.1
 -8 11 -7 2.2 2.8
 -8 11 -7 2.9 4.2
 -8 11 -7 -0.2 2.4
 -9 11 -7 -0.3 2.2
 -9 11 -7 -1.1 2.5
 -10 11 -7 2.4 2.2
 -10 11 -7 4.4 2.3
 -11 11 -7 14.6 2.6
 -11 11 -7 11 2.6
 6 10 -7 -1.2 2.2
 5 10 -7 9.7 3.4
 5 10 -7 8.3 3
 4 10 -7 8.4 3.4
 4 10 -7 3.7 3.4
 3 10 -7 1.8 2.7
 3 10 -7 2 2.7
 3 10 -7 1.1 3.1
 2 10 -7 202.28 15.6
 2 10 -7 191.68 14.9
 2 10 -7 182.78 15.1
 -2 -10 7 167.58 15
 1 10 -7 4.3 3.1
 1 10 -7 4.4 2.5
 1 10 -7 -0.2 2.4
 -1 -10 7 4 3
 0 10 -7 3.7 2.5
 0 10 -7 4.2 2.7
 0 10 -7 0.7 2.5
 0 10 -7 4 2.3
 0 -10 7 1.8 2.5
 -1 10 -7 2.2 2.8
 -1 10 -7 1 2.2
 -1 10 -7 -1.9 2.7
 -1 10 -7 0.1 4
 -1 10 -7 2.7 2.3
 -2 10 -7 175.98 15.9
 -2 10 -7 159.08 16.7
 -2 10 -7 211.18 15.8
 -2 10 -7 222.48 17.1
 -2 10 -7 170.28 14.3
 -3 10 -7 9.3 3.8
 -3 10 -7 19.1 6.4
 -3 10 -7 14.5 4.6
 -3 10 -7 7 2.9
 -3 10 -7 7.8 4.6
 -3 10 -7 6.6 2.7
 -4 10 -7 365.46 27.8
 -4 10 -7 241.08 21.7
 -4 10 -7 275.07 21
 -4 10 -7 297.07 23.4
 -4 10 -7 286.67 21.8
 -4 10 -7 349.67 24.9
 -4 10 -7 303.77 25
 -5 10 -7 175.48 17.1
 -5 10 -7 196.38 14.6
 -5 10 -7 205.48 18.2
 -5 10 -7 211.28 14.7
 -5 10 -7 180.68 13.7
 -5 10 -7 185.88 16
 -5 10 -7 166.28 18.4
 -6 10 -7 45.2 4.9
 -6 10 -7 58.39 5.9
 -6 10 -7 48.1 8.8
 -6 10 -7 40.6 9
 -6 10 -7 54.59 6.2
 -7 10 -7 -1 2.3
 -7 10 -7 -0.7 2.6
 -7 10 -7 -3.3 4.1
 -8 10 -7 199.18 16
 -8 10 -7 210.98 15.5
 -8 10 -7 202.98 16
 -9 10 -7 1.3 2.7
 -9 10 -7 3.1 2.7
 -10 10 -7 24.9 4.2
 -10 10 -7 14.9 3.5
 -11 10 -7 22.6 3.6
 -11 10 -7 27.6 4.1
 7 9 -7 -0.3 2.5
 6 9 -7 1.9 2.6
 6 9 -7 2.4 2.8
 5 9 -7 -0.4 2.8
 5 9 -7 0.6 2.5
 4 9 -7 56.89 7.4
 4 9 -7 52.69 6.6
 4 9 -7 57.09 6.7
 3 9 -7 138.39 12.4
 3 9 -7 147.59 13.2
 3 9 -7 154.08 12.6
 -3 -9 7 170.38 13.3
 2 9 -7 4.1 2.6
 2 9 -7 2.6 2.4
 2 9 -7 1.5 2.8
 -2 -9 7 4.5 3.2
 1 9 -7 45.1 5.8
 1 9 -7 43.2 6
 1 9 -7 43.6 5.5
 -1 -9 7 39.7 5.5
 0 9 -7 65.79 6.7
 0 9 -7 73.39 7.4
 0 9 -7 74.79 6.7
 0 9 -7 65.39 7.2
 0 -9 7 75.79 6.9
 -1 9 -7 34 4.5
 -1 9 -7 24.8 4.5
 -1 9 -7 30 6.4
 -1 9 -7 33.5 5.1
 -1 9 -7 35.2 4.5
 -2 9 -7 4.4 4.1
 -2 9 -7 6.3 2.9
 -2 9 -7 8.3 4.4
 -2 9 -7 6.3 2.6
 -2 9 -7 3.2 3.2
 -2 9 -7 5.6 2.3
 -3 9 -7 0.6 3.5
 -3 9 -7 5 2.4
 -3 9 -7 -0.1 2.9
 -3 9 -7 3.9 1.7
 -3 9 -7 4.3 4
 -3 9 -7 4.5 2.2
 -3 9 -7 1.1 2.7
 -4 9 -7 6.6 4.4
 -4 9 -7 2.6 1.7
 -4 9 -7 3.1 2.9
 -4 9 -7 0.6 2.1
 -4 9 -7 4.1 2.3
 -4 9 -7 5.8 3.8
 -4 9 -7 3 4
 -5 9 -7 322.37 22.3
 -5 9 -7 266.27 26.1
 -5 9 -7 375.76 23.1
 -5 9 -7 321.97 24.1
 -5 9 -7 275.27 25.3
 -5 9 -7 359.36 23.2
 -5 9 -7 333.87 26.2
 -6 9 -7 43.9 8
 -6 9 -7 30.4 6.9
 -6 9 -7 42.9 8.7
 -6 9 -7 42.7 5.1
 -6 9 -7 39.9 5.2
 -6 9 -7 34.8 4.3
 -7 9 -7 1.9 4.4
 -7 9 -7 0 2.6
 -7 9 -7 2.1 2
 -7 9 -7 1.5 2.2
 -7 9 -7 1.3 2.6
 -8 9 -7 32.1 4.4
 -8 9 -7 32.8 5.2
 -8 9 -7 31.8 4.9
 -9 9 -7 26.6 4.8
 -9 9 -7 27.2 4.7
 -10 9 -7 10.1 3.4
 -10 9 -7 13.7 3.8
 -11 9 -7 3.7 2.6
 7 8 -7 28.3 4.5
 6 8 -7 2.1 2.9
 6 8 -7 -1.2 2.5
 -6 -8 7 -0.2 3.7
 5 8 -7 46.9 5.9
 5 8 -7 37.4 5.9
 4 8 -7 6.1 3
 4 8 -7 3.5 2.6
 4 8 -7 5.5 3.4
 -4 -8 7 9.1 3.7
 3 8 -7 41.5 5.6
 3 8 -7 35.7 5.8
 3 8 -7 50.59 5.8
 -3 -8 7 47.5 6.3
 2 8 -7 23.2 3.9
 2 8 -7 23.8 4.5
 -2 -8 7 25.1 4.5
 1 8 -7 121.89 9.9
 1 8 -7 98.29 9.2
 1 8 -7 95.39 9.7
 -1 -8 7 134.49 9.9
 0 8 -7 605.04 41.1
 0 -8 7 576.44 40.4
 -1 8 -7 136.39 11.2
 -1 8 -7 137.39 11.7
 -1 8 -7 119.09 13.7
 -2 8 -7 5.8 3
 -2 8 -7 3.3 3.6
 -2 8 -7 0.5 2.2
 -3 8 -7 51.49 6.2
 -3 8 -7 31.4 7.1
 -3 8 -7 37.3 6.2
 -4 8 -7 164.58 14.4
 -4 8 -7 200.98 17.3
 -4 8 -7 166.88 15.5
 -5 8 -7 36.2 4.6
 -5 8 -7 39.6 4.5
 -5 8 -7 36.3 3.7
 -5 8 -7 22.6 5.5
 -5 8 -7 34.1 6.8
 -5 8 -7 23.1 6.2
 -6 8 -7 60.39 6.9
 -6 8 -7 72.49 6
 -6 8 -7 81.59 9.5
 -6 8 -7 55.49 7
 -6 8 -7 57.09 9.2
 -6 8 -7 53.99 6.1
 -7 8 -7 16.5 3.2
 -7 8 -7 17.9 5
 -7 8 -7 13.8 3.1
 -7 8 -7 15.8 4
 -7 8 -7 16.5 3.9
 -8 8 -7 212.68 16.2
 -8 8 -7 197.98 16.4
 -8 8 -7 202.58 15.1
 -9 8 -7 70.99 7.5
 -9 8 -7 66.09 7.9
 -10 8 -7 168.48 13.2
 -10 8 -7 135.29 12.3
 -11 8 -7 263.47 19.9
 -12 8 -7 52.59 5.3
 7 7 -7 0.7 2.6
 6 7 -7 132.99 11.4
 6 7 -7 137.49 12
 5 7 -7 41 6
 5 7 -7 34.8 5.1
 5 7 -7 36.4 5.3
 -5 -7 7 34.7 6
 4 7 -7 300.47 22.9
 4 7 -7 317.67 23.6
 4 7 -7 340.07 23.1
 -4 -7 7 303.17 23.7
 3 7 -7 3.1 2.2
 3 7 -7 2.3 2.7
 3 7 -7 4.7 2.4
 -3 -7 7 2.3 2.9
 2 7 -7 407.46 29.6
 2 7 -7 466.75 29.7
 2 7 -7 420.76 30
 -2 -7 7 391.96 29.8
 1 7 -7 197.08 14.9
 -1 -7 7 193.68 14.7
 0 7 -7 315.67 26.8
 0 -7 7 361.26 23.7
 -1 7 -7 26.7 6.2
 -1 7 -7 23.9 4.4
 -2 7 -7 53.49 8.2
 -2 7 -7 69.59 7.6
 -2 7 -7 70.99 4.9
 -3 7 -7 131.59 13.3
 -3 7 -7 138.89 12.2
 -4 7 -7 56.49 7.3
 -4 7 -7 43.4 5.9
 -4 7 -7 64.79 8.3
 -5 7 -7 437.16 28.9
 -5 7 -7 443.76 31.5
 -5 7 -7 382.16 32.1
 -6 7 -7 9.5 2.8
 -6 7 -7 21.1 3.2
 -6 7 -7 39.4 6.3
 -7 7 -7 74.79 6.7
 -7 7 -7 61.89 6.6
 -7 7 -7 61.79 7.5
 -7 7 -7 84.89 9.5
 -7 7 -7 80.79 6.5
 -8 7 -7 465.65 32
 -8 7 -7 411.46 31.2
 -9 7 -7 139.09 11.8
 -9 7 -7 117.69 11
 -10 7 -7 77.79 8.4
 -11 7 -7 0.9 2.6
 -12 7 -7 9.1 2.5
 8 6 -7 8.9 3.3
 7 6 -7 1.6 2.8
 -7 -6 7 4.1 4.5
 6 6 -7 25.7 4.6
 6 6 -7 15.9 3.6
 5 6 -7 3.9 2.6
 5 6 -7 8.3 3.4
 5 6 -7 9 3
 -5 -6 7 7.7 3.8
 4 6 -7 254.67 19.6
 4 6 -7 277.07 20.4
 4 6 -7 286.37 19.9
 -4 -6 7 260.87 20.6
 3 6 -7 194.98 14.7
 3 6 -7 195.78 14.7
 3 6 -7 182.48 15
 -3 -6 7 211.18 15.4
 -2 -6 7 2.6 2
 -1 -6 7 -0.7 1.5
 0 -6 7 242.28 16.9
 -1 6 -7 109.29 9.2
 -1 6 -7 94.09 7.1
 -2 6 -7 185.78 14.9
 -3 6 -7 3105.29 206.68
 -4 6 -7 257.67 19.2
 -4 6 -7 281.67 20.8
 -5 6 -7 135.39 11.1
 -5 6 -7 155.98 12.9
 -5 6 -7 137.19 13.7
 -6 6 -7 133.49 14.3
 -6 6 -7 176.28 14.5
 -6 6 -7 156.48 12.9
 -6 6 -7 144.89 11.2
 -6 6 -7 157.28 13.4
 -7 6 -7 60.99 6
 -7 6 -7 78.69 7.5
 -7 6 -7 57.79 5.7
 -7 6 -7 70.89 6.1
 -8 6 -7 16.1 3.6
 -8 6 -7 12.5 3.6
 -9 6 -7 6.1 3.1
 -10 6 -7 54.09 6.9
 -11 6 -7 87.69 8.4
 -12 6 -7 49.3 5
 8 5 -7 0.3 2.5
 7 5 -7 47.4 6.5
 -7 -5 7 42.3 8.8
 6 5 -7 54.59 6.3
 6 5 -7 46.3 6.5
 6 5 -7 55.19 7.6
 -6 -5 7 51.79 7.2
 5 5 -7 62.49 6
 5 5 -7 50.69 6.5
 5 5 -7 41.9 5.8
 -5 -5 7 70.69 7.6
 4 5 -7 67.49 7.1
 4 5 -7 67.69 7.5
 4 5 -7 88.09 7.3
 -4 -5 7 103.69 8.4
 -3 -5 7 33 4.4
 -2 -5 7 474.55 32.6
 -1 -5 7 16.1 2.5
 0 5 -7 158.98 11.9
 0 -5 7 183.68 12
 -1 5 -7 270.97 19.9
 -2 5 -7 4 2.3
 -3 5 -7 562.34 39.6
 -3 5 -7 571.34 38.5
 -4 5 -7 281.37 20.3
 -4 5 -7 292.37 21.4
 -5 5 -7 7.1 2.7
 -5 5 -7 10.5 2.4
 -6 5 -7 138.89 10
 -6 5 -7 122.79 11.2
 -7 5 -7 19.9 2.9
 -7 5 -7 11.7 3.2
 -7 5 -7 13.5 2.6
 -8 5 -7 333.47 24.1
 -8 5 -7 314.87 23.1
 -9 5 -7 17.9 4.1
 -10 5 -7 18.7 4.1
 -11 5 -7 93.99 8.6
 -12 5 -7 0.9 1.8
 8 4 -7 63.69 6.9
 -8 -4 7 44.6 9
 7 4 -7 164.08 13.4
 -7 -4 7 159.58 17
 -7 -4 7 152.08 14.1
 6 4 -7 287.67 21.2
 6 4 -7 282.27 21.4
 -6 -4 7 296.27 22.2
 5 4 -7 0.9 2.1
 5 4 -7 3.9 2.5
 -5 -4 7 5.7 2.9
 -4 -4 7 278.17 20.3
 -3 -4 7 166.28 12.6
 -2 -4 7 65.69 5.7
 -1 -4 7 129.59 9.5
 0 -4 7 1498.75 99.09
 -2 4 -7 5.2 2.1
 -2 4 -7 5 1.5
 -3 4 -7 2191.88 148.99
 -3 4 -7 2287.47 148.19
 -4 4 -7 125.69 10.7
 -4 4 -7 136.69 10.2
 -5 4 -7 49.6 5.4
 -5 4 -7 55.29 4.6
 5 -4 7 56.29 4.6
 -6 4 -7 357.26 24.5
 6 -4 7 353.56 24.6
 -7 4 -7 530.25 33.4
 -7 4 -7 447.16 32.4
 -7 4 -7 468.25 32.2
 7 -4 7 444.46 32.3
 -8 4 -7 184.98 14
 -8 4 -7 164.88 14.4
 8 -4 7 190.28 14
 -9 4 -7 16.5 3.8
 -10 4 -7 11.2 3.4
 -11 4 -7 71.49 6.8
 -10 -3 7 -0.7 2.2
 -9 -3 7 -0.4 2.4
 8 3 -7 25.9 4.6
 7 3 -7 133.29 13.1
 -7 -3 7 169.28 14.5
 -7 -3 7 204.18 18
 6 3 -7 19.1 3.9
 -6 -3 7 20.5 4.4
 -6 -3 7 20.2 6.1
 5 3 -7 167.38 13.2
 -5 -3 7 168.78 13.3
 -4 -3 7 4.6 2.1
 -3 -3 7 611.54 41.5
 -2 -3 7 8.3 1.8
 -1 -3 7 20 2.4
 0 3 -7 79.29 5.7
 0 -3 7 74.99 5.7
 -1 3 -7 786.12 49.3
 1 -3 7 698.93 49
 -2 3 -7 19.1 2.4
 -3 3 -7 144.39 10.1
 -3 3 -7 132.29 9.2
 3 -3 7 128.39 9.3
 -4 3 -7 9.9 2.3
 -4 3 -7 10.1 1.5
 4 -3 7 9.3 1.6
 -5 3 -7 504.15 34.4
 -5 3 -7 523.95 35.3
 5 -3 7 503.45 34.5
 -6 3 -7 236.38 16.3
 6 -3 7 216.08 16.2
 -7 3 -7 214.88 15.8
 -7 3 -7 235.38 17
 -7 3 -7 220.98 16.3
 7 -3 7 220.28 16.4
 -8 3 -7 188.38 13.7
 -8 3 -7 191.18 14.9
 8 -3 7 178.78 14.5
 8 -3 7 192.28 14.6
 -9 3 -7 107.79 9.7
 -9 3 -7 99.99 8.3
 -10 3 -7 18.8 3.8
 -11 3 -7 1.3 2
 -10 -2 7 0.3 2.2
 -9 -2 7 28.7 3.9
 8 2 -7 9.8 3.3
 -8 -2 7 3.1 4.3
 -8 -2 7 8.9 2.6
 7 2 -7 166.18 13.2
 -7 -2 7 154.48 13.7
 -7 -2 7 159.38 16.3
 -6 -2 7 61.69 6.8
 -6 -2 7 62.79 9.1
 5 2 -7 402.46 28.6
 -5 -2 7 400.36 28.3
 4 2 -7 1535.55 105.49
 -4 -2 7 1642.74 105.89
 3 2 -7 187.68 13.9
 -3 -2 7 207.68 14.3
 -2 -2 7 1050.09 69.89
 -1 -2 7 74.59 5.8
 0 2 -7 2436.36 158.28
 0 -2 7 2367.36 158.28
 -1 2 -7 113.39 8.1
 -1 2 -7 104.79 7.9
 1 -2 7 123.39 8
 -2 2 -7 125.29 8.4
 -2 2 -7 113.09 7.8
 2 -2 7 102.99 8
 -3 2 -7 1067.39 70.29
 3 -2 7 1057.39 70.39
 -4 2 -7 7.8 1.5
 4 -2 7 9.6 1.7
 -5 2 -7 335.77 23.5
 5 -2 7 345.27 23.5
 -6 2 -7 852.11 57.89
 6 -2 7 866.91 57.99
 -7 2 -7 309.47 21.8
 -7 2 -7 307.47 22.5
 -7 2 -7 325.57 22.6
 7 -2 7 304.57 22.3
 7 -2 7 307.57 22.3
 -8 2 -7 39 5.4
 -8 2 -7 52.59 5
 8 -2 7 44.9 5.5
 8 -2 7 42.3 5.6
 -9 2 -7 -2.5 2
 -9 2 -7 2.5 2.2
 -10 2 -7 49.8 5.5
 -10 2 -7 41.5 4.7
 -11 -1 7 9.6 2.3
 -10 -1 7 8.4 2.6
 -9 -1 7 357.66 24.9
 -9 -1 7 347.87 29.2
 8 1 -7 751.92 53.39
 -8 -1 7 756.82 58.69
 -8 -1 7 773.92 52.49
 -8 -1 7 822.32 57.89
 7 1 -7 0.9 2.6
 -7 -1 7 1.2 1.9
 -7 -1 7 3.6 3.8
 -7 -1 7 0.1 2.6
 6 1 -7 155.38 12.5
 -6 -1 7 163.78 13
 -6 -1 7 167.18 15.5
 5 1 -7 80.99 7.4
 -5 -1 7 93.49 7.9
 -5 -1 7 96.59 10
 4 1 -7 5.3 1.6
 -4 -1 7 5.7 2
 3 1 -7 153.98 11.3
 -3 -1 7 161.58 11.7
 2 1 -7 96.29 7.2
 -2 -1 7 100.19 7.5
 1 1 -7 1573.44 100.59
 -1 -1 7 1465.35 100.49
 0 1 -7 1783.42 113.69
 0 -1 7 1658.43 113.69
 -1 1 -7 1497.55 102.79
 1 -1 7 1613.84 102.79
 -2 1 -7 79.39 6
 2 -1 7 86.89 6.3
 -3 1 -7 14.1 2
 3 -1 7 20.3 2.4
 3 -1 7 17.9 2.3
 -4 1 -7 448.86 30.6
 4 -1 7 455.85 30.7
 4 -1 7 449.26 30.7
 -5 1 -7 423.76 29.3
 5 -1 7 428.96 29.4
 5 -1 7 428.96 29.4
 -6 1 -7 1117.69 74.99
 -6 1 -7 1096.99 75.49
 6 -1 7 1137.09 75.49
 6 -1 7 1143.79 75.49
 -7 1 -7 206.08 16.7
 -7 1 -7 220.98 16.1
 7 -1 7 241.78 17
 7 -1 7 222.98 16.9
 -8 1 -7 144.29 10.7
 -8 1 -7 127.29 11.2
 8 -1 7 133.79 11.6
 -9 1 -7 1.4 2.3
 -9 1 -7 1.9 2.2
 -10 1 -7 14.6 2.8
 -11 0 7 -1.6 1.9
 -10 0 7 2.9 2
 -9 0 7 415.46 29.2
 -9 0 7 427.76 33.9
 8 0 -7 183.08 14.6
 -8 0 7 195.48 18.2
 -8 0 7 163.88 13.4
 7 0 -7 29.8 4.6
 -7 0 7 43.2 4.2
 -7 0 7 37.9 5.4
 -7 0 7 28.9 6.8
 6 0 -7 3.5 2
 -6 0 7 3.1 2.2
 -6 0 7 3.5 3
 5 0 -7 56.59 5.8
 -5 0 7 79.79 8.3
 -5 0 7 59.09 6.1
 4 0 -7 78.39 6.5
 3 0 -7 377.26 26.1
 -3 0 7 388.06 26.3
 2 0 -7 1995.7 131.29
 -2 0 7 1979 131.49
 1 0 -7 2766.72 183.78
 1 0 -7 2734.13 183.58
 -1 0 7 2855.91 183.78
 0 0 -7 2611.84 171.48
 0 0 7 2586.54 171.48
 -1 0 -7 551.84 34.5
 1 0 7 470.25 34.4
 -2 0 -7 92.49 6.7
 2 0 7 81.59 6.9
 -3 0 -7 65.09 5.5
 3 0 7 75.79 5.9
 -4 0 -7 1.9 1.3
 4 0 7 1.3 1.5
 -5 0 -7 247.48 18.5
 5 0 7 274.57 18.8
 -6 0 -7 90.39 7.4
 -6 0 -7 81.99 7.7
 6 0 7 92.09 8
 -7 0 -7 31.2 4.3
 -7 0 -7 41.1 5.3
 7 0 7 49.4 6
 -8 0 -7 52.29 6
 -8 0 -7 54.79 5.9
 8 0 7 49.9 6.6
 -9 0 -7 368.56 25.9
 -10 0 -7 83.79 7.1
 -11 1 7 0.2 1.9
 -10 1 7 4.1 3.9
 -10 1 7 3.5 2.1
 -9 1 7 26 6.7
 -9 1 7 12.8 2.6
 8 -1 -7 11 3.3
 -8 1 7 8.5 2.3
 -8 1 7 9.8 4.7
 7 -1 -7 138.09 11.5
 -7 1 7 150.28 14.5
 -7 1 7 134.39 10.7
 -7 1 7 137.69 11.9
 6 -1 -7 41.2 4.8
 -6 1 7 42.4 5
 -6 1 7 38.1 6.8
 5 -1 -7 51.09 5.1
 -5 1 7 55.29 5.2
 -5 1 7 43.7 6.8
 4 -1 -7 189.18 13.5
 -4 1 7 178.78 13.5
 3 -1 -7 1099.49 72.09
 -3 1 7 1061.09 72.09
 2 -1 -7 21.3 2.8
 -2 1 7 24.7 3
 1 -1 -7 1089.09 72.59
 1 -1 -7 1057.19 72.39
 -1 1 7 1128.69 72.59
 0 -1 -7 906.31 58.99
 0 -1 -7 829.92 59.09
 0 1 7 925.01 59.19
 -1 -1 -7 153.98 11.5
 -1 -1 -7 164.68 11.9
 1 1 7 175.28 11.9
 -2 -1 -7 1587.24 103.49
 -2 -1 -7 1459.55 103.19
 2 1 7 1632.64 103.69
 -3 -1 -7 84.79 7.4
 3 1 7 113.59 8
 -4 -1 -7 282.37 20.9
 4 1 7 315.07 21.2
 5 1 7 0.6 1.8
 -6 -1 -7 7.8 2.2
 -6 -1 -7 9 2.6
 6 1 7 4.5 2.6
 -7 -1 -7 73.89 7.1
 7 1 7 76.89 8.1
 -8 -1 -7 0.3 2.2
 -9 -1 -7 35.7 4.6
 -10 -1 -7 15 2.7
 -11 2 7 92.79 7.6
 -10 2 7 57.19 5.4
 -10 2 7 50.79 8.6
 -9 2 7 57.09 5.2
 -9 2 7 37.6 8
 8 -2 -7 463.35 33.4
 -8 2 7 496.75 36.9
 -8 2 7 450.45 32.3
 7 -2 -7 240.48 17.6
 7 -2 -7 221.58 16.7
 -7 2 7 233.48 16.6
 -7 2 7 231.98 17.7
 -7 2 7 230.28 20.3
 6 -2 -7 129.89 10.4
 -6 2 7 124.49 12.6
 -6 2 7 128.69 10.5
 5 -2 -7 99.19 8.3
 -5 2 7 100.09 10.3
 4 -2 -7 1868.41 124.39
 -4 2 7 1878.01 124.49
 3 -2 -7 -0.5 1.3
 -3 2 7 0.6 1.3
 2 -2 -7 1050.79 71.29
 2 -2 -7 1092.29 71.49
 -2 2 7 1066.89 71.39
 1 -2 -7 700.63 50.59
 1 -2 -7 771.72 50.59
 -1 2 7 799.12 50.79
 0 -2 -7 282.97 19.9
 0 2 7 296.87 20.2
 -1 -2 -7 513.25 35.7
 -1 -2 -7 502.35 35.4
 1 2 7 559.24 35.7
 -2 -2 -7 1825.02 125.99
 -2 -2 -7 1896.51 125.79
 2 2 7 1975.1 126.09
 3 2 7 2945.21 195.08
 4 2 7 431.16 30.3
 -5 -2 -7 295.07 21.3
 5 2 7 310.27 22.2
 -6 -2 -7 122.39 9.7
 6 2 7 115.09 10.8
 -7 -2 -7 3.3 2.3
 7 2 7 6.5 3.7
 -8 -2 -7 242.48 17.8
 -9 -2 -7 22.6 3.6
 -10 -2 -7 7.7 2.2
 -12 3 7 -0.1 1.7
 -11 3 7 49.99 5.1
 -10 3 7 1.4 1.8
 -10 3 7 -0.1 3.4
 9 -3 -7 30.5 5.2
 -9 3 7 37.7 4.2
 -9 3 7 22.2 6.3
 -9 3 7 40.4 5.4
 8 -3 -7 22.8 4.4
 -8 3 7 30.6 6.9
 -8 3 7 13.6 2.8
 7 -3 -7 1.2 2
 -7 3 7 1.7 3
 -7 3 7 3.1 1.5
 6 -3 -7 23.6 3.8
 -6 3 7 22.8 3.8
 -6 3 7 18.7 5
 5 -3 -7 207.88 14.9
 -5 3 7 202.08 15
 -5 3 7 190.18 16.9
 4 -3 -7 506.75 34.2
 -4 3 7 489.85 34.2
 3 -3 -7 21.3 3
 -3 3 7 20.9 3.2
 2 -3 -7 29.3 3.4
 -2 3 7 29.7 3.6
 1 -3 -7 956 65.19
 -1 3 7 997.3 65.39
 0 -3 -7 149.29 10.7
 0 -3 -7 133.59 10.4
 0 3 7 135.99 10.5
 -1 -3 -7 202.28 14.8
 1 3 7 209.38 15
 -2 -3 -7 401.26 28.1
 2 3 7 407.46 28.2
 -3 -3 -7 430.46 30.6
 3 3 7 448.46 30.8
 4 3 7 32.1 4.8
 -5 -3 -7 4.7 2.2
 5 3 7 3.5 2.9
 -6 -3 -7 107.49 9
 6 3 7 105.29 10.4
 -7 -3 -7 27.4 4.2
 7 3 7 25.2 6.3
 -8 -3 -7 69.99 6.9
 -9 -3 -7 3.1 2.3
 -10 -3 -7 84.89 6.8
 -12 4 7 10.8 2.3
 -11 4 7 11.8 5.2
 -11 4 7 22 3.1
 -10 4 7 8.7 2.4
 -10 4 7 10.2 4.6
 -10 4 7 7.7 3
 9 -4 -7 305.37 24.3
 -9 4 7 341.87 23.4
 -9 4 7 348.97 24.8
 -9 4 7 326.17 27.4
 8 -4 -7 5.8 2.6
 -8 4 7 3.2 3.6
 -8 4 7 3.3 1.7
 7 -4 -7 188.38 14.4
 -7 4 7 181.28 13.4
 -7 4 7 176.38 16.7
 6 -4 -7 4.3 2.1
 -6 4 7 6.7 3.7
 -6 4 7 3.2 2.1
 5 -4 -7 357.06 24.3
 -5 4 7 324.07 26.1
 -5 4 7 341.77 24.3
 4 -4 -7 60.39 5.9
 -4 4 7 68.69 6.2
 3 -4 -7 479.85 33.5
 -3 4 7 498.65 33.7
 2 -4 -7 294.77 20.4
 -2 4 7 283.77 20.5
 1 -4 -7 36.7 4.1
 -1 4 7 38.2 4.3
 0 -4 -7 332.37 23.3
 0 4 7 330.97 23.3
 -1 -4 -7 98.69 8.3
 1 4 7 99.09 8.2
 -2 -4 -7 33.3 4.6
 2 4 7 37.6 4.5
 -3 -4 -7 14 3.4
 3 4 7 23.9 3.9
 -4 -4 -7 1.4 2
 4 4 7 4.6 2.7
 -5 -4 -7 260.67 19.2
 5 4 7 271.57 20.5
 -6 -4 -7 2.7 2.4
 6 4 7 1.8 3.3
 -7 -4 -7 178.78 13.8
 -8 -4 -7 29.1 3.9
 -9 -4 -7 18.8 3.1
 9 4 7 20.5 3.6
 -12 5 7 11.5 2.2
 -11 5 7 478.45 30.5
 -11 5 7 435.16 31.1
 -11 5 7 421.36 33.8
 -10 5 7 240.58 18.5
 -10 5 7 253.17 17.4
 -10 5 7 225.28 20.7
 -9 5 7 28.2 3.8
 -9 5 7 27.8 6.8
 8 -5 -7 4.2 2.5
 -8 5 7 2 3.6
 -8 5 7 7.9 2
 7 -5 -7 8.2 2.8
 -7 5 7 11.4 4.7
 -7 5 7 9.2 2.2
 6 -5 -7 4.7 2.3
 -6 5 7 8.9 2.1
 -6 5 7 3 3.2
 5 -5 -7 264.57 19
 -5 5 7 257.77 19
 -5 5 7 256.77 21
 4 -5 -7 2698.53 175.78
 -4 5 7 2690.23 175.88
 -4 5 7 2563.24 177.78
 3 -5 -7 41 4.5
 -3 5 7 40.2 4.6
 2 -5 -7 375.46 25.6
 -2 5 7 356.36 25.6
 1 -5 -7 388.26 27.2
 -1 5 7 389.96 27.2
 0 -5 -7 49.3 5.3
 0 5 7 48.3 5.1
 -1 -5 -7 1.2 2
 1 5 7 2.3 1.8
 -2 -5 -7 4.8 2.7
 2 5 7 7.1 2.5
 -3 -5 -7 773.02 53.39
 -3 -5 -7 780.92 52.59
 3 5 7 778.52 53.29
 -4 -5 -7 557.74 39.4
 4 5 7 594.54 40.5
 -5 -5 -7 1.4 2.2
 5 5 7 0.4 2.8
 -6 -5 -7 6.8 2.8
 -7 -5 -7 105.79 9.1
 -8 -5 -7 1.7 2.1
 8 5 7 2.7 2.5
 -9 -5 -7 3.7 2
 -12 6 7 86.49 6.7
 -11 6 7 61.39 8.9
 -11 6 7 61.39 5.6
 -11 6 7 63.79 6.7
 -10 6 7 24.3 6.4
 -10 6 7 19.2 4.5
 -10 6 7 17.9 3
 -9 6 7 63.39 6
 -9 6 7 56.69 9.1
 8 -6 -7 244.58 19
 -8 6 7 256.97 18
 -8 6 7 241.88 21.9
 7 -6 -7 3.9 2.6
 -7 6 7 3.5 3.6
 -7 6 7 11.3 2.3
 6 -6 -7 -0.5 1.8
 -6 6 7 2.9 4.5
 -6 6 7 0.7 2.8
 5 -6 -7 1.6 1.9
 -5 6 7 1 2.7
 4 -6 -7 582.04 37.4
 -4 6 7 523.45 37.3
 -4 6 7 515.85 39.2
 3 -6 -7 1.8 1.9
 -3 6 7 2.8 2
 -3 6 7 5.4 5.9
 2 -6 -7 1153.48 76.79
 -2 6 7 1129.59 76.69
 1 -6 -7 53.69 6
 -1 6 7 55.19 5.7
 0 -6 -7 440.96 31.7
 0 6 7 458.55 31.4
 -1 -6 -7 9.9 3
 1 6 7 13 3
 -2 -6 -7 9.3 2.5
 -2 -6 -7 6.7 3.1
 2 6 7 6.6 2.6
 -3 -6 -7 388.36 26.6
 -3 -6 -7 355.56 27.4
 3 6 7 389.96 27.4
 -4 -6 -7 6.2 2.5
 4 6 7 7.9 3.3
 4 6 7 4.5 2.3
 -5 -6 -7 16.7 3.4
 5 6 7 23.7 4.9
 5 6 7 21.6 3.2
 -6 -6 -7 20.3 3.7
 -7 -6 -7 4.2 2.5
 7 6 7 2.1 2.6
 -8 -6 -7 17.6 3
 8 6 7 15.9 3.1
 -12 7 7 25.2 3.6
 -12 7 7 29.1 2.9
 -11 7 7 7.3 1.9
 -11 7 7 8.7 3
 -11 7 7 5.5 3.7
 -10 7 7 27.6 5.2
 -10 7 7 32 7.1
 -10 7 7 28.6 3.8
 -9 7 7 9.4 2.4
 -9 7 7 14.6 5.5
 8 -7 -7 44.6 6.2
 -8 7 7 50.89 5.6
 -8 7 7 53.69 8.8
 7 -7 -7 348.67 25.9
 -7 7 7 376.26 29.3
 -7 7 7 339.27 25
 6 -7 -7 15.1 3.4
 -6 7 7 13.2 4.6
 -6 7 7 11.5 4.5
 5 -7 -7 1210.48 81.89
 -5 7 7 1204.08 83.69
 -5 7 7 1226.18 84.59
 4 -7 -7 414.06 30
 -4 7 7 433.66 32.4
 3 -7 -7 632.54 43.6
 -3 7 7 628.64 45.5
 2 -7 -7 614.04 41.4
 -2 7 7 580.04 40.9
 -2 7 7 592.44 43.3
 1 -7 -7 13.1 3.3
 -1 7 7 15.6 3.1
 0 -7 -7 138.49 12.2
 0 7 7 138.69 11.8
 0 7 7 162.18 11.1
 -1 -7 -7 2.4 2.8
 -1 -7 -7 1.4 2.4
 1 7 7 0.8 2.1
 1 7 7 6.7 2
 1 7 7 11.6 4.6
 -2 -7 -7 653.33 46.1
 -2 -7 -7 704.83 47.1
 2 7 7 640.14 49.5
 2 7 7 706.53 45.9
 2 7 7 666.53 46.7
 -3 -7 -7 31.1 4.3
 -3 -7 -7 27 5.1
 3 7 7 34.3 5.4
 3 7 7 36.5 5
 3 7 7 30.8 3.9
 -4 -7 -7 182.58 13.8
 4 7 7 172.98 14
 4 7 7 176.68 13.2
 -5 -7 -7 101.89 8.7
 5 7 7 78.09 8.5
 5 7 7 105.49 9.1
 -6 -7 -7 154.78 11.9
 6 7 7 144.79 12
 -7 -7 -7 -3.1 1.9
 7 7 7 2.4 2.1
 -11 8 7 7.4 3
 -11 8 7 8.8 4
 -11 8 7 8.2 1.8
 -10 8 7 0.6 2.8
 -10 8 7 3.9 3.8
 -10 8 7 5.6 2
 -9 8 7 15 3.1
 -9 8 7 22.3 6.4
 8 -8 -7 156.38 13.7
 -8 8 7 144.29 12.5
 -8 8 7 193.18 17.5
 7 -8 -7 96.49 9.4
 -7 8 7 92.59 8.3
 -7 8 7 98.29 12.4
 -7 8 7 103.99 11.4
 6 -8 -7 5 2.7
 -6 8 7 0.1 3.5
 -6 8 7 7.8 4.1
 5 -8 -7 93.09 9
 -5 8 7 93.19 11.3
 -5 8 7 110.39 11.2
 4 -8 -7 41.3 5.6
 -4 8 7 30.6 6.6
 -4 8 7 49.99 7.7
 -4 8 7 38.4 6.9
 3 -8 -7 305.07 22.9
 -3 8 7 334.67 25
 -3 8 7 301.87 24.5
 -3 8 7 288.77 25.1
 -3 8 7 326.47 21.7
 2 -8 -7 351.36 26.2
 -2 8 7 376.06 24.8
 -2 8 7 328.97 28
 -2 8 7 384.46 28.1
 -2 8 7 358.76 27.7
 1 -8 -7 269.77 21.9
 -1 8 7 324.67 23.9
 -1 8 7 290.27 23.4
 -1 8 7 296.17 20.6
 0 -8 -7 579.34 42.8
 0 8 7 624.74 44
 0 8 7 628.94 41.5
 -1 -8 -7 537.95 41
 1 8 7 608.24 39.8
 1 8 7 606.64 42.1
 -2 -8 -7 94.09 9.1
 -2 -8 -7 93.79 9.8
 2 8 7 112.39 8.4
 2 8 7 101.09 10.8
 -3 -8 -7 378.16 30.3
 -3 -8 -7 430.96 29.3
 3 8 7 423.46 28.8
 3 8 7 426.16 29.5
 -4 -8 -7 17.5 3.6
 4 8 7 15 2.9
 4 8 7 18.5 3.7
 -5 -8 -7 49.3 5.7
 5 8 7 50.69 6
 -6 -8 -7 6.1 2.5
 6 8 7 10.8 3
 -7 -8 -7 7.9 2.4
 -11 9 7 45.9 4
 -11 9 7 44.5 7.2
 -11 9 7 43.7 5.5
 -10 9 7 271.77 19.7
 -10 9 7 299.27 24.1
 -10 9 7 274.97 21.5
 -9 9 7 -0.9 1.8
 -9 9 7 4.6 4.1
 -8 9 7 2.5 3.9
 -8 9 7 2.8 2
 -8 9 7 4.2 3.9
 7 -9 -7 47.6 7
 -7 9 7 68.99 9.2
 -7 9 7 62.79 6.2
 -7 9 7 61.19 9.9
 6 -9 -7 136.69 12.1
 -6 9 7 142.19 15.1
 -6 9 7 137.39 13.7
 5 -9 -7 98.59 9.6
 -5 9 7 82.79 10.7
 -5 9 7 124.59 13.1
 4 -9 -7 69.29 7.7
 -4 9 7 76.19 9.5
 -4 9 7 78.49 10.4
 -4 9 7 76.09 6.5
 -4 9 7 61.59 9.5
 3 -9 -7 182.68 14.1
 -3 9 7 194.48 17
 -3 9 7 133.49 15.4
 -3 9 7 166.18 12.4
 -3 9 7 154.08 15.3
 2 -9 -7 11 3.6
 -2 9 7 12.9 2.6
 -2 9 7 25.4 6.2
 -2 9 7 25.9 6
 1 -9 -7 253.37 17.3
 -1 9 7 193.18 18.1
 -1 9 7 213.98 15.4
 -1 9 7 190.88 18
 0 -9 -7 20.8 4.6
 0 9 7 31.8 6.3
 0 9 7 22.7 3.4
 -1 -9 -7 144.29 14.6
 1 9 7 195.78 13.6
 1 9 7 203.08 16.4
 -2 -9 -7 58.79 7.3
 2 9 7 59.29 8.3
 2 9 7 56.29 5.6
 -3 -9 -7 40.7 5.6
 3 9 7 42.3 4.8
 3 9 7 52.39 6
 -4 -9 -7 7.9 3.2
 4 9 7 10.5 2.4
 4 9 7 8.8 3.1
 -5 -9 -7 27.3 4.4
 5 9 7 32.8 4.5
 -6 -9 -7 -2.5 2
 -11 10 7 8.9 2.7
 -10 10 7 -0.5 2.4
 -10 10 7 0.2 1.3
 -10 10 7 3 3.6
 -9 10 7 28.6 3.6
 -9 10 7 33.7 5.5
 -9 10 7 25.5 7
 -8 10 7 9.8 2.4
 -8 10 7 20.8 6.7
 -8 10 7 4.7 4.2
 -7 10 7 235.18 19.8
 -7 10 7 214.78 21.3
 -7 10 7 239.58 16.9
 6 -10 -7 91.69 9.2
 -6 10 7 84.09 10.6
 5 -10 -7 40.4 5.9
 -5 10 7 43.4 8.8
 4 -10 -7 31.2 5.2
 -4 10 7 38.7 8.2
 -4 10 7 37.3 4.5
 -4 10 7 34.4 7.1
 -4 10 7 30.7 7.3
 3 -10 -7 108.69 10.6
 -3 10 7 118.79 9.3
 -3 10 7 104.99 12.6
 -3 10 7 108.99 13.1
 -3 10 7 126.99 12.7
 2 -10 -7 39.5 5.6
 -2 10 7 28.5 6.6
 -2 10 7 27.4 7
 -2 10 7 36.4 4.4
 1 -10 -7 256.27 19.9
 -1 10 7 250.27 18.3
 -1 10 7 253.47 21.3
 -1 10 7 258.77 21.6
 0 -10 -7 111.69 10.8
 0 10 7 115.79 9.3
 0 10 7 119.09 12.8
 1 10 7 1.6 1.9
 1 10 7 0.6 4.4
 2 10 7 2.7 4.2
 2 10 7 0.4 1.7
 3 10 7 9.3 2.5
 -4 -10 -7 61.29 6.7
 4 10 7 68.39 5.9
 -5 -10 -7 7.6 2.6
 -11 11 7 5 2.1
 -10 11 7 75.49 5.8
 -10 11 7 78.79 9.7
 -10 11 7 82.09 7.4
 -9 11 7 1 1.3
 -9 11 7 -0.3 3.8
 -9 11 7 1.2 2.6
 -8 11 7 3.4 4
 -8 11 7 9.9 5.3
 -8 11 7 4.2 1.9
 -7 11 7 183.38 17.5
 -7 11 7 201.98 14.7
 -7 11 7 215.48 20
 -6 11 7 38.5 8.1
 -6 11 7 21.5 6
 -5 11 7 1.1 4.1
 -5 11 7 4.4 4.4
 4 -11 -7 31.8 5.6
 -4 11 7 51.19 5.1
 -4 11 7 45.5 8.7
 -4 11 7 44.1 8.2
 -4 11 7 41.3 8.4
 3 -11 -7 27.4 4.9
 -3 11 7 23.7 3.5
 -3 11 7 20.7 6.7
 -3 11 7 14 5.5
 -2 11 7 87.39 10.6
 -2 11 7 89.49 11.9
 -2 11 7 77.59 7.3
 -1 11 7 81.89 7.3
 -1 11 7 81.79 11.3
 0 11 7 3.1 2.1
 0 11 7 0.3 4.4
 1 11 7 141.29 13.8
 1 11 7 135.29 10.8
 2 11 7 0.5 1.9
 2 11 7 1.2 4.2
 3 11 7 32.3 3.9
 -10 12 7 15 2.9
 -9 12 7 13.6 3.1
 -9 12 7 8.9 3.8
 -9 12 7 11.1 2.3
 -9 12 7 17 5.1
 -8 12 7 10.9 4.2
 -8 12 7 2.9 1.6
 -8 12 7 7 2.9
 -8 12 7 4.5 4.4
 -7 12 7 79.19 11.6
 -7 12 7 117.89 11.6
 -7 12 7 109.99 8.1
 -6 12 7 18.5 6
 -6 12 7 40.6 7.3
 -5 12 7 16.8 5.9
 -5 12 7 28.6 6.7
 -5 12 7 20.9 3.4
 -4 12 7 4.7 4.2
 -4 12 7 6 2.3
 -3 12 7 30.9 4.1
 -3 12 7 27.8 7.3
 -3 12 7 26.8 6.4
 -2 12 7 44.5 8.3
 -2 12 7 37.7 4.7
 -2 12 7 40.2 7.4
 -1 12 7 22.2 6.5
 -1 12 7 18.4 3.4
 0 12 7 37.6 7.1
 0 12 7 23.1 3.7
 1 12 7 -0.3 4.2
 1 12 7 1 2
 2 12 7 16.5 2.7
 2 12 7 9.5 4.6
 3 12 7 0.8 2.1
 -9 13 7 -1.1 1.8
 -9 13 7 2.8 2.7
 -8 13 7 60.99 7.5
 -7 13 7 49 7.7
 -7 13 7 61.09 4.9
 -7 13 7 64.49 9.5
 -6 13 7 11 2.2
 -6 13 7 8.7 4.5
 -5 13 7 6.8 4.5
 -5 13 7 7.9 2.3
 -4 13 7 18.4 5.5
 -4 13 7 19.8 3.2
 -3 13 7 19.7 5.4
 -3 13 7 23.8 3.5
 -2 13 7 2.7 4.6
 -2 13 7 11.2 5.3
 -2 13 7 8.9 2.5
 -1 13 7 96.19 8.1
 0 13 7 6.1 4.1
 0 13 7 4.9 2.1
 1 13 7 49.4 4.8
 1 13 7 51.59 7
 -8 14 7 5.5 3
 -7 14 7 28.5 5.2
 -6 14 7 39 6.3
 -5 14 7 12 2.5
 -5 14 7 13.3 4.3
 -4 14 7 155.68 13.3
 -4 14 7 140.49 11
 -3 14 7 39.7 6.3
 -3 14 7 33.7 4
 -2 14 7 20.8 3
 -1 14 7 27.3 3.3
 0 14 7 9.6 2
 -6 15 7 11.7 3.4
 -5 15 7 1 2.5
 -4 15 7 57.09 6.6
 -4 15 7 60.79 5.1
 -3 15 7 34.5 3.6
 -4 16 -8 5.8 1.8
 -5 16 -8 -0.7 1.4
 -5 16 -8 1.2 2.6
 -1 15 -8 42.6 5.8
 -1 15 -8 56.39 6.5
 -2 15 -8 5.5 3.2
 -2 15 -8 3.2 1.9
 -3 15 -8 3.1 2.9
 -3 15 -8 2.3 1.8
 -3 15 -8 6.1 3.6
 -4 15 -8 9.3 2.4
 -4 15 -8 9.4 3.9
 -5 15 -8 2.2 2
 -5 15 -8 0.5 3.2
 -6 15 -8 10.9 2.5
 -6 15 -8 9.9 4
 -7 15 -8 9.9 3.4
 -7 15 -8 20 2.8
 -7 15 -8 12.6 2.5
 -8 15 -8 129.99 9.7
 -8 15 -8 119.49 10.3
 -8 15 -8 106.69 9.1
 1 14 -8 11.1 3.3
 1 14 -8 22.3 4.1
 0 14 -8 8.8 3.4
 0 14 -8 9.2 3.7
 -1 14 -8 30.3 4
 -1 14 -8 40.3 5.9
 -1 14 -8 42.6 6.1
 -2 14 -8 16.4 4.2
 -2 14 -8 7.7 4.3
 -2 14 -8 7.7 2.4
 -3 14 -8 9.7 2.6
 -3 14 -8 10.4 4.1
 -3 14 -8 9.5 4.4
 -4 14 -8 34.9 4.5
 -4 14 -8 37.7 5.9
 -4 14 -8 39.7 7
 -5 14 -8 -2.7 3.4
 -5 14 -8 0.1 2.2
 -5 14 -8 -2.7 1.9
 -6 14 -8 -0.4 2.2
 -6 14 -8 -0.9 3.5
 -6 14 -8 1.4 2.3
 -7 14 -8 5.9 3.8
 -7 14 -8 6.2 2.3
 -7 14 -8 8.4 2.6
 -8 14 -8 6 3.5
 -8 14 -8 11.5 2.6
 -8 14 -8 11.2 2.6
 -9 14 -8 4.9 1.9
 3 13 -8 0.3 2.3
 2 13 -8 4.8 3
 2 13 -8 6 2.9
 1 13 -8 18.7 4
 1 13 -8 16 4.2
 0 13 -8 7.2 3.3
 0 13 -8 4.2 3.4
 -1 13 -8 0.3 2.9
 -1 13 -8 2.9 2.2
 -1 13 -8 -3.1 3.3
 -2 13 -8 35.5 6.1
 -2 13 -8 30.3 6.7
 -2 13 -8 30.8 4.3
 -3 13 -8 19.2 3.5
 -3 13 -8 23.9 6
 -3 13 -8 19.6 5.1
 -4 13 -8 3.5 4
 -4 13 -8 1.9 2.3
 -4 13 -8 0.5 2.4
 -4 13 -8 2.3 3.8
 -5 13 -8 0.4 2.4
 -5 13 -8 2.9 4
 -5 13 -8 1.3 2.3
 -6 13 -8 8.3 4.8
 -6 13 -8 3.1 2.5
 -6 13 -8 9.6 3
 -7 13 -8 8.3 2.9
 -7 13 -8 7.9 4.5
 -7 13 -8 6.8 2.7
 -8 13 -8 18 5
 -8 13 -8 14.7 3.2
 -8 13 -8 12.6 3
 -9 13 -8 18 3.1
 -10 13 -8 10.8 2.3
 4 12 -8 19.1 3.5
 3 12 -8 11.3 3.6
 3 12 -8 13.1 3.4
 2 12 -8 17.9 4.4
 2 12 -8 16.9 4
 1 12 -8 108.09 9.9
 1 12 -8 124.19 11
 1 12 -8 109.39 10.8
 0 12 -8 14.2 4.2
 0 12 -8 14.8 4.2
 0 12 -8 17.9 3.6
 -1 12 -8 7.9 3.6
 -1 12 -8 7.9 3.6
 -1 12 -8 5.7 2.7
 -1 12 -8 7.1 4.6
 -1 12 -8 2.3 2.4
 -2 12 -8 9.2 2.9
 -2 12 -8 4.2 3.5
 -2 12 -8 20.9 5.8
 -3 12 -8 30.8 6.1
 -3 12 -8 34.8 4.8
 -3 12 -8 26.6 6.6
 -4 12 -8 16.9 5.9
 -4 12 -8 12.4 3.2
 -4 12 -8 8.7 4.4
 -4 12 -8 8.5 3
 -5 12 -8 123.99 11.8
 -5 12 -8 108.89 13
 -5 12 -8 103.09 9.8
 -5 12 -8 106.69 9.6
 -6 12 -8 161.28 12.3
 -6 12 -8 142.69 15.1
 -6 12 -8 139.39 12.1
 -7 12 -8 117.09 10
 -7 12 -8 106.39 9.8
 -7 12 -8 112.19 12.6
 -8 12 -8 6.3 4.5
 -8 12 -8 7.1 2.8
 -8 12 -8 7.7 2.8
 -9 12 -8 17.7 3.6
 -10 12 -8 4.6 2.1
 5 11 -8 35.9 4.9
 4 11 -8 6.2 2.9
 4 11 -8 11.8 3.6
 3 11 -8 18.6 4
 3 11 -8 13.1 4.3
 2 11 -8 8.9 3.1
 2 11 -8 10.9 4.1
 2 11 -8 15.2 4
 1 11 -8 7.9 3.8
 1 11 -8 7 2.8
 1 11 -8 15.2 3.9
 0 11 -8 1.6 2.9
 0 11 -8 -0.4 2.3
 0 11 -8 1.7 3
 -1 11 -8 26.8 5.1
 -1 11 -8 32 6.6
 -1 11 -8 32.8 4.4
 -1 11 -8 29.4 5.2
 -1 11 -8 29.9 4.6
 -2 11 -8 28.2 5.6
 -2 11 -8 38.1 4.9
 -2 11 -8 41.7 7.5
 -3 11 -8 70.49 7.7
 -3 11 -8 80.29 7.6
 -3 11 -8 85.19 9.5
 -3 11 -8 82.19 10.9
 -4 11 -8 13.5 3.3
 -4 11 -8 14.9 3.5
 -4 11 -8 17.1 5.9
 -4 11 -8 11.7 3.3
 -4 11 -8 15.5 4.9
 -5 11 -8 239.38 20.6
 -5 11 -8 203.78 18
 -5 11 -8 190.58 16.5
 -5 11 -8 223.28 15.8
 -5 11 -8 229.78 16.7
 -6 11 -8 276.37 19.8
 -6 11 -8 275.67 18.9
 -6 11 -8 253.17 23.1
 -6 11 -8 247.08 19.7
 -7 11 -8 19.4 6.2
 -7 11 -8 24.4 4.2
 -7 11 -8 21.1 4.1
 -8 11 -8 6.5 4.6
 -8 11 -8 5.5 2.8
 -8 11 -8 7.1 2.7
 -9 11 -8 15.1 3.4
 -9 11 -8 16.6 3.5
 -10 11 -8 12.6 3
 -10 11 -8 10.7 2.9
 -11 11 -8 8.3 2.2
 -11 11 -8 11.8 2.4
 6 10 -8 -1.4 2.1
 5 10 -8 9.6 3.1
 5 10 -8 6.1 3.3
 4 10 -8 119.59 10.8
 4 10 -8 133.09 11.5
 3 10 -8 3.2 2.8
 3 10 -8 1.4 2.5
 3 10 -8 1.1 3
 2 10 -8 5.7 2.8
 2 10 -8 0.1 2.8
 2 10 -8 1 2.5
 1 10 -8 558.04 38.8
 1 10 -8 541.45 38.3
 1 10 -8 552.44 38.8
 -1 -10 8 541.95 38.5
 0 10 -8 33.2 4.8
 0 10 -8 30.4 4.6
 0 10 -8 32.4 5.1
 0 10 -8 32.7 5.3
 -1 10 -8 12.4 3.1
 -1 10 -8 12.4 3.8
 -1 10 -8 17.4 5.2
 -1 10 -8 14.8 3.9
 -1 10 -8 12.6 3.1
 -2 10 -8 37.3 5.8
 -2 10 -8 26.6 4.3
 -2 10 -8 42.2 7.8
 -2 10 -8 39.7 4.9
 -3 10 -8 26.7 5.5
 -3 10 -8 27.5 4.5
 -3 10 -8 26.7 4.1
 -3 10 -8 31.2 6.3
 -3 10 -8 29.4 7.9
 -3 10 -8 38.4 7.4
 -4 10 -8 55.79 5.7
 -4 10 -8 47.7 4.6
 -4 10 -8 31 8.3
 -4 10 -8 42.8 6.8
 -4 10 -8 57.99 5.8
 -4 10 -8 39.2 7.2
 -5 10 -8 107.49 14.4
 -5 10 -8 152.08 10.1
 -5 10 -8 138.99 12.4
 -5 10 -8 117.19 13.2
 -6 10 -8 59.49 6.8
 -6 10 -8 62.39 6.5
 -6 10 -8 40.4 8.6
 -7 10 -8 2.5 2.5
 -7 10 -8 6.4 4.8
 -7 10 -8 2.3 2.8
 -8 10 -8 -0.5 2.7
 -8 10 -8 -1.8 2.2
 -8 10 -8 -1.7 2.4
 -9 10 -8 77.99 7.9
 -9 10 -8 76.39 7.8
 -10 10 -8 78.19 7.7
 -10 10 -8 75.79 7.4
 -11 10 -8 1.9 2.1
 -11 10 -8 -0.2 2
 6 9 -8 3.7 2.8
 6 9 -8 7.9 3.6
 -6 -9 8 9.6 4.6
 5 9 -8 8.4 3.4
 5 9 -8 4.3 2.9
 4 9 -8 21.1 4.6
 4 9 -8 18.9 4.1
 4 9 -8 23.8 4.4
 3 9 -8 61.99 6.9
 3 9 -8 70.59 8
 3 9 -8 55.29 6.8
 -3 -9 8 53.19 7.1
 2 9 -8 143.19 12.5
 2 9 -8 166.78 12.6
 2 9 -8 160.28 13.2
 -2 -9 8 130.79 12.4
 1 9 -8 31.5 4.3
 1 9 -8 21.7 4.4
 1 9 -8 19.1 4
 -1 -9 8 21.7 4.1
 0 9 -8 2.5 2.5
 0 9 -8 0.9 2.5
 0 9 -8 4.3 2.5
 0 9 -8 0.9 2.1
 0 9 -8 2 4.1
 -1 9 -8 11.1 3.6
 -1 9 -8 11.4 2.9
 -1 9 -8 9.4 4.7
 -1 9 -8 10.5 2.8
 -1 9 -8 12.1 3.6
 -2 9 -8 7.4 4.3
 -2 9 -8 7.1 4.7
 -2 9 -8 2 2.8
 -2 9 -8 4.6 2.3
 -2 9 -8 7 2.4
 -2 9 -8 3.6 2.4
 -3 9 -8 150.78 15.2
 -3 9 -8 116.59 13.3
 -3 9 -8 126.29 10.8
 -3 9 -8 124.29 9.9
 -3 9 -8 155.88 13.3
 -3 9 -8 132.39 12.2
 -3 9 -8 125.99 10.7
 -4 9 -8 25.9 5.2
 -4 9 -8 32.5 7.2
 -4 9 -8 16.2 3.4
 -4 9 -8 27.5 3.4
 -4 9 -8 17.5 3.5
 -4 9 -8 30.5 6.1
 -4 9 -8 10.3 5.2
 -5 9 -8 580.94 41
 -5 9 -8 462.45 39.1
 -5 9 -8 525.15 35.7
 -5 9 -8 515.15 36.3
 -5 9 -8 497.75 39
 -5 9 -8 550.24 36.7
 -6 9 -8 153.68 12.7
 -6 9 -8 113.49 14.8
 -6 9 -8 178.88 12
 -6 9 -8 138.09 12.2
 -6 9 -8 192.38 16.1
 -7 9 -8 28.3 4.9
 -7 9 -8 27.8 4.2
 -7 9 -8 17.6 3.4
 -7 9 -8 28.6 4.8
 -7 9 -8 35.4 7.1
 -8 9 -8 178.68 13.7
 -8 9 -8 180.58 14.6
 -8 9 -8 179.18 14.7
 -9 9 -8 158.08 13.4
 -9 9 -8 160.98 13.3
 -10 9 -8 173.38 14.9
 -10 9 -8 218.18 15.8
 -11 9 -8 15.6 3.5
 7 8 -8 -2.3 2.3
 6 8 -8 54.79 6.2
 6 8 -8 61.59 6.7
 -6 -8 8 38 7.9
 5 8 -8 0.4 2.5
 5 8 -8 3.6 3.3
 4 8 -8 147.29 11.6
 4 8 -8 152.08 12.4
 4 8 -8 125.39 11.3
 -4 -8 8 110.69 11.8
 3 8 -8 10.2 3.2
 3 8 -8 6.8 3.3
 3 8 -8 16 3.7
 -3 -8 8 21.1 4.5
 2 8 -8 135.29 11
 2 8 -8 113.19 11.1
 2 8 -8 130.69 10.8
 -2 -8 8 143.59 11.6
 1 8 -8 391.36 27.8
 1 8 -8 421.76 27.6
 1 8 -8 376.86 27.7
 -1 -8 8 357.76 27.4
 0 8 -8 77.29 6.9
 0 8 -8 70.09 7.3
 0 -8 8 63.39 6.5
 -1 8 -8 20.8 5.9
 -1 8 -8 13.7 3.7
 -2 8 -8 18.7 5.7
 -2 8 -8 14.5 4.1
 -3 8 -8 8.6 3.2
 -3 8 -8 7 3.5
 -3 8 -8 7.9 4.2
 -4 8 -8 2.5 1.7
 -4 8 -8 2.6 2.4
 -4 8 -8 3.2 3.2
 -4 8 -8 7.7 4.6
 -4 8 -8 5.8 2.1
 -4 8 -8 6.8 4.1
 -4 8 -8 0.7 2.5
 -5 8 -8 508.35 37.3
 -5 8 -8 484.25 39.5
 -5 8 -8 493.35 36.9
 -5 8 -8 539.55 36.6
 -5 8 -8 561.64 39.8
 -5 8 -8 628.24 41.8
 -6 8 -8 288.77 27.5
 -6 8 -8 367.36 26
 -6 8 -8 390.66 28.4
 -6 8 -8 373.06 25.9
 -6 8 -8 356.76 25
 -6 8 -8 384.36 25.5
 -7 8 -8 2 2.5
 -7 8 -8 1.3 2
 -7 8 -8 2.1 2.7
 -7 8 -8 0.9 2.1
 -8 8 -8 27.9 4
 -8 8 -8 27.2 5.1
 -8 8 -8 31.7 5
 -9 8 -8 24.1 4.7
 -9 8 -8 17.5 4.2
 -10 8 -8 5.4 2.8
 -10 8 -8 2.2 2.8
 -11 8 -8 26.1 4.4
 8 7 -8 -0.6 2.5
 7 7 -8 8.2 3.1
 -7 -7 8 1.3 3.7
 6 7 -8 7.4 3.4
 5 7 -8 124.29 11.1
 5 7 -8 140.79 10.7
 5 7 -8 107.39 10.1
 -5 -7 8 93.99 12
 4 7 -8 8.8 3.1
 4 7 -8 4.9 2.6
 4 7 -8 6.8 3.3
 -4 -7 8 6.4 3.6
 3 7 -8 45.2 5.4
 3 7 -8 42 5.9
 3 7 -8 45.7 5.6
 -3 -7 8 46.1 6.3
 2 7 -8 11.4 3
 2 7 -8 14.8 3.6
 2 7 -8 18.8 3.7
 -2 -7 8 17.2 3.7
 1 7 -8 35.4 4.9
 -1 -7 8 36.9 4.7
 0 7 -8 -0.2 3
 0 -7 8 6.6 2.1
 -1 7 -8 277.67 22.9
 -2 7 -8 2.6 2.6
 -2 7 -8 2.9 3.2
 -3 7 -8 17.2 4.3
 -3 7 -8 20.2 5.4
 -4 7 -8 112.89 10.7
 -4 7 -8 111.39 9.4
 -4 7 -8 91.69 11.2
 -5 7 -8 162.98 11.9
 -5 7 -8 178.98 14.7
 -5 7 -8 149.99 15.2
 -5 7 -8 148.49 12
 -5 7 -8 161.98 12.6
 -6 7 -8 5.2 2.1
 -6 7 -8 13.4 4.9
 -6 7 -8 3.7 2.1
 -6 7 -8 2.6 2.6
 -6 7 -8 8.4 3.8
 -6 7 -8 5 2.7
 -6 7 -8 2.3 3.7
 -7 7 -8 0.3 2.5
 -7 7 -8 1.4 2.4
 -7 7 -8 4.9 2.2
 -7 7 -8 0.1 1.4
 -7 7 -8 1.3 1.9
 -8 7 -8 267.57 19.7
 -8 7 -8 233.38 19
 -9 7 -8 3.5 3
 -9 7 -8 3.1 3
 -10 7 -8 152.78 13.2
 -11 7 -8 15.4 3.7
 8 6 -8 4.3 2.7
 7 6 -8 6.9 3.2
 -7 -6 8 6.6 4.8
 6 6 -8 320.77 24
 5 6 -8 185.18 13.5
 5 6 -8 166.38 14
 5 6 -8 158.88 13.2
 -5 -6 8 153.58 14.4
 4 6 -8 32.6 4.7
 4 6 -8 41.7 5
 4 6 -8 28.9 5
 -4 -6 8 44.1 6
 3 6 -8 77.49 7.2
 3 6 -8 67.39 7.2
 3 6 -8 69.59 6.9
 -3 -6 8 80.69 7.5
 -2 -6 8 0.7 1.8
 1 6 -8 24 7.4
 -1 -6 8 24.8 3.3
 0 -6 8 171.18 12.3
 -1 6 -8 151.68 10.6
 -2 6 -8 180.48 14.7
 -3 6 -8 27.8 6
 -3 6 -8 23.3 4.5
 -4 6 -8 48.6 7.5
 -4 6 -8 51.29 5.2
 -4 6 -8 54.19 6.7
 -5 6 -8 60.89 8.8
 -5 6 -8 73.09 8
 -5 6 -8 69.99 7
 -6 6 -8 7.4 2.4
 -6 6 -8 11.1 3.3
 -6 6 -8 8.6 2.2
 -6 6 -8 6.7 2.8
 -6 6 -8 19.8 5.6
 -6 6 -8 15.1 2.2
 -7 6 -8 233.68 18.1
 -7 6 -8 209.28 17.5
 -7 6 -8 260.47 16.9
 -7 6 -8 217.98 16.8
 -7 6 -8 236.18 17
 -8 6 -8 174.28 14.4
 -8 6 -8 189.38 15.2
 -9 6 -8 58.89 7.1
 -10 6 -8 127.79 11.6
 -11 6 -8 27.1 4.4
 8 5 -8 6.3 3
 -8 -5 8 0.3 3.9
 7 5 -8 9.3 3.4
 -7 -5 8 -0.5 3.8
 6 5 -8 0.9 2.6
 6 5 -8 0.5 2.5
 -6 -5 8 3.4 3.9
 5 5 -8 127.99 10.8
 5 5 -8 126.89 11.3
 -5 -5 8 136.99 11.9
 4 5 -8 483.85 34.9
 4 5 -8 503.85 34.7
 -4 -5 8 510.65 35.1
 -3 -5 8 279.77 20.3
 -2 -5 8 10.4 2.3
 -1 -5 8 132.89 9.9
 0 -5 8 24.3 2.8
 -1 5 -8 359.46 24
 -3 5 -8 1377.56 93.79
 -3 5 -8 1401.46 92.49
 -4 5 -8 25.5 4.3
 -4 5 -8 21.6 3.3
 -5 5 -8 4.7 2.1
 -5 5 -8 8.1 1.5
 -6 5 -8 0.6 1.6
 -6 5 -8 2 2.1
 -6 5 -8 1.8 1.2
 -6 5 -8 2 1.8
 -7 5 -8 0.8 1.7
 -7 5 -8 4.7 3
 -7 5 -8 5.5 2.7
 -7 5 -8 1.4 1.5
 -8 5 -8 38.8 5.8
 -9 5 -8 140.69 12.4
 -10 5 -8 22.8 4.5
 -11 5 -8 20.7 3.7
 8 4 -8 1.5 2.7
 -8 -4 8 2.2 4.2
 7 4 -8 7.7 3.2
 -7 -4 8 0.4 4.1
 6 4 -8 550.94 38.7
 6 4 -8 588.64 38.4
 -6 -4 8 536.35 42.6
 -6 -4 8 522.85 39.1
 5 4 -8 39.1 5.1
 5 4 -8 38.2 5.4
 -5 -4 8 49.3 5.9
 4 4 -8 15 4.7
 -4 -4 8 15.4 3.3
 -3 -4 8 4.2 2
 -2 -4 8 363.06 25.1
 -1 -4 8 -0.1 1.2
 0 -4 8 544.25 36.4
 -2 4 -8 298.97 20.6
 -3 4 -8 292.57 20.4
 -4 4 -8 122.99 8.7
 -4 4 -8 126.39 9.8
 -5 4 -8 26.8 4
 -5 4 -8 29.3 2.9
 -6 4 -8 261.97 21.7
 -6 4 -8 308.67 20.7
 6 -4 8 305.87 20.9
 -7 4 -8 49.1 4.7
 -7 4 -8 39.1 4.4
 -7 4 -8 26.3 4.8
 7 -4 8 45.4 4.9
 -8 4 -8 15.6 3.7
 8 -4 8 20 3.6
 8 -4 8 15.4 3.6
 -9 4 -8 53.89 6.6
 -10 4 -8 146.19 12.3
 -11 4 -8 12.8 3
 -10 -3 8 9.4 2.8
 -8 -3 8 30.8 7.6
 7 3 -8 122.29 10.4
 -7 -3 8 99.59 10.9
 6 3 -8 53.79 6.7
 -6 -3 8 72.89 10.2
 -6 -3 8 61.29 7.1
 -5 -3 8 79.69 7.8
 -4 -3 8 48 5.3
 -3 -3 8 1043.2 69.89
 -1 -3 8 91.39 7
 0 3 -8 32.3 2.9
 0 -3 8 27.4 2.8
 -1 3 -8 881.11 58.59
 1 -3 8 888.01 58.59
 -2 3 -8 676.73 46.5
 2 -3 8 713.03 46.8
 -3 3 -8 1050.79 69.29
 -3 3 -8 1088.89 69.99
 3 -3 8 1005.3 69.39
 -4 3 -8 53.29 4.3
 -4 3 -8 53.49 5.2
 4 -3 8 55.59 4.6
 -5 3 -8 1565.04 103.19
 -5 3 -8 1545.85 102.29
 5 -3 8 1517.55 102.39
 -6 3 -8 835.22 60.99
 -6 3 -8 932.61 60.49
 6 -3 8 925.81 60.49
 -7 3 -8 280.37 19.4
 -7 3 -8 208.08 19.1
 -7 3 -8 250.77 18.7
 7 -3 8 273.27 18.9
 7 -3 8 271.57 18.9
 -8 3 -8 6 2.7
 -8 3 -8 2.6 2.2
 8 -3 8 4.3 2.6
 8 -3 8 4.2 2.5
 -9 3 -8 122.89 10.8
 -10 3 -8 3 2.4
 -11 3 -8 3 2.1
 -10 -2 8 56.99 5.9
 -9 -2 8 11.9 2.7
 -9 -2 8 1.7 4
 8 2 -8 37.4 5.7
 -8 -2 8 61.89 10
 -8 -2 8 41.3 5
 7 2 -8 1.1 2.7
 -7 -2 8 3 3.1
 -7 -2 8 2.3 3.5
 -6 -2 8 17.5 5.6
 -6 -2 8 12.3 3.5
 -5 -2 8 26.6 4
 -4 -2 8 379.26 26.6
 -2 -2 8 11.7 2.2
 -1 -2 8 254.57 17.6
 0 2 -8 5.5 1.2
 0 -2 8 3.2 1.1
 -1 2 -8 21.8 2.3
 -1 2 -8 21.9 2.3
 1 -2 8 17.5 2.1
 -2 2 -8 2.8 1.5
 -2 2 -8 3.5 1
 2 -2 8 1.9 1.2
 -3 2 -8 57.49 4.3
 3 -2 8 46.7 4.4
 -4 2 -8 60.39 4.8
 4 -2 8 61.99 5.1
 4 -2 8 54.59 5
 -5 2 -8 252.67 17.7
 5 -2 8 254.87 17.8
 5 -2 8 246.68 17.8
 -6 2 -8 139.09 10
 -6 2 -8 111.39 10
 -6 2 -8 108.79 10.1
 6 -2 8 135.19 10.1
 6 -2 8 128.19 10
 -7 2 -8 128.69 10
 -7 2 -8 108.09 9.7
 -7 2 -8 108.19 8.9
 7 -2 8 114.59 9.7
 7 -2 8 108.49 9.5
 -8 2 -8 88.29 8.2
 -8 2 -8 91.39 7.4
 8 -2 8 76.29 8.2
 -9 2 -8 118.59 10.3
 -9 2 -8 117.59 9.4
 -10 2 -8 3.3 2.3
 -11 -1 8 3.5 2
 -10 -1 8 11.7 2.9
 -9 -1 8 -1.4 1.9
 -9 -1 8 2.6 3.8
 8 1 -8 111.19 10
 -8 -1 8 115.59 9
 -8 -1 8 103.69 13.2
 -8 -1 8 103.19 11
 -7 -1 8 8.8 4.6
 -7 -1 8 3.2 2.1
 -7 -1 8 7.6 3.1
 -6 -1 8 40.2 7.3
 -6 -1 8 38.1 5.2
 5 1 -8 39.7 4.6
 -5 -1 8 44.3 5.1
 -5 -1 8 45.5 7.1
 4 1 -8 74.79 6.2
 -4 -1 8 73.19 6.5
 3 1 -8 274.77 19.3
 -3 -1 8 282.57 19.6
 2 1 -8 40.4 3.7
 -2 -1 8 45.5 4.1
 1 1 -8 74.59 6.3
 -1 -1 8 93.09 6.5
 0 1 -8 533.15 34.9
 0 -1 8 504.45 34.8
 -1 1 -8 2389.56 163.28
 1 -1 8 2559.04 163.28
 -2 1 -8 551.54 36.2
 2 -1 8 524.95 36.3
 -3 1 -8 734.63 49.5
 3 -1 8 747.03 49.7
 -4 1 -8 46.4 4.4
 4 -1 8 53.09 4.7
 -5 1 -8 3.6 1.6
 5 -1 8 2.7 1.8
 -6 1 -8 110.29 9.3
 -6 1 -8 102.99 9.8
 -6 1 -8 138.29 9.9
 6 -1 8 126.39 10
 -7 1 -8 0.2 2
 -7 1 -8 0.3 1.8
 7 -1 8 2.8 2.3
 -8 1 -8 13 2.9
 -8 1 -8 13.5 3.4
 8 -1 8 16.2 4
 -9 1 -8 226.98 17.2
 -9 1 -8 224.78 16.5
 -10 1 -8 231.98 16.4
 -11 0 8 37.4 4.2
 -10 0 8 2 3.5
 -10 0 8 -2.3 1.9
 -9 0 8 45.5 4.7
 -9 0 8 36.1 7.9
 -8 0 8 114.49 13.4
 -8 0 8 115.79 9.4
 7 0 -8 91.39 8.6
 -7 0 8 113.09 12.2
 -7 0 8 85.89 8.8
 -7 0 8 75.49 7.5
 6 0 -8 34.8 4.7
 -6 0 8 40.5 7.1
 -6 0 8 33.8 4.8
 5 0 -8 36.1 4.2
 -5 0 8 38.3 6.3
 -5 0 8 33.5 4.4
 4 0 -8 27.1 3.3
 -4 0 8 23.2 3.6
 3 0 -8 1212.18 81.49
 -3 0 8 1238.28 81.69
 2 0 -8 37.1 3.6
 -2 0 8 42.4 3.9
 1 0 -8 1.1 1
 1 0 -8 3.9 1.3
 -1 0 8 1.7 1.3
 0 0 -8 1094.89 73.09
 0 0 8 1104.39 73.09
 -1 0 -8 193.38 13.5
 1 0 8 182.58 13.3
 -2 0 -8 44.1 3.9
 2 0 8 37.2 4.2
 -3 0 -8 185.78 13.2
 3 0 8 179.78 13.4
 -4 0 -8 2.8 1.4
 4 0 8 1.7 1.6
 -5 0 -8 101.09 8
 5 0 8 88.29 8.1
 -6 0 -8 7 2.3
 -6 0 -8 13 3.1
 6 0 8 11.7 3.1
 -7 0 -8 84.29 7.4
 -7 0 -8 82.39 7.7
 7 0 8 78.69 8.2
 -8 0 -8 335.37 22.5
 -8 0 -8 303.67 23
 8 0 8 305.57 25.7
 -9 0 -8 100.59 8.5
 -10 0 -8 30.8 3.7
 -11 1 8 12.2 2.6
 -10 1 8 10.5 4.8
 -10 1 8 20.2 3.1
 -9 1 8 61.99 9.9
 -9 1 8 79.19 6.6
 8 -1 -8 190.68 15.6
 -8 1 8 196.08 18.7
 -8 1 8 200.58 14.5
 7 -1 -8 145.09 11.9
 -7 1 8 153.38 15
 -7 1 8 142.79 12.2
 -7 1 8 135.29 10.9
 6 -1 -8 2.4 2.3
 6 -1 -8 1 1.8
 -6 1 8 1.4 3
 -6 1 8 2.8 2.1
 5 -1 -8 2.5 1.7
 -5 1 8 4.1 3.2
 -5 1 8 3 2.1
 4 -1 -8 755.42 51.09
 -4 1 8 758.02 51.19
 3 -1 -8 83.09 6.7
 -3 1 8 78.79 6.8
 2 -1 -8 259.07 18
 -2 1 8 256.17 18.1
 1 -1 -8 106.19 8
 1 -1 -8 103.99 7.9
 -1 1 8 103.99 8
 0 -1 -8 787.52 52.59
 0 -1 -8 739.43 52.79
 0 1 8 840.42 52.89
 -1 -1 -8 2646.94 165.08
 -1 -1 -8 2318.67 164.48
 1 1 8 2514.15 164.88
 -2 -1 -8 11.9 2.2
 2 1 8 10.6 2.5
 -3 -1 -8 21.3 3.2
 3 1 8 26.5 3.6
 -4 -1 -8 40.1 4.5
 4 1 8 46.4 5
 -5 -1 -8 49.1 4.8
 5 1 8 37.2 5
 -6 -1 -8 158.48 12.5
 -6 -1 -8 156.48 12.1
 6 1 8 158.28 13
 -7 -1 -8 54.09 6.2
 -7 -1 -8 58.79 6
 7 1 8 53.39 7.1
 -8 -1 -8 12 3
 -9 -1 -8 25.6 3.8
 -10 -1 -8 80.59 6.7
 -11 2 8 80.69 6.8
 -10 2 8 23.1 6.2
 -10 2 8 25.3 3.4
 -9 2 8 205.58 19
 -9 2 8 200.88 15
 8 -2 -8 33.6 5.5
 -8 2 8 40.5 4.5
 -8 2 8 42 8.3
 7 -2 -8 31.5 4.2
 7 -2 -8 35.3 5.1
 -7 2 8 35 5.4
 -7 2 8 33.6 4.2
 -7 2 8 36.9 7.3
 6 -2 -8 254.47 18.8
 -6 2 8 262.37 21.6
 -6 2 8 246.38 18.8
 5 -2 -8 54.69 5.7
 -5 2 8 63.79 7.8
 4 -2 -8 1288.37 86.79
 -4 2 8 1307.97 86.89
 3 -2 -8 5.8 1.9
 -3 2 8 8.2 2.2
 2 -2 -8 86.49 6.9
 2 -2 -8 79.69 7.1
 -2 2 8 92.39 7.2
 1 -2 -8 823.92 55.09
 1 -2 -8 799.62 55.19
 -1 2 8 845.92 55.29
 0 -2 -8 2348.86 158.58
 0 -2 -8 2540.35 158.98
 0 2 8 2311.37 158.88
 -1 -2 -8 85.29 6.8
 -1 -2 -8 73.69 6.3
 1 2 8 78.99 6.8
 -2 -2 -8 88.09 8.2
 2 2 8 104.49 8.2
 3 2 8 1184.48 79.59
 4 2 8 24.5 4
 -5 -2 -8 254.77 20
 -5 -2 -8 281.87 19.6
 5 2 8 291.67 20.7
 -6 -2 -8 7.5 2.6
 6 2 8 9.5 3.6
 -7 -2 -8 63.19 6.4
 7 2 8 56.89 7.7
 -8 -2 -8 16.9 3.3
 -9 -2 -8 18.3 3.2
 -10 -2 -8 53.19 5
 -11 3 8 28.4 6.6
 -11 3 8 25 3.4
 -10 3 8 28.1 3.9
 -10 3 8 39.3 7.8
 -9 3 8 16.5 2.9
 -9 3 8 13 5
 8 -3 -8 751.72 51.79
 -8 3 8 711.43 54.69
 -8 3 8 783.32 50.79
 7 -3 -8 64.79 7.9
 7 -3 -8 47.8 5.8
 -7 3 8 47.8 7.8
 -7 3 8 44.3 4.7
 -7 3 8 62.99 9.9
 6 -3 -8 41 5
 -6 3 8 43.4 4.6
 -6 3 8 38.8 5.1
 -6 3 8 37.2 6.7
 5 -3 -8 5.7 2.2
 -5 3 8 5.1 3.2
 -5 3 8 6.6 2.6
 4 -3 -8 601.14 40.3
 -4 3 8 576.64 40.3
 3 -3 -8 235.58 17
 -3 3 8 239.88 17.2
 2 -3 -8 102.09 8.4
 -2 3 8 112.29 8.7
 1 -3 -8 1122.09 75.49
 -1 3 8 1140.09 75.69
 0 -3 -8 212.68 15.4
 0 3 8 217.18 15.6
 -1 -3 -8 1235.58 82.39
 1 3 8 1232.48 82.59
 -2 -3 -8 442.56 31
 2 3 8 453.35 31.2
 3 3 8 34 4.8
 -4 -3 -8 -0.2 1.8
 4 3 8 0.8 2.2
 -5 -3 -8 297.57 20.7
 5 3 8 279.37 21.7
 -6 -3 -8 22.7 3.8
 6 3 8 20.6 4.8
 -7 -3 -8 137.89 11.2
 -8 -3 -8 234.08 17.2
 -9 -3 -8 0.4 2.1
 -12 4 8 2.8 1.7
 -11 4 8 49.99 4.9
 -11 4 8 47.7 7.7
 -10 4 8 19.9 5.8
 -10 4 8 23.3 4
 -10 4 8 16.7 3
 -9 4 8 0.1 2.6
 -9 4 8 4.9 2.2
 -9 4 8 3.2 3.5
 8 -4 -8 196.58 15.8
 -8 4 8 187.78 14.8
 -8 4 8 217.68 19
 7 -4 -8 2.6 2.2
 -7 4 8 1.6 1.7
 -7 4 8 0.9 3.2
 6 -4 -8 199.18 14.9
 -6 4 8 202.48 17.3
 -6 4 8 188.48 14.9
 -6 4 8 176.08 13.9
 5 -4 -8 51.49 5.8
 -5 4 8 60.69 7.7
 -5 4 8 52.29 5.9
 4 -4 -8 472.55 33.3
 -4 4 8 480.95 33.4
 -4 4 8 495.95 39.6
 3 -4 -8 193.58 14.8
 -3 4 8 212.68 15.2
 2 -4 -8 177.48 13.4
 -2 4 8 185.48 13.6
 1 -4 -8 157.88 11.5
 -1 4 8 143.39 11.6
 0 -4 -8 313.37 22.1
 0 4 8 311.57 22.2
 -1 -4 -8 -0.5 1.8
 1 4 8 1.5 1.8
 -2 -4 -8 364.26 27.2
 2 4 8 406.76 27.3
 -3 -4 -8 5.3 2.4
 3 4 8 5.1 2.5
 -4 -4 -8 2.7 2.1
 4 4 8 5.5 2.9
 -5 -4 -8 131.29 10.6
 5 4 8 129.69 11.8
 -6 -4 -8 130.49 10.6
 6 4 8 126.19 11.9
 -7 -4 -8 6.7 2.6
 -8 -4 -8 35.8 4.4
 -9 -4 -8 0.9 2
 9 4 8 0.4 2.2
 -12 5 8 0.1 1.4
 -11 5 8 -1.6 3.1
 -11 5 8 1.1 1.7
 -11 5 8 0.3 2.2
 -10 5 8 42.7 6
 -10 5 8 39.4 4.6
 -10 5 8 45.7 7.7
 -9 5 8 2.6 2
 -9 5 8 2.6 3.5
 8 -5 -8 57.49 6.9
 -8 5 8 54.19 5.7
 -8 5 8 74.69 9.9
 7 -5 -8 38.2 5.2
 -7 5 8 25.9 3.7
 -7 5 8 38.2 7.7
 6 -5 -8 193.58 15
 -6 5 8 174.98 14
 -6 5 8 206.88 17.6
 5 -5 -8 3 2
 -5 5 8 3.7 2.5
 -5 5 8 2.7 2.8
 4 -5 -8 291.87 21
 -4 5 8 299.57 23.1
 -4 5 8 285.87 21.2
 3 -5 -8 441.46 30.2
 -3 5 8 424.26 30.3
 2 -5 -8 30 3.9
 -2 5 8 28.1 3.9
 1 -5 -8 339.37 23.7
 -1 5 8 327.47 23.7
 0 -5 -8 312.67 23.6
 0 5 8 349.67 23.7
 -1 -5 -8 23.1 4.1
 1 5 8 30.9 4.1
 -2 -5 -8 2.1 2.6
 2 5 8 3.6 2.3
 -3 -5 -8 11.4 2.5
 3 5 8 9.8 3.3
 -4 -5 -8 43 5
 4 5 8 38.4 5.8
 -5 -5 -8 68.09 6.6
 5 5 8 62.49 7.9
 -6 -5 -8 13.8 3.1
 -7 -5 -8 146.29 11.5
 -8 -5 -8 18.7 3.2
 8 5 8 12.9 3.2
 -12 6 8 5.1 1.7
 -11 6 8 32.4 7.1
 -11 6 8 56.19 4.8
 -11 6 8 49.4 5.5
 -10 6 8 67.09 7.7
 -10 6 8 70.09 6.2
 -10 6 8 60.79 9.3
 -9 6 8 16.3 3
 -9 6 8 13.7 5.1
 8 -6 -8 51.99 6.6
 -8 6 8 55.79 9.3
 -8 6 8 62.89 5.8
 7 -6 -8 5 2.7
 -7 6 8 9.9 2.4
 -7 6 8 8.3 4.4
 6 -6 -8 145.69 12.1
 -6 6 8 134.49 13.8
 -6 6 8 153.48 14.6
 5 -6 -8 970.4 67.49
 -5 6 8 1020.2 69.99
 4 -6 -8 1032.9 67.89
 -4 6 8 1038.9 69.99
 -4 6 8 934.21 67.79
 3 -6 -8 1784.82 115.99
 -3 6 8 1692.93 115.99
 -3 6 8 1730.43 117.79
 2 -6 -8 125.29 10.2
 -2 6 8 119.39 10.1
 1 -6 -8 7 2.8
 -1 6 8 7.6 2.5
 0 -6 -8 6.2 2.7
 0 6 8 4.9 2.3
 -1 -6 -8 3.9 2.7
 1 6 8 1.6 2.2
 -2 -6 -8 49.4 5.3
 -2 -6 -8 33.1 5.3
 2 6 8 38.7 5.3
 -3 -6 -8 181.98 14.2
 3 6 8 195.98 15.2
 -4 -6 -8 160.28 12.2
 4 6 8 150.18 11.8
 4 6 8 153.08 13.3
 -5 -6 -8 40.7 5
 5 6 8 39.1 4.5
 -6 -6 -8 73.19 6.8
 6 6 8 61.19 6.9
 -7 -6 -8 18.5 3.4
 7 6 8 18.8 3.6
 -8 -6 -8 20.8 3
 -11 7 8 34.8 6.6
 -11 7 8 34.5 5
 -11 7 8 37.6 4
 -10 7 8 33.4 5.7
 -10 7 8 35.5 4.3
 -10 7 8 36.1 7.3
 -9 7 8 21.5 6.3
 -9 7 8 26.1 3.8
 8 -7 -8 9.1 3.1
 -8 7 8 11.4 5.3
 -8 7 8 7.3 2.4
 7 -7 -8 0.4 2.3
 -7 7 8 1.5 1.9
 -7 7 8 2.1 3.7
 -7 7 8 1.2 3.6
 6 -7 -8 520.45 37
 -6 7 8 558.94 40
 -6 7 8 493.55 38.5
 5 -7 -8 20.6 4
 4 -7 -8 130.79 10.3
 -4 7 8 106.29 11.9
 3 -7 -8 106.59 9.3
 -3 7 8 111.69 10.9
 -3 7 8 90.89 10.6
 2 -7 -8 149.49 12.4
 -2 7 8 153.38 12.2
 1 -7 -8 19.7 4.2
 -1 7 8 20.6 3.9
 -1 7 8 37.1 3.6
 -1 7 8 34.5 8.9
 0 -7 -8 45.4 5.7
 0 -7 -8 51.99 6.4
 0 7 8 52.09 6.1
 0 7 8 51.19 7.8
 0 7 8 53.59 5.1
 -1 -7 -8 61.89 6.5
 -1 -7 -8 61.69 7.4
 1 7 8 73.29 6.1
 1 7 8 62.39 8.7
 1 7 8 60.19 6.9
 -2 -7 -8 3.7 2.8
 -2 -7 -8 3.3 3.1
 2 7 8 4.7 3
 2 7 8 10.5 2.4
 -3 -7 -8 135.29 10.9
 3 7 8 125.19 11.6
 3 7 8 134.89 10.4
 -4 -7 -8 114.49 9.6
 4 7 8 104.59 8.8
 4 7 8 111.59 9.7
 -5 -7 -8 15.6 3.3
 5 7 8 17.3 2.9
 5 7 8 15.7 3.7
 -6 -7 -8 6.8 2.8
 6 7 8 8.8 3.1
 -7 -7 -8 102.59 8.3
 7 7 8 99.89 8.4
 -11 8 8 17.8 2.5
 -11 8 8 16.8 5
 -11 8 8 18.4 3.7
 -10 8 8 12.3 4.9
 -10 8 8 7.7 2.3
 -10 8 8 5.4 3.3
 -9 8 8 308.77 26
 -9 8 8 296.77 21.6
 -8 8 8 187.58 18.6
 -8 8 8 200.28 14.7
 7 -8 -8 341.17 25.6
 -7 8 8 366.26 29.2
 -7 8 8 337.37 27.2
 -7 8 8 337.67 24.5
 6 -8 -8 89.79 8.6
 -6 8 8 85.29 11.1
 -6 8 8 77.99 10
 5 -8 -8 38.1 5.5
 -5 8 8 45.6 7.8
 -5 8 8 44 7.7
 4 -8 -8 11.3 3.3
 -4 8 8 9.7 4.3
 -4 8 8 12.4 4.7
 3 -8 -8 431.76 31
 -3 8 8 459.05 29.6
 -3 8 8 425.76 33.3
 -3 8 8 430.16 32.8
 -3 8 8 400.76 32.3
 -2 8 8 31 6.8
 -2 8 8 28.2 3.5
 -2 8 8 37.2 6.8
 1 -8 -8 170.08 16
 -1 8 8 200.48 14.7
 -1 8 8 237.68 18.4
 -1 8 8 211.88 18
 0 -8 -8 7.7 3.3
 0 8 8 -0.5 4.2
 0 8 8 1.5 1.6
 -1 -8 -8 17.5 4
 -1 -8 -8 30.5 5.1
 1 8 8 18.6 3.1
 1 8 8 12.4 5.6
 -2 -8 -8 4.5 2.7
 -2 -8 -8 5.4 3.7
 2 8 8 6.8 2.1
 -3 -8 -8 0.7 2.7
 3 8 8 2.4 1.8
 -4 -8 -8 9.2 3.3
 4 8 8 11.9 3.3
 4 8 8 6.7 2.2
 -5 -8 -8 21.3 3.7
 5 8 8 15.8 3.6
 -6 -8 -8 32.7 4.2
 6 8 8 31.1 4.3
 -11 9 8 18.4 3.6
 -11 9 8 20 2.3
 -10 9 8 7.1 3.3
 -10 9 8 4.4 1.8
 -10 9 8 2 3.5
 -9 9 8 5.7 2.2
 -9 9 8 5.7 4.2
 -8 9 8 261.17 19.4
 -8 9 8 306.67 24.5
 -8 9 8 242.98 21.9
 7 -9 -8 -0.1 2.8
 -7 9 8 -0.5 3.4
 -7 9 8 4.7 4.1
 -7 9 8 -0.7 1.9
 6 -9 -8 174.78 14.6
 -6 9 8 198.88 16.6
 -6 9 8 155.68 16.9
 5 -9 -8 0.9 2.6
 -5 9 8 0.6 3.7
 -5 9 8 3.6 3.8
 4 -9 -8 40 6
 -4 9 8 51.49 8.9
 -4 9 8 48.1 5.4
 -4 9 8 44 8.1
 3 -9 -8 79.49 8.6
 -3 9 8 84.39 7
 -3 9 8 93.79 10.7
 -3 9 8 64.49 10.1
 -3 9 8 94.69 11.4
 2 -9 -8 5.6 3.1
 -2 9 8 0.2 3.5
 -2 9 8 -0.4 4.4
 -2 9 8 1.2 1.6
 1 -9 -8 82.89 8.4
 -1 9 8 73.29 6.4
 -1 9 8 59.49 9.2
 -1 9 8 75.39 10.3
 0 9 8 111.49 12.4
 0 9 8 110.29 9
 -1 -9 -8 23.3 4.7
 1 9 8 17.4 3.1
 1 9 8 17.6 5.9
 -2 -9 -8 5.1 2.8
 2 9 8 10 2.4
 2 9 8 5 5
 -3 -9 -8 -3.7 2.6
 3 9 8 2.7 1.8
 -4 -9 -8 74.29 7.7
 4 9 8 82.99 6.8
 -5 -9 -8 7.7 2.7
 -6 -9 -8 4.3 2.2
 -11 10 8 56.09 5.7
 -10 10 8 28.4 6.2
 -10 10 8 11.1 3.5
 -10 10 8 13.8 2.2
 -9 10 8 18.1 3
 -9 10 8 21.2 6.4
 -8 10 8 179.38 13.1
 -8 10 8 184.78 18
 -8 10 8 154.48 15.6
 -7 10 8 55.89 5.7
 -7 10 8 49 8.3
 6 -10 -8 0.4 4
 -6 10 8 1 3.6
 -6 10 8 0.2 3.9
 5 -10 -8 102.99 10.4
 -5 10 8 137.59 14.1
 -5 10 8 91.69 11.9
 4 -10 -8 323.77 24.1
 -4 10 8 339.57 27.3
 -4 10 8 306.57 22.5
 -4 10 8 305.47 25.7
 3 -10 -8 144.79 13.6
 -3 10 8 162.98 15.9
 -3 10 8 152.08 11.9
 -3 10 8 170.38 15.5
 -3 10 8 150.78 16.1
 2 -10 -8 71.59 8.2
 -2 10 8 81.29 11
 -2 10 8 66.99 9.5
 -2 10 8 69.19 6.5
 1 -10 -8 4 3.2
 -1 10 8 11.3 5
 -1 10 8 9.9 2.5
 -1 10 8 9.9 5.4
 0 -10 -8 7.4 4.9
 0 10 8 4 2
 0 10 8 -0.3 4.6
 1 10 8 103.79 8.7
 1 10 8 110.89 11.9
 2 10 8 33.8 4.1
 2 10 8 30.2 6.5
 -3 -10 -8 8 3.1
 3 10 8 13.1 2.6
 -4 -10 -8 9.9 2.9
 4 10 8 4.3 1.9
 -10 11 8 38.9 7.1
 -10 11 8 17.7 3.6
 -10 11 8 23.3 2.5
 -9 11 8 52.79 7
 -9 11 8 68.39 5.7
 -9 11 8 91.69 10.6
 -8 11 8 16.8 2.8
 -8 11 8 12.7 4.6
 -7 11 8 146.09 14.2
 -7 11 8 162.68 11.5
 -7 11 8 132.99 15.4
 -6 11 8 66.89 10.7
 -6 11 8 85.99 10.4
 -5 11 8 6.3 4.6
 -5 11 8 -0.5 3.9
 -4 11 8 11.5 2.7
 -4 11 8 11.9 5.1
 -4 11 8 9.9 4.8
 -3 11 8 0 1.8
 -3 11 8 -3.4 3.3
 -3 11 8 6.1 5.4
 -2 11 8 99.89 11.6
 -2 11 8 104.79 12.9
 -2 11 8 102.59 8.6
 -1 11 8 15.6 3
 -1 11 8 17.2 6.2
 0 11 8 32 6.9
 0 11 8 17.9 3.3
 1 11 8 74.69 10.1
 1 11 8 73.89 6.7
 2 11 8 186.08 17.9
 2 11 8 198.08 14.2
 3 11 8 108.79 8.5
 -10 12 8 23.8 3.4
 -9 12 8 13.2 4
 -9 12 8 3.7 1.3
 -9 12 8 3.6 4.3
 -9 12 8 2 2.2
 -8 12 8 426.96 30.3
 -8 12 8 386.06 31.4
 -8 12 8 468.75 29.1
 -7 12 8 233.48 15.3
 -7 12 8 189.08 18
 -6 12 8 42.6 7.9
 -6 12 8 57.49 9
 -5 12 8 64.49 9.4
 -4 12 8 51.39 5.3
 -4 12 8 49.2 8.2
 -3 12 8 95.49 8.2
 -3 12 8 97.29 11.2
 -2 12 8 23.3 6.9
 -2 12 8 24 6.2
 -2 12 8 26.7 3.9
 -1 12 8 57.69 8.7
 -1 12 8 41.4 5
 0 12 8 38.5 7.1
 0 12 8 36.7 4.5
 1 12 8 5.9 2.2
 1 12 8 13.6 4.7
 2 12 8 3.1 1.8
 -8 13 8 11.3 3.7
 -8 13 8 20.7 6.2
 -7 13 8 11.4 4.2
 -7 13 8 13.2 2
 -7 13 8 4.7 4.4
 -6 13 8 0 1.6
 -6 13 8 -0.9 3.5
 -5 13 8 37.8 6.9
 -5 13 8 37.1 4.2
 -4 13 8 13.2 4.9
 -4 13 8 9.3 2.4
 -3 13 8 38.1 6.7
 -3 13 8 38.1 4.4
 -2 13 8 36.4 4.3
 -1 13 8 5.3 2.1
 -1 13 8 -0.6 4
 0 13 8 -0.2 1.7
 1 13 8 -1.9 1.4
 -7 14 8 -0.4 2.7
 -6 14 8 0.4 2.9
 -6 14 8 4.1 1.3
 -5 14 8 12.5 3.1
 -5 14 8 15.8 4.3
 -4 14 8 2.1 1.7
 -4 14 8 3.5 3.2
 -3 14 8 22.7 4.8
 -3 14 8 31.2 3.5
 -2 14 8 11.2 2.3
 -1 14 8 12.1 2.2
 -1 15 -9 0.6 2.5
 -2 15 -9 0.1 2.6
 -2 15 -9 -0.4 1.7
 -3 15 -9 1.8 2.5
 -3 15 -9 1.1 1.7
 -4 15 -9 0.3 1.8
 -4 15 -9 0.1 2.9
 -5 15 -9 9 2.4
 -5 15 -9 12.6 3.9
 -6 15 -9 -0.6 1.7
 -6 15 -9 1.4 2.8
 -7 15 -9 14.1 3.8
 -7 15 -9 13.4 2.5
 -7 15 -9 14.3 2.5
 1 14 -9 60.79 6.8
 1 14 -9 69.29 7
 0 14 -9 -1.7 2.6
 0 14 -9 -0.3 2.9
 -1 14 -9 1.9 3.5
 -1 14 -9 -1.1 2.8
 -2 14 -9 48.6 5.2
 -2 14 -9 44.5 6.4
 -2 14 -9 62.39 7.8
 -3 14 -9 22.1 4.8
 -3 14 -9 19.9 3.3
 -3 14 -9 27.5 5.6
 -4 14 -9 2.5 3.9
 -4 14 -9 3.4 3.2
 -4 14 -9 1 2.1
 -5 14 -9 -1.7 3.4
 -5 14 -9 3.1 2.2
 -5 14 -9 1.3 2.2
 -6 14 -9 27.8 4.1
 -6 14 -9 34.2 6.3
 -6 14 -9 30.1 4
 -7 14 -9 -0.8 1.9
 -7 14 -9 0.1 3
 -7 14 -9 2.1 2.1
 -8 14 -9 9.8 2.5
 -8 14 -9 8 2.3
 -8 14 -9 9 3.6
 -9 14 -9 0.2 1.6
 3 13 -9 8.1 2.7
 2 13 -9 4.6 2.9
 2 13 -9 -0.2 2.3
 1 13 -9 3.4 2.9
 1 13 -9 3.5 3.2
 0 13 -9 31.7 5.1
 0 13 -9 25.5 4.2
 0 13 -9 34.8 5.4
 -1 13 -9 30 3.8
 -1 13 -9 30.6 5.4
 -1 13 -9 18.7 4.7
 -2 13 -9 9.5 2.7
 -2 13 -9 14.5 5
 -2 13 -9 11.2 4.2
 -3 13 -9 2.9 2.4
 -3 13 -9 6.1 4.5
 -3 13 -9 -2.7 3.3
 -4 13 -9 2.5 3.7
 -4 13 -9 7.3 4.6
 -4 13 -9 8.5 2.8
 -4 13 -9 10.3 2.9
 -5 13 -9 -0.5 4.1
 -5 13 -9 2.8 2.5
 -5 13 -9 -1.2 2.3
 -6 13 -9 -1.3 2.3
 -6 13 -9 1.7 4
 -6 13 -9 0.7 2.3
 -7 13 -9 31.2 4.3
 -7 13 -9 22.6 5.8
 -7 13 -9 29.7 4.1
 -8 13 -9 2.2 2.2
 -8 13 -9 5.9 3.8
 -8 13 -9 4.6 2.3
 -9 13 -9 1.8 1.9
 4 12 -9 0.8 2.3
 3 12 -9 9.7 3.3
 3 12 -9 9.6 3.1
 2 12 -9 7.4 3.5
 2 12 -9 3.1 2.9
 1 12 -9 11.8 3.6
 1 12 -9 6.5 2.8
 1 12 -9 6.8 3.7
 0 12 -9 2.3 2.3
 0 12 -9 1.6 3.2
 0 12 -9 5.7 3.3
 -1 12 -9 8.7 3.9
 -1 12 -9 14.7 3.3
 -1 12 -9 13.9 4.1
 -1 12 -9 14.1 3
 -1 12 -9 24.5 5.5
 -2 12 -9 234.28 19
 -2 12 -9 205.68 15.8
 -2 12 -9 193.08 17.4
 -3 12 -9 3.8 3.8
 -3 12 -9 3.5 4.1
 -3 12 -9 4.7 2.5
 -3 12 -9 -1 2
 -4 12 -9 15.2 3.5
 -4 12 -9 16.7 5.9
 -4 12 -9 13.8 3.5
 -4 12 -9 22.6 5.3
 -5 12 -9 70.59 10.2
 -5 12 -9 56.19 6.3
 -5 12 -9 52.99 6.6
 -6 12 -9 218.38 16.9
 -6 12 -9 238.78 20.2
 -6 12 -9 213.28 17
 -7 12 -9 18.7 3.9
 -7 12 -9 21.7 6.1
 -7 12 -9 26.3 4.2
 -8 12 -9 27.1 4.1
 -8 12 -9 26.2 4
 -8 12 -9 22.6 5.7
 -9 12 -9 164.98 12.7
 -10 12 -9 10.1 2.3
 5 11 -9 0.5 2.2
 4 11 -9 25.4 4.1
 4 11 -9 23.1 4.3
 3 11 -9 -3.1 3
 3 11 -9 0.7 2.6
 2 11 -9 2.9 3.5
 2 11 -9 1.6 2.7
 2 11 -9 1.8 2.5
 1 11 -9 7.3 3.5
 1 11 -9 3.1 2.6
 1 11 -9 8.9 3.5
 0 11 -9 95.59 9.9
 0 11 -9 99.69 9
 0 11 -9 99.99 9.9
 -1 11 -9 72.99 6.7
 -1 11 -9 80.39 9.5
 -1 11 -9 55.59 6.5
 -1 11 -9 60.59 7.5
 -1 11 -9 42.7 6.9
 -2 11 -9 91.89 8.3
 -2 11 -9 92.69 11.1
 -2 11 -9 88.59 8.8
 -2 11 -9 86.59 9.8
 -3 11 -9 192.08 16.1
 -3 11 -9 189.38 17.4
 -3 11 -9 175.68 14
 -3 11 -9 174.48 14.1
 -4 11 -9 31.9 4.8
 -4 11 -9 36.5 7.6
 -4 11 -9 26.3 6.1
 -4 11 -9 33.2 4.7
 -4 11 -9 30.2 3.8
 -5 11 -9 11.3 3.3
 -5 11 -9 13.9 3.5
 -5 11 -9 18.4 3
 -5 11 -9 7.2 5.1
 -6 11 -9 2.1 3.1
 -6 11 -9 -1.5 1.9
 -6 11 -9 1.8 4.3
 -6 11 -9 4.4 4.8
 -6 11 -9 11.3 3.4
 -7 11 -9 2.4 2.6
 -7 11 -9 6.1 2.8
 -7 11 -9 0 3.8
 -7 11 -9 2.4 4.4
 -8 11 -9 10.5 3.1
 -8 11 -9 11.4 3.3
 -8 11 -9 9 4.6
 -9 11 -9 5.3 2.8
 -9 11 -9 3.7 2.8
 -10 11 -9 1.5 2.1
 -10 11 -9 -1.8 1.8
 6 10 -9 18.4 3.2
 5 10 -9 1.2 2.5
 5 10 -9 -2.1 2.5
 4 10 -9 -0.4 2.5
 4 10 -9 1.7 2.9
 3 10 -9 72.79 8.1
 3 10 -9 87.49 8.4
 3 10 -9 86.39 8.9
 2 10 -9 8.2 3.2
 2 10 -9 6.4 3
 2 10 -9 9.3 3.5
 1 10 -9 81.19 8.2
 1 10 -9 75.99 7.7
 1 10 -9 70.09 8.1
 0 10 -9 0.7 2.8
 0 10 -9 0.6 2.7
 0 10 -9 -1.9 1.9
 -1 10 -9 42.6 5.5
 -1 10 -9 46.7 6.1
 -1 10 -9 47.6 5.5
 -1 10 -9 37.9 6.1
 -2 10 -9 6.3 3.3
 -2 10 -9 16.8 5.5
 -2 10 -9 9.3 3
 -2 10 -9 9.5 2.8
 -2 10 -9 10.5 2.9
 -3 10 -9 -0.7 3
 -3 10 -9 1.8 4.1
 -3 10 -9 0.4 2
 -3 10 -9 2.4 4.4
 -3 10 -9 -1 2.1
 -3 10 -9 -0.6 1.6
 -4 10 -9 31.5 7.5
 -4 10 -9 29.2 5.9
 -4 10 -9 33.6 4.7
 -4 10 -9 34 3.8
 -4 10 -9 30.1 8
 -4 10 -9 30.5 4.5
 -5 10 -9 90.89 12.3
 -5 10 -9 65.59 10.6
 -5 10 -9 73.79 7.8
 -5 10 -9 79.69 7.9
 -5 10 -9 78.89 6.7
 -6 10 -9 415.46 28.3
 -6 10 -9 443.66 29.3
 -6 10 -9 454.45 29.3
 -6 10 -9 365.96 33
 -6 10 -9 368.66 31.8
 -7 10 -9 349.96 26
 -7 10 -9 395.26 30.4
 -7 10 -9 315.57 28.3
 -7 10 -9 363.56 25.2
 -7 10 -9 360.16 25.8
 -8 10 -9 7.4 2.9
 -8 10 -9 12 3
 -8 10 -9 10.1 3.3
 -9 10 -9 95.89 9.1
 -9 10 -9 96.69 9
 -10 10 -9 8.6 2.7
 -10 10 -9 7.3 2.8
 -11 10 -9 3.5 2
 6 9 -9 7.8 2.9
 -6 -9 9 1.8 3.4
 5 9 -9 0 2.7
 5 9 -9 0.1 2.4
 4 9 -9 14.8 4.2
 4 9 -9 11.9 3.6
 4 9 -9 14.3 3.6
 3 9 -9 7.6 3
 3 9 -9 10.5 4
 3 9 -9 10.3 3.2
 2 9 -9 8.2 3.2
 2 9 -9 12.7 3.4
 2 9 -9 13.8 3.9
 -2 -9 9 9.7 3.6
 1 9 -9 1.5 2.7
 1 9 -9 3.2 2.7
 1 9 -9 -0.3 2.1
 -1 -9 9 4 3
 0 9 -9 99.99 8.5
 0 9 -9 83.79 10.5
 0 9 -9 83.49 8.8
 0 9 -9 107.59 9.4
 -1 9 -9 27.8 5.5
 -1 9 -9 47.8 6.2
 -1 9 -9 42.6 4.6
 -1 9 -9 32.1 6.8
 -1 9 -9 32.7 4.7
 -1 9 -9 39.4 4.9
 -2 9 -9 51.39 6.5
 -2 9 -9 49.4 5.6
 -2 9 -9 48.2 5.8
 -2 9 -9 54.29 5.5
 -2 9 -9 47.1 8
 -3 9 -9 -0.1 3.5
 -3 9 -9 1.8 3
 -3 9 -9 3.2 2.3
 -3 9 -9 2.3 4.1
 -3 9 -9 5.7 2.4
 -3 9 -9 0.3 1.7
 -4 9 -9 184.08 14.6
 -4 9 -9 174.48 18.2
 -4 9 -9 210.88 16.9
 -4 9 -9 235.58 20.1
 -4 9 -9 211.08 18.3
 -4 9 -9 197.08 15.3
 -4 9 -9 212.78 15.7
 -5 9 -9 38.1 4.3
 -5 9 -9 43.6 5.4
 -5 9 -9 52.49 9.1
 -5 9 -9 32.7 7.1
 -5 9 -9 42.5 5.4
 -5 9 -9 38.9 7.9
 -6 9 -9 189.48 14.4
 -6 9 -9 189.88 15
 -6 9 -9 184.38 17.8
 -6 9 -9 211.98 19.3
 -6 9 -9 198.78 15.5
 -7 9 -9 169.08 14.8
 -7 9 -9 182.88 17.1
 -7 9 -9 208.48 18.6
 -7 9 -9 187.58 14
 -7 9 -9 185.08 14.4
 -7 9 -9 175.88 14.7
 -8 9 -9 4.5 2.9
 -8 9 -9 4.6 2.9
 -8 9 -9 2.6 2.4
 -9 9 -9 7.6 3.3
 -9 9 -9 10.6 3.3
 -10 9 -9 31.9 4.6
 -10 9 -9 39.3 5.5
 -11 9 -9 6.6 2.6
 7 8 -9 4.8 2.6
 6 8 -9 27.8 4.6
 -6 -8 9 13.7 5.2
 5 8 -9 0.3 2.8
 5 8 -9 2.2 3.1
 5 8 -9 -0.1 2.5
 4 8 -9 4 3.2
 4 8 -9 2.2 2.7
 4 8 -9 6 3
 3 8 -9 147.89 12.3
 3 8 -9 153.88 12.2
 3 8 -9 146.29 12.8
 -3 -8 9 136.19 12.6
 2 8 -9 208.38 14.6
 2 8 -9 179.78 14.9
 2 8 -9 181.08 14.7
 -2 -8 9 168.18 14.7
 1 8 -9 200.98 14.1
 1 8 -9 185.68 14.2
 1 8 -9 171.38 14.2
 -1 -8 9 151.48 13.8
 0 8 -9 280.67 20.9
 0 8 -9 304.97 23.6
 0 8 -9 282.47 21.2
 0 8 -9 287.17 21.5
 -1 8 -9 96.29 11.6
 -1 8 -9 93.49 9.1
 -2 8 -9 47.1 5.8
 -2 8 -9 33.7 4.5
 -2 8 -9 28 7.2
 -2 8 -9 30.9 4.4
 -3 8 -9 2.3 3.9
 -3 8 -9 2.2 1.7
 -3 8 -9 3 2.9
 -3 8 -9 5.7 2.4
 -3 8 -9 -0.4 3
 -3 8 -9 4.9 2
 -4 8 -9 573.64 47.3
 -4 8 -9 539.95 45.7
 -4 8 -9 711.73 43.8
 -4 8 -9 649.04 44.8
 -4 8 -9 703.13 44.1
 -4 8 -9 620.44 43.2
 -4 8 -9 696.73 46.9
 -5 8 -9 1.2 1.8
 -5 8 -9 9.8 2.7
 -5 8 -9 8.9 3.2
 -5 8 -9 3.4 3.5
 -5 8 -9 18.7 5.2
 -5 8 -9 1.2 3.5
 -6 8 -9 162.38 13.3
 -6 8 -9 166.08 12.3
 -6 8 -9 175.08 12.8
 -6 8 -9 159.78 15.4
 -6 8 -9 154.18 16.4
 -6 8 -9 163.98 13.3
 -7 8 -9 124.99 9.8
 -7 8 -9 118.59 10
 -7 8 -9 123.99 10.8
 -7 8 -9 114.79 10.7
 -8 8 -9 143.19 12.7
 -8 8 -9 156.68 13
 -9 8 -9 280.37 20
 -9 8 -9 230.78 19
 -10 8 -9 1.8 2.8
 -11 8 -9 36.8 5
 8 7 -9 20.9 3.5
 7 7 -9 13 3.5
 -7 -7 9 5 3.9
 6 7 -9 2.9 3.1
 -6 -7 9 0.2 3.9
 5 7 -9 1.1 2.5
 5 7 -9 1.5 3
 4 7 -9 22 3.9
 4 7 -9 21.3 4.6
 4 7 -9 15.3 3.6
 -4 -7 9 12.4 4.4
 3 7 -9 134.09 10.7
 3 7 -9 108.59 10.9
 3 7 -9 108.99 10.3
 -3 -7 9 154.18 11.7
 2 7 -9 63.49 6.8
 2 7 -9 60.19 6.9
 2 7 -9 70.29 6.6
 -2 -7 9 63.29 6.9
 1 7 -9 201.68 15.9
 1 7 -9 187.68 15.4
 1 7 -9 204.28 15.1
 -1 -7 9 208.58 15
 0 7 -9 86.59 11
 0 7 -9 108.19 9.2
 -1 7 -9 35.8 7.2
 -1 7 -9 58.89 8
 -2 7 -9 12 4.6
 -2 7 -9 6.7 3.3
 -3 7 -9 14.8 4.8
 -3 7 -9 6.1 3
 -4 7 -9 58.69 7.6
 -4 7 -9 64.79 5.9
 -4 7 -9 60.59 6.9
 -4 7 -9 78.99 9.6
 -5 7 -9 0.6 2.3
 -5 7 -9 0.4 1.4
 -5 7 -9 -0.1 1.8
 -5 7 -9 3.5 3.4
 -5 7 -9 4.5 3.7
 -6 7 -9 34.1 3.4
 -6 7 -9 29.8 4.8
 -6 7 -9 40.2 4.6
 -6 7 -9 32.5 4.1
 -6 7 -9 30 5.1
 -6 7 -9 41.1 6.9
 -6 7 -9 30.1 7.1
 -7 7 -9 286.07 22.6
 -7 7 -9 337.77 22.1
 -7 7 -9 272.27 25.5
 -7 7 -9 315.57 23.2
 -7 7 -9 334.77 22.1
 -7 7 -9 312.27 22.1
 -8 7 -9 -3.4 2.6
 -8 7 -9 1.3 2.6
 -9 7 -9 26.4 4.9
 -9 7 -9 33.3 6.2
 -10 7 -9 43.5 6.3
 -11 7 -9 2.3 2.4
 8 6 -9 3.2 2.6
 7 6 -9 5.5 3
 -7 -6 9 2.8 4.2
 6 6 -9 79.09 7.9
 6 6 -9 69.79 8.4
 -6 -6 9 83.29 11.7
 5 6 -9 58.09 6.2
 5 6 -9 52.19 6.8
 -5 -6 9 44.9 7.2
 4 6 -9 -0.2 2
 4 6 -9 1.2 2.5
 -4 -6 9 3.7 3.1
 3 6 -9 13.1 3
 3 6 -9 13.8 3.5
 -3 -6 9 23.7 3.9
 2 6 -9 2.8 2.4
 -2 -6 9 5.4 2.4
 1 6 -9 97.99 10.8
 -1 -6 9 91.59 7.8
 0 6 -9 247.48 20.3
 0 -6 9 239.08 17
 -1 6 -9 161.98 14.9
 -2 6 -9 99.49 10.7
 -3 6 -9 738.03 53.19
 -4 6 -9 1125.19 72.49
 -4 6 -9 1032.5 75.69
 -5 6 -9 11.2 4.4
 -5 6 -9 7.7 2.3
 -5 6 -9 15.1 3.8
 -5 6 -9 12.9 1.7
 -5 6 -9 14 2.7
 -6 6 -9 59.19 5.8
 -6 6 -9 65.69 9.4
 -6 6 -9 55.29 6
 -6 6 -9 75.89 5.5
 -6 6 -9 54.59 6.7
 -6 6 -9 61.29 6.8
 -7 6 -9 195.98 13.4
 -7 6 -9 175.28 14.7
 -7 6 -9 160.98 13.4
 -7 6 -9 171.68 14.2
 -7 6 -9 191.18 17.8
 -8 6 -9 19.8 5.6
 -8 6 -9 22.5 4.6
 -9 6 -9 5.1 3.2
 -10 6 -9 -1 2.6
 -11 6 -9 60.69 6.3
 -8 -5 9 18.7 5.9
 7 5 -9 37.5 5.7
 -7 -5 9 41.1 8.7
 6 5 -9 103.49 10.3
 6 5 -9 108.59 9.8
 -6 -5 9 124.89 14.6
 -6 -5 9 107.19 11.2
 5 5 -9 -3.1 2.2
 5 5 -9 2.3 2.4
 -5 -5 9 -0.1 2.9
 4 5 -9 23.1 3.7
 4 5 -9 20.7 3.9
 -4 -5 9 18.7 3.9
 3 5 -9 305.17 23.7
 -3 -5 9 362.46 23.9
 -2 -5 9 133.59 10.4
 -1 -5 9 241.38 17.1
 0 -5 9 134.39 9.8
 -3 5 -9 588.64 40
 -4 5 -9 41.5 4.6
 -5 5 -9 21.4 3.5
 -5 5 -9 24.8 2.6
 -6 5 -9 24.5 3
 -6 5 -9 21.8 3.4
 -6 5 -9 23.6 3.9
 -6 5 -9 22.8 3.2
 -6 5 -9 28.7 4.6
 -7 5 -9 113.39 9.5
 -7 5 -9 119.59 9.6
 -7 5 -9 136.19 10.9
 -8 5 -9 194.18 15.7
 -9 5 -9 88.49 9.1
 -10 5 -9 138.49 11.9
 -11 5 -9 20.3 3.7
 8 4 -9 16.9 4.1
 -8 -4 9 23.4 6.7
 7 4 -9 24.6 4.8
 -7 -4 9 49.7 9.4
 6 4 -9 151.58 13
 6 4 -9 147.29 12.5
 -6 -4 9 172.98 13.9
 5 4 -9 147.29 12.4
 5 4 -9 141.39 11.8
 -5 -4 9 160.28 12.6
 4 4 -9 8.1 3
 -4 -4 9 12.3 3.1
 -3 -4 9 28.4 3.9
 -2 -4 9 7.5 2.1
 0 -4 9 59.09 4.8
 -1 4 -9 71.59 5.3
 -2 4 -9 10.4 1.9
 -3 4 -9 848.02 56.89
 -4 4 -9 1330.37 88.39
 -4 4 -9 1343.77 89.39
 -5 4 -9 102.69 7.6
 -5 4 -9 94.89 8.5
 -6 4 -9 153.68 12.1
 -6 4 -9 181.68 12.3
 -7 4 -9 395.46 27.4
 -7 4 -9 367.66 26.4
 -7 4 -9 369.46 26.1
 -8 4 -9 22.1 4.3
 -9 4 -9 103.19 9.8
 -10 4 -9 6.4 2.9
 -11 4 -9 150.08 11.8
 -9 -3 9 21.5 6.2
 8 3 -9 3 2.8
 -8 -3 9 2.7 4.1
 7 3 -9 211.08 14.7
 -7 -3 9 155.98 14.9
 -7 -3 9 155.48 17.7
 -6 -3 9 341.97 24.7
 -6 -3 9 326.07 28.3
 5 3 -9 328.17 26.3
 -5 -3 9 355.36 25
 -4 -3 9 11.4 2.8
 -3 -3 9 16.9 3
 -2 -3 9 46.3 4.7
 -1 -3 9 -0.6 1.2
 0 3 -9 401.56 26.7
 0 -3 9 386.46 26.6
 -1 3 -9 460.75 31.1
 1 -3 9 469.45 31.1
 -2 3 -9 1779.42 123.09
 -2 3 -9 1954.2 123.49
 -3 3 -9 1408.66 93.99
 -3 3 -9 1416.26 93.39
 -4 3 -9 50.59 4.2
 -4 3 -9 52.09 5.1
 4 -3 9 45.9 4.5
 -5 3 -9 13.8 3
 -5 3 -9 17.6 2.5
 5 -3 9 21.1 2.9
 5 -3 9 17.2 2.7
 -6 3 -9 6.6 1.9
 -6 3 -9 0.9 2.5
 -6 3 -9 3.2 2.3
 6 -3 9 4.4 2
 6 -3 9 7.8 2.2
 -7 3 -9 315.67 22.5
 -7 3 -9 316.57 23.1
 7 -3 9 308.77 22.6
 -8 3 -9 21.1 4.2
 8 -3 9 23.1 4.2
 -9 3 -9 146.19 12.3
 -10 3 -9 26.1 4.3
 -11 3 -9 11.3 2.7
 -9 -2 9 -0.4 3.8
 -9 -2 9 0.2 2.2
 8 2 -9 9.6 3.3
 -8 -2 9 4.5 4.7
 7 2 -9 52.59 6.8
 -7 -2 9 55.39 7.2
 -7 -2 9 59.59 10
 -6 -2 9 803.62 54.89
 -6 -2 9 791.82 58.39
 -5 -2 9 398.56 28.3
 -4 -2 9 171.08 13
 -2 -2 9 2.6 1.6
 -1 -2 9 544.85 36.7
 0 2 -9 80.29 6.3
 0 -2 9 86.29 6.4
 -1 2 -9 634.64 45.1
 -1 2 -9 695.73 45.3
 1 -2 9 703.93 45.2
 -2 2 -9 774.52 50.19
 -2 2 -9 736.13 50.09
 2 -2 9 741.03 50.09
 -3 2 -9 99.59 7.3
 3 -2 9 94.69 7.6
 -4 2 -9 87.59 6.7
 4 -2 9 83.39 7
 -5 2 -9 47.1 4.6
 5 -2 9 50.59 5
 -6 2 -9 7.5 2
 -6 2 -9 3.8 2.4
 -6 2 -9 2.4 1.8
 6 -2 9 5 2.2
 -7 2 -9 212.48 15.9
 -7 2 -9 222.78 17
 -7 2 -9 233.88 18.4
 7 -2 9 222.28 16.8
 -8 2 -9 2.3 2.4
 -8 2 -9 4 2.1
 8 -2 9 4.5 2.8
 -9 2 -9 77.29 7.7
 -10 2 -9 22 3.8
 -10 -1 9 2.1 2.2
 9 1 -9 1.7 3.1
 -9 -1 9 -2.6 1.9
 -9 -1 9 0 3.5
 8 1 -9 285.07 21.3
 -8 -1 9 284.77 20.3
 -8 -1 9 283.07 25.2
 -7 -1 9 191.08 15.9
 -7 -1 9 203.78 19.3
 -6 -1 9 394.26 28.3
 -6 -1 9 395.96 31.4
 -5 -1 9 308.27 24.6
 -5 -1 9 293.57 21.7
 -4 -1 9 127.99 10.2
 -3 -1 9 40.4 4.3
 -2 -1 9 888.71 59.59
 1 1 -9 60.39 5.3
 -1 -1 9 70.09 5.5
 0 1 -9 30.9 3
 0 -1 9 23 2.9
 -1 1 -9 222.18 15.7
 -1 1 -9 229.68 15.4
 1 -1 9 218.68 15.6
 -2 1 -9 2144.09 139.09
 2 -1 9 2060.89 139.19
 -3 1 -9 106.79 8.3
 3 -1 9 112.59 8.7
 -4 1 -9 138.49 10.6
 4 -1 9 147.39 10.9
 -5 1 -9 164.78 12.2
 5 -1 9 159.98 12.5
 -6 1 -9 84.59 7.5
 -6 1 -9 88.79 7.8
 -6 1 -9 72.89 7
 6 -1 9 85.09 7.8
 -7 1 -9 38.4 4.6
 -7 1 -9 36.1 5.1
 7 -1 9 40 5.4
 -8 1 -9 10.7 3.2
 -8 1 -9 10.7 2.8
 8 -1 9 11.7 3.8
 -9 1 -9 3.3 2.6
 -9 1 -9 1.4 2.1
 -11 0 9 11.4 2.5
 -10 0 9 2.6 3.5
 -10 0 9 4.8 2.2
 9 0 -9 17.6 4.4
 -9 0 9 19.7 6.1
 -9 0 9 18.1 3.2
 -8 0 9 -1.7 3.2
 -8 0 9 4.3 2.1
 -8 0 9 0.5 3.5
 -7 0 9 353.96 27
 -7 0 9 428.96 31.3
 -7 0 9 334.67 25.8
 6 0 -9 118.49 10.3
 -6 0 9 121.39 10.6
 -6 0 9 134.49 13.4
 5 0 -9 -0.8 1.5
 -5 0 9 0.2 2.7
 -5 0 9 -0.5 1.6
 4 0 -9 0.9 1.4
 -4 0 9 0.8 2.6
 -4 0 9 0.3 1.8
 3 0 -9 74.29 6.3
 -3 0 9 82.49 6.8
 2 0 -9 1.2 1.1
 -2 0 9 1.2 1.4
 1 0 -9 2774.72 183.88
 -1 0 9 2790.92 183.78
 0 0 -9 135.09 10.1
 0 0 9 139.99 10.2
 -1 0 -9 597.04 41.7
 1 0 9 639.14 41.7
 -2 0 -9 800.62 54.19
 2 0 9 812.32 54.29
 -3 0 -9 1.6 1.4
 3 0 9 1.3 1.8
 -4 0 -9 185.08 13.7
 4 0 9 185.28 14
 -5 0 -9 339.07 22
 -5 0 -9 263.77 21.3
 5 0 9 310.97 22.1
 -6 0 -9 267.67 19.9
 -6 0 -9 303.67 20.7
 6 0 9 270.17 20.8
 -7 0 -9 27.8 4
 -7 0 -9 24.8 4.3
 7 0 9 23 4.7
 -8 0 -9 11.5 3.4
 -8 0 -9 11.9 2.8
 -9 0 -9 0 2.1
 -10 0 -9 13.3 3.6
 -11 1 9 135.49 10.2
 -10 1 9 -0.9 3.2
 -10 1 9 0.7 1.7
 9 -1 -9 24.6 6.4
 -9 1 9 25.9 3.7
 -9 1 9 18.4 5.9
 -8 1 9 9.8 4.9
 -8 1 9 10.8 2.6
 7 -1 -9 29 4.5
 -7 1 9 30.2 5
 -7 1 9 25.4 3.5
 -7 1 9 24.3 6.4
 6 -1 -9 63.09 6
 6 -1 -9 60.99 6.5
 -6 1 9 55.89 8.7
 -6 1 9 67.59 6.8
 -6 1 9 78.39 5.9
 5 -1 -9 99.09 8.6
 -5 1 9 108.49 11.3
 4 -1 -9 -0.5 1.4
 -4 1 9 -0.8 1.6
 3 -1 -9 68.29 5.7
 -3 1 9 57.99 5.8
 2 -1 -9 1320.47 88.39
 2 -1 -9 1321.27 88.09
 -2 1 9 1332.87 88.29
 1 -1 -9 1961.1 131.09
 1 -1 -9 1967.4 131.39
 -1 1 9 2016.9 131.39
 0 -1 -9 2961.6 203.48
 0 1 9 3200.28 203.58
 -1 -1 -9 1279.17 79.59
 1 1 9 1097.79 79.29
 -2 -1 -9 269.37 20.9
 2 1 9 330.67 21.2
 -3 -1 -9 158.88 12.3
 3 1 9 168.88 12.6
 -4 -1 -9 10.1 2.6
 4 1 9 14.7 3.2
 -5 -1 -9 1.3 2.2
 -5 -1 -9 0.3 1.9
 5 1 9 -0.2 2.2
 -6 -1 -9 1260.97 81.59
 -6 -1 -9 1184.78 82.09
 6 1 9 1208.48 82.59
 -7 -1 -9 425.66 30.8
 -7 -1 -9 465.85 30.4
 7 1 9 409.96 31.5
 -8 -1 -9 32.6 4.4
 -9 -1 -9 220.68 16
 -10 -1 -9 1.3 1.9
 -11 2 9 33.1 4
 -10 2 9 4.4 1.9
 -10 2 9 2.1 3.5
 -9 2 9 0.7 1.7
 -9 2 9 -0.7 3.1
 8 -2 -9 330.57 24.9
 -8 2 9 340.67 28.3
 -8 2 9 342.07 23.9
 7 -2 -9 444.26 30.9
 7 -2 -9 400.96 30
 -7 2 9 420.66 29.9
 -7 2 9 473.05 34.6
 -7 2 9 428.26 31.1
 6 -2 -9 9.9 2.8
 6 -2 -9 10.9 2.6
 -6 2 9 7.8 4.2
 -6 2 9 6.7 1.9
 -6 2 9 9 2.9
 5 -2 -9 30.4 4.1
 -5 2 9 25.9 5.6
 -5 2 9 27.5 4.3
 4 -2 -9 18.8 3
 -4 2 9 16 3.1
 3 -2 -9 85.59 7.2
 -3 2 9 85.59 7.4
 2 -2 -9 445.06 31.1
 -2 2 9 466.55 31.4
 1 -2 -9 151.88 11.7
 1 -2 -9 152.98 11.5
 -1 2 9 164.58 11.9
 0 -2 -9 1887.91 128.39
 0 -2 -9 1939.81 127.99
 0 2 9 1972.8 128.39
 -1 -2 -9 951.9 62.89
 -1 -2 -9 894.31 63.49
 1 2 9 951.5 62.79
 -2 -2 -9 543.55 38
 2 2 9 561.84 38
 3 2 9 74.59 7.1
 -4 -2 -9 187.08 14.1
 4 2 9 196.18 14.9
 -5 -2 -9 8.4 2.9
 -5 -2 -9 7.4 2.4
 5 2 9 7.5 3.1
 -6 -2 -9 26.3 4
 -6 -2 -9 22.1 4.4
 6 2 9 29.1 5.1
 -7 -2 -9 33.8 4.5
 -8 -2 -9 124.19 10.1
 -9 -2 -9 1.5 2.1
 -11 3 9 122.59 9.1
 -11 3 9 111.29 11.7
 -10 3 9 11 2.7
 -10 3 9 15.8 5.4
 -9 3 9 8.8 2.5
 -9 3 9 6.5 4.1
 8 -3 -9 27.1 4.7
 -8 3 9 18.7 5.8
 -8 3 9 31.7 3.9
 7 -3 -9 27.2 3.8
 7 -3 -9 27.7 4.5
 -7 3 9 27.7 3.5
 -7 3 9 23.8 4.6
 -7 3 9 25.1 6.4
 6 -3 -9 7 2.2
 6 -3 -9 9.7 2.8
 -6 3 9 11.9 2.3
 -6 3 9 5.6 3.6
 -6 3 9 7.2 2.7
 5 -3 -9 295.87 20.7
 -5 3 9 289.07 20.8
 -5 3 9 267.97 22.8
 4 -3 -9 431.36 29.9
 -4 3 9 409.06 29.9
 -4 3 9 444.66 32
 3 -3 -9 460.15 32.2
 -3 3 9 477.55 32.5
 2 -3 -9 12.5 2.3
 -2 3 9 12.7 2.7
 1 -3 -9 173.58 12.9
 -1 3 9 178.48 13.3
 0 -3 -9 1730.63 115.79
 0 3 9 1756.52 116.09
 -1 -3 -9 9.7 2.3
 1 3 9 9.6 2.6
 2 3 9 70.29 6.7
 3 3 9 321.57 23.3
 -4 -3 -9 239.78 19.8
 -4 -3 -9 236.78 16.9
 4 3 9 220.58 17.7
 -5 -3 -9 46.5 5.3
 5 3 9 41.8 6.1
 -6 -3 -9 14.9 3.2
 6 3 9 15 4.2
 -7 -3 -9 -1.2 2.1
 -8 -3 -9 0.2 2.1
 -9 -3 -9 8.1 2.6
 -11 4 9 5.2 2
 -11 4 9 5 3.6
 -10 4 9 49.9 5.1
 -10 4 9 51.49 6.5
 -10 4 9 47.2 8.1
 -9 4 9 48.6 8.6
 -9 4 9 57.59 5.6
 8 -4 -9 415.96 30.5
 -8 4 9 407.86 33.4
 -8 4 9 446.66 29.5
 7 -4 -9 263.37 19.7
 -7 4 9 240.88 18.6
 -7 4 9 279.87 22.8
 6 -4 -9 611.94 44.2
 6 -4 -9 677.03 45.1
 -6 4 9 657.33 44.2
 -6 4 9 646.94 47.7
 -6 4 9 659.93 45.2
 5 -4 -9 10.2 2.7
 -5 4 9 13.8 4.3
 -5 4 9 12.8 3.3
 4 -4 -9 115.59 9.5
 -4 4 9 109.29 11
 -4 4 9 125.89 9.9
 3 -4 -9 15.8 2.8
 -3 4 9 19.2 3.4
 2 -4 -9 212.78 15.8
 -2 4 9 223.48 16.2
 1 -4 -9 1404.96 94.19
 -1 4 9 1416.76 94.49
 0 -4 -9 38.7 4.7
 0 4 9 49.9 5.2
 -1 -4 -9 7 2.3
 1 4 9 4.9 2.3
 2 4 9 140.29 11.4
 -3 -4 -9 22 3.2
 3 4 9 16 3.6
 -4 -4 -9 48.9 5.5
 4 4 9 57.49 7
 -5 -4 -9 -1.1 2
 5 4 9 3.5 3.1
 -6 -4 -9 27.7 4.2
 -7 -4 -9 -0.4 2.2
 -8 -4 -9 47.3 5.1
 -9 -4 -9 10.5 2.2
 -11 5 9 43.2 4.4
 -11 5 9 37.1 7.2
 -10 5 9 6.6 3.1
 -10 5 9 8.2 2.2
 -10 5 9 5.8 3.8
 -9 5 9 -1.3 1.6
 -9 5 9 1.5 3.6
 8 -5 -9 57.99 6.8
 -8 5 9 57.79 5.7
 -8 5 9 60.79 9.5
 7 -5 -9 37 5.2
 -7 5 9 24.7 3.6
 -7 5 9 33.4 7
 6 -5 -9 391.76 27.7
 -6 5 9 376.96 30.2
 5 -5 -9 4.3 2.3
 -5 5 9 4.7 3.4
 -5 5 9 7.9 2.9
 4 -5 -9 247.28 17.8
 -4 5 9 253.37 18.1
 -4 5 9 221.98 19.4
 3 -5 -9 148.09 11
 -3 5 9 156.68 11.4
 -3 5 9 116.29 12.1
 2 -5 -9 767.22 50.49
 -2 5 9 713.03 50.49
 1 -5 -9 5.6 2.2
 -1 5 9 10.2 2.7
 0 -5 -9 1076.29 73.19
 0 5 9 1092.49 73.29
 -1 -5 -9 67.69 7.1
 1 5 9 73.49 7.1
 -2 -5 -9 80.49 8.6
 -2 -5 -9 99.69 8
 2 5 9 92.19 8.5
 -3 -5 -9 19.1 3.3
 3 5 9 24.6 4.3
 -4 -5 -9 289.27 20.5
 4 5 9 278.47 21.5
 -5 -5 -9 1.2 2.2
 5 5 9 2.1 3.3
 -6 -5 -9 6.3 2.6
 -7 -5 -9 37.5 4.8
 -8 -5 -9 7 2.3
 8 5 9 6 2.5
 -11 6 9 202.98 16.4
 -11 6 9 227.08 19
 -11 6 9 235.38 15.8
 -10 6 9 0.5 3.2
 -10 6 9 -1.1 2.7
 -10 6 9 -0.9 1.5
 -9 6 9 196.08 18.8
 -9 6 9 205.28 15
 8 -6 -9 58.09 6.8
 -8 6 9 57.19 9.4
 -8 6 9 60.19 6
 7 -6 -9 702.53 49.5
 -7 6 9 738.23 52.79
 -7 6 9 696.83 48.5
 6 -6 -9 0.6 2.2
 -6 6 9 -1.7 3.5
 -6 6 9 2.1 3.5
 5 -6 -9 205.88 16
 -5 6 9 236.88 18.3
 -5 6 9 188.98 17.9
 4 -6 -9 1000.6 65.49
 -4 6 9 923.31 67.29
 -4 6 9 968.3 65.59
 3 -6 -9 364.66 24.3
 -3 6 9 300.67 25.6
 -3 6 9 346.37 24.3
 2 -6 -9 1453.85 97.69
 -2 6 9 1455.05 97.59
 1 -6 -9 537.85 38.2
 -1 6 9 559.84 38.2
 0 -6 -9 284.77 21.2
 0 6 9 286.27 21.1
 -1 -6 -9 1 2.5
 -1 -6 -9 3 2.3
 1 6 9 1.8 2.2
 -2 -6 -9 105.69 10.4
 -2 -6 -9 116.19 9.7
 2 6 9 116.49 10.2
 -3 -6 -9 60.39 6.1
 3 6 9 45.4 6.3
 -4 -6 -9 21.4 3.5
 4 6 9 21 3.3
 4 6 9 14.4 4.2
 -5 -6 -9 10.9 3.2
 5 6 9 10 2.5
 -6 -6 -9 0.7 2.2
 6 6 9 -1.2 2.4
 -7 -6 -9 42.7 5.1
 7 6 9 47.2 5.3
 -8 -6 -9 23.2 3.1
 -11 7 9 34.8 6.4
 -11 7 9 25.3 3.2
 -11 7 9 22.4 4
 -10 7 9 -0.5 2.6
 -10 7 9 0.4 1.7
 -10 7 9 -0.2 3
 -9 7 9 30.1 4.4
 -9 7 9 44.3 8.5
 -8 7 9 151.18 15.7
 -8 7 9 143.49 11.6
 7 -7 -9 129.19 11.8
 -7 7 9 124.89 13.4
 -7 7 9 135.59 10.9
 -7 7 9 153.08 14.9
 6 -7 -9 102.89 9.8
 -6 7 9 94.69 11.4
 -6 7 9 124.59 12.6
 5 -7 -9 932.21 62.69
 -5 7 9 937.71 65.39
 -5 7 9 877.31 64.49
 4 -7 -9 1329.07 89.29
 -4 7 9 1318.57 91.49
 -4 7 9 1319.07 91.09
 3 -7 -9 44.9 5.8
 -3 7 9 51.59 7.4
 -3 7 9 46.8 5.7
 -3 7 9 36.2 7.2
 2 -7 -9 128.49 11.1
 -2 7 9 116.99 12.7
 -2 7 9 126.79 9.7
 -2 7 9 143.09 11.1
 1 -7 -9 34.1 5
 1 -7 -9 23.1 4
 -1 7 9 27.1 6.2
 -1 7 9 24.3 6
 -1 7 9 30.5 4.5
 -1 7 9 31.9 3.7
 0 -7 -9 13.8 3.3
 0 -7 -9 9.2 3.4
 0 7 9 12.4 3.3
 0 7 9 9.4 2.3
 0 7 9 6.2 4
 0 7 9 9.3 5.1
 -1 -7 -9 124.59 10.5
 -1 -7 -9 103.89 9.4
 1 7 9 77.69 11.3
 1 7 9 116.69 10
 1 7 9 107.89 8.7
 -2 -7 -9 158.78 15.4
 -2 -7 -9 153.78 12.3
 2 7 9 159.58 11.8
 2 7 9 142.39 12.8
 -3 -7 -9 47.2 5.8
 3 7 9 50.49 6.7
 3 7 9 45.7 5.1
 -4 -7 -9 229.08 16.9
 4 7 9 217.88 16.1
 -5 -7 -9 14.6 3.4
 5 7 9 17.6 3.7
 5 7 9 13.3 2.6
 -6 -7 -9 9.2 2.9
 6 7 9 16.1 3.2
 -7 -7 -9 4 2.2
 -11 8 9 13.1 2.2
 -11 8 9 14 3.1
 -10 8 9 91.19 7.3
 -10 8 9 90.09 8.9
 -10 8 9 74.79 10.2
 -9 8 9 5.9 2.3
 -9 8 9 1.5 3.9
 -8 8 9 19.6 6.2
 -8 8 9 12.6 3
 7 -8 -9 6.1 3
 -7 8 9 7 4.6
 -7 8 9 6.8 2.6
 -7 8 9 9.1 4.5
 6 -8 -9 28.6 5.1
 -6 8 9 30.9 6.5
 -6 8 9 28.4 6.9
 5 -8 -9 137.99 12.1
 -5 8 9 153.98 14.8
 -5 8 9 124.79 13.6
 4 -8 -9 8.7 3.2
 -4 8 9 5.1 4.1
 -4 8 9 18.9 5.5
 3 -8 -9 267.07 20.7
 -3 8 9 251.17 22.5
 -3 8 9 305.07 23.5
 -3 8 9 258.67 22.4
 -3 8 9 276.57 19.2
 -2 8 9 79.89 9.9
 -2 8 9 66.69 9.8
 -2 8 9 68.69 6.2
 1 -8 -9 1033.5 70.29
 -1 8 9 1043.8 72.09
 -1 8 9 987.8 71.79
 -1 8 9 1044.1 68.79
 0 -8 -9 56.79 7.1
 0 -8 -9 50.39 5.9
 0 8 9 52.69 8.6
 0 8 9 51.29 5.2
 -1 -8 -9 109.49 9.5
 -1 -8 -9 105.99 10.3
 1 8 9 102.19 12.1
 1 8 9 111.29 8.8
 -2 -8 -9 57.29 6.6
 2 8 9 58.39 5.6
 -3 -8 -9 -0.6 2.3
 3 8 9 0.6 1.6
 -4 -8 -9 13.1 3.3
 4 8 9 12.5 2.6
 -5 -8 -9 -0.5 2.3
 5 8 9 1.2 1.6
 -6 -8 -9 15.7 3.1
 -11 9 9 2.7 2.3
 -11 9 9 7.6 1.5
 -10 9 9 1.8 3.4
 -10 9 9 2.6 2.8
 -10 9 9 2 1.6
 -9 9 9 53.59 9
 -9 9 9 55.09 5.4
 -8 9 9 51.19 9.2
 -8 9 9 61.49 8.6
 -8 9 9 65.99 6.1
 -7 9 9 3.3 4
 -7 9 9 4.2 4.1
 -7 9 9 2 2.3
 6 -9 -9 9.1 3.4
 -6 9 9 9.9 4.8
 -6 9 9 6.9 4.3
 5 -9 -9 34 5.2
 -5 9 9 25.1 7
 4 -9 -9 28.4 4.9
 -4 9 9 18 5.9
 3 -9 -9 17.1 4.2
 -3 9 9 26.1 6.3
 -3 9 9 24.9 6.8
 -3 9 9 23.6 3.4
 2 -9 -9 20.2 4.3
 -2 9 9 13.5 5.7
 -2 9 9 18.6 5.6
 -2 9 9 16.8 2.9
 1 -9 -9 76.19 9.2
 -1 9 9 90.59 7.8
 -1 9 9 112.29 11.6
 -1 9 9 110.29 12.5
 0 -9 -9 307.17 24.3
 0 9 9 332.27 26.1
 0 9 9 332.77 22.9
 -1 -9 -9 16.9 4.5
 -1 -9 -9 15.1 3.5
 1 9 9 25.4 6.5
 1 9 9 17.2 3.1
 -2 -9 -9 3.8 2.6
 2 9 9 1.7 1.8
 -3 -9 -9 -1.1 2.4
 3 9 9 0.5 1.8
 -4 -9 -9 7.1 2.8
 4 9 9 7.7 2.1
 -5 -9 -9 0 2.2
 -10 10 9 -1.2 2.2
 -10 10 9 0.7 1.3
 -10 10 9 6.9 4.1
 -9 10 9 14.9 5.5
 -9 10 9 19.6 2.9
 -8 10 9 19 5.2
 -8 10 9 8.6 5
 -8 10 9 15.3 3
 -7 10 9 19.2 5.5
 -7 10 9 4.6 4.5
 -7 10 9 9.7 2.7
 -6 10 9 602.14 43
 -6 10 9 551.24 43.9
 5 -10 -9 0.7 3.2
 -5 10 9 8.7 4.8
 -5 10 9 3.2 4.1
 4 -10 -9 88.59 10.2
 -4 10 9 128.19 9.1
 3 -10 -9 3.6 3.1
 -3 10 9 0.6 1.8
 -3 10 9 -1.5 3.3
 2 -10 -9 18.9 4.5
 -2 10 9 21.2 6.7
 -2 10 9 18.5 5.6
 -2 10 9 22.8 3.4
 1 -10 -9 82.09 9.5
 -1 10 9 77.19 9.9
 -1 10 9 72.09 6.8
 -1 10 9 78.69 11
 0 10 9 0.4 1.7
 0 10 9 -0.5 4.7
 1 10 9 11.1 2.5
 1 10 9 15 5.7
 -2 -10 -9 70.29 7.5
 2 10 9 82.09 6.9
 -3 -10 -9 3.8 2.6
 3 10 9 3.6 1.9
 -4 -10 -9 -1 2.3
 4 10 9 2.8 1.6
 -10 11 9 11.5 2.8
 -10 11 9 16.1 1.8
 -9 11 9 212.88 19
 -9 11 9 198.48 16.1
 -9 11 9 220.18 14.9
 -8 11 9 15.9 2.9
 -8 11 9 23.2 6.4
 -8 11 9 18.2 5.1
 -7 11 9 94.49 11.4
 -7 11 9 72.39 6.8
 -7 11 9 60.39 9.1
 -6 11 9 4.8 4.6
 -6 11 9 4.9 4.3
 -5 11 9 9.9 5
 -5 11 9 16.3 5.5
 -4 11 9 61.09 9.3
 -4 11 9 53.59 5.6
 -4 11 9 50.29 8.9
 -3 11 9 -1.1 3.6
 -3 11 9 -0.8 1.8
 -2 11 9 77.29 7.1
 -2 11 9 71.79 10
 -2 11 9 92.59 11.5
 -1 11 9 19.4 6.3
 -1 11 9 18 3.2
 0 11 9 50.59 5.4
 0 11 9 49.7 8.2
 1 11 9 3.2 2
 1 11 9 9.1 4.8
 2 11 9 0.5 1.8
 3 11 9 1 1.7
 -9 12 9 0.1 1.1
 -9 12 9 0.9 3.2
 -9 12 9 0.6 1.9
 -8 12 9 83.39 6.4
 -8 12 9 82.59 9
 -8 12 9 73.09 9.9
 -7 12 9 65.79 5.6
 -7 12 9 73.69 8.8
 -7 12 9 46.4 8.5
 -6 12 9 89.19 11.2
 -5 12 9 9 5
 -5 12 9 4 4.2
 -4 12 9 91.49 8.2
 -4 12 9 115.09 11.9
 -3 12 9 25.7 5.9
 -3 12 9 16.7 3.2
 -2 12 9 24.7 6
 -2 12 9 29.3 3.9
 -1 12 9 67.49 6.4
 -1 12 9 74.39 9.9
 0 12 9 8.5 2.3
 0 12 9 7.6 4.7
 1 12 9 5.7 2.1
 2 12 9 126.49 9.4
 -8 13 9 5.4 2.9
 -8 13 9 2 1.2
 -7 13 9 2.5 1.4
 -7 13 9 -0.1 4.8
 -7 13 9 0 2.9
 -6 13 9 36.1 6.4
 -6 13 9 27.2 3.3
 -5 13 9 14.6 4.8
 -4 13 9 4.8 3.8
 -4 13 9 5.7 2
 -3 13 9 46 4.7
 -2 13 9 26.2 3.5
 -1 13 9 4.1 2
 0 13 9 6.1 1.9
 1 13 9 8.9 1.9
 -7 14 9 3.7 2.9
 -6 14 9 37.3 3.2
 -6 14 9 28.5 5.1
 -5 14 9 0.4 2.8
 -4 14 9 12.5 2.3
 -4 14 9 11.6 3.6
 -3 14 9 62.89 5.4
 -3 14 9 60.39 7.1
 -2 14 9 -0.9 1.4
 -1 14 9 2.8 1.5
 -2 15 -10 2.5 2.6
 -2 15 -10 -0.1 2.7
 -3 15 -10 0.7 2.5
 -3 15 -10 3.3 1.9
 -4 15 -10 9 2.3
 -5 15 -10 4.5 2
 -5 15 -10 3.6 3.2
 -6 15 -10 7.2 2.1
 -6 15 -10 10.3 3.6
 -7 15 -10 7.8 2
 -7 15 -10 8.3 2.9
 1 14 -10 9.6 3.2
 0 14 -10 -0.8 3
 0 14 -10 1 2.7
 -1 14 -10 20.2 4.1
 -2 14 -10 2.8 2
 -2 14 -10 2.1 3.1
 -3 14 -10 17.3 3.1
 -3 14 -10 16.4 4.8
 -3 14 -10 21.5 4.6
 -4 14 -10 3.1 3.6
 -4 14 -10 2 2.2
 -5 14 -10 25.7 5.5
 -5 14 -10 23.4 3.7
 -5 14 -10 18.6 3.5
 -6 14 -10 10.7 2.6
 -6 14 -10 8.5 2.6
 -6 14 -10 14 4.3
 -7 14 -10 2 3.1
 -7 14 -10 3.5 2
 -7 14 -10 2.2 2.1
 -8 14 -10 14.1 2.6
 -8 14 -10 18.9 2.8
 2 13 -10 16.4 3.5
 2 13 -10 12.2 3.1
 1 13 -10 -1.2 2.4
 1 13 -10 -0.6 2.9
 0 13 -10 5.1 2.4
 0 13 -10 9 3.5
 0 13 -10 10.3 3.7
 -1 13 -10 70.89 8
 -1 13 -10 58.29 8.1
 -1 13 -10 47.4 5.8
 -2 13 -10 28.9 3.9
 -2 13 -10 33.4 6.3
 -2 13 -10 16.1 4.7
 -3 13 -10 9.6 2.9
 -3 13 -10 10.9 4.2
 -3 13 -10 14.5 5
 -4 13 -10 33.2 5.7
 -4 13 -10 23.7 4.2
 -4 13 -10 25.3 4
 -4 13 -10 24.5 6.3
 -5 13 -10 2.5 2.6
 -5 13 -10 1.1 4.1
 -5 13 -10 5 2.5
 -6 13 -10 11.3 3.1
 -6 13 -10 14.4 5.2
 -6 13 -10 18.3 3.6
 -7 13 -10 3.2 3.6
 -7 13 -10 -0.1 2.1
 -7 13 -10 -0.4 2.3
 -8 13 -10 60.09 5.9
 -8 13 -10 64.19 6.1
 -9 13 -10 4.7 2.1
 4 12 -10 0.3 2.1
 3 12 -10 32 4.6
 3 12 -10 43.1 5.5
 2 12 -10 32.5 4.6
 2 12 -10 27.8 4.6
 2 12 -10 35.4 5.3
 1 12 -10 3.1 3.2
 1 12 -10 3.1 2.8
 1 12 -10 5.8 2.6
 0 12 -10 4.6 3.2
 0 12 -10 10.2 3.8
 0 12 -10 6.4 2.7
 -1 12 -10 29.6 4.5
 -1 12 -10 32.8 5.4
 -1 12 -10 25.5 5.3
 -1 12 -10 43.7 7
 -2 12 -10 19 5.6
 -2 12 -10 11.1 3
 -2 12 -10 4.5 3.9
 -3 12 -10 4.6 2.6
 -3 12 -10 12.2 3
 -3 12 -10 5.8 4.6
 -3 12 -10 7.7 4.3
 -4 12 -10 2.4 3.7
 -4 12 -10 2.4 2.4
 -4 12 -10 3.3 2.6
 -4 12 -10 9 5
 -5 12 -10 14.5 5.7
 -5 12 -10 13 2.7
 -5 12 -10 9 2.9
 -5 12 -10 9.8 3.2
 -6 12 -10 6.8 4.9
 -6 12 -10 2.9 2.7
 -6 12 -10 5 2.7
 -7 12 -10 38.3 5.1
 -7 12 -10 38.3 4.9
 -7 12 -10 31.9 6.8
 -8 12 -10 25.4 6
 -8 12 -10 24.9 4
 -8 12 -10 35.3 4.5
 -9 12 -10 12.3 2.8
 -10 12 -10 74.59 6.5
 5 11 -10 0.8 2.1
 4 11 -10 24.9 4.2
 4 11 -10 20.5 4.1
 3 11 -10 0.7 2.4
 3 11 -10 0.7 2.7
 3 11 -10 -0.7 3
 2 11 -10 12.8 3.4
 2 11 -10 18.1 4.4
 2 11 -10 5.8 3.3
 1 11 -10 58.59 7.1
 1 11 -10 54.49 6.5
 1 11 -10 56.69 7.4
 0 11 -10 70.29 8.2
 0 11 -10 73.29 8.3
 0 11 -10 67.39 7.2
 -1 11 -10 89.19 8.9
 -1 11 -10 63.29 9.2
 -1 11 -10 70.39 7.2
 -1 11 -10 69.59 6.9
 -1 11 -10 66.19 8
 -2 11 -10 52.39 5.8
 -2 11 -10 37.6 5.2
 -2 11 -10 49.6 8.5
 -2 11 -10 41.9 5.6
 -2 11 -10 68.69 8.4
 -3 11 -10 3.4 2.5
 -3 11 -10 7.1 4.9
 -3 11 -10 4.9 3.8
 -3 11 -10 7.1 2.8
 -4 11 -10 17.4 6.9
 -4 11 -10 12.5 3.2
 -4 11 -10 7.6 4.2
 -4 11 -10 14.4 2.7
 -4 11 -10 9.2 5.5
 -4 11 -10 11 3.2
 -5 11 -10 193.48 14.5
 -5 11 -10 207.08 19
 -5 11 -10 172.98 15.3
 -5 11 -10 207.78 20.5
 -5 11 -10 202.68 15.4
 -6 11 -10 54.89 10.6
 -6 11 -10 78.29 11
 -6 11 -10 72.99 6.6
 -6 11 -10 82.39 7.9
 -6 11 -10 82.69 7.7
 -7 11 -10 29.2 4.6
 -7 11 -10 37.4 5
 -7 11 -10 20 6.1
 -8 11 -10 12.4 3.4
 -8 11 -10 9.5 4.8
 -8 11 -10 15.5 3.3
 -9 11 -10 70.79 7
 -10 11 -10 1.9 2
 -10 11 -10 0.5 2
 6 10 -10 0.7 2.1
 5 10 -10 10 3.2
 -5 -10 10 6.7 3.7
 4 10 -10 4.4 3.1
 4 10 -10 4.2 2.8
 3 10 -10 247.18 18
 3 10 -10 202.88 17.2
 3 10 -10 232.78 17.4
 2 10 -10 -0.2 2.7
 2 10 -10 0.5 2.6
 2 10 -10 0.6 2.4
 1 10 -10 5.4 2.7
 1 10 -10 3.2 2.9
 1 10 -10 0 2.6
 0 10 -10 52.59 6.6
 0 10 -10 44.6 6.5
 0 10 -10 51.79 6.1
 -1 10 -10 39.5 5.2
 -1 10 -10 52.19 7
 -1 10 -10 49.9 6
 -1 10 -10 50.19 8.4
 -2 10 -10 29.7 6.8
 -2 10 -10 18.2 6.9
 -2 10 -10 19.4 4.9
 -2 10 -10 20.9 3.6
 -2 10 -10 20.3 3.8
 -2 10 -10 21.4 3.7
 -3 10 -10 7.3 2.1
 -3 10 -10 17.3 6.6
 -3 10 -10 0.5 4
 -3 10 -10 6.4 3.7
 -3 10 -10 -2.7 2.1
 -3 10 -10 -0.8 2.2
 -4 10 -10 166.18 13.4
 -4 10 -10 157.88 12.5
 -4 10 -10 168.88 18
 -4 10 -10 182.18 17.1
 -4 10 -10 159.58 14.8
 -4 10 -10 182.38 13.5
 -5 10 -10 106.59 14.1
 -5 10 -10 138.49 11.4
 -5 10 -10 166.18 16.7
 -5 10 -10 133.09 11.5
 -5 10 -10 131.99 10.5
 -6 10 -10 -1.3 2.3
 -6 10 -10 -1.5 3.9
 -6 10 -10 3.3 4.4
 -6 10 -10 0.4 2.8
 -6 10 -10 0.9 1.9
 -7 10 -10 12.1 5.2
 -7 10 -10 17.7 4.1
 -7 10 -10 15.1 3.6
 -7 10 -10 18.2 3.4
 -7 10 -10 30.4 7.5
 -8 10 -10 12 3.5
 -8 10 -10 14.3 3.6
 -8 10 -10 17.3 3.5
 -9 10 -10 15.2 3.5
 -9 10 -10 16.7 3.7
 -10 10 -10 96.69 8.3
 -10 10 -10 91.89 8.2
 -11 10 -10 6 2.2
 6 9 -10 6.3 2.6
 -6 -9 10 2.5 3.5
 5 9 -10 0.1 2.6
 4 9 -10 10.1 3.4
 4 9 -10 8.8 3.8
 4 9 -10 10.9 3.3
 3 9 -10 14.4 4.1
 3 9 -10 12.8 3.5
 3 9 -10 16.3 3.8
 2 9 -10 20.3 4.4
 2 9 -10 21.9 4.5
 2 9 -10 24 4.2
 -2 -9 10 22.3 4.6
 1 9 -10 1.8 2.7
 1 9 -10 3.4 2.8
 1 9 -10 5.7 2.6
 0 9 -10 193.38 15.8
 0 9 -10 202.98 15.6
 0 9 -10 169.48 16
 0 9 -10 247.58 18.1
 -1 9 -10 -0.2 4.1
 -1 9 -10 7.8 4.9
 -1 9 -10 2.9 2.9
 -1 9 -10 2.5 2.3
 -1 9 -10 2.4 2.3
 -1 9 -10 1.9 2.3
 -2 9 -10 136.69 10.6
 -2 9 -10 121.89 14.6
 -2 9 -10 123.89 9.9
 -2 9 -10 128.89 13.6
 -2 9 -10 137.69 10.6
 -2 9 -10 138.89 10.7
 -2 9 -10 118.99 11.8
 -3 9 -10 14.6 5.3
 -3 9 -10 18.3 3.2
 -3 9 -10 20.1 3
 -3 9 -10 19.2 3.5
 -3 9 -10 18.7 3.5
 -3 9 -10 21.5 4.6
 -3 9 -10 20.1 6.4
 -4 9 -10 14.1 3.4
 -4 9 -10 25.4 4.9
 -4 9 -10 15.2 5.6
 -4 9 -10 21.4 3.1
 -4 9 -10 22.9 4
 -5 9 -10 7 3
 -5 9 -10 1.1 3.8
 -5 9 -10 9.4 3
 -5 9 -10 2.6 1.9
 -5 9 -10 10 5
 -6 9 -10 263.17 18.6
 -6 9 -10 197.58 20.3
 -6 9 -10 267.77 17.5
 -6 9 -10 226.28 17.8
 -7 9 -10 80.69 8
 -7 9 -10 63.59 9.6
 -7 9 -10 72.19 7.4
 -7 9 -10 87.09 8.2
 -8 9 -10 164.48 13.9
 -8 9 -10 175.08 14.2
 -9 9 -10 352.96 26.9
 -9 9 -10 399.26 27.5
 -10 9 -10 22.6 4.1
 -10 9 -10 16.6 3.4
 -11 9 -10 5.2 2.4
 7 8 -10 38.2 4.9
 6 8 -10 -2.8 2.5
 -6 -8 10 3.2 3.8
 5 8 -10 1.7 2.6
 5 8 -10 -1.1 3
 4 8 -10 47.1 6.1
 4 8 -10 56.79 7.4
 3 8 -10 71.69 8
 3 8 -10 105.59 8.3
 3 8 -10 84.79 8.7
 -3 -8 10 61.09 8.3
 2 8 -10 51.29 6.2
 2 8 -10 38.2 5.6
 2 8 -10 38.5 6.1
 -2 -8 10 65.89 7.1
 1 8 -10 46.4 6.3
 1 8 -10 42.3 6.1
 1 8 -10 50.49 6.1
 -1 -8 10 52.79 6.3
 0 8 -10 68.89 7.9
 0 8 -10 72.69 7.5
 0 8 -10 82.29 10.8
 0 8 -10 70.09 6.9
 0 8 -10 66.29 9.1
 -1 8 -10 8.7 2.7
 -1 8 -10 10.4 4.6
 -1 8 -10 10.4 3.6
 -1 8 -10 14.7 2.9
 -1 8 -10 12.9 5.1
 -1 8 -10 16.6 3
 -2 8 -10 143.29 10.8
 -2 8 -10 130.99 10.6
 -2 8 -10 152.68 13.7
 -2 8 -10 114.29 10.1
 -2 8 -10 123.59 11.8
 -2 8 -10 149.19 10.7
 -3 8 -10 23.2 5.8
 -3 8 -10 19.9 4.3
 -3 8 -10 20.4 3.1
 -3 8 -10 11.7 5.2
 -3 8 -10 22.3 3.6
 -3 8 -10 20.4 3.3
 -3 8 -10 20.6 3.4
 -4 8 -10 52.29 7
 -4 8 -10 54.19 5.6
 -4 8 -10 68.49 6.8
 -4 8 -10 78.79 9.6
 -4 8 -10 76.59 6.5
 -5 8 -10 322.07 23.3
 -5 8 -10 350.76 22.9
 -5 8 -10 334.27 23.8
 -5 8 -10 290.17 25.6
 -6 8 -10 149.49 12.5
 -6 8 -10 165.48 13.3
 -6 8 -10 191.58 12.4
 -6 8 -10 162.68 13.2
 -6 8 -10 133.99 14.8
 -7 8 -10 33.3 4.3
 -7 8 -10 26 4.8
 -7 8 -10 28.8 7.4
 -7 8 -10 22.4 3.9
 -7 8 -10 25.7 4.6
 -8 8 -10 111.99 10.2
 -8 8 -10 93.89 9.5
 -9 8 -10 69.79 7.9
 -9 8 -10 59.69 7
 -10 8 -10 87.79 8.7
 -11 8 -10 0.5 2.2
 8 7 -10 7.8 3
 7 7 -10 19.7 3.9
 -7 -7 10 12.8 4.9
 6 7 -10 23.1 4.5
 -6 -7 10 8.9 4.9
 5 7 -10 214.98 16.3
 5 7 -10 204.98 17
 4 7 -10 2.2 2.9
 4 7 -10 1.2 2.2
 -4 -7 10 -1.7 3.2
 3 7 -10 310.07 22.7
 3 7 -10 308.17 23.3
 -3 -7 10 317.17 23.3
 2 7 -10 14.7 3.5
 2 7 -10 16 3.8
 2 7 -10 13.9 3.1
 -2 -7 10 14.4 3.6
 1 7 -10 265.47 22
 1 7 -10 307.57 22.4
 1 7 -10 294.77 21.9
 -1 -7 10 347.77 21.8
 0 7 -10 395.96 30
 0 7 -10 445.26 33.2
 -1 7 -10 60.49 6.5
 -1 7 -10 49.3 8
 -2 7 -10 448.56 30.3
 -2 7 -10 396.16 32.6
 -3 7 -10 105.49 8.2
 -3 7 -10 87.69 11.2
 -3 7 -10 103.59 9.2
 -3 7 -10 115.89 9.3
 -4 7 -10 76.29 7.2
 -4 7 -10 90.39 7.6
 -4 7 -10 103.29 10.4
 -4 7 -10 88.09 8.1
 -5 7 -10 265.07 19.1
 -5 7 -10 302.27 19
 -5 7 -10 263.67 19.6
 -5 7 -10 232.18 20.9
 -5 7 -10 256.27 19.5
 -6 7 -10 28.8 6.3
 -6 7 -10 31.9 5.2
 -6 7 -10 41.8 5.1
 -6 7 -10 52.59 4.1
 -6 7 -10 58.69 8.8
 -6 7 -10 43.7 4.7
 -6 7 -10 30.9 5.3
 -7 7 -10 21.4 4.1
 -7 7 -10 19.9 4.3
 -7 7 -10 22.3 3.4
 -8 7 -10 75.49 8.2
 -8 7 -10 65.99 7.5
 -8 7 -10 73.09 6.8
 -9 7 -10 553.24 39.4
 -10 7 -10 5.4 3.1
 -11 7 -10 1.4 2.2
 8 6 -10 102.39 8.9
 7 6 -10 0.7 2.7
 -7 -6 10 1.7 3.9
 6 6 -10 2.1 3
 6 6 -10 5.2 2.9
 -6 -6 10 -0.4 4.1
 5 6 -10 208.18 16.4
 5 6 -10 213.58 15.8
 -5 -6 10 180.18 16.6
 4 6 -10 45.9 6.2
 4 6 -10 49.4 5.7
 -4 -6 10 37.5 5.9
 3 6 -10 67.29 7.3
 3 6 -10 70.39 7
 -3 -6 10 77.39 7.3
 2 6 -10 59.79 6.1
 2 6 -10 65.19 6.6
 -2 -6 10 54.29 6
 -1 -6 10 34.2 4.1
 0 6 -10 5.3 3.5
 -1 6 -10 31.2 6.3
 -2 6 -10 276.97 22.7
 -3 6 -10 21.6 5.8
 -4 6 -10 9.8 2.3
 -4 6 -10 8.7 2.4
 -4 6 -10 11.9 4.7
 -5 6 -10 5.8 5
 -5 6 -10 6.1 2.3
 -5 6 -10 11.8 2.3
 -5 6 -10 9.4 3.1
 -5 6 -10 9.6 2.9
 -6 6 -10 141.99 9.6
 -6 6 -10 130.59 10.1
 -6 6 -10 114.29 10
 -6 6 -10 107.19 10.5
 -7 6 -10 8.3 2.4
 -7 6 -10 11.1 3.2
 -7 6 -10 8.5 3.2
 -7 6 -10 16.2 5.9
 -8 6 -10 162.58 13.9
 -9 6 -10 97.99 9.8
 -10 6 -10 12.5 3.7
 -11 6 -10 12.1 3.1
 8 5 -10 0.8 2.5
 -8 -5 10 0.8 3.9
 7 5 -10 12.6 3.7
 -7 -5 10 3.4 4.4
 6 5 -10 66.79 7
 6 5 -10 64.99 7.7
 5 5 -10 163.68 13.6
 5 5 -10 172.68 13
 -5 -5 10 148.59 13.7
 4 5 -10 12.3 2.9
 4 5 -10 11.4 3.1
 -4 -5 10 6.6 3.1
 3 5 -10 219.68 17.6
 3 5 -10 226.28 17.4
 -3 -5 10 266.07 17.8
 -2 -5 10 132.49 10.4
 -1 -5 10 28.7 3.5
 0 -5 10 6.1 1.7
 -3 5 -10 156.98 11.7
 -4 5 -10 870.31 58.09
 -4 5 -10 880.21 59.09
 -5 5 -10 9.1 1.7
 -5 5 -10 4.4 2
 -5 5 -10 2.2 1.9
 -6 5 -10 305.77 22.6
 -6 5 -10 284.47 22
 -6 5 -10 279.57 21.5
 -6 5 -10 346.77 21.5
 -7 5 -10 4.1 1.9
 -7 5 -10 2.2 1.8
 -7 5 -10 0.9 2.4
 -8 5 -10 4.2 3.1
 -9 5 -10 29.3 5.2
 -10 5 -10 78.49 8
 -11 5 -10 3.6 2.4
 9 4 -10 12.2 3.4
 8 4 -10 226.88 15.7
 -8 -4 10 159.18 18.3
 -7 -4 10 35.2 8.1
 6 4 -10 124.29 10.3
 6 4 -10 125.09 10.3
 -6 -4 10 99.69 10.6
 -6 -4 10 91.09 13.2
 5 4 -10 71.49 6.8
 5 4 -10 70.39 7.4
 -5 -4 10 54.59 7.2
 4 4 -10 105.59 9.4
 4 4 -10 95.59 8.8
 -4 -4 10 115.49 9.4
 -3 -4 10 31.7 4.2
 -2 -4 10 0.1 1.4
 -1 -4 10 345.27 23.8
 0 -4 10 612.64 41.1
 -1 4 -10 766.02 50.99
 -2 4 -10 67.09 4.8
 -2 4 -10 56.29 5.2
 -3 4 -10 1137.59 78.29
 -3 4 -10 1232.78 78.99
 -4 4 -10 74.59 5.7
 -4 4 -10 69.29 6.6
 -5 4 -10 141.59 10.4
 -6 4 -10 205.38 14.2
 -6 4 -10 181.08 14
 -6 4 -10 190.18 15.1
 -7 4 -10 378.36 27
 -7 4 -10 347.27 26
 -7 4 -10 386.26 25.7
 -8 4 -10 99.29 9.6
 -9 4 -10 4.7 3
 -10 4 -10 166.78 13.4
 -11 4 -10 0 1.9
 9 3 -10 6.1 2.8
 -9 -3 10 3.8 4
 8 3 -10 44.7 6.2
 -8 -3 10 44.5 9.2
 7 3 -10 30.9 4.9
 -7 -3 10 17.6 6.3
 6 3 -10 3.6 3
 -6 -3 10 7.6 3.2
 -6 -3 10 1.4 4.1
 -5 -3 10 716.33 49.4
 -4 -3 10 79.09 7.4
 -3 -3 10 115.49 9.3
 -2 -3 10 204.78 14.9
 -1 -3 10 271.67 18.9
 0 3 -10 47.8 4
 0 -3 10 36.8 3.9
 -1 3 -10 550.94 35.8
 1 -3 10 516.45 35.8
 -2 3 -10 394.66 26.1
 -2 3 -10 374.36 26.2
 -3 3 -10 10.5 2.4
 -3 3 -10 12.2 1.9
 -4 3 -10 646.24 42.6
 -4 3 -10 618.94 43.2
 -5 3 -10 99.29 7.8
 -5 3 -10 117.99 10.5
 5 -3 10 92.69 8.2
 -6 3 -10 611.34 43.4
 -6 3 -10 628.84 42.7
 6 -3 10 638.44 43
 -7 3 -10 109.19 9.6
 -7 3 -10 103.59 8.9
 7 -3 10 97.39 9.2
 -8 3 -10 158.48 13.2
 8 -3 10 161.28 13.2
 -9 3 -10 16 3.7
 -10 3 -10 19.8 3.7
 -11 3 -10 24.2 3.5
 -10 -2 10 42.3 5.2
 9 2 -10 0.8 2.5
 -9 -2 10 -0.6 3.6
 8 2 -10 56.19 6.5
 -8 -2 10 45.7 9.5
 7 2 -10 8 3.7
 -7 -2 10 12.1 3.9
 -7 -2 10 15.8 6
 -6 -2 10 170.18 16.3
 -6 -2 10 132.99 12.5
 -5 -2 10 16.5 3.4
 -5 -2 10 8.5 4.5
 -4 -2 10 3.1 2.1
 -3 -2 10 81.69 7.2
 -2 -2 10 4.5 1.8
 -1 -2 10 2.1 1.4
 0 2 -10 253.77 17.5
 0 -2 10 249.88 17.5
 -1 2 -10 652.63 42.4
 1 -2 10 608.94 42.3
 -2 2 -10 86.99 7.1
 -2 2 -10 93.89 7.1
 2 -2 10 92.19 7
 -3 2 -10 7.2 1.7
 -3 2 -10 5.6 2
 3 -2 10 6.3 1.9
 -4 2 -10 187.98 13
 4 -2 10 166.88 13.2
 -5 2 -10 105.59 8.5
 5 -2 10 107.09 8.8
 -6 2 -10 74.79 6.3
 -6 2 -10 67.79 7.2
 -6 2 -10 83.79 7
 6 -2 10 72.19 7.2
 -7 2 -10 73.59 7.6
 -7 2 -10 71.69 6.4
 7 -2 10 80.89 7.7
 -8 2 -10 0.5 2.3
 -9 2 -10 63.79 7
 -10 2 -10 5.7 2.5
 -10 -1 10 30.6 3.7
 -10 -1 10 17.2 5.1
 9 1 -10 6.7 3
 -9 -1 10 8.7 2.7
 -9 -1 10 1.7 3.5
 -8 -1 10 22.1 6.6
 -7 -1 10 70.79 10.7
 -7 -1 10 75.99 8.2
 -6 -1 10 59.19 7.2
 -6 -1 10 79.79 10.3
 5 1 -10 48.5 5.1
 -5 -1 10 50.09 5.9
 -5 -1 10 60.69 8.3
 -4 -1 10 36.5 6.4
 -3 -1 10 131.79 10.3
 -2 -1 10 121.79 9.4
 1 1 -10 98.49 7.5
 -1 -1 10 89.09 7.4
 0 1 -10 53.69 4.6
 0 -1 10 49.2 4.6
 -1 1 -10 1118.49 75.19
 1 -1 10 1140.49 75.19
 -2 1 -10 296.37 20.6
 2 -1 10 290.37 20.5
 -3 1 -10 216.98 15.8
 3 -1 10 225.28 16.1
 -4 1 -10 191.48 14.2
 4 -1 10 199.58 14.7
 -5 1 -10 6.4 2.1
 -5 1 -10 5 1.9
 -5 1 -10 6 2.4
 5 -1 10 5.2 2.4
 -6 1 -10 567.54 39.1
 -6 1 -10 599.04 40.1
 -6 1 -10 549.05 40
 6 -1 10 592.44 40.3
 -7 1 -10 272.77 19.2
 -7 1 -10 260.67 20
 7 -1 10 275.97 20.6
 -8 1 -10 50.89 5.2
 -8 1 -10 50.79 6.1
 -9 1 -10 8.1 3
 -9 1 -10 11.6 2.9
 -10 1 -10 30.4 4.7
 -11 0 10 4.9 2.3
 -10 0 10 28.6 6.4
 -10 0 10 41.4 4.4
 9 0 -10 80.49 8.3
 -9 0 10 93.19 7.6
 -9 0 10 89.89 11.5
 -8 0 10 111.69 13.5
 -8 0 10 116.19 9.4
 -7 0 10 224.68 20.9
 -7 0 10 220.88 17.6
 6 0 -10 147.19 11
 -6 0 10 139.19 14.6
 -6 0 10 137.59 11.8
 5 0 -10 8.2 2.1
 -5 0 10 5.1 2.3
 -5 0 10 6 3.7
 -4 0 10 527.55 38.1
 -4 0 10 505.45 35.7
 -3 0 10 7.5 2.2
 -2 0 10 15.1 2.6
 1 0 -10 157.58 11.9
 -1 0 10 167.98 12
 0 0 -10 482.25 34.9
 0 0 10 548.85 35
 -1 0 -10 584.84 41
 1 0 10 625.74 41
 -2 0 -10 403.56 27.5
 2 0 10 386.46 27.4
 -3 0 -10 34.5 4
 3 0 10 34.2 4.4
 -4 0 -10 9.9 2.4
 4 0 10 9.3 2.8
 -5 0 -10 24.7 3.9
 -5 0 -10 27.2 4.1
 -5 0 -10 20.2 3.1
 5 0 10 25.8 4.2
 -6 0 -10 42.4 4.8
 -6 0 -10 43.5 5.4
 6 0 10 47.8 6.3
 -7 0 -10 245.98 17.9
 -7 0 -10 233.28 17
 7 0 10 217.58 18.3
 -8 0 -10 4.2 2.1
 -8 0 -10 1.1 2.5
 -9 0 -10 7.3 2.4
 -9 0 -10 7.4 3
 -11 1 10 4.5 1.8
 -10 1 10 92.49 11.1
 -10 1 10 90.19 7.5
 -9 1 10 65.39 9.7
 -9 1 10 64.39 6.3
 -8 1 10 37.3 8.3
 -8 1 10 27.2 4.1
 -7 1 10 123.59 13.9
 -7 1 10 112.39 11
 -7 1 10 139.89 10.1
 6 -1 -10 98.99 8.7
 6 -1 -10 101.59 8.1
 -6 1 10 88.59 11.2
 -6 1 10 92.69 8.8
 5 -1 -10 80.09 7.2
 -5 1 10 79.09 9.7
 4 -1 -10 541.05 36.7
 -4 1 10 526.45 39.2
 -4 1 10 537.05 37
 3 -1 -10 19.1 3
 -3 1 10 25.2 3.5
 2 -1 -10 577.84 39.2
 2 -1 -10 554.54 38.7
 -2 1 10 583.34 39
 1 -1 -10 143.69 11.3
 -1 1 10 159.08 11.4
 0 -1 -10 45.1 4.8
 0 1 10 57.89 5.1
 -1 -1 -10 959.8 65.29
 1 1 10 985.2 65.29
 -2 -1 -10 483.65 33.9
 2 1 10 498.95 34
 -3 -1 -10 461.65 31.8
 3 1 10 447.56 31.8
 -4 -1 -10 12 2.6
 4 1 10 16.9 3.5
 -5 -1 -10 275.97 19.7
 -5 -1 -10 277.17 20.3
 5 1 10 274.77 20.7
 -6 -1 -10 179.68 13
 -6 -1 -10 163.48 13.5
 6 1 10 166.68 14.1
 -7 -1 -10 146.89 12.1
 -7 -1 -10 149.39 11.4
 7 1 10 128.89 12.4
 -8 -1 -10 11.6 2.8
 -9 -1 -10 -0.9 2.2
 -11 2 10 39.5 4.2
 -10 2 10 75.09 6.5
 -10 2 10 71.49 9.6
 -9 2 10 21.7 6.2
 -9 2 10 26.3 3.6
 -8 2 10 72.59 6.5
 -8 2 10 60.79 9.7
 7 -2 -10 70.99 7.6
 7 -2 -10 78.39 7
 -7 2 10 82.39 8.2
 -7 2 10 74.79 10.4
 -7 2 10 70.29 6.7
 6 -2 -10 99.89 8.9
 6 -2 -10 101.29 8.5
 -6 2 10 102.39 8.3
 -6 2 10 100.39 9.2
 -6 2 10 101.49 11.6
 5 -2 -10 617.94 42.9
 -5 2 10 611.34 43.1
 -5 2 10 642.64 45.8
 4 -2 -10 1 1.7
 -4 2 10 3 2.8
 -4 2 10 3.5 2.1
 3 -2 -10 11.3 2.5
 -3 2 10 12.4 2.7
 2 -2 -10 190.48 14.1
 -2 2 10 198.58 14.4
 1 -2 -10 12.2 2.5
 1 -2 -10 11 2.1
 -1 2 10 12.6 2.6
 0 -2 -10 667.53 45.4
 0 2 10 663.93 45.3
 -1 -2 -10 78.39 7.1
 1 2 10 88.99 7.4
 2 2 10 877.91 59.49
 3 2 10 -1.8 2
 -4 -2 -10 6.6 2.3
 -4 -2 -10 13 3.2
 4 2 10 8.3 3
 -5 -2 -10 17 3.8
 -5 -2 -10 10.7 2.7
 5 2 10 14.4 3.7
 -6 -2 -10 10.8 3.5
 -6 -2 -10 9.3 2.8
 6 2 10 11.8 3.8
 -7 -2 -10 24.3 3.8
 -8 -2 -10 22.5 3.7
 -9 -2 -10 21.6 3.2
 -11 3 10 2.4 1.8
 -10 3 10 0.4 1.8
 -10 3 10 0.1 3.3
 -9 3 10 39.5 4.7
 -9 3 10 44.3 8.4
 8 -3 -10 293.77 22.5
 -8 3 10 317.67 26.1
 -8 3 10 298.77 21.6
 7 -3 -10 734.13 50.69
 7 -3 -10 766.02 51.59
 -7 3 10 733.23 54.89
 -7 3 10 745.23 51.79
 -7 3 10 757.02 50.59
 6 -3 -10 18.2 3.3
 6 -3 -10 14.7 3.4
 -6 3 10 14.9 2.5
 -6 3 10 13.9 3.7
 -6 3 10 21.7 5.9
 5 -3 -10 76.19 7.1
 -5 3 10 71.89 7.3
 -5 3 10 70.29 8.9
 4 -3 -10 3.9 2
 -4 3 10 3.9 3
 -4 3 10 5.8 2.4
 3 -3 -10 339.17 24.5
 -3 3 10 357.96 24.8
 2 -3 -10 73.89 6.6
 -2 3 10 79.79 7.1
 1 -3 -10 137.49 10.8
 -1 3 10 148.59 11.3
 0 -3 -10 307.57 21.6
 0 3 10 308.67 22.1
 1 3 10 15.4 3.3
 2 3 10 169.68 13.3
 -3 -3 -10 150.38 11.9
 3 3 10 158.98 12.6
 -4 -3 -10 179.18 13
 -4 -3 -10 171.48 13.6
 4 3 10 156.88 13.7
 -5 -3 -10 5.4 2.4
 5 3 10 7.1 3.5
 -6 -3 -10 3.3 2.2
 6 3 10 3.6 3.3
 -7 -3 -10 245.88 18
 -8 -3 -10 5.6 2.4
 -9 -3 -10 9.3 2.3
 -11 4 10 1 3.1
 -11 4 10 7.2 2
 -10 4 10 31.8 4
 -10 4 10 32.3 6.9
 -9 4 10 369.76 25.6
 -9 4 10 357.36 29.7
 8 -4 -10 54.79 6.5
 8 -4 -10 68.09 7.5
 -8 4 10 63.59 6.3
 -8 4 10 82.39 10.7
 7 -4 -10 93.79 8.5
 7 -4 -10 79.99 7.9
 -7 4 10 79.99 7.6
 -7 4 10 98.69 11.3
 6 -4 -10 6.1 2.5
 6 -4 -10 6.7 2.3
 -6 4 10 1.4 2.5
 -6 4 10 17.6 5.2
 -6 4 10 5.5 2.1
 5 -4 -10 361.36 25.6
 5 -4 -10 326.47 25.4
 -5 4 10 355.96 25.9
 -5 4 10 376.96 28.1
 4 -4 -10 10.2 2.7
 -4 4 10 11 3.9
 -4 4 10 12 3
 3 -4 -10 92.79 8.2
 -3 4 10 101.79 8.7
 2 -4 -10 68.19 6.5
 -2 4 10 80.29 7.2
 1 -4 -10 874.71 58.39
 -1 4 10 852.31 58.69
 0 -4 -10 64.99 6.6
 0 4 10 86.69 7.4
 -1 -4 -10 51.89 7.3
 1 4 10 61.59 6.4
 -2 -4 -10 59.69 6.2
 2 4 10 53.59 6.2
 -3 -4 -10 656.93 45.5
 -3 -4 -10 683.03 46.3
 3 4 10 660.43 46.2
 -4 -4 -10 63.69 6.3
 4 4 10 55.59 7
 -5 -4 -10 133.69 10
 5 4 10 102.49 10.8
 -6 -4 -10 157.68 12.5
 -7 -4 -10 13.6 3.2
 -8 -4 -10 2.9 2.2
 -11 5 10 37.7 6.9
 -11 5 10 30.2 3.7
 -10 5 10 81.19 10
 -10 5 10 75.09 6.7
 -10 5 10 77.39 7.9
 -9 5 10 11.5 5
 -9 5 10 21 3.1
 8 -5 -10 25.3 4.6
 -8 5 10 20.1 6.2
 -8 5 10 20.8 3.2
 7 -5 -10 42.5 5.6
 -7 5 10 50.09 8.4
 -7 5 10 33.2 4.3
 6 -5 -10 9.4 2.8
 6 -5 -10 16 3.4
 -6 5 10 28.8 6.3
 -6 5 10 10.1 4.5
 -6 5 10 11.4 2.8
 5 -5 -10 10.8 3
 5 -5 -10 25.3 4.2
 -5 5 10 28.6 6.2
 -5 5 10 20.2 4.3
 4 -5 -10 231.58 17
 -4 5 10 233.18 17.4
 -4 5 10 215.68 18.8
 3 -5 -10 108.79 9.1
 -3 5 10 110.19 9.5
 -3 5 10 102.39 10.5
 2 -5 -10 61.19 6.3
 -2 5 10 68.79 6.8
 1 -5 -10 0.8 2
 -1 5 10 2.1 2.1
 0 -5 -10 15.3 3.2
 0 5 10 9.1 2.9
 -1 -5 -10 77.59 7.7
 -1 -5 -10 70.49 7.2
 1 5 10 78.69 7.6
 -2 -5 -10 122.89 10.2
 2 5 10 125.09 10.9
 -3 -5 -10 70.59 6.7
 3 5 10 59.39 7.2
 -4 -5 -10 10.4 3
 4 5 10 7.5 3.6
 -5 -5 -10 82.59 7.8
 -6 -5 -10 184.38 13.7
 6 5 10 171.78 13.1
 -7 -5 -10 5.2 2.4
 7 5 10 6.6 2.8
 -8 -5 -10 20.9 3.1
 -11 6 10 0 2
 -11 6 10 1.8 1.6
 -11 6 10 -2 2.9
 -10 6 10 161.38 13.5
 -10 6 10 169.48 12.3
 -10 6 10 154.98 15.5
 -9 6 10 123.59 9.4
 -9 6 10 103.69 12.6
 -8 6 10 9 2.7
 -8 6 10 13.3 5.5
 7 -6 -10 456.55 34.3
 -7 6 10 517.75 37.9
 -7 6 10 471.65 33.4
 6 -6 -10 8.2 2.7
 -6 6 10 5.3 4.3
 -6 6 10 9.4 4.4
 5 -6 -10 600.64 42.7
 -5 6 10 626.24 45.2
 4 -6 -10 218.08 16
 4 -6 -10 167.38 15.1
 -4 6 10 197.68 16.1
 -4 6 10 233.88 18.1
 3 -6 -10 3.1 2.2
 -3 6 10 3.8 3.5
 -3 6 10 4.2 2.5
 2 -6 -10 709.13 47.8
 -2 6 10 675.03 47.7
 1 -6 -10 56.09 6.4
 1 -6 -10 75.09 7.1
 -1 6 10 56.39 11.2
 -1 6 10 71.39 6.9
 -1 6 10 53.39 5.7
 0 -6 -10 254.77 18.9
 0 -6 -10 249.97 19.5
 0 6 10 278.17 19.6
 0 6 10 252.57 21.1
 -1 -6 -10 419.36 32.5
 -1 -6 -10 462.75 31.9
 1 6 10 487.75 32.7
 -2 -6 -10 29.5 4.2
 2 6 10 30.7 4.9
 -3 -6 -10 2.9 2.5
 3 6 10 4.5 3.2
 -4 -6 -10 130.29 10.6
 4 6 10 111.89 11.4
 4 6 10 128.29 10
 -5 -6 -10 150.08 11.6
 5 6 10 135.49 10.8
 -6 -6 -10 2.2 2.4
 6 6 10 4.3 2.7
 -7 -6 -10 22.9 3.6
 7 6 10 28 4
 -11 7 10 -0.5 1.5
 -11 7 10 0.9 2.1
 -10 7 10 48.9 8.2
 -10 7 10 51.69 6.8
 -10 7 10 57.49 5.4
 -9 7 10 128.09 10.5
 -9 7 10 133.99 14.5
 -8 7 10 313.07 26.7
 -8 7 10 315.87 22.6
 7 -7 -10 414.26 30.1
 -7 7 10 399.76 29
 -7 7 10 450.05 33.4
 -7 7 10 390.26 31.6
 6 -7 -10 374.36 27.2
 -6 7 10 391.66 30.2
 -6 7 10 345.77 28.8
 5 -7 -10 119.89 10.5
 -5 7 10 128.19 13
 -5 7 10 99.29 12
 4 -7 -10 49.4 5.9
 -4 7 10 37.9 7.4
 3 -7 -10 1.7 2.2
 3 -7 -10 5.7 2.8
 -3 7 10 2.7 2.6
 -3 7 10 11.8 6.5
 2 -7 -10 126.79 10.9
 2 -7 -10 115.59 11.4
 -2 7 10 133.99 11.3
 -2 7 10 139.49 9.9
 -2 7 10 136.89 13.5
 1 -7 -10 66.49 7.6
 1 -7 -10 63.99 6.9
 -1 7 10 70.39 9.6
 -1 7 10 77.19 7.4
 -1 7 10 66.49 6
 0 -7 -10 7.7 3.5
 0 -7 -10 8.4 2.9
 0 7 10 6 4
 0 7 10 5.3 2
 0 7 10 1.6 4.7
 0 7 10 5.6 2.8
 -1 -7 -10 653.93 43.2
 -1 -7 -10 598.74 44
 1 7 10 635.34 42.7
 1 7 10 618.74 43.9
 -2 -7 -10 23.9 4.5
 2 7 10 31.7 4
 2 7 10 25.6 5
 -3 -7 -10 9.7 3
 3 7 10 7 2.4
 3 7 10 10.4 3.8
 -4 -7 -10 123.69 10
 4 7 10 110.99 9.1
 -5 -7 -10 69.99 6.5
 5 7 10 57.19 5.5
 -6 -7 -10 23.6 3.6
 -7 -7 -10 11.5 2.4
 -11 8 10 54.29 4.6
 -11 8 10 46.3 5.3
 -10 8 10 98.59 8.3
 -10 8 10 124.29 12
 -10 8 10 85.49 9.5
 -9 8 10 117.29 10
 -9 8 10 137.99 14.2
 -8 8 10 285.27 19.7
 -8 8 10 255.87 23.6
 -7 8 10 99.09 11.4
 -7 8 10 101.79 8.8
 6 -8 -10 21.6 4.4
 -6 8 10 15.4 5.3
 -6 8 10 26.2 6.7
 5 -8 -10 7.4 3.2
 -5 8 10 4.3 4
 -5 8 10 3.1 3.8
 4 -8 -10 48.2 6.7
 -4 8 10 82.19 10.1
 -4 8 10 51.29 9
 3 -8 -10 454.05 31
 -3 8 10 402.76 32.7
 -3 8 10 417.26 29.1
 2 -8 -10 292.17 24.7
 -2 8 10 338.47 23.2
 -2 8 10 338.87 26.8
 -2 8 10 364.86 27.3
 1 -8 -10 99.49 11.6
 1 -8 -10 123.39 11.1
 -1 8 10 154.08 14.6
 -1 8 10 157.68 14.4
 -1 8 10 145.89 10.4
 0 -8 -10 79.59 8.7
 0 -8 -10 79.09 7.7
 0 8 10 79.19 6.9
 0 8 10 80.99 10.9
 -1 -8 -10 66.19 7.4
 1 8 10 78.19 10.3
 1 8 10 68.29 6.4
 -2 -8 -10 86.29 8.2
 2 8 10 85.19 7.4
 -3 -8 -10 9.2 3.3
 3 8 10 13.9 2.6
 -4 -8 -10 8.4 3
 4 8 10 9.3 2.2
 -5 -8 -10 71.09 6.3
 5 8 10 57.69 5.3
 -6 -8 -10 54.49 5.3
 -11 9 10 107.59 8.7
 -11 9 10 105.99 7.9
 -10 9 10 157.88 11.3
 -10 9 10 150.18 14.8
 -10 9 10 151.48 12.7
 -9 9 10 -0.3 1.6
 -9 9 10 2.1 3.8
 -8 9 10 35.1 6.7
 -8 9 10 35.7 7.5
 -8 9 10 26.7 4
 -7 9 10 90.79 11.9
 -7 9 10 100.09 8.6
 -7 9 10 100.89 11.3
 -6 9 10 2.1 3.6
 -6 9 10 0.9 3.9
 5 -9 -10 83.19 9.2
 -5 9 10 93.59 11.3
 -5 9 10 95.39 12
 4 -9 -10 451.25 34
 -4 9 10 477.65 36.3
 -4 9 10 486.35 36.9
 3 -9 -10 595.54 42.3
 -3 9 10 590.24 40.5
 -3 9 10 604.24 44.4
 2 -9 -10 55.49 7.9
 -2 9 10 69.69 9.7
 -2 9 10 72.39 10.6
 -2 9 10 68.39 6
 1 -9 -10 97.69 10.4
 -1 9 10 113.89 12.2
 -1 9 10 123.19 13.2
 -1 9 10 100.09 8.6
 0 -9 -10 18.9 4.6
 0 -9 -10 17.9 3.5
 0 9 10 16.5 3
 0 9 10 9.5 5.7
 -1 -9 -10 29.9 4.4
 1 9 10 24 3.6
 1 9 10 30.5 7
 -2 -9 -10 6.4 2.8
 2 9 10 2.8 1.9
 -3 -9 -10 13.4 3.3
 3 9 10 7.3 2.2
 -4 -9 -10 9.8 2.7
 4 9 10 9.5 2.1
 -5 -9 -10 22 3.4
 -10 10 10 185.88 18
 -10 10 10 160.48 13.5
 -10 10 10 177.48 12.4
 -9 10 10 154.28 13
 -9 10 10 214.08 17.8
 -8 10 10 0.3 3.5
 -8 10 10 0.7 1.9
 -8 10 10 7.1 4.6
 -7 10 10 35.7 4.9
 -7 10 10 51.89 9.1
 -7 10 10 42.5 7.8
 -6 10 10 34.4 7.4
 -6 10 10 52.99 9.1
 -5 10 10 97.99 12.2
 -5 10 10 89.59 11.3
 -4 10 10 277.77 23.9
 -4 10 10 299.77 25
 -3 10 10 31 4
 -3 10 10 29.7 6.7
 -2 10 10 36.5 7.2
 -2 10 10 30.2 4.1
 -1 10 10 12.1 4.8
 -1 10 10 13 5.8
 -1 10 10 7.5 2.4
 0 10 10 0 4.9
 0 10 10 3.4 1.9
 -1 -10 -10 39 5.3
 1 10 10 35.7 7.4
 1 10 10 46.8 4.7
 -2 -10 -10 19.6 3.7
 2 10 10 15.4 2.8
 -3 -10 -10 131.29 10.6
 3 10 10 132.89 10
 -4 -10 -10 38.5 4.2
 4 10 10 33 3.6
 -10 11 10 25.1 3.6
 -9 11 10 2.8 4.3
 -9 11 10 2.6 2.5
 -9 11 10 5.8 1.6
 -8 11 10 13.9 2.6
 -8 11 10 15.2 5.4
 -8 11 10 10.9 4.4
 -7 11 10 94.79 12.2
 -7 11 10 121.19 9
 -7 11 10 107.99 11.5
 -6 11 10 -0.3 4.1
 -6 11 10 1.4 3.9
 -5 11 10 172.08 18.1
 -5 11 10 246.88 19.7
 -4 11 10 4.1 2.2
 -4 11 10 3.1 4.2
 -3 11 10 22.4 6
 -3 11 10 22.8 3.4
 -2 11 10 6.1 4.5
 -2 11 10 6.8 2.3
 -1 11 10 32.8 4.2
 0 11 10 11 2.6
 0 11 10 6.4 5
 1 11 10 111.49 8.9
 -2 -11 -10 128.29 12.4
 2 11 10 127.89 9.8
 -3 -11 -10 88.79 7.3
 3 11 10 77.89 6.5
 -9 12 10 24.1 2.5
 -9 12 10 19.2 3.2
 -8 12 10 4.4 3.2
 -8 12 10 3.2 1.5
 -8 12 10 1.1 4.1
 -7 12 10 163.08 15.3
 -7 12 10 198.68 16.6
 -7 12 10 164.68 12.7
 -6 12 10 24.7 6
 -5 12 10 74.99 9.7
 -4 12 10 135.29 13.9
 -4 12 10 151.98 11
 -3 12 10 2.8 2
 -3 12 10 2.3 3.6
 -2 12 10 27 5.9
 -2 12 10 30.2 3.9
 -1 12 10 10.9 2.6
 0 12 10 73.99 6.5
 1 12 10 26.2 3.3
 2 12 10 5.3 1.6
 -8 13 10 27.2 4.5
 -7 13 10 0 1.2
 -7 13 10 0.5 2.9
 -6 13 10 1.4 1.6
 -6 13 10 -0.4 3.1
 -5 13 10 89.19 9.8
 -4 13 10 112.39 10.7
 -4 13 10 93.59 7.9
 -3 13 10 15.3 2.5
 -3 13 10 8.5 3.9
 -2 13 10 3.3 1.8
 -1 13 10 0.5 1.6
 0 13 10 2.9 1.6
 -6 14 10 0.7 2.4
 -5 14 10 -0.3 1.2
 -5 14 10 1.1 2.6
 -4 14 10 5.9 3
 -3 14 10 6.9 1.8
 -3 15 -11 27.4 3.2
 -4 15 -11 8.9 2.1
 -5 15 -11 -0.6 1.5
 -6 15 -11 0.2 1.6
 0 14 -11 26.1 5.5
 0 14 -11 15.2 3.5
 -1 14 -11 -0.5 2.7
 -2 14 -11 46.9 5
 -2 14 -11 47.3 6.4
 -3 14 -11 137.99 10.9
 -3 14 -11 147.59 12.2
 -4 14 -11 1.9 2.1
 -4 14 -11 1.5 3.5
 -5 14 -11 -2 3.2
 -5 14 -11 -0.9 2
 -6 14 -11 1.2 3.4
 -6 14 -11 -1.5 1.8
 -6 14 -11 -1.5 1.8
 -7 14 -11 26.9 3.5
 -7 14 -11 25.7 3.4
 -8 14 -11 9.7 2.1
 2 13 -11 8.5 2.9
 1 13 -11 2.8 2.9
 1 13 -11 1 2.7
 0 13 -11 -0.6 2.8
 0 13 -11 4.6 3.1
 0 13 -11 -1 1.9
 -1 13 -11 10.1 3.9
 -1 13 -11 10.1 2.8
 -2 13 -11 -3.4 3.1
 -2 13 -11 2.5 2.3
 -3 13 -11 3.5 2.5
 -3 13 -11 1.8 3.5
 -3 13 -11 7.4 4.4
 -4 13 -11 1.4 2.3
 -4 13 -11 1.9 2.4
 -4 13 -11 2.8 3.8
 -5 13 -11 11.5 4.8
 -5 13 -11 6.3 2.8
 -5 13 -11 5 2.4
 -6 13 -11 3 2.5
 -6 13 -11 3.7 2.3
 -6 13 -11 3.3 3.9
 -7 13 -11 7.2 2.7
 -7 13 -11 5.7 4
 -7 13 -11 4.3 2.3
 -8 13 -11 0.7 2
 -9 13 -11 23.4 3.2
 3 12 -11 2.2 2.6
 2 12 -11 8.2 2.8
 2 12 -11 5.6 3
 2 12 -11 8.6 3.4
 1 12 -11 14.7 3.8
 1 12 -11 21.5 4.4
 1 12 -11 13.4 3.2
 0 12 -11 60.19 6.8
 0 12 -11 67.99 7.9
 0 12 -11 74.49 8.1
 -1 12 -11 0.8 3.2
 -1 12 -11 3 2.3
 -2 12 -11 66.19 8.3
 -2 12 -11 56.19 6
 -2 12 -11 60.19 8.8
 -2 12 -11 44.6 5.9
 -3 12 -11 433.36 31
 -3 12 -11 405.46 31.8
 -3 12 -11 408.76 29.1
 -3 12 -11 407.96 29.2
 -4 12 -11 19 3.8
 -4 12 -11 15 3.2
 -4 12 -11 11 5.2
 -4 12 -11 20.1 5.1
 -5 12 -11 1 4.3
 -5 12 -11 3.1 2.7
 -5 12 -11 5.5 2.2
 -5 12 -11 2 2.7
 -6 12 -11 1 2.4
 -6 12 -11 2.6 2.7
 -6 12 -11 3.6 4.4
 -7 12 -11 87.89 7.8
 -7 12 -11 72.59 7.7
 -7 12 -11 83.79 10.2
 -8 12 -11 8.5 2.6
 -8 12 -11 8.2 2.7
 -9 12 -11 0.4 2
 4 11 -11 24.7 4.2
 3 11 -11 23.8 4.1
 3 11 -11 25.3 4.3
 3 11 -11 28.5 4.9
 2 11 -11 -0.7 2.4
 2 11 -11 0.5 2.6
 2 11 -11 0.5 3
 1 11 -11 1.7 3.2
 1 11 -11 4.1 2.9
 1 11 -11 3 2.4
 0 11 -11 4.4 3.2
 0 11 -11 6.8 3.6
 0 11 -11 4.5 2.5
 -1 11 -11 134.49 12.2
 -1 11 -11 160.68 12.2
 -1 11 -11 183.68 15.4
 -1 11 -11 142.79 13.6
 -2 11 -11 261.47 21.3
 -2 11 -11 279.47 19.7
 -2 11 -11 225.58 19.4
 -2 11 -11 304.77 22.8
 -3 11 -11 -0.7 3.5
 -3 11 -11 2.6 2.6
 -3 11 -11 2 4.3
 -3 11 -11 1 2.1
 -4 11 -11 2.9 4.7
 -4 11 -11 4.1 2.7
 -4 11 -11 -2.8 2.2
 -4 11 -11 2.4 2
 -4 11 -11 5.7 3.8
 -4 11 -11 14 6.3
 -5 11 -11 -0.5 4
 -5 11 -11 1.6 2.5
 -5 11 -11 6 5.1
 -5 11 -11 1.7 1.9
 -5 11 -11 3.5 2.9
 -6 11 -11 2.7 2.6
 -6 11 -11 3 4.3
 -6 11 -11 2.3 4.5
 -6 11 -11 6.4 2.9
 -6 11 -11 4 2.1
 -7 11 -11 44.5 8.3
 -7 11 -11 59.49 6.5
 -7 11 -11 61.39 6.7
 -8 11 -11 48.8 5.9
 -9 11 -11 4.7 2.5
 -10 11 -11 -1.2 1.9
 5 10 -11 22.8 3.9
 -5 -10 11 10.1 4.1
 4 10 -11 -1.3 2.2
 4 10 -11 -1.9 2.6
 3 10 -11 2.5 2.7
 3 10 -11 4.9 3.2
 3 10 -11 2.7 2.9
 2 10 -11 5.5 2.9
 2 10 -11 7.4 3.5
 2 10 -11 6.6 3.2
 1 10 -11 1.5 2.4
 1 10 -11 1.1 2.9
 1 10 -11 -0.7 2.7
 0 10 -11 7 2.8
 0 10 -11 5.8 3.2
 0 10 -11 3.9 3.1
 -1 10 -11 39.3 7.3
 -1 10 -11 22 4
 -1 10 -11 20.6 4.7
 -1 10 -11 22 3.9
 -2 10 -11 68.79 11.6
 -2 10 -11 59.49 6.5
 -2 10 -11 77.49 10.1
 -2 10 -11 61.29 6.5
 -2 10 -11 62.19 8.5
 -2 10 -11 56.39 6.5
 -3 10 -11 67.19 6.7
 -3 10 -11 52.29 10.6
 -3 10 -11 73.09 10.2
 -3 10 -11 60.69 8.3
 -3 10 -11 65.79 6.7
 -3 10 -11 57.29 6.3
 -3 10 -11 63.29 5.7
 -4 10 -11 -0.6 2.2
 -4 10 -11 -1 4.2
 -4 10 -11 1.2 1.7
 -4 10 -11 0.6 2.3
 -4 10 -11 -0.1 4.2
 -4 10 -11 3 3.1
 -5 10 -11 24 4.4
 -5 10 -11 23.6 3.4
 -5 10 -11 17.6 6.1
 -5 10 -11 21.9 7.1
 -5 10 -11 23.7 4.2
 -6 10 -11 128.09 10.3
 -6 10 -11 119.79 13.8
 -6 10 -11 135.09 11.5
 -6 10 -11 139.89 15.7
 -6 10 -11 131.99 11.2
 -7 10 -11 14.7 5.4
 -7 10 -11 6.1 5
 -7 10 -11 11.1 2.7
 -7 10 -11 9.3 3.2
 -7 10 -11 9.4 3.1
 -8 10 -11 5 2.9
 -8 10 -11 3.3 3.8
 -9 10 -11 4 2.5
 -9 10 -11 1.8 2.4
 -10 10 -11 11.6 2.8
 -10 10 -11 7.7 2.7
 6 9 -11 12.3 3
 5 9 -11 15.3 3.7
 4 9 -11 25.3 4.3
 4 9 -11 23.6 4.9
 3 9 -11 9.4 5.5
 3 9 -11 15.8 4.2
 3 9 -11 16 3.6
 2 9 -11 70.39 7.7
 2 9 -11 70.19 7.2
 2 9 -11 56.49 7.2
 -2 -9 11 53.79 7.4
 1 9 -11 12.7 3.7
 1 9 -11 17.1 3.7
 1 9 -11 12.5 3.9
 0 9 -11 84.19 8.4
 0 9 -11 62.59 7.6
 0 9 -11 64.09 7
 -1 9 -11 41.2 6.3
 -1 9 -11 40.2 5.2
 -1 9 -11 33.1 7.2
 -1 9 -11 47 9.4
 -2 9 -11 26.8 3.9
 -2 9 -11 23.8 3.9
 -2 9 -11 15.2 6.1
 -2 9 -11 24.2 3.4
 -2 9 -11 29 6.6
 -2 9 -11 30.4 4.1
 -2 9 -11 23.2 5
 -3 9 -11 8.1 2.6
 -3 9 -11 10.3 3.1
 -3 9 -11 9.5 2.8
 -3 9 -11 11.3 5.2
 -3 9 -11 0.6 3.8
 -3 9 -11 4.8 3.4
 -3 9 -11 6.1 2.1
 -4 9 -11 3.3 3
 -4 9 -11 3.1 4.4
 -4 9 -11 2 2.4
 -4 9 -11 -0.5 4
 -4 9 -11 3 1.9
 -4 9 -11 1.2 2.4
 -5 9 -11 95.29 9.1
 -5 9 -11 120.89 13.3
 -5 9 -11 125.99 10.5
 -5 9 -11 136.99 10.3
 -6 9 -11 130.09 13.5
 -6 9 -11 124.19 10.7
 -6 9 -11 130.29 11.1
 -6 9 -11 127.09 14.8
 -6 9 -11 117.19 9.9
 -7 9 -11 7.4 2.8
 -7 9 -11 3.9 2.9
 -7 9 -11 14.1 5.8
 -7 9 -11 5.5 4.4
 -7 9 -11 8.3 2.7
 -7 9 -11 2.1 2.7
 -8 9 -11 19.9 4
 -8 9 -11 15.7 4
 -9 9 -11 122.79 10.1
 -9 9 -11 94.49 9.4
 -10 9 -11 11.9 3.2
 -11 9 -11 1.8 2
 7 8 -11 21.2 3.6
 6 8 -11 2.2 2.8
 -6 -8 11 0.9 3.2
 5 8 -11 8.8 3.7
 5 8 -11 9 3.1
 4 8 -11 33.5 5.7
 4 8 -11 30.9 5
 3 8 -11 37.4 5.7
 3 8 -11 44.8 5.6
 -3 -8 11 29.4 5.6
 2 8 -11 724.63 49.99
 2 8 -11 693.23 49.6
 2 8 -11 775.92 49.5
 -2 -8 11 668.03 49.5
 1 8 -11 213.38 17.1
 1 8 -11 229.38 17
 1 8 -11 218.98 17.4
 0 8 -11 265.87 22.8
 0 8 -11 242.48 18.5
 0 8 -11 224.48 18.9
 0 8 -11 267.47 18.5
 0 8 -11 228.38 20.3
 -1 8 -11 50.69 5.4
 -1 8 -11 51.29 5.6
 -1 8 -11 36.5 7.2
 -1 8 -11 55.49 6.7
 -1 8 -11 49.5 4.9
 -2 8 -11 130.09 11.6
 -2 8 -11 119.69 9.8
 -2 8 -11 112.19 13.7
 -2 8 -11 129.49 10.3
 -2 8 -11 135.39 10.5
 -2 8 -11 138.09 10.3
 -2 8 -11 130.19 13
 -3 8 -11 12.6 3.8
 -3 8 -11 16 3.1
 -3 8 -11 15.6 3.4
 -3 8 -11 16.6 3
 -3 8 -11 17.8 2.9
 -3 8 -11 14.5 5.2
 -4 8 -11 169.78 15.1
 -4 8 -11 163.48 11.9
 -4 8 -11 125.29 11.2
 -4 8 -11 148.39 12.2
 -5 8 -11 515.05 36.5
 -5 8 -11 550.24 37.1
 -5 8 -11 498.35 41.3
 -5 8 -11 588.34 37.7
 -5 8 -11 525.85 39.6
 -6 8 -11 51.59 6.2
 -6 8 -11 59.39 8.8
 -6 8 -11 58.69 6.8
 -6 8 -11 68.69 5.9
 -6 8 -11 56.39 6.7
 -7 8 -11 50.29 6.6
 -7 8 -11 48.7 6
 -7 8 -11 59.09 6
 -7 8 -11 73.39 10.6
 -7 8 -11 59.99 7.1
 -8 8 -11 34.8 5.7
 -8 8 -11 35.1 5.3
 -8 8 -11 45.2 5
 -9 8 -11 90.19 9
 -9 8 -11 85.89 8.3
 -10 8 -11 2.8 2.7
 -11 8 -11 0.9 2.2
 7 7 -11 -1.7 2.4
 -7 -7 11 -1.1 3.2
 6 7 -11 12.4 4
 -6 -7 11 13.4 5.4
 5 7 -11 0.4 3.1
 5 7 -11 3 2.5
 4 7 -11 1.7 3
 4 7 -11 2.8 2.3
 -4 -7 11 -0.9 3.5
 3 7 -11 245.88 18
 3 7 -11 239.28 18.6
 -3 -7 11 231.58 18.5
 2 7 -11 1.4 2
 2 7 -11 0.7 2.4
 -2 -7 11 1.8 2.5
 1 7 -11 433.86 31
 1 7 -11 448.76 30.8
 -1 -7 11 428.26 30.4
 0 7 -11 69.99 6
 0 7 -11 45.5 6.3
 0 7 -11 49.5 5
 -1 7 -11 36.5 4.6
 -1 7 -11 35.7 3.9
 -1 7 -11 19.1 5.2
 -1 7 -11 33.2 4.4
 -1 7 -11 39.2 5.4
 -2 7 -11 21.6 3.8
 -2 7 -11 29.6 5.9
 -2 7 -11 30.4 3.6
 -2 7 -11 26.8 4.7
 -2 7 -11 21.3 3.3
 -2 7 -11 18.9 5.7
 -3 7 -11 17.8 5.5
 -3 7 -11 4.9 2.1
 -3 7 -11 -1.5 3.2
 -3 7 -11 2.5 2.3
 -3 7 -11 6 2.3
 -3 7 -11 6.1 2.7
 -4 7 -11 2.8 3.7
 -4 7 -11 0.6 3.2
 -4 7 -11 0.9 1.8
 -4 7 -11 0.4 2.3
 -4 7 -11 0.9 1.9
 -5 7 -11 15.6 5.6
 -5 7 -11 1.5 2.5
 -5 7 -11 5.3 2.4
 -5 7 -11 2 2.5
 -5 7 -11 4.5 3.6
 -5 7 -11 7 2.2
 -6 7 -11 206.58 14.7
 -6 7 -11 193.08 15.7
 -6 7 -11 205.38 19.3
 -6 7 -11 203.18 14.9
 -6 7 -11 172.18 15.2
 -7 7 -11 3.3 2.1
 -7 7 -11 2.7 3.7
 -7 7 -11 2.6 2.7
 -7 7 -11 2.8 2.7
 -8 7 -11 122.29 10.7
 -8 7 -11 121.69 10
 -8 7 -11 127.49 11.5
 -9 7 -11 -0.7 2.8
 -10 7 -11 -2.1 2.4
 -11 7 -11 -0.6 2.1
 8 6 -11 156.08 12.3
 7 6 -11 7 3.1
 -7 -6 11 4.3 4.1
 6 6 -11 57.59 6.2
 6 6 -11 59.19 7.2
 -6 -6 11 37.3 8.8
 5 6 -11 -1.8 2.2
 5 6 -11 3.5 3.2
 4 6 -11 0.6 2.6
 4 6 -11 -0.1 2.1
 -4 -6 11 -1.4 2.8
 3 6 -11 73.29 7.7
 3 6 -11 71.59 7.1
 -3 -6 11 72.29 7.5
 2 6 -11 42.2 5.9
 2 6 -11 45.4 5.7
 -2 -6 11 65.79 6
 1 6 -11 336.37 26.3
 1 6 -11 285.97 22.8
 -1 -6 11 339.57 22.7
 0 6 -11 196.68 17.8
 -1 6 -11 2.1 3.1
 -2 6 -11 2.5 3.3
 -3 6 -11 290.77 21.2
 -3 6 -11 308.87 25.2
 -4 6 -11 146.19 11.7
 -4 6 -11 169.18 11.9
 -4 6 -11 140.39 12.1
 -4 6 -11 183.38 16.3
 -4 6 -11 137.09 13.7
 -5 6 -11 86.39 7.7
 -5 6 -11 87.19 6.8
 -5 6 -11 83.29 9.7
 -5 6 -11 100.49 7.7
 -5 6 -11 93.89 8.2
 -5 6 -11 89.59 8.4
 -6 6 -11 17 3.2
 -6 6 -11 24 3.1
 -6 6 -11 25 4.2
 -6 6 -11 19 4.2
 -7 6 -11 37.9 5.3
 -7 6 -11 38 4.9
 -7 6 -11 59.49 9.6
 -7 6 -11 41.2 6.1
 -8 6 -11 -0.2 1.9
 -8 6 -11 -0.1 2.8
 -9 6 -11 2 2.9
 -10 6 -11 7.3 3.1
 -11 6 -11 27.6 4.1
 8 5 -11 7.1 2.9
 -8 -5 11 9.1 4.6
 7 5 -11 -1.3 2.7
 -7 -5 11 4.2 4.3
 6 5 -11 102.09 9
 6 5 -11 106.19 9.7
 -6 -5 11 76.99 12.5
 5 5 -11 23.5 4.6
 5 5 -11 16.8 3.6
 -5 -5 11 21.9 4.7
 4 5 -11 38.5 5.5
 4 5 -11 33.8 4.8
 -4 -5 11 47.3 5.9
 3 5 -11 10.3 3.1
 3 5 -11 6.7 2.5
 -3 -5 11 10.4 2.9
 -2 -5 11 63.09 6.1
 1 5 -11 409.06 31.8
 -1 -5 11 429.16 28.9
 0 5 -11 219.98 18.3
 0 -5 11 194.88 15.9
 -1 5 -11 5.7 3.6
 -4 5 -11 10.2 2.6
 -4 5 -11 1.2 2.5
 -4 5 -11 7.2 1.5
 -5 5 -11 33.7 4.3
 -5 5 -11 25.8 4.7
 -5 5 -11 36.8 4.7
 -5 5 -11 42.3 4.7
 -5 5 -11 41.9 3.7
 -6 5 -11 551.64 37.7
 -6 5 -11 571.24 36.5
 -6 5 -11 492.35 36.5
 -6 5 -11 515.55 36.9
 -7 5 -11 1.2 2.6
 -7 5 -11 -1.2 1.7
 -8 5 -11 124.99 11.3
 -9 5 -11 182.08 14.9
 -10 5 -11 222.28 17.2
 -11 5 -11 9.2 2.7
 9 4 -11 34.2 4.5
 8 4 -11 21.6 4.2
 -8 -4 11 14.7 5.7
 7 4 -11 1.9 2.8
 -7 -4 11 2.3 4
 -6 -4 11 36.5 8.6
 -6 -4 11 57.59 7.1
 5 4 -11 489.55 34
 5 4 -11 487.55 33.5
 -5 -4 11 452.15 33.9
 4 4 -11 23.6 4.2
 4 4 -11 19.6 3.6
 -4 -4 11 10.8 3.2
 -3 -4 11 71.59 6.8
 -2 -4 11 1297.07 86.69
 -1 -4 11 181.08 13.2
 0 -4 11 1.1 1.3
 -1 4 -11 77.99 6
 -2 4 -11 59.29 4.7
 -3 4 -11 58.39 4.9
 -4 4 -11 172.78 12.4
 -4 4 -11 172.08 13.2
 -5 4 -11 28.4 3.3
 -5 4 -11 19.1 3.5
 -5 4 -11 23.1 4.2
 -6 4 -11 6 2.7
 -6 4 -11 3.5 2
 -6 4 -11 1.8 1.7
 -7 4 -11 11.8 2.7
 -7 4 -11 12.5 3.5
 -8 4 -11 114.39 10.4
 -9 4 -11 0.1 2.6
 -10 4 -11 -0.4 2.3
 -11 4 -11 3.7 2.1
 9 3 -11 32.3 4.6
 -9 -3 11 29.3 6.4
 8 3 -11 158.28 12
 -8 -3 11 111.99 14.7
 7 3 -11 3.4 2.8
 -7 -3 11 3.2 4.3
 6 3 -11 101.39 10.5
 -6 -3 11 103.69 10.6
 -6 -3 11 146.19 14.9
 -5 -3 11 7.6 4.7
 -5 -3 11 0.9 2.3
 4 3 -11 215.58 18.9
 4 3 -11 233.88 16.1
 -4 -3 11 225.38 17.1
 3 3 -11 64.39 5.1
 -3 -3 11 70.49 6.5
 -2 -3 11 82.09 7
 -1 -3 11 0.4 1.4
 0 3 -11 275.17 19.5
 0 -3 11 285.77 19.5
 -1 3 -11 216.78 14.9
 1 -3 11 206.98 14.8
 -2 3 -11 650.53 43.7
 -3 3 -11 626.04 42.2
 -4 3 -11 11.1 2.7
 -4 3 -11 17.2 2.6
 -5 3 -11 51.69 5.1
 -5 3 -11 51.09 5.7
 -6 3 -11 84.49 7.4
 -6 3 -11 80.29 7.9
 -7 3 -11 9 3.1
 -8 3 -11 8.8 3.2
 -9 3 -11 0.6 2.5
 -10 3 -11 13.3 3.2
 -11 3 -11 27.2 4.2
 9 2 -11 14.9 3.5
 -9 -2 11 15.3 5.2
 8 2 -11 47.3 6.3
 -8 -2 11 51.69 9.2
 7 2 -11 39.8 5.9
 -7 -2 11 29.4 7.8
 -7 -2 11 34.6 5.6
 -6 -2 11 65.59 7.9
 -6 -2 11 90.59 11.5
 -5 -2 11 1074.79 74.09
 -5 -2 11 1112.09 77.79
 4 2 -11 71.89 5.8
 4 2 -11 67.29 6.3
 -4 -2 11 88.59 7.4
 -3 -2 11 485.75 33.6
 -2 -2 11 834.52 56.19
 -1 -2 11 37.8 4.1
 0 2 -11 568.04 37.4
 0 -2 11 535.15 37.3
 -1 2 -11 186.38 13.6
 1 -2 11 195.68 13.6
 -2 2 -11 1078.19 72.09
 2 -2 11 1080.69 71.89
 -3 2 -11 295.97 19.9
 3 -2 11 265.17 19.8
 -4 2 -11 9.8 2.7
 -4 2 -11 12.3 2.5
 4 -2 11 13.4 2.9
 -5 2 -11 15.8 2.9
 -5 2 -11 12.6 3.1
 5 -2 11 13.4 3.2
 -6 2 -11 153.38 11.8
 -6 2 -11 129.19 11.3
 6 -2 11 147.49 12
 -7 2 -11 28.8 4.7
 7 -2 11 34.6 5.5
 -8 2 -11 42.2 5.7
 -9 2 -11 39.2 5.4
 -10 2 -11 75.99 7.1
 -10 -1 11 13.3 2.8
 9 1 -11 3.7 2.7
 -9 -1 11 3.4 3.9
 8 1 -11 -1 2.8
 -8 -1 11 -1.3 3.3
 -7 -1 11 27.3 5.2
 -7 -1 11 34.5 7.9
 -6 -1 11 103.79 9.6
 -6 -1 11 102.39 12.4
 5 1 -11 339.47 22.6
 -5 -1 11 295.97 25.9
 -5 -1 11 329.87 23.5
 -4 -1 11 382.26 29.7
 -3 -1 11 1432.56 99.59
 -3 -1 11 1480.35 97.39
 -2 -1 11 22.1 3.3
 1 1 -11 3.7 1.6
 -1 -1 11 2 1.6
 0 1 -11 271.77 18.5
 0 -1 11 253.87 18.4
 -1 1 -11 598.94 40.8
 1 -1 11 604.84 40.7
 -2 1 -11 952.4 63.79
 2 -1 11 944.11 63.59
 -3 1 -11 1.2 1.5
 3 -1 11 2.9 1.8
 -4 1 -11 373.16 26.5
 4 -1 11 384.26 26.9
 -5 1 -11 126.89 10.6
 -5 1 -11 128.99 9.7
 -5 1 -11 128.89 10.5
 5 -1 11 131.59 11.1
 -6 1 -11 47 4.9
 -6 1 -11 45.7 5.6
 6 -1 11 48.1 6.3
 -7 1 -11 4.8 2.2
 -7 1 -11 5.5 2.8
 7 -1 11 5.9 3.4
 -8 1 -11 66.79 6.9
 -8 1 -11 51.89 5.6
 -9 1 -11 132.99 11.2
 -10 1 -11 15.9 3.2
 -10 0 11 31.5 3.8
 -10 0 11 21.6 5.7
 9 0 -11 1.6 2.7
 -9 0 11 0.5 1.8
 -9 0 11 0.1 3.3
 -8 0 11 2.7 4
 -8 0 11 0 2.4
 -7 0 11 300.87 26.1
 -7 0 11 292.97 22.4
 6 0 -11 34 4.1
 -6 0 11 28.4 4.9
 -6 0 11 27 6.9
 5 0 -11 23.6 3.4
 -5 0 11 22.9 5.7
 -5 0 11 27.5 4.3
 -4 0 11 247.68 21.2
 -4 0 11 271.77 19.1
 -3 0 11 37.7 6
 -3 0 11 35.7 4.4
 -2 0 11 1652.63 109.99
 1 0 -11 351.96 25.6
 -1 0 11 387.86 25.7
 0 0 -11 1360.36 93.39
 0 0 11 1444.56 93.39
 -1 0 -11 31.4 3.9
 1 0 11 38.7 4.1
 -2 0 -11 87.09 7.8
 2 0 11 100.09 7.9
 -3 0 -11 9.3 2.5
 3 0 11 5.6 2.4
 -4 0 -11 28 4.3
 -4 0 -11 43.5 5.2
 4 0 11 28.6 4.5
 -5 0 -11 388.16 27.1
 -5 0 -11 365.16 26.2
 5 0 11 383.46 27.4
 -6 0 -11 22.8 3.6
 -6 0 -11 23.6 4.3
 6 0 11 30.7 5.1
 -7 0 -11 116.09 10.1
 -7 0 -11 102.79 9.2
 7 0 11 119.39 10.8
 -8 0 -11 34.1 4.3
 -8 0 -11 33.4 5.1
 -9 0 -11 106.29 9.3
 -11 1 11 5.1 1.9
 -10 1 11 43.7 4.4
 -10 1 11 36.2 7.3
 -9 1 11 11.1 2.7
 -9 1 11 11.5 5
 -8 1 11 115.09 12.9
 -8 1 11 88.79 8.4
 -7 1 11 165.98 14.7
 -7 1 11 173.68 13.6
 -7 1 11 204.18 18.4
 6 -1 -11 47.6 5.4
 -6 1 11 66.69 9.2
 -6 1 11 51.19 6.3
 5 -1 -11 32.3 4.1
 -5 1 11 39.6 7
 -4 1 11 99.89 10.9
 -4 1 11 103.29 8.9
 -3 1 11 663.43 45.4
 -2 1 11 1067.69 71.69
 1 -1 -11 367.66 25.3
 -1 1 11 353.16 25.2
 0 -1 -11 34.6 3.9
 0 1 11 29.2 3.9
 -1 -1 -11 5.6 1.9
 1 1 11 7.8 2.3
 -2 -1 -11 74.49 6.5
 2 1 11 57.59 6.3
 -3 -1 -11 87.29 8.2
 3 1 11 98.09 8.5
 -4 -1 -11 279.47 20.8
 -4 -1 -11 273.77 20.1
 4 1 11 301.27 21.2
 -5 -1 -11 120.09 10.4
 -5 -1 -11 116.49 9.8
 5 1 11 127.29 10.9
 -6 -1 -11 46.3 6
 -6 -1 -11 39.3 4.9
 6 1 11 42.1 6.1
 -7 -1 -11 4.7 2.9
 -7 -1 -11 2.4 2.3
 -8 -1 -11 -0.7 2.2
 -8 -1 -11 1.8 2.5
 -9 -1 -11 72.99 6.3
 -11 2 11 39.2 4.2
 -10 2 11 178.48 12.1
 -10 2 11 144.69 15.2
 -9 2 11 8.3 4.4
 -9 2 11 4.8 2
 -8 2 11 45.7 5.5
 -8 2 11 58.29 9.4
 7 -2 -11 330.07 23.1
 -7 2 11 331.37 27.5
 -7 2 11 308.47 24.1
 -7 2 11 327.87 23
 6 -2 -11 29.7 6.2
 6 -2 -11 40.8 4.4
 -6 2 11 21.5 6
 -6 2 11 40.2 4.4
 -6 2 11 29.2 4.7
 5 -2 -11 1419.76 95.99
 5 -2 -11 1400.36 95.49
 -5 2 11 1479.45 96.39
 -5 2 11 1425.96 98.99
 4 -2 -11 642.64 44.7
 -4 2 11 645.94 47.2
 -4 2 11 672.83 45
 3 -2 -11 9.7 2.3
 -3 2 11 9.3 2.6
 2 -2 -11 385.36 28.5
 -2 2 11 396.66 27.5
 -1 2 11 25.8 3.8
 0 2 11 94.19 8.2
 1 2 11 3.4 2.2
 2 2 11 5.7 2.4
 -3 -2 -11 77.79 7.3
 3 2 11 89.29 8.1
 -4 -2 -11 229.48 17.8
 -4 -2 -11 266.77 18.8
 4 2 11 242.88 18.8
 -5 -2 -11 625.74 43.3
 -5 -2 -11 620.84 42.6
 5 2 11 617.74 43.6
 -6 -2 -11 46.7 6.1
 -6 -2 -11 44.4 5.3
 6 2 11 39.5 6.2
 -7 -2 -11 66.69 6.6
 -8 -2 -11 122.79 9.9
 -9 -2 -11 25.2 3.3
 -11 3 11 29.3 3.5
 -10 3 11 12.3 4.8
 -10 3 11 10.5 2.6
 -9 3 11 2.6 2
 -9 3 11 3.9 3.8
 -8 3 11 77.59 10.6
 -8 3 11 76.59 7
 7 -3 -11 7.3 2.4
 7 -3 -11 8.2 3.1
 -7 3 11 8.8 3.5
 -7 3 11 6.9 2.3
 -7 3 11 12.3 5
 6 -3 -11 256.57 19.7
 6 -3 -11 248.38 19.1
 -6 3 11 285.57 23.2
 -6 3 11 278.77 20.4
 -6 3 11 264.17 19
 5 -3 -11 1.2 1.9
 5 -3 -11 4.4 2.3
 -5 3 11 3.8 2.6
 -5 3 11 8.3 3.9
 4 -3 -11 160.38 12.7
 -4 3 11 165.28 13
 -4 3 11 164.48 14.8
 3 -3 -11 640.14 43.7
 -3 3 11 681.33 44.2
 -3 3 11 602.24 45.4
 2 -3 -11 98.09 8.3
 -2 3 11 105.39 8.9
 1 -3 -11 13.9 2.6
 -1 3 11 15.8 3.1
 0 3 11 51.29 5.7
 1 3 11 49.6 5.7
 -2 -3 -11 4.3 2.2
 2 3 11 2.1 2.2
 -3 -3 -11 237.28 18
 -3 -3 -11 222.08 17.2
 3 3 11 246.68 18.1
 -4 -3 -11 51.89 5.6
 -4 -3 -11 48.2 6.1
 4 3 11 43.7 6.2
 -5 -3 -11 4.7 3.2
 -5 -3 -11 6.6 2.7
 5 3 11 7.5 3.3
 -6 -3 -11 89.49 8.2
 -7 -3 -11 35 4.6
 -8 -3 -11 27.6 3.8
 -9 -3 -11 9.7 2.3
 -11 4 11 46.2 4.5
 -10 4 11 4.3 3.6
 -10 4 11 3.9 2
 -9 4 11 219.98 19.8
 -9 4 11 201.58 15.5
 8 -4 -11 173.88 13.9
 -8 4 11 190.18 13.8
 -8 4 11 181.48 17.7
 7 -4 -11 252.47 20.4
 7 -4 -11 267.97 19.9
 -7 4 11 285.97 23.9
 -7 4 11 285.57 19.8
 6 -4 -11 0.6 1.9
 6 -4 -11 2.5 2.2
 -6 4 11 -1.8 2.4
 -6 4 11 3.9 3.7
 -6 4 11 -2 1.5
 5 -4 -11 615.34 43.2
 -5 4 11 617.44 45.7
 -5 4 11 640.44 43.6
 4 -4 -11 159.58 12.3
 4 -4 -11 143.59 12.6
 -4 4 11 151.58 14.2
 -4 4 11 164.08 12.8
 3 -4 -11 14.8 3
 -3 4 11 11.7 3.1
 -3 4 11 22.1 4.8
 2 -4 -11 8.1 2.2
 -2 4 11 6.9 2.6
 1 -4 -11 156.78 12.7
 -1 4 11 180.48 13.3
 0 4 11 96.29 8.9
 -1 -4 -11 347.67 26.1
 1 4 11 397.46 26.9
 -2 -4 -11 77.39 6.9
 -2 -4 -11 71.09 7.8
 2 4 11 63.49 7.3
 -3 -4 -11 3.7 2.5
 -3 -4 -11 3.3 2.9
 3 4 11 3.5 2.8
 -4 -4 -11 534.05 36.4
 4 4 11 517.35 37.3
 -5 -4 -11 81.99 7.5
 5 4 11 72.59 8.5
 -6 -4 -11 -0.1 2.3
 -7 -4 -11 24.9 3.8
 -8 -4 -11 0.5 2
 8 4 11 2.8 2.4
 -11 5 11 88.99 7.1
 -10 5 11 6.9 2.1
 -10 5 11 5.1 2.7
 -10 5 11 11.4 4.5
 -9 5 11 22.1 3.3
 -9 5 11 18.7 5.8
 -8 5 11 228.68 20.9
 -8 5 11 222.38 16.5
 7 -5 -11 366.06 27.8
 7 -5 -11 384.56 28.7
 -7 5 11 397.06 27.8
 -7 5 11 437.56 32.6
 6 -5 -11 1176.98 82.29
 6 -5 -11 1214.28 82.99
 -6 5 11 1265.57 86.29
 -6 5 11 1207.18 82.19
 -6 5 11 1265.17 84.99
 5 -5 -11 151.58 12
 5 -5 -11 149.29 12.6
 -5 5 11 160.88 15.1
 -5 5 11 154.98 13.1
 4 -5 -11 198.88 15.7
 4 -5 -11 210.18 16.3
 -4 5 11 214.88 16.8
 -4 5 11 227.98 18.6
 3 -5 -11 99.29 8.9
 3 -5 -11 87.39 8.5
 -3 5 11 119.39 11.7
 -3 5 11 103.19 9.4
 2 -5 -11 3.3 2
 -2 5 11 -0.5 2.1
 1 -5 -11 610.04 41
 1 -5 -11 559.04 40.9
 -1 5 11 605.14 41.3
 0 -5 -11 5 2.6
 0 -5 -11 8.6 2.9
 0 5 11 7.4 2.8
 -1 -5 -11 64.49 6.8
 -1 -5 -11 71.29 8.1
 1 5 11 66.49 7.3
 -2 -5 -11 57.09 7.7
 -2 -5 -11 44.4 5.4
 2 5 11 50.69 6.6
 -3 -5 -11 378.96 26.3
 3 5 11 359.16 27.1
 -4 -5 -11 17.2 3.5
 4 5 11 24.5 4.8
 -5 -5 -11 8.8 3
 -6 -5 -11 242.38 16.7
 6 5 11 211.08 16.1
 -7 -5 -11 33.5 4.4
 7 5 11 38.2 5.2
 -8 -5 -11 11 2.2
 -11 6 11 79.59 7.2
 -11 6 11 89.59 6.8
 -10 6 11 3.1 3.5
 -10 6 11 0.6 1.7
 -10 6 11 0.6 2.6
 -9 6 11 133.19 14.8
 -9 6 11 167.38 11.7
 -8 6 11 1.4 3.8
 -8 6 11 2 2.1
 7 -6 -11 2.2 2.5
 -7 6 11 0.9 3.7
 -7 6 11 1.2 1.7
 6 -6 -11 98.09 9.6
 6 -6 -11 106.19 9.7
 -6 6 11 104.69 12.1
 -6 6 11 106.19 11.8
 5 -6 -11 1016.6 69.29
 5 -6 -11 1058.19 70.09
 -5 6 11 995.1 73.49
 -5 6 11 1033.1 72.59
 4 -6 -11 1750.92 117.19
 4 -6 -11 1819.82 117.89
 -4 6 11 1728.23 119.79
 -4 6 11 1729.43 117.99
 3 -6 -11 81.39 8
 3 -6 -11 84.79 7.5
 -3 6 11 79.19 8.1
 2 -6 -11 119.39 10.2
 2 -6 -11 104.09 9.5
 -2 6 11 108.79 8.7
 -2 6 11 122.39 10.3
 1 -6 -11 147.09 11.6
 1 -6 -11 126.79 12
 -1 6 11 144.09 12
 -1 6 11 150.18 10.8
 0 -6 -11 29.2 4.2
 0 -6 -11 21 4.4
 0 -6 -11 36 6.2
 0 6 11 35 6.7
 0 6 11 23.6 4.4
 -1 -6 -11 5.8 4.3
 -1 -6 -11 4.6 2.5
 1 6 11 2.7 2.9
 -2 -6 -11 630.64 41.1
 2 6 11 559.24 41.6
 -3 -6 -11 369.16 24.9
 3 6 11 324.17 25.5
 -4 -6 -11 179.38 13.4
 4 6 11 161.28 12.8
 -5 -6 -11 393.26 27.1
 5 6 11 375.06 26.6
 -6 -6 -11 55.19 5.5
 6 6 11 38.4 4.2
 -7 -6 -11 0.8 1.9
 -11 7 11 204.88 15.9
 -11 7 11 232.88 15.4
 -10 7 11 97.49 10.8
 -10 7 11 90.79 7.4
 -10 7 11 70.29 8.3
 -9 7 11 67.39 10.4
 -9 7 11 94.59 7.4
 -8 7 11 47.8 5.7
 -8 7 11 55.09 9.3
 7 -7 -11 28.3 5.3
 -7 7 11 52.89 8.3
 -7 7 11 38.9 4.7
 -7 7 11 23.2 6.8
 6 -7 -11 78.89 8.4
 -6 7 11 70.49 10.2
 -6 7 11 96.29 11.4
 5 -7 -11 3.6 2.8
 -5 7 11 5.3 3.8
 -5 7 11 3.1 3.8
 4 -7 -11 119.49 10.6
 4 -7 -11 99.69 9.7
 -4 7 11 102.29 12.2
 -4 7 11 134.49 12.9
 3 -7 -11 137.79 12
 3 -7 -11 141.39 11.5
 -3 7 11 143.79 12.2
 2 -7 -11 25.8 4.6
 2 -7 -11 25.1 4.4
 -2 7 11 28.4 3.4
 -2 7 11 22.5 4.5
 1 -7 -11 61.59 7.7
 1 -7 -11 68.69 7.1
 -1 7 11 66.49 7.4
 -1 7 11 68.09 6
 0 -7 -11 75.29 7.6
 0 -7 -11 71.59 8.4
 0 7 11 70.39 9.5
 0 7 11 82.29 6.8
 0 7 11 77.89 10.3
 0 7 11 72.69 8
 -1 -7 -11 16.4 3.5
 1 7 11 14.2 2.8
 1 7 11 9.2 3.5
 -2 -7 -11 1.9 2.3
 2 7 11 1.8 2
 2 7 11 3.3 3.3
 -3 -7 -11 30.7 4.7
 3 7 11 27.1 3.9
 -4 -7 -11 7.5 2.9
 4 7 11 8.2 2.3
 -5 -7 -11 -1 2.3
 5 7 11 0.1 1.5
 -6 -7 -11 36.8 4.4
 -11 8 11 11.4 1.9
 -11 8 11 8.4 2.4
 -10 8 11 137.39 11.9
 -10 8 11 146.29 10.7
 -10 8 11 140.09 13.7
 -9 8 11 222.18 15.2
 -9 8 11 188.98 18.5
 -8 8 11 8.8 4.9
 -8 8 11 4.1 2.3
 -7 8 11 3.6 4.3
 -7 8 11 3.7 3.9
 -7 8 11 0.1 2
 6 -8 -11 19.8 4.5
 -6 8 11 17.7 5.7
 -6 8 11 34.5 6.8
 5 -8 -11 19.6 4.3
 -5 8 11 15.3 5.4
 -5 8 11 29.4 6.7
 4 -8 -11 88.49 9.3
 -4 8 11 107.79 12.1
 -4 8 11 87.39 11.2
 3 -8 -11 48.3 6.2
 3 -8 -11 33.3 5.8
 -3 8 11 50.29 8.5
 -3 8 11 51.69 4.8
 2 -8 -11 112.89 10.5
 2 -8 -11 107.69 9.7
 -2 8 11 108.39 8.6
 -2 8 11 102.59 12.3
 1 -8 -11 184.88 14.7
 1 -8 -11 197.48 15.9
 -1 8 11 187.88 17.5
 -1 8 11 176.88 17.5
 -1 8 11 192.88 13.9
 0 -8 -11 116.39 10
 0 8 11 112.09 12.8
 0 8 11 111.49 9.1
 -1 -8 -11 3.5 2.8
 1 8 11 7.1 2.3
 -2 -8 -11 -1.4 2.3
 2 8 11 0 1.6
 -3 -8 -11 3.9 2.7
 3 8 11 1.9 1.8
 -4 -8 -11 28.7 4.1
 4 8 11 21.3 3.1
 -5 -8 -11 31.8 4.1
 -6 -8 -11 2.6 1.8
 -10 9 11 39.4 7.6
 -10 9 11 42.5 4.1
 -10 9 11 37.6 5.2
 -9 9 11 -1.9 3.3
 -9 9 11 -0.9 1.6
 -8 9 11 194.78 14.9
 -8 9 11 210.18 17.5
 -8 9 11 193.08 18.7
 -7 9 11 -0.9 3.6
 -7 9 11 1.6 2.2
 -7 9 11 4.2 4
 -6 9 11 9.8 4.9
 -6 9 11 7.6 4.7
 -5 9 11 122.09 13.5
 -5 9 11 110.89 12.8
 4 -9 -11 3.4 3.1
 -4 9 11 7.1 4.6
 3 -9 -11 24.7 4.7
 -3 9 11 8.7 4.8
 -3 9 11 13.2 2.6
 2 -9 -11 147.89 12.9
 -2 9 11 137.89 10.8
 -2 9 11 142.39 14.4
 1 -9 -11 53.29 6.3
 1 -9 -11 47 6.9
 -1 9 11 43.6 8.1
 -1 9 11 48.8 5
 0 -9 -11 208.88 16.3
 0 9 11 222.18 19.3
 0 9 11 207.98 15.5
 -1 -9 -11 146.29 11.8
 1 9 11 140.79 11
 -2 -9 -11 2 2.6
 2 9 11 -1 1.7
 -3 -9 -11 44.5 5.3
 3 9 11 45.1 4.6
 -4 -9 -11 33.3 4.2
 4 9 11 27 3.3
 -5 -9 -11 14.5 2.6
 -10 10 11 96.39 7.1
 -10 10 11 91.39 8.2
 -9 10 11 14.6 5.2
 -9 10 11 15.5 2.7
 -8 10 11 17.6 5.8
 -8 10 11 22.9 5.3
 -7 10 11 3.1 3.9
 -7 10 11 0.1 2
 -7 10 11 8.5 4.8
 -6 10 11 3.7 4.4
 -6 10 11 -0.3 3.6
 -5 10 11 9.1 4.9
 -5 10 11 2 4.1
 -4 10 11 78.79 10.5
 -3 10 11 118.79 12.7
 -3 10 11 111.19 9.1
 -2 10 11 2.3 3.9
 -2 10 11 4.2 2.1
 -1 10 11 9.5 4.6
 -1 10 11 10.3 2.6
 0 -10 -11 102.39 9.3
 0 10 11 105.39 8.5
 -1 -10 -11 52.49 6.1
 1 10 11 54.89 5.3
 -2 -10 -11 24.9 3.9
 2 10 11 24.5 3.3
 -3 -10 -11 59.09 5.9
 3 10 11 58.69 5.2
 -4 -10 -11 14 2.8
 4 10 11 23.5 3.8
 -9 11 11 1.4 2.1
 -9 11 11 2.5 1.3
 -8 11 11 35.3 7.1
 -8 11 11 26.9 3.6
 -8 11 11 35.4 6
 -7 11 11 3.9 3.7
 -7 11 11 5 2.2
 -7 11 11 0.2 4.1
 -6 11 11 12 5
 -6 11 11 22.9 6.2
 -5 11 11 27.1 6.6
 -4 11 11 153.08 15
 -3 11 11 23.9 6.1
 -3 11 11 29.2 3.8
 -2 11 11 21.3 3.4
 -2 11 11 18.2 5.6
 -1 11 11 9.4 2.4
 0 11 11 91.59 7.7
 -1 -11 -11 -2.5 2.6
 1 11 11 2.1 1.7
 -2 -11 -11 51.19 5.3
 2 11 11 49.8 4.7
 3 11 11 10.2 2.2
 -8 12 11 41.9 3.9
 -7 12 11 60.69 4.9
 -7 12 11 45.6 8.3
 -7 12 11 49.3 7.3
 -6 12 11 11.3 5.4
 -6 12 11 19.7 5
 -5 12 11 56.19 8.2
 -4 12 11 0.6 1.9
 -4 12 11 -0.6 3.5
 -3 12 11 52.59 7.6
 -3 12 11 48.1 5
 -2 12 11 -0.2 1.7
 -2 12 11 -2.7 3.2
 -1 12 11 11.3 2.4
 0 12 11 -0.4 1.6
 1 12 11 8 2
 -7 13 11 8.1 1.6
 -7 13 11 6.6 3.2
 -6 13 11 3.5 1.6
 -6 13 11 0.7 3
 -5 13 11 0.8 2.9
 -4 13 11 -2.6 2.6
 -3 13 11 38.1 6
 -3 13 11 42.8 4.1
 -2 13 11 1.8 1.6
 -1 13 11 35.2 3.7
 -4 15 -12 4 1.7
 -5 15 -12 -0.7 1.5
 -1 14 -12 -0.8 2.4
 -2 14 -12 11.3 3.3
 -3 14 -12 1.9 1.9
 -4 14 -12 7.7 2.3
 -5 14 -12 1.2 2
 -6 14 -12 0.7 1.9
 -6 14 -12 0.9 1.8
 -7 14 -12 2 1.8
 -7 14 -12 4.3 2
 2 13 -12 4.9 2.6
 1 13 -12 7 3
 1 13 -12 5.6 2.2
 1 13 -12 2.8 2.9
 0 13 -12 -0.7 1.9
 0 13 -12 -0.7 2.7
 -1 13 -12 1.6 3
 -1 13 -12 5.3 2.3
 -2 13 -12 326.07 22.8
 -2 13 -12 272.27 21.1
 -3 13 -12 71.09 7.2
 -3 13 -12 90.99 8.9
 -4 13 -12 1.3 3.9
 -4 13 -12 4.5 2.5
 -5 13 -12 10.2 4.7
 -5 13 -12 9.3 3
 -5 13 -12 9.7 2.8
 -6 13 -12 17.9 3.5
 -6 13 -12 21.1 3.4
 -7 13 -12 1.1 1.9
 -7 13 -12 2.3 2.1
 -8 13 -12 6.2 2.1
 3 12 -12 8.4 2.8
 2 12 -12 48.2 6
 2 12 -12 48.8 6.6
 2 12 -12 34.2 4.9
 1 12 -12 5.3 3.2
 1 12 -12 0.1 2.2
 1 12 -12 1.1 3
 0 12 -12 22.3 4.7
 0 12 -12 19.6 4.6
 0 12 -12 16.7 3.5
 -1 12 -12 6.7 2.7
 -1 12 -12 7.7 3.8
 -2 12 -12 40.3 6.3
 -2 12 -12 32.7 4.6
 -2 12 -12 30.6 4.4
 -3 12 -12 13.9 3.5
 -3 12 -12 11.6 5.1
 -3 12 -12 15.3 4.6
 -4 12 -12 1.4 2.3
 -4 12 -12 6 4.6
 -4 12 -12 4.3 2.9
 -4 12 -12 3.5 2.5
 -5 12 -12 11.5 2.7
 -5 12 -12 19 6
 -5 12 -12 12.7 3.1
 -5 12 -12 16.3 3.6
 -6 12 -12 8.7 2.5
 -6 12 -12 9.2 3
 -6 12 -12 11.8 5.2
 -6 12 -12 8.6 3.1
 -7 12 -12 -1.7 2.2
 -7 12 -12 0.5 2.4
 -8 12 -12 -2.7 1.9
 -9 12 -12 21.9 3.2
 4 11 -12 1.2 2.5
 3 11 -12 42.4 5.4
 3 11 -12 47.1 6.2
 2 11 -12 6.8 3.3
 2 11 -12 13.1 3.9
 2 11 -12 12.4 3.2
 1 11 -12 60.99 6.9
 1 11 -12 64.19 7.6
 1 11 -12 72.39 7.9
 0 11 -12 60.49 8
 0 11 -12 64.29 7.7
 0 11 -12 65.09 6.9
 -1 11 -12 42.5 5.3
 -1 11 -12 38.6 6.5
 -2 11 -12 185.88 16.9
 -2 11 -12 181.48 14
 -2 11 -12 195.58 15.7
 -2 11 -12 151.98 13.8
 -3 11 -12 4.1 4.4
 -3 11 -12 -0.7 3.4
 -3 11 -12 6.4 2.6
 -3 11 -12 2.9 2.5
 -3 11 -12 4.1 2.8
 -4 11 -12 71.39 11.7
 -4 11 -12 51.79 6.9
 -4 11 -12 62.99 6
 -4 11 -12 72.89 10.3
 -4 11 -12 75.49 7.1
 -5 11 -12 108.99 14.8
 -5 11 -12 133.89 10.7
 -5 11 -12 124.69 13.6
 -5 11 -12 123.79 9.5
 -5 11 -12 110.19 10.4
 -6 11 -12 38 5
 -6 11 -12 33.2 5
 -6 11 -12 31.7 4
 -6 11 -12 25.9 6.8
 -6 11 -12 27.4 7.8
 -7 11 -12 40.8 5.1
 -7 11 -12 32 4.1
 -7 11 -12 39.5 5
 -7 11 -12 25 7.2
 -8 11 -12 11.1 3.1
 -9 11 -12 31.3 4.3
 -10 11 -12 1.1 2.8
 5 10 -12 8.7 2.9
 4 10 -12 16.6 3.8
 4 10 -12 16.5 3.5
 3 10 -12 0.9 2.8
 3 10 -12 -1.6 2.5
 2 10 -12 62.19 8.3
 2 10 -12 70.99 7.4
 2 10 -12 73.79 8
 1 10 -12 155.88 13.3
 1 10 -12 155.68 13.1
 1 10 -12 151.78 12.8
 0 10 -12 22.3 4.7
 0 10 -12 12.2 3.4
 0 10 -12 17.3 4.2
 -1 10 -12 27 4.3
 -1 10 -12 28.4 4.7
 -1 10 -12 39.6 6.4
 -2 10 -12 11.7 5.6
 -2 10 -12 32.8 5.9
 -2 10 -12 15.1 3.6
 -2 10 -12 28 4.3
 -2 10 -12 24.7 4.2
 -3 10 -12 9.9 4.1
 -3 10 -12 14.1 2.7
 -3 10 -12 22.3 3.9
 -3 10 -12 27.4 6.7
 -3 10 -12 18.5 3.5
 -3 10 -12 13 3.4
 -4 10 -12 41.1 5.4
 -4 10 -12 49.8 8.8
 -4 10 -12 48.2 5.9
 -4 10 -12 40 4.7
 -4 10 -12 40 9.3
 -5 10 -12 5.1 2.8
 -5 10 -12 2.2 4.2
 -5 10 -12 3.9 2.8
 -5 10 -12 6.8 5.1
 -5 10 -12 5.5 2.1
 -6 10 -12 37.1 8.1
 -6 10 -12 56.39 6.7
 -6 10 -12 52.79 6.5
 -6 10 -12 73.99 10.9
 -6 10 -12 50.69 5.6
 -7 10 -12 0.2 2.1
 -7 10 -12 2 2.4
 -7 10 -12 -0.4 3.7
 -7 10 -12 1.5 2.6
 -8 10 -12 13 3.4
 -9 10 -12 24.2 4.1
 -9 10 -12 25.3 4
 -10 10 -12 52.49 5.3
 -10 10 -12 55.79 5.5
 6 9 -12 32.8 4.5
 5 9 -12 6.1 3
 -5 -9 12 3.3 3.7
 4 9 -12 31.9 5.5
 4 9 -12 31.9 4.8
 3 9 -12 51.09 7
 3 9 -12 43.4 5.9
 2 9 -12 25 4.5
 2 9 -12 27.4 5
 1 9 -12 2.1 2.6
 1 9 -12 -0.6 2.8
 1 9 -12 -0.6 2.7
 0 9 -12 81.89 8.7
 0 9 -12 81.39 8.2
 0 9 -12 97.79 9.4
 -1 9 -12 333.77 25.9
 -1 9 -12 288.07 24
 -1 9 -12 323.57 28.1
 -1 9 -12 321.87 23.1
 -2 9 -12 2.9 2.1
 -2 9 -12 4.6 2.4
 -2 9 -12 5.6 4.5
 -2 9 -12 4.3 2.6
 -2 9 -12 0.2 2.3
 -2 9 -12 3.8 4.4
 -2 9 -12 0.9 3.2
 -3 9 -12 90.09 7.8
 -3 9 -12 62.69 8.7
 -3 9 -12 59.99 6.7
 -3 9 -12 103.79 11.3
 -3 9 -12 96.69 7.8
 -3 9 -12 72.39 7.2
 -4 9 -12 -0.5 1.8
 -4 9 -12 8.4 5
 -4 9 -12 3.9 2.5
 -4 9 -12 4.7 4.8
 -5 9 -12 69.09 10.6
 -5 9 -12 89.09 8.7
 -5 9 -12 108.99 7.9
 -5 9 -12 85.79 8.4
 -6 9 -12 140.19 15.1
 -6 9 -12 150.08 12.6
 -6 9 -12 166.88 12
 -6 9 -12 160.38 13
 -7 9 -12 31.3 4.1
 -7 9 -12 23.5 7.2
 -7 9 -12 32.3 4.9
 -7 9 -12 33.1 4.6
 -7 9 -12 33 5.1
 -8 9 -12 10.8 3.4
 -8 9 -12 17.7 3.9
 -9 9 -12 7.8 3
 -9 9 -12 12.8 3.5
 -10 9 -12 6.9 2.8
 7 8 -12 15 2.9
 6 8 -12 8 3.1
 -6 -8 12 10 4.4
 5 8 -12 59.19 7.3
 5 8 -12 52.19 6.2
 4 8 -12 16.5 4.3
 4 8 -12 16.2 3.8
 3 8 -12 11 3.4
 3 8 -12 14.3 4.1
 2 8 -12 12.3 3.6
 2 8 -12 10.5 3.3
 -2 -8 12 7.8 3.8
 1 8 -12 2.7 2.7
 1 8 -12 0.5 2.3
 0 8 -12 -2.4 2.7
 0 8 -12 2.6 2.4
 0 8 -12 3.6 4.1
 -1 8 -12 -0.6 3.4
 -1 8 -12 1.2 3.1
 -1 8 -12 2.9 2.4
 -1 8 -12 5.5 2.2
 -1 8 -12 0.2 1.9
 -1 8 -12 3.8 4.1
 -2 8 -12 26.2 6.8
 -2 8 -12 14.3 2.8
 -2 8 -12 9.6 2.8
 -2 8 -12 6 4.4
 -2 8 -12 13.6 4
 -2 8 -12 10.4 2.8
 -3 8 -12 149.39 11.7
 -3 8 -12 142.39 12
 -3 8 -12 138.69 15.8
 -3 8 -12 155.28 11.8
 -3 8 -12 165.08 14.7
 -3 8 -12 143.99 11.3
 -3 8 -12 142.99 12.7
 -4 8 -12 184.78 16.7
 -4 8 -12 196.28 14
 -4 8 -12 166.18 13.4
 -4 8 -12 166.88 13.7
 -4 8 -12 190.38 14.4
 -5 8 -12 129.69 14.5
 -5 8 -12 104.09 9.7
 -5 8 -12 99.29 9.1
 -5 8 -12 104.79 8.7
 -5 8 -12 89.49 11.5
 -6 8 -12 11.5 2.7
 -6 8 -12 7 3.1
 -6 8 -12 6.7 3.2
 -6 8 -12 6.8 2.7
 -7 8 -12 4.5 2.3
 -7 8 -12 6.9 3.2
 -7 8 -12 5.2 2.9
 -7 8 -12 0.3 3.8
 -8 8 -12 26.3 4.9
 -8 8 -12 25.3 4.6
 -8 8 -12 56.59 13.4
 -8 8 -12 34.7 4.5
 -9 8 -12 5.7 3.1
 -10 8 -12 29 4.5
 7 7 -12 0.9 2.5
 -7 -7 12 10.1 4.6
 6 7 -12 17.7 4
 -6 -7 12 3.4 4
 5 7 -12 61.19 6.6
 5 7 -12 52.49 7.3
 4 7 -12 41 6.3
 4 7 -12 53.29 6.1
 3 7 -12 92.29 8.3
 3 7 -12 85.69 8.9
 -3 -7 12 78.59 8.8
 2 7 -12 223.68 18.4
 2 7 -12 237.88 18.3
 -2 -7 12 264.17 18.3
 1 7 -12 25.6 4.5
 1 7 -12 22.6 4
 0 7 -12 288.97 21.9
 0 7 -12 305.17 22.7
 0 7 -12 352.56 27.1
 -1 7 -12 136.39 11.6
 -1 7 -12 157.78 13
 -1 7 -12 159.18 15.8
 -1 7 -12 150.28 11.5
 -1 7 -12 155.08 12
 -1 7 -12 159.48 12.1
 -2 7 -12 75.79 7.9
 -2 7 -12 77.19 6.6
 -2 7 -12 80.79 7.2
 -2 7 -12 84.19 9.5
 -2 7 -12 72.99 7.2
 -2 7 -12 67.59 10.1
 -2 7 -12 75.69 6.9
 -3 7 -12 139.09 13.9
 -3 7 -12 115.89 9.2
 -3 7 -12 103.89 9.7
 -3 7 -12 100.89 11.5
 -3 7 -12 105.99 9.2
 -4 7 -12 155.38 11.7
 -4 7 -12 144.69 14.1
 -4 7 -12 160.98 16
 -4 7 -12 150.38 11.5
 -4 7 -12 132.09 12
 -5 7 -12 2.7 2.2
 -5 7 -12 3.5 2.5
 -5 7 -12 1.5 2.5
 -5 7 -12 11.7 5.4
 -5 7 -12 0.5 1.9
 -6 7 -12 7.3 2.4
 -6 7 -12 0.1 3.7
 -6 7 -12 14.4 3
 -6 7 -12 9.9 3.1
 -6 7 -12 9.7 3.3
 -7 7 -12 2.5 2.9
 -7 7 -12 1 1.9
 -7 7 -12 1.3 2.5
 -7 7 -12 1.9 3.9
 -8 7 -12 4.8 2.4
 -8 7 -12 10.3 6.1
 -8 7 -12 5.8 3.2
 -8 7 -12 5 2.9
 -9 7 -12 96.79 9.5
 -10 7 -12 117.19 10.3
 -11 7 -12 3.4 2.2
 8 6 -12 84.59 7.6
 7 6 -12 32.1 4.9
 -7 -6 12 20.6 6.1
 6 6 -12 100.29 9.5
 6 6 -12 102.09 8.5
 -6 -6 12 69.19 11.6
 5 6 -12 16.3 3.7
 5 6 -12 20.4 4.6
 4 6 -12 3.7 3
 4 6 -12 2.6 2.3
 -4 -6 12 7.7 3.5
 3 6 -12 107.19 9.6
 3 6 -12 111.69 10.2
 -3 -6 12 115.59 10.1
 2 6 -12 43.8 6
 2 6 -12 50.29 6.1
 -2 -6 12 54.39 5.8
 1 6 -12 769.72 52.19
 1 6 -12 830.42 52.99
 1 6 -12 749.13 52.99
 -1 -6 12 758.42 52.49
 0 6 -12 65.19 6
 0 6 -12 84.59 10
 0 6 -12 58.89 6.6
 -1 6 -12 34.2 3.9
 -1 6 -12 34.7 7
 -1 6 -12 42 4.9
 -2 6 -12 49.7 6.1
 -2 6 -12 59.59 8.6
 -2 6 -12 45.3 4.8
 -2 6 -12 38.4 7
 -2 6 -12 40.3 5.3
 -3 6 -12 46.4 7.3
 -3 6 -12 70.39 5.6
 -3 6 -12 45.6 5.2
 -3 6 -12 47.7 5.9
 -4 6 -12 1.7 1.9
 -4 6 -12 -0.7 1.7
 -4 6 -12 3.2 3.8
 -4 6 -12 2.3 2.3
 -5 6 -12 12.2 3.4
 -5 6 -12 12.9 2.9
 -5 6 -12 20 3.2
 -5 6 -12 17.2 3.4
 -6 6 -12 39 4.9
 -6 6 -12 45.9 6.1
 -6 6 -12 37.2 5
 -6 6 -12 49.1 5.6
 -7 6 -12 23.6 3.7
 -7 6 -12 25.9 4.8
 -7 6 -12 25.4 7.4
 -7 6 -12 27.3 4.2
 -8 6 -12 0.6 2
 -8 6 -12 1.1 4.8
 -8 6 -12 -0.1 2.6
 -9 6 -12 1.7 2.9
 -10 6 -12 15.6 3.9
 -11 6 -12 17.2 3.2
 8 5 -12 38.3 5.1
 -8 -5 12 29.3 6.4
 7 5 -12 19 4.3
 -7 -5 12 10.4 5.4
 6 5 -12 33.9 5.6
 6 5 -12 33.8 4.7
 -6 -5 12 23.7 7.4
 5 5 -12 6.6 3.4
 5 5 -12 9 2.9
 -5 -5 12 3.6 3.4
 4 5 -12 153.48 12.9
 4 5 -12 147.19 12.3
 -4 -5 12 163.98 13.1
 3 5 -12 1.9 2.1
 3 5 -12 0.2 2.3
 -3 -5 12 0.6 2.2
 2 5 -12 -0.7 2.3
 2 5 -12 1.9 1.6
 2 5 -12 0.8 1.8
 -2 -5 12 1 2
 -1 -5 12 151.58 11.5
 0 5 -12 143.29 14.1
 -1 5 -12 75.19 9.7
 -2 5 -12 890.21 59.29
 -3 5 -12 56.79 4.7
 -3 5 -12 64.69 5.7
 -4 5 -12 216.08 17.8
 -4 5 -12 233.58 15.8
 -4 5 -12 188.78 15.1
 -4 5 -12 224.08 16.1
 -4 5 -12 231.68 15.9
 -5 5 -12 1 1.5
 -5 5 -12 0.2 2
 -5 5 -12 -0.3 2.2
 -5 5 -12 0.4 2
 -6 5 -12 284.27 21.8
 -6 5 -12 303.07 21.8
 -6 5 -12 337.77 23.1
 -6 5 -12 311.37 22.4
 -7 5 -12 30.2 5.1
 -7 5 -12 27.7 3.9
 -8 5 -12 34.1 11.1
 -8 5 -12 42.2 6.1
 -9 5 -12 71.29 7.9
 -10 5 -12 5 2.8
 -11 5 -12 24.1 3.6
 9 4 -12 55.29 5.8
 8 4 -12 23 4.5
 -8 -4 12 39.3 7.7
 -7 -4 12 84.59 12.1
 6 4 -12 5.1 3.1
 -6 -4 12 7 4.8
 5 4 -12 118.89 10.7
 5 4 -12 131.09 11.6
 -5 -4 12 136.59 11.7
 -5 -4 12 142.99 15.6
 4 4 -12 77.89 8.2
 4 4 -12 74.09 7.5
 -4 -4 12 92.29 8.2
 3 4 -12 105.19 8.7
 3 4 -12 99.19 7.8
 -3 -4 12 88.89 8.6
 -2 -4 12 120.39 9.8
 1 4 -12 196.28 13.8
 -1 -4 12 212.38 14.9
 0 4 -12 0.9 3
 0 -4 12 1.5 1.3
 -1 4 -12 2 1.2
 -2 4 -12 3 1.3
 -3 4 -12 61.29 5.3
 -4 4 -12 95.09 8.2
 -4 4 -12 124.39 8.9
 -5 4 -12 45 4.8
 -5 4 -12 37.4 4.3
 -6 4 -12 6.2 2.9
 -6 4 -12 2 2.2
 -6 4 -12 5.9 2.3
 -7 4 -12 1.9 2.9
 -7 4 -12 8.4 3.1
 -8 4 -12 -0.4 2.6
 -9 4 -12 119.29 10.7
 -10 4 -12 66.69 6.9
 9 3 -12 9.4 3
 -9 -3 12 8.7 4.1
 8 3 -12 56.79 6.5
 -8 -3 12 44.3 8.9
 7 3 -12 36.8 5.5
 -7 -3 12 22.4 7
 6 3 -12 59.99 7.8
 -6 -3 12 71.29 10.9
 -6 -3 12 60.79 7.7
 -5 -3 12 245.78 19.4
 -5 -3 12 264.67 23.4
 4 3 -12 300.97 20.6
 4 3 -12 262.87 21
 -4 -3 12 318.17 21.7
 3 3 -12 84.69 6.9
 3 3 -12 82.49 6.3
 -3 -3 12 88.29 7.9
 2 3 -12 430.86 29.6
 -2 -3 12 455.65 30.7
 -1 -3 12 720.53 48.7
 0 3 -12 1.6 1.4
 0 -3 12 2.1 1.5
 -1 3 -12 153.38 10.6
 1 -3 12 132.99 10.5
 -2 3 -12 427.56 29.2
 -3 3 -12 32.8 3.6
 -3 3 -12 23.5 2.3
 -4 3 -12 3.3 2.4
 -4 3 -12 1.3 1.6
 -5 3 -12 1.3 2.3
 -5 3 -12 1.8 1.7
 -5 3 -12 -0.8 2
 -6 3 -12 -0.1 2.2
 -6 3 -12 0 1.8
 -7 3 -12 60.69 6.9
 -8 3 -12 15.1 3.9
 -9 3 -12 -0.5 2.3
 -10 3 -12 8.1 2.8
 9 2 -12 7.1 2.8
 -9 -2 12 2.2 3.4
 8 2 -12 6.1 3
 -8 -2 12 4.3 4.3
 7 2 -12 2.4 3.2
 -7 -2 12 1.1 4.1
 -6 -2 12 72.09 10.8
 -6 -2 12 72.69 8
 -5 -2 12 7.5 3
 -5 -2 12 5.4 4.1
 4 2 -12 187.48 13.3
 4 2 -12 201.28 13.9
 -4 -2 12 184.78 17.4
 -4 -2 12 186.68 14.7
 3 2 -12 356.76 24.2
 -3 -2 12 359.06 25.4
 -2 -2 12 21 3.4
 -1 -2 12 160.58 12
 0 2 -12 163.58 11.7
 0 -2 12 151.18 11.6
 -1 2 -12 49.7 4.5
 1 -2 12 45.1 4.5
 -2 2 -12 1009.8 63.69
 2 -2 12 885.21 63.39
 -3 2 -12 20.1 3.3
 3 -2 12 23.5 3.3
 -4 2 -12 471.45 32
 -4 2 -12 461.35 32.3
 4 -2 12 444.66 32
 -5 2 -12 48.5 5.4
 -5 2 -12 44.2 5.6
 5 -2 12 52.69 6
 -6 2 -12 28.8 4.6
 -6 2 -12 23.6 4.3
 6 -2 12 31.7 4.9
 -7 2 -12 126.59 11.3
 7 -2 12 137.69 11.8
 -8 2 -12 180.58 14.6
 -9 2 -12 6.8 2.9
 -10 2 -12 82.49 7.4
 9 1 -12 102.39 8.4
 -9 -1 12 65.79 10.3
 8 1 -12 12 3.9
 -8 -1 12 5.8 4.5
 -7 -1 12 51.09 6.8
 -7 -1 12 43.2 9.3
 -6 -1 12 36 7.8
 -6 -1 12 46 6.2
 5 1 -12 2.2 1.9
 5 1 -12 6.1 1.7
 -5 -1 12 5.8 4.1
 -5 -1 12 0 2.4
 4 1 -12 0.5 1.6
 4 1 -12 1.7 1.3
 -4 -1 12 2 3.1
 -4 -1 12 2.7 2.3
 -3 -1 12 46.5 5.6
 -3 -1 12 64.99 8
 -2 -1 12 59.09 5.8
 1 1 -12 65.39 5.7
 -1 -1 12 53.19 5.5
 0 1 -12 2.5 1.5
 0 -1 12 5.9 1.8
 -1 1 -12 16.2 2.7
 1 -1 12 15.4 2.7
 -2 1 -12 0.2 1.5
 2 -1 12 1.2 1.6
 -3 1 -12 111.19 9.3
 3 -1 12 108.29 9.1
 -4 1 -12 141.49 10.9
 -4 1 -12 122.19 10.6
 -4 1 -12 119.09 10.2
 4 -1 12 134.99 10.9
 -5 1 -12 150.98 11.4
 -5 1 -12 119.09 11
 -5 1 -12 123.99 10
 5 -1 12 146.69 11.6
 -6 1 -12 48.7 5
 -6 1 -12 55.29 6.3
 6 -1 12 47.4 6.5
 -7 1 -12 32.5 5
 -7 1 -12 29.5 3.8
 7 -1 12 32.5 5.8
 -8 1 -12 396.26 28.6
 -9 1 -12 9.9 3.2
 -10 1 -12 36.7 5.2
 -10 0 12 -0.5 2.9
 -10 0 12 0.3 1.9
 9 0 -12 216.88 17.1
 -9 0 12 226.88 16.3
 -9 0 12 230.58 20.6
 -8 0 12 59.49 9.7
 -7 0 12 500.95 37.9
 -7 0 12 567.54 42
 6 0 -12 67.39 6.5
 -6 0 12 71.19 10.4
 -6 0 12 66.19 7.4
 5 0 -12 0.6 1.8
 -5 0 12 0.3 3.2
 -5 0 12 2.3 2.3
 4 0 -12 617.64 43.4
 4 0 -12 648.54 43.9
 -4 0 12 663.33 47.4
 -4 0 12 660.73 44.6
 -3 0 12 872.71 56.59
 -3 0 12 793.82 58.69
 -2 0 12 37.3 4.4
 1 0 -12 244.18 18.1
 -1 0 12 259.87 18.1
 0 0 -12 411.66 28.8
 0 0 12 419.26 28.8
 -1 0 -12 358.16 24.9
 1 0 12 346.27 24.7
 -2 0 -12 56.29 5.8
 2 0 12 63.09 6
 -3 0 -12 386.86 27.8
 3 0 12 394.76 27.7
 -4 0 -12 1302.97 90.49
 -4 0 -12 1371.46 89.59
 -4 0 -12 1311.07 90.79
 4 0 12 1401.86 90.79
 -5 0 -12 11.4 2.7
 -5 0 -12 17.1 3.7
 5 0 12 14.4 3.8
 -6 0 -12 565.64 38.6
 -6 0 -12 566.54 39.6
 6 0 12 560.54 39.9
 -7 0 -12 1.1 2.5
 -7 0 -12 0.6 2.2
 -8 0 -12 31.7 5
 -8 0 -12 36 4.2
 -9 0 -12 5.8 2.8
 -10 1 12 2.7 3.3
 -10 1 12 3.9 1.9
 -9 1 12 1.6 3.5
 -9 1 12 3.2 2.1
 -8 1 12 13.1 2.8
 -8 1 12 11 5.1
 -7 1 12 15.5 4.1
 -7 1 12 21 6.3
 6 -1 -12 450.55 30.3
 -6 1 12 443.16 34.5
 -6 1 12 410.56 31.1
 5 -1 -12 454.65 31.2
 -5 1 12 447.06 35
 4 -1 -12 599.94 40.9
 -4 1 12 600.54 44.3
 -4 1 12 603.74 41.7
 -3 1 12 302.07 21.7
 -3 1 12 298.07 23.8
 -2 1 12 1053.59 70.99
 1 -1 -12 161.08 13
 -1 1 12 185.58 13.2
 0 -1 -12 767.82 53.59
 0 1 12 812.42 53.59
 -1 -1 -12 31.9 4.3
 1 1 12 40.8 4.7
 -2 -1 -12 187.88 14.6
 2 1 12 193.28 14.7
 -3 -1 -12 288.47 22.2
 -3 -1 -12 300.57 21.4
 3 1 12 326.57 22.4
 -4 -1 -12 287.27 20
 -4 -1 -12 285.37 20.8
 4 1 12 266.07 20.9
 -5 -1 -12 58.39 6.9
 -5 -1 -12 59.49 6.3
 5 1 12 73.39 7.6
 -6 -1 -12 9.2 3
 -6 -1 -12 10.6 3.5
 6 1 12 10.9 3.7
 -7 -1 -12 1 2.2
 -7 -1 -12 5.2 3
 -8 -1 -12 209.88 15.7
 -8 -1 -12 223.28 16.7
 -11 2 12 3.9 2.4
 -10 2 12 2.5 3.3
 -10 2 12 0.8 1.7
 -9 2 12 189.98 13.4
 -9 2 12 167.48 17
 -8 2 12 79.29 10.8
 -8 2 12 79.09 7.2
 7 -2 -12 66.39 6.4
 -7 2 12 56.79 6.1
 -7 2 12 61.29 7.5
 -7 2 12 67.89 10
 6 -2 -12 68.79 7.4
 -6 2 12 81.39 8.4
 -6 2 12 102.79 11.7
 5 -2 -12 777.72 54.89
 -5 2 12 834.32 58.89
 -5 2 12 827.92 55.99
 4 -2 -12 42.2 4.9
 -4 2 12 53.79 7.7
 -4 2 12 43.3 5.6
 -3 2 12 258.17 18.8
 -3 2 12 247.48 20.4
 -2 2 12 68.89 6.7
 -1 2 12 73.29 7
 0 2 12 3.8 2.2
 1 2 12 25.5 4.2
 -2 -2 -12 524.25 37
 2 2 12 560.84 38
 -3 -2 -12 520.95 36.7
 -3 -2 -12 526.35 37.5
 3 2 12 557.44 37.7
 -4 -2 -12 293.57 22.5
 -4 -2 -12 322.17 23.3
 4 2 12 333.97 23.6
 -5 -2 -12 144.69 11.4
 -5 -2 -12 117.39 10.3
 5 2 12 113.99 11.2
 -6 -2 -12 169.78 13.9
 -6 -2 -12 161.58 13
 -7 -2 -12 26 3.9
 -7 -2 -12 21.5 4.5
 -8 -2 -12 1.5 2.2
 -11 3 12 12.1 2.3
 -10 3 12 9 2.2
 -10 3 12 5.1 3.7
 -9 3 12 106.99 12.8
 -9 3 12 121.39 9.3
 -8 3 12 -1.5 1.6
 -8 3 12 -0.6 3.2
 7 -3 -12 165.78 12.6
 -7 3 12 163.88 12.4
 -7 3 12 159.08 16.4
 -7 3 12 157.58 13.8
 6 -3 -12 2.2 2
 -6 3 12 -0.5 2.4
 -6 3 12 2.8 3.5
 -6 3 12 2.4 1.7
 5 -3 -12 6.8 2.3
 -5 3 12 9 3.2
 -5 3 12 6.7 4
 4 -3 -12 203.68 15.3
 4 -3 -12 198.88 16.2
 -4 3 12 211.18 18.1
 -4 3 12 217.88 16.2
 -3 3 12 9.6 3.8
 -3 3 12 9.6 2.9
 -2 3 12 53.39 6.1
 -1 3 12 66.99 6.8
 0 3 12 119.69 10.3
 -1 -3 -12 15.5 2.9
 1 3 12 13.7 3.2
 -2 -3 -12 172.48 14.2
 -2 -3 -12 166.08 13.3
 2 3 12 188.18 14.3
 -3 -3 -12 44.4 5.4
 -3 -3 -12 55.39 6.9
 3 3 12 53.99 6.4
 -4 -3 -12 37 5.1
 -4 -3 -12 56.49 6.7
 4 3 12 48.5 6.5
 -5 -3 -12 31 4.5
 -5 -3 -12 30.8 5.5
 5 3 12 31.2 5.5
 -6 -3 -12 14.1 3.3
 -7 -3 -12 12.1 3.1
 -8 -3 -12 125.59 9.7
 -11 4 12 21.5 2.8
 -10 4 12 10 4.5
 -10 4 12 10 2.3
 -9 4 12 3.1 2
 -9 4 12 1.1 3.6
 8 -4 -12 386.16 27
 -8 4 12 374.16 31
 -8 4 12 385.06 26.8
 7 -4 -12 212.48 17.3
 -7 4 12 234.48 17.2
 -7 4 12 255.27 21.5
 6 -4 -12 144.69 11.2
 6 -4 -12 130.49 11.6
 -6 4 12 134.59 14.3
 -6 4 12 151.88 11.2
 5 -4 -12 529.05 38.3
 5 -4 -12 536.75 38.8
 -5 4 12 566.24 41.6
 -5 4 12 597.94 39.5
 4 -4 -12 219.08 17.7
 4 -4 -12 242.08 18.3
 -4 4 12 262.37 20.6
 -4 4 12 255.47 18.8
 3 -4 -12 68.19 6.5
 3 -4 -12 69.19 6.7
 -3 4 12 66.29 7.2
 2 -4 -12 46.9 5.5
 2 -4 -12 59.39 5.7
 -2 4 12 40.1 5.5
 1 -4 -12 385.76 26.9
 -1 4 12 383.66 27.7
 0 -4 -12 20.2 3.4
 0 4 12 17.1 3.6
 -1 -4 -12 2.3 3.2
 -1 -4 -12 4.3 2.3
 1 4 12 2.5 2.5
 -2 -4 -12 111.69 10.7
 -2 -4 -12 118.79 9.8
 2 4 12 112.19 10.4
 -3 -4 -12 -0.3 2.1
 -3 -4 -12 -1 2.7
 3 4 12 -2.3 2.6
 -4 -4 -12 97.89 8.9
 -4 -4 -12 101.59 10.1
 4 4 12 98.99 9.8
 -5 -4 -12 15.3 3.4
 -6 -4 -12 97.79 8.6
 -7 -4 -12 10.7 2.7
 -8 -4 -12 19.4 2.8
 -11 5 12 12.7 2.3
 -10 5 12 24.6 5.8
 -10 5 12 24.5 3.2
 -10 5 12 14.1 3.5
 -9 5 12 260.87 19
 -9 5 12 265.77 22.8
 8 -5 -12 8.3 2.9
 -8 5 12 6.8 2.1
 -8 5 12 10.6 4.9
 7 -5 -12 14.6 3.1
 7 -5 -12 17.1 3.8
 -7 5 12 15.2 5.8
 -7 5 12 18 3.3
 6 -5 -12 24.5 3.7
 6 -5 -12 15.5 3.8
 -6 5 12 11.9 5.2
 -6 5 12 28.5 3.8
 5 -5 -12 436.36 30.3
 5 -5 -12 435.66 30.9
 -5 5 12 427.46 33.5
 -5 5 12 434.36 31.4
 4 -5 -12 45.5 5.2
 4 -5 -12 41.2 5.5
 -4 5 12 46 6.5
 -4 5 12 50.39 7.6
 3 -5 -12 6.5 2.4
 3 -5 -12 9.5 2.8
 -3 5 12 6.4 3
 2 -5 -12 69.19 7
 2 -5 -12 78.49 7.4
 -2 5 12 79.09 7.9
 1 -5 -12 61.89 6.7
 1 -5 -12 63.49 8.4
 -1 5 12 70.79 7.2
 0 -5 -12 2.2 3.4
 0 -5 -12 2.7 2.3
 0 5 12 3.7 2.7
 -1 -5 -12 24 5.4
 -1 -5 -12 15.9 3.4
 1 5 12 14.6 3.9
 -2 -5 -12 53.79 7.4
 -2 -5 -12 39.9 5.2
 2 5 12 41.4 5.9
 -3 -5 -12 364.46 26
 -3 -5 -12 397.46 29.4
 3 5 12 338.47 26.7
 -4 -5 -12 127.39 10.8
 -5 -5 -12 35.1 4.9
 -6 -5 -12 94.59 7.8
 6 5 12 79.49 7
 -7 -5 -12 44.6 4.8
 -11 6 12 73.59 6
 -10 6 12 125.29 13.4
 -10 6 12 137.89 11.5
 -10 6 12 147.09 10.5
 -9 6 12 8.2 4.5
 -9 6 12 9.7 2.5
 -8 6 12 356.46 25.4
 -8 6 12 364.56 29.6
 7 -6 -12 26.6 4.2
 7 -6 -12 36.1 5.9
 -7 6 12 20.9 3.5
 -7 6 12 33.6 7.5
 6 -6 -12 274.37 21.9
 6 -6 -12 284.77 21.4
 -6 6 12 308.87 25
 -6 6 12 303.07 24.2
 5 -6 -12 61.99 6.9
 5 -6 -12 75.19 7.8
 -5 6 12 80.49 9.7
 -5 6 12 61.29 10.4
 4 -6 -12 58.69 6.9
 4 -6 -12 70.39 7.5
 -4 6 12 66.59 8
 -4 6 12 81.29 9.6
 3 -6 -12 12.6 2.8
 3 -6 -12 8.9 3.2
 -3 6 12 9.6 3.5
 2 -6 -12 55.09 6.1
 2 -6 -12 66.09 6.9
 -2 6 12 55.09 5.3
 -2 6 12 61.09 7.1
 1 -6 -12 315.87 23.4
 -1 6 12 337.97 24.2
 -1 6 12 322.17 22.8
 0 -6 -12 10.3 4.5
 0 -6 -12 7.6 2.8
 0 6 12 4.9 3
 -1 -6 -12 6.2 4.4
 -1 -6 -12 3.5 2.6
 1 6 12 4.3 3
 -2 -6 -12 32.2 4.6
 2 6 12 33.2 5.4
 -3 -6 -12 70.49 7.3
 3 6 12 66.19 8.3
 -4 -6 -12 20.9 4
 4 6 12 20.9 3.5
 -5 -6 -12 23.6 3.9
 5 6 12 26.4 3.4
 -6 -6 -12 128.89 9.4
 6 6 12 106.39 8.6
 -7 -6 -12 2.4 1.9
 -10 7 12 40.6 5.3
 -10 7 12 43.2 4.3
 -10 7 12 26.6 6.1
 -9 7 12 427.76 30.6
 -9 7 12 456.85 34.6
 -8 7 12 61.89 6
 -8 7 12 49.5 9.1
 -7 7 12 185.68 19.2
 -7 7 12 216.68 15.9
 -7 7 12 230.48 18.9
 6 -7 -12 160.38 14.1
 -6 7 12 167.68 16.3
 -6 7 12 181.68 17.2
 5 -7 -12 166.88 14.8
 5 -7 -12 188.28 14.3
 -5 7 12 227.28 17.9
 -5 7 12 163.68 17
 4 -7 -12 7.8 3.3
 4 -7 -12 5 2.6
 -4 7 12 2.8 4
 -4 7 12 14 5.2
 3 -7 -12 -0.9 2.6
 3 -7 -12 -0.3 2.2
 -3 7 12 2.3 2.7
 2 -7 -12 146.79 12.5
 2 -7 -12 135.79 11.5
 -2 7 12 139.59 10.6
 -2 7 12 141.69 12.2
 1 -7 -12 9.8 3.1
 -1 7 12 9.5 3.4
 -1 7 12 12.3 2.5
 0 -7 -12 17.2 3.6
 0 7 12 29.4 6.3
 0 7 12 17.5 4.2
 0 7 12 23.6 3.4
 -1 -7 -12 108.59 9.5
 1 7 12 98.29 10.2
 1 7 12 111.89 8.9
 -2 -7 -12 143.59 11.7
 2 7 12 138.49 11
 -3 -7 -12 47.9 5.7
 3 7 12 46.9 5
 -4 -7 -12 6 2.7
 4 7 12 4.1 1.9
 -5 -7 -12 6.9 2.5
 5 7 12 -0.9 1.4
 -6 -7 -12 38.8 4.3
 -10 8 12 108.99 11.4
 -10 8 12 89.19 8.7
 -10 8 12 93.59 7.7
 -9 8 12 179.08 16.3
 -9 8 12 155.98 12.6
 -8 8 12 246.78 18.3
 -8 8 12 253.87 22
 -7 8 12 86.39 11
 -7 8 12 115.29 12.6
 -7 8 12 99.59 8.8
 -6 8 12 -1.8 3.4
 -6 8 12 2.5 3.9
 5 -8 -12 52.09 7.2
 -5 8 12 53.69 9.3
 -5 8 12 72.69 9.7
 4 -8 -12 68.89 7.6
 4 -8 -12 74.29 8.6
 -4 8 12 85.69 11.2
 3 -8 -12 -1.5 2.3
 3 -8 -12 0.5 2.9
 -3 8 12 0.3 4
 2 -8 -12 21.2 4.2
 2 -8 -12 18 4.7
 -2 8 12 17.8 5.8
 -2 8 12 25.1 3.4
 1 -8 -12 9.9 3.4
 -1 8 12 14.3 2.6
 -1 8 12 15.1 5.6
 0 -8 -12 254.67 18.9
 0 8 12 247.58 18
 -1 -8 -12 6.9 2.7
 1 8 12 3.8 2.1
 -2 -8 -12 12.4 3.2
 2 8 12 9.1 2.3
 -3 -8 -12 23.6 4
 3 8 12 25.6 3.4
 -4 -8 -12 32 4.5
 4 8 12 34.3 3.8
 -5 -8 -12 16.6 3
 5 8 12 13.5 2.1
 -10 9 12 11.2 3
 -10 9 12 8.5 1.9
 -9 9 12 7.5 4.4
 -9 9 12 17.8 2.8
 -8 9 12 9.5 2.6
 -8 9 12 1.8 3.8
 -8 9 12 10 4.2
 -7 9 12 -1.4 3.4
 -7 9 12 2.2 2.2
 -7 9 12 4.2 4.1
 -6 9 12 72.49 9.4
 -6 9 12 47 9.2
 -5 9 12 0.7 3.8
 -5 9 12 -0.3 3.7
 -4 9 12 190.48 18
 3 -9 -12 13.6 5.5
 -3 9 12 17.1 2.9
 -3 9 12 14.4 5.5
 2 -9 -12 74.99 7.6
 -2 9 12 70.49 9.7
 -2 9 12 70.19 6.3
 1 -9 -12 566.64 38
 -1 9 12 533.75 40.3
 -1 9 12 536.65 37.2
 0 -9 -12 3.4 2.7
 0 9 12 2.7 2
 -1 -9 -12 13.7 3.7
 1 9 12 14.3 2.7
 -2 -9 -12 136.69 11
 2 9 12 131.69 10.2
 -3 -9 -12 43.9 5
 3 9 12 37.1 4.1
 -4 -9 -12 14.3 3
 4 9 12 14.9 2.3
 -9 10 12 38.4 7.5
 -9 10 12 32.9 3.8
 -8 10 12 234.48 16.1
 -8 10 12 235.78 19.8
 -8 10 12 196.68 17.8
 -7 10 12 25.5 6.6
 -7 10 12 22.4 5.6
 -7 10 12 16.6 3.2
 -6 10 12 18.8 5.9
 -5 10 12 88.79 11
 -4 10 12 541.05 40.5
 -3 10 12 3.5 4
 -3 10 12 0.5 1.8
 -2 10 12 2.2 3.9
 -2 10 12 6.2 2.2
 1 -10 -12 23.8 4.4
 -1 10 12 22.3 5.9
 -1 10 12 21.5 3.4
 0 -10 -12 3 2.5
 0 10 12 2.4 1.8
 -1 -10 -12 12.8 3.2
 1 10 12 12.5 2.5
 -2 -10 -12 10.3 2.8
 2 10 12 7.5 2
 -3 -10 -12 70.39 6.2
 3 10 12 65.59 5.7
 -9 11 12 6.4 2.4
 -9 11 12 4.9 1.5
 -8 11 12 1.3 4.8
 -8 11 12 -1.7 2.9
 -8 11 12 -1 1.6
 -7 11 12 2.4 3.5
 -7 11 12 -0.5 3.7
 -7 11 12 1.8 1.9
 -6 11 12 106.59 12.7
 -6 11 12 152.98 13.3
 -5 11 12 10.3 4.9
 -4 11 12 -0.8 3.5
 -3 11 12 107.59 11.4
 -3 11 12 96.49 8.2
 -2 11 12 23.2 3.4
 -2 11 12 27 6.1
 -1 11 12 251.37 18
 0 -11 -12 19 3.6
 0 11 12 19.2 2.9
 -1 -11 -12 5.6 2.5
 1 11 12 6.5 2
 -2 -11 -12 97.89 7.6
 2 11 12 86.29 7
 -8 12 12 96.79 8.2
 -8 12 12 90.99 9.1
 -8 12 12 113.89 7.5
 -7 12 12 27.7 5.2
 -7 12 12 21.9 2.8
 -6 12 12 56.19 7.8
 -6 12 12 61.59 5.4
 -5 12 12 47.2 7.3
 -4 12 12 0.5 3.2
 -3 12 12 20.5 3.1
 -3 12 12 26 5.4
 -2 12 12 7.6 3.8
 -2 12 12 11 2.4
 -1 12 12 31.3 3.7
 0 12 12 8.9 2.1
 1 12 12 1.4 1.4
 -6 13 12 2.8 1.5
 -6 13 12 4.4 3
 -5 13 12 4.7 3.2
 -4 13 12 24.1 4.7
 -3 13 12 28 4.9
 -3 13 12 35.8 3.5
 -2 13 12 2.8 1.5
 -3 14 -13 4.4 2
 -4 14 -13 26.1 3.5
 -5 14 -13 28.5 3.6
 -6 14 -13 14.4 2.6
 1 13 -13 13.9 2.7
 1 13 -13 14.3 3.6
 0 13 -13 -0.2 2.8
 0 13 -13 1 2
 -1 13 -13 1.3 1.9
 -1 13 -13 0.7 2.9
 -2 13 -13 41.6 5.6
 -2 13 -13 27.1 4
 -3 13 -13 19.3 3.4
 -4 13 -13 5.8 2.5
 -5 13 -13 80.39 7.4
 -6 13 -13 5.2 2.5
 -6 13 -13 5.3 2.4
 -7 13 -13 29 3.8
 -8 13 -13 -0.7 1.7
 3 12 -13 9.7 2.9
 2 12 -13 -1.1 2.7
 2 12 -13 -0.2 2
 1 12 -13 0.3 2.9
 1 12 -13 -0.8 4.5
 1 12 -13 0.6 2.2
 0 12 -13 9.7 3.7
 0 12 -13 9.5 2.7
 -1 12 -13 10.1 4
 -1 12 -13 8 2.7
 -2 12 -13 40.5 6.3
 -2 12 -13 30.2 4.5
 -2 12 -13 45.4 5.1
 -3 12 -13 43.1 6.6
 -3 12 -13 33.7 4.9
 -4 12 -13 10.6 3
 -4 12 -13 9.8 2.5
 -4 12 -13 7.4 2.8
 -5 12 -13 -0.7 2.5
 -5 12 -13 -0.5 2.2
 -5 12 -13 -1.2 1.9
 -6 12 -13 33.9 4.2
 -6 12 -13 25.5 4.2
 -6 12 -13 21.5 3.3
 -7 12 -13 -0.1 2.2
 -7 12 -13 2.2 2.2
 -8 12 -13 6.3 2.3
 -9 12 -13 0.4 1.8
 4 11 -13 5 2.5
 3 11 -13 34.6 4.6
 3 11 -13 38.2 5.3
 2 11 -13 1.6 3
 2 11 -13 2.4 2.4
 1 11 -13 5.5 2.7
 1 11 -13 6.5 4.2
 1 11 -13 6.1 3.5
 0 11 -13 50.49 6.1
 0 11 -13 47.1 6.8
 -1 11 -13 7.6 2.7
 -1 11 -13 8.3 3.9
 -2 11 -13 61.29 6.8
 -2 11 -13 78.99 8.9
 -2 11 -13 65.59 6.9
 -3 11 -13 23.6 4.6
 -3 11 -13 42 6.7
 -3 11 -13 39.3 5.1
 -3 11 -13 45.3 4.5
 -4 11 -13 11.5 6.2
 -4 11 -13 2.9 2.7
 -4 11 -13 6.7 2.2
 -4 11 -13 8.4 5
 -4 11 -13 5.2 2.7
 -5 11 -13 9.1 3.1
 -5 11 -13 10 2.4
 -5 11 -13 2 2.8
 -5 11 -13 18.5 6.8
 -6 11 -13 2.3 2.1
 -6 11 -13 3.5 2.6
 -6 11 -13 6.1 4.8
 -6 11 -13 0.8 2.7
 -7 11 -13 33.9 4.1
 -7 11 -13 28.9 4.5
 -7 11 -13 29.3 4.5
 -7 11 -13 37.7 8.2
 -8 11 -13 -2.1 2
 -9 11 -13 39.2 4.6
 5 10 -13 6.6 2.7
 4 10 -13 95.39 8.9
 4 10 -13 108.99 9.4
 3 10 -13 12.6 3.6
 3 10 -13 8.4 3.1
 2 10 -13 79.59 8.2
 2 10 -13 85.99 8.6
 1 10 -13 54.29 6.5
 1 10 -13 58.99 7
 0 10 -13 85.59 8.2
 0 10 -13 80.09 9.3
 -1 10 -13 207.48 15.9
 -1 10 -13 198.88 17
 -2 10 -13 99.49 8.2
 -2 10 -13 108.99 14.3
 -2 10 -13 93.59 10.6
 -2 10 -13 101.59 9.2
 -2 10 -13 97.29 9.1
 -3 10 -13 9.4 2.9
 -3 10 -13 4.7 5.2
 -3 10 -13 12.7 2.7
 -3 10 -13 17.5 6
 -3 10 -13 10.8 3.2
 -3 10 -13 12.2 3.3
 -3 10 -13 14 4.3
 -4 10 -13 6.1 5.1
 -4 10 -13 7.1 2.9
 -4 10 -13 18.2 7
 -4 10 -13 4.7 2.8
 -5 10 -13 118.39 9.8
 -5 10 -13 136.39 11.1
 -5 10 -13 136.59 11
 -5 10 -13 117.79 15.1
 -6 10 -13 42.5 5.5
 -6 10 -13 48.1 5.7
 -6 10 -13 31.1 4.3
 -7 10 -13 24.7 3.7
 -7 10 -13 23.2 4.3
 -8 10 -13 35.5 5.2
 -8 10 -13 47 8.6
 -9 10 -13 42.6 5
 -9 10 -13 42.1 5
 6 9 -13 14.8 3
 5 9 -13 -0.4 2.4
 -5 -9 13 3.9 3.7
 4 9 -13 24.9 4.9
 4 9 -13 32.2 4.6
 3 9 -13 8.7 3.7
 3 9 -13 11.9 3.3
 2 9 -13 26.9 4.7
 2 9 -13 28.7 5.1
 1 9 -13 68.79 7.5
 1 9 -13 68.59 7.9
 0 9 -13 237.98 21.2
 0 9 -13 263.57 19.2
 -1 9 -13 4 4.8
 -1 9 -13 -0.8 3.4
 -1 9 -13 4.7 2.6
 -1 9 -13 1.5 2.1
 -2 9 -13 27.3 5.6
 -2 9 -13 37.9 4.9
 -2 9 -13 27.6 4.1
 -2 9 -13 42.8 5.1
 -2 9 -13 35.3 4.7
 -3 9 -13 17.9 3.5
 -3 9 -13 13.6 3.1
 -3 9 -13 14.5 4.4
 -3 9 -13 12.7 5.5
 -3 9 -13 18.8 6.7
 -3 9 -13 17.2 3.4
 -3 9 -13 17 3.6
 -4 9 -13 32.9 4.3
 -4 9 -13 36.8 5
 -4 9 -13 40.5 5.2
 -4 9 -13 40.5 8.1
 -4 9 -13 31.1 4.5
 -5 9 -13 40.9 5.8
 -5 9 -13 55.79 6.1
 -5 9 -13 37.5 4.8
 -6 9 -13 67.29 7.5
 -6 9 -13 64.59 6.2
 -6 9 -13 70.59 7.1
 -6 9 -13 64.09 10.9
 -7 9 -13 35.4 8.4
 -7 9 -13 58.79 6.6
 -7 9 -13 61.09 5.7
 -8 9 -13 113.49 9.3
 -8 9 -13 84.59 8.7
 -8 9 -13 91.49 11.6
 -9 9 -13 9.7 2.8
 -9 9 -13 9.6 3.1
 -10 9 -13 23.4 3.7
 6 8 -13 29.4 4.4
 -6 -8 13 17.8 5.3
 5 8 -13 1 2.3
 5 8 -13 1 3
 -5 -8 13 1.8 4
 4 8 -13 117.09 11.1
 4 8 -13 120.49 10.5
 3 8 -13 2 2.4
 3 8 -13 2.2 2.9
 2 8 -13 11.1 3.4
 2 8 -13 8.2 3.3
 1 8 -13 117.39 10.8
 1 8 -13 119.89 10.5
 0 8 -13 52.89 6.3
 0 8 -13 65.99 10.5
 0 8 -13 46.5 5.9
 -1 8 -13 248.38 20.3
 -1 8 -13 210.08 21.9
 -1 8 -13 265.67 18.2
 -1 8 -13 241.48 17.3
 -2 8 -13 0.5 2.2
 -2 8 -13 0.6 1.8
 -2 8 -13 0 1.9
 -2 8 -13 0 2.9
 -2 8 -13 1.8 4.1
 -2 8 -13 -0.7 2.2
 -3 8 -13 565.54 39.3
 -3 8 -13 585.54 39.8
 -3 8 -13 574.04 39.9
 -3 8 -13 562.44 44.6
 -3 8 -13 583.84 39.6
 -4 8 -13 0.1 2
 -4 8 -13 -0.1 4
 -4 8 -13 -3.2 2.4
 -4 8 -13 -0.5 2.1
 -4 8 -13 -0.6 2.2
 -5 8 -13 4.3 4.8
 -5 8 -13 1.1 2.6
 -5 8 -13 1.7 2.1
 -5 8 -13 4.4 2.5
 -6 8 -13 3.2 2.6
 -6 8 -13 2.4 2.1
 -6 8 -13 1.7 2.4
 -6 8 -13 2 3.1
 -6 8 -13 5.5 5
 -7 8 -13 0.6 2.5
 -7 8 -13 1.2 2.1
 -7 8 -13 1.2 2.6
 -7 8 -13 0.3 4
 -8 8 -13 -1.7 2.5
 -8 8 -13 0.2 3.7
 -8 8 -13 -1.5 2
 -8 8 -13 1.9 2.8
 -9 8 -13 15.1 3.7
 -10 8 -13 49.1 5.7
 7 7 -13 -1.9 2.2
 6 7 -13 19.9 4
 -6 -7 13 2.9 4
 5 7 -13 9.9 3.2
 5 7 -13 11.5 4
 -5 -7 13 3.2 4.5
 4 7 -13 61.89 7.7
 4 7 -13 58.69 6.8
 3 7 -13 0.3 2.8
 3 7 -13 4.1 2.6
 -3 -7 13 5.1 3.6
 2 7 -13 80.49 7.6
 2 7 -13 80.69 8
 -2 -7 13 56.79 7.3
 1 7 -13 34.6 5.5
 1 7 -13 40.5 5.5
 0 7 -13 268.57 17.4
 0 7 -13 230.78 16.3
 0 7 -13 192.08 20.3
 -1 7 -13 94.29 7.6
 -1 7 -13 80.19 7.6
 -1 7 -13 92.19 8.2
 -2 7 -13 113.79 9.3
 -2 7 -13 92.59 8.5
 -2 7 -13 110.89 10.7
 -2 7 -13 114.49 8.7
 -2 7 -13 93.99 9
 -3 7 -13 1.4 1.9
 -3 7 -13 3.4 2.5
 -3 7 -13 3.5 4
 -3 7 -13 1.4 2
 -4 7 -13 55.29 5.4
 -4 7 -13 58.19 9.7
 -4 7 -13 37.8 5.5
 -4 7 -13 40.9 5.2
 -5 7 -13 12.1 2.9
 -5 7 -13 6.3 3.4
 -5 7 -13 7.4 2.4
 -5 7 -13 4.1 4.7
 -5 7 -13 6.5 2.8
 -6 7 -13 12.5 3
 -6 7 -13 6.4 2.9
 -6 7 -13 15.3 6.3
 -6 7 -13 9.5 3.4
 -7 7 -13 374.46 28.2
 -7 7 -13 271.77 22.9
 -7 7 -13 298.87 23.7
 -7 7 -13 322.77 22.7
 -8 7 -13 53.59 5.9
 -8 7 -13 52.19 7
 -9 7 -13 0.3 2.8
 -10 7 -13 86.79 8.2
 8 6 -13 86.89 7.6
 7 6 -13 3.1 2.7
 -7 -6 13 -3.5 3.3
 6 6 -13 37.5 4.8
 6 6 -13 34.9 5.5
 -6 -6 13 23.9 7
 5 6 -13 15.7 3.5
 5 6 -13 12.1 3.9
 -5 -6 13 5.4 5
 4 6 -13 20.2 3.7
 4 6 -13 19.2 4.4
 -4 -6 13 17.9 4.3
 3 6 -13 168.48 13.4
 3 6 -13 179.38 13.9
 -3 -6 13 147.49 13.4
 2 6 -13 318.17 23.9
 2 6 -13 322.67 23.7
 -2 -6 13 338.17 23.6
 1 6 -13 10.6 2.4
 1 6 -13 6.9 2.7
 1 6 -13 5.1 2.8
 -1 -6 13 9.6 4.4
 0 6 -13 18.8 3.6
 0 6 -13 15.7 2.8
 0 6 -13 21.9 6.1
 -1 6 -13 155.98 10.9
 -1 6 -13 124.39 14.4
 -1 6 -13 146.99 10.7
 -2 6 -13 24.8 6.5
 -2 6 -13 31.3 4.2
 -2 6 -13 26.6 3.7
 -2 6 -13 33.3 4
 -3 6 -13 504.65 41.6
 -3 6 -13 541.45 37.5
 -3 6 -13 553.74 37
 -3 6 -13 562.24 37.1
 -4 6 -13 7.9 2.4
 -4 6 -13 8.1 4.9
 -4 6 -13 5 2.7
 -4 6 -13 9.1 2.5
 -5 6 -13 106.79 10.8
 -5 6 -13 124.49 10.8
 -5 6 -13 130.49 10.4
 -5 6 -13 143.19 9.8
 -6 6 -13 2.5 2.5
 -6 6 -13 1.4 4
 -6 6 -13 0.4 2.1
 -6 6 -13 2.8 2.6
 -7 6 -13 1.9 1.9
 -7 6 -13 3.5 4.6
 -7 6 -13 6.1 3.1
 -8 6 -13 8.3 4.8
 -8 6 -13 3.3 2.3
 -8 6 -13 3.4 3
 -9 6 -13 79.39 8.4
 -10 6 -13 20.9 3.9
 8 5 -13 0.8 2.3
 -8 -5 13 1.7 3.4
 7 5 -13 30.3 4.8
 -7 -5 13 8.1 5.1
 6 5 -13 16.2 4.3
 6 5 -13 12.2 3.8
 -6 -5 13 13.8 5.9
 5 5 -13 65.29 7.9
 5 5 -13 66.69 6.8
 -5 -5 13 64.39 11.5
 4 5 -13 82.39 8.4
 4 5 -13 79.09 7.7
 -4 -5 13 87.09 8.6
 3 5 -13 1.5 2
 3 5 -13 -0.4 2.3
 -3 -5 13 0.1 2.4
 2 5 -13 10 3.3
 2 5 -13 11.3 3
 2 5 -13 12.6 2.4
 -2 -5 13 17 3.3
 1 5 -13 121.89 11.1
 1 5 -13 144.19 10.5
 1 5 -13 142.79 11.2
 -1 -5 13 148.99 11
 0 5 -13 90.39 7.3
 0 5 -13 90.19 10.9
 -1 5 -13 201.18 14.5
 -1 5 -13 199.78 18.6
 -2 5 -13 26.1 3.8
 -2 5 -13 23.1 3.2
 -2 5 -13 29.9 4.2
 -2 5 -13 15.2 2.4
 -3 5 -13 0.5 1.7
 -3 5 -13 3 2.1
 -3 5 -13 0.2 1.2
 -3 5 -13 -0.6 1.8
 -4 5 -13 68.79 6.4
 -4 5 -13 63.79 7
 -4 5 -13 71.09 6.3
 -4 5 -13 55.09 5.3
 -5 5 -13 65.99 6.6
 -5 5 -13 62.89 6.2
 -5 5 -13 74.79 6.9
 -5 5 -13 74.49 7.4
 -6 5 -13 79.49 7.2
 -6 5 -13 82.39 8.3
 -7 5 -13 264.27 19.6
 -7 5 -13 285.07 21.1
 -8 5 -13 0.8 2.8
 -8 5 -13 -0.2 3.8
 -9 5 -13 9.8 3.5
 -10 5 -13 13 3.3
 -8 -4 13 54.49 8.8
 7 4 -13 14.7 3.8
 -7 -4 13 2 4.4
 6 4 -13 75.79 8.2
 -6 -4 13 72.19 11.5
 5 4 -13 -2.6 2
 5 4 -13 2.4 2.9
 -5 -4 13 4.1 3
 -5 -4 13 1.3 4.3
 4 4 -13 80.39 8.8
 4 4 -13 96.19 7.9
 4 4 -13 85.79 8.1
 -4 -4 13 96.69 8.8
 3 4 -13 11.3 2.4
 3 4 -13 11.1 2.9
 2 4 -13 1546.55 103.39
 2 4 -13 1570.54 103.99
 -2 -4 13 1549.94 103.99
 1 4 -13 412.66 28.2
 1 4 -13 423.16 29
 -1 -4 13 433.86 29.4
 0 4 -13 3.7 0.8
 0 4 -13 2.7 3.4
 0 -4 13 6 1.9
 -1 4 -13 3.5 1.5
 -2 4 -13 236.88 16.5
 -2 4 -13 226.18 16.2
 -3 4 -13 214.98 14.5
 -3 4 -13 185.68 14.8
 -3 4 -13 197.48 14.8
 -4 4 -13 148.59 12.3
 -4 4 -13 180.88 12.5
 -4 4 -13 159.68 13.3
 -4 4 -13 163.68 12.6
 -5 4 -13 443.96 31.9
 -5 4 -13 479.75 32.7
 -5 4 -13 452.65 31.8
 -6 4 -13 55.09 5.8
 -6 4 -13 57.79 6.9
 -7 4 -13 37.4 5.8
 -8 4 -13 0.8 2.8
 -9 4 -13 5.3 3
 9 3 -13 12.5 3.1
 8 3 -13 -0.6 2.6
 -8 -3 13 1 3.8
 7 3 -13 96.99 9.3
 -7 -3 13 87.09 12.6
 6 3 -13 1.7 3.1
 -6 -3 13 0.5 4
 5 3 -13 75.49 6.7
 -5 -3 13 80.19 8.2
 -5 -3 13 76.99 11.2
 4 3 -13 -0.2 2.1
 4 3 -13 1.8 1.8
 -4 -3 13 2.4 3.6
 -4 -3 13 3.8 2.5
 3 3 -13 206.68 15.9
 3 3 -13 216.98 14.8
 3 3 -13 217.88 15.4
 -3 -3 13 216.48 16.4
 2 3 -13 484.95 33.1
 2 3 -13 477.55 32.1
 2 3 -13 473.05 32.8
 -2 -3 13 486.55 33.4
 1 3 -13 126.49 8.8
 -1 -3 13 123.29 9.9
 0 3 -13 46 3.6
 0 3 -13 44.8 4.7
 0 -3 13 50.49 4.8
 -1 3 -13 671.03 44.7
 -1 3 -13 646.24 43.8
 1 -3 13 670.53 44.7
 -2 3 -13 256.47 17.2
 -2 3 -13 228.38 16.1
 -3 3 -13 0.1 0.6
 -3 3 -13 0.1 2
 -3 3 -13 1.2 1.6
 -4 3 -13 10 2.7
 -4 3 -13 7.8 2.5
 -4 3 -13 6 2.7
 -5 3 -13 343.17 26.2
 -5 3 -13 350.36 25.4
 -5 3 -13 391.26 26.1
 -6 3 -13 4.3 2.7
 -7 3 -13 0.6 2.6
 -8 3 -13 5.4 3
 -9 3 -13 0.2 2.4
 -10 3 -13 2.2 2.2
 9 2 -13 43.2 5.4
 -9 -2 13 41.2 7.5
 8 2 -13 17.8 4.1
 -8 -2 13 26.9 7.2
 7 2 -13 -1.2 2.9
 -7 -2 13 2 3.9
 6 2 -13 2.2 1.8
 -6 -2 13 0.6 2.6
 -6 -2 13 1.8 4
 5 2 -13 200.18 14.4
 -5 -2 13 192.48 15.7
 -5 -2 13 199.48 19.1
 4 2 -13 11.9 2.5
 4 2 -13 9.9 1.9
 -4 -2 13 11.5 3.2
 -4 -2 13 9.6 4.5
 3 2 -13 10.2 2.2
 3 2 -13 9.8 2.1
 3 2 -13 8.5 1.6
 -3 -2 13 5.1 3.4
 -3 -2 13 4.6 2.5
 2 2 -13 1012.5 66.09
 -2 -2 13 981.4 67.19
 1 2 -13 414.66 28.9
 -1 -2 13 449.26 30
 0 2 -13 0.6 1.3
 0 -2 13 4.8 1.9
 -1 2 -13 246.68 16.6
 -1 2 -13 223.78 15.7
 1 -2 13 220.78 16.4
 -2 2 -13 53.39 5.3
 -2 2 -13 58.09 4.2
 2 -2 13 53.69 5.2
 -3 2 -13 9.4 2.6
 3 -2 13 17 2.9
 -4 2 -13 262.47 19
 -4 2 -13 250.47 18.2
 -4 2 -13 251.97 18.8
 4 -2 13 246.68 18.5
 -5 2 -13 38 5.4
 -5 2 -13 44.3 5.6
 5 -2 13 41.8 5.6
 -6 2 -13 1.9 2.4
 6 -2 13 3.6 3.1
 -7 2 -13 278.97 21
 -8 2 -13 178.78 14.5
 -9 2 -13 7.4 2.9
 -10 2 -13 5.4 2.4
 9 1 -13 4 2.7
 -9 -1 13 0.2 3.3
 8 1 -13 2.3 3
 -8 -1 13 0.3 3.7
 -7 -1 13 64.79 10.5
 -6 -1 13 16 5.9
 -6 -1 13 22.6 4.6
 5 1 -13 104.19 8.5
 5 1 -13 98.89 7.8
 -5 -1 13 101.39 12.3
 -5 -1 13 102.59 9.5
 4 1 -13 293.87 20.3
 4 1 -13 276.87 19.7
 -4 -1 13 289.87 24
 3 1 -13 779.72 51.19
 3 1 -13 838.52 51.69
 -3 -1 13 670.63 54.39
 -3 -1 13 786.92 52.49
 2 1 -13 673.83 44.3
 -2 -1 13 638.84 47.5
 -2 -1 13 680.03 45.5
 1 1 -13 102.39 8.3
 -1 -1 13 92.39 8.2
 0 1 -13 2.7 1.6
 0 -1 13 3 1.7
 -1 1 -13 294.97 20
 -1 1 -13 294.87 20.9
 1 -1 13 291.57 20.8
 -2 1 -13 526.05 36.4
 2 -1 13 528.45 36.3
 -3 1 -13 190.28 14.9
 -3 1 -13 192.68 14.7
 3 -1 13 191.38 14.6
 -4 1 -13 11 2.1
 -4 1 -13 7.2 2.8
 -4 1 -13 14.2 3.4
 4 -1 13 13.1 3.3
 -5 1 -13 40.9 4.5
 -5 1 -13 35.2 5.4
 -5 1 -13 53.89 6.2
 5 -1 13 48.5 6.2
 -6 1 -13 1.1 2.3
 6 -1 13 1.8 3.1
 -7 1 -13 0.6 2.6
 -8 1 -13 133.49 11.5
 -9 1 -13 112.39 9.6
 10 0 -13 11.1 3.8
 9 0 -13 1.1 2.6
 -9 0 13 1.3 3.5
 -8 0 13 7 4.7
 -7 0 13 78.19 11.4
 6 0 -13 128.49 9.5
 -6 0 13 114.19 13.7
 -6 0 13 96.39 10.1
 5 0 -13 0.9 1.8
 5 0 -13 2.9 2.1
 -5 0 13 0.8 2.4
 -5 0 13 2.8 3.7
 4 0 -13 14.2 2.2
 4 0 -13 17 2.8
 -4 0 13 5 3.9
 -4 0 13 7.8 2.8
 3 0 -13 117.19 9
 3 0 -13 104.79 9.4
 -3 0 13 147.79 13
 -3 0 13 121.49 10.1
 -2 0 13 461.75 32.2
 1 0 -13 2153.08 143.49
 -1 0 13 2159.28 143.29
 0 0 -13 62.89 6.1
 0 0 13 70.99 6.3
 -1 0 -13 1.3 1.7
 1 0 13 0.9 1.8
 -2 0 -13 80.29 7.5
 2 0 13 85.99 7.7
 -3 0 -13 1.3 1.7
 -3 0 -13 -1.1 2.1
 -3 0 -13 1.1 2.1
 3 0 13 2.2 2.1
 -4 0 -13 154.98 12
 -4 0 -13 136.19 10.6
 -4 0 -13 122.29 11.4
 4 0 13 143.19 11.9
 -5 0 -13 350.06 23.9
 -5 0 -13 349.87 25.1
 5 0 13 324.47 25.1
 -6 0 -13 56.39 6.6
 -6 0 -13 54.59 5.5
 6 0 13 42 6.4
 -7 0 -13 17.5 4.1
 -7 0 -13 18.9 3
 -8 0 -13 64.29 7
 -9 0 -13 108.99 9.3
 10 -1 -13 0.8 2.2
 -10 1 13 0.8 1.7
 -10 1 13 1.8 3
 9 -1 -13 -0.6 2.6
 -9 1 13 -1.6 1.8
 -9 1 13 2.2 3.4
 -8 1 13 62.99 10
 -7 1 13 6.8 4.8
 -7 1 13 11.5 3.7
 6 -1 -13 7.7 2.4
 -6 1 13 4.4 2.8
 -6 1 13 1.8 3.7
 5 -1 -13 13.3 2.8
 -5 1 13 15.9 5.3
 4 -1 -13 189.28 14.2
 -4 1 13 197.68 17.6
 -4 1 13 185.78 15
 3 -1 -13 576.14 41.9
 3 -1 -13 597.04 42.4
 -3 1 13 685.53 45.8
 -3 1 13 640.04 43.3
 -2 1 13 0.7 1.9
 -1 1 13 2.8 2
 0 -1 -13 28.7 4.1
 0 1 13 32.1 4.4
 -1 -1 -13 3.9 2.2
 1 1 13 4.5 2.4
 -2 -1 -13 10.1 2.3
 -2 -1 -13 13.9 3.1
 -2 -1 -13 12.2 3.6
 2 1 13 14.7 3.5
 -3 -1 -13 105.19 9.9
 -3 -1 -13 119.69 9.2
 3 1 13 117.59 10.2
 -4 -1 -13 12.9 2.9
 -4 -1 -13 16.9 3.7
 4 1 13 14.9 3.8
 -5 -1 -13 17.6 3.4
 -5 -1 -13 20.4 4.3
 5 1 13 22.1 4.5
 -6 -1 -13 1.7 2.8
 -6 -1 -13 -0.8 2.3
 -7 -1 -13 18.5 4.3
 -7 -1 -13 20.3 3.6
 -8 -1 -13 21 3.1
 -8 -1 -13 16.5 3.9
 10 -2 -13 28.3 4.2
 -10 2 13 31 3.6
 -10 2 13 28.4 6.2
 -9 2 13 132.29 10.3
 -9 2 13 133.49 14
 -8 2 13 106.19 12.4
 -8 2 13 91.69 8.3
 7 -2 -13 139.19 10.7
 -7 2 13 130.09 11.8
 -7 2 13 123.29 14.4
 6 -2 -13 286.07 20.1
 -6 2 13 270.67 23.9
 -6 2 13 271.77 21
 5 -2 -13 106.29 8.9
 -5 2 13 108.09 10.1
 -5 2 13 109.99 12.3
 4 -2 -13 441.26 30.2
 -4 2 13 436.56 31
 -4 2 13 426.56 33.3
 3 -2 -13 49.6 4.8
 -3 2 13 34.9 6.5
 -3 2 13 37.6 5.2
 -2 2 13 43.2 5.3
 -1 2 13 31.4 4.5
 0 2 13 0.6 2
 -1 -2 -13 1.4 1.7
 1 2 13 -0.3 2.1
 -2 -2 -13 43.9 4.9
 -2 -2 -13 43.4 6.1
 2 2 13 43.1 5.8
 -3 -2 -13 13.8 3.7
 -3 -2 -13 7.6 2.5
 3 2 13 13.8 3.7
 -4 -2 -13 9.3 3.4
 -4 -2 -13 8.9 2.8
 4 2 13 6.2 3.3
 -5 -2 -13 75.39 7.6
 -5 -2 -13 85.19 8.6
 5 2 13 77.99 8.5
 -6 -2 -13 326.97 23.8
 -6 -2 -13 306.67 22.7
 -7 -2 -13 0.2 2.4
 -7 -2 -13 6.6 3.4
 -8 -2 -13 1 2.1
 10 -3 -13 40.1 5.3
 -10 3 13 46.9 4.6
 -10 3 13 47.2 7.3
 -9 3 13 1.3 1.8
 -9 3 13 0.2 3.2
 -8 3 13 11.2 4.9
 -8 3 13 11.9 2.7
 7 -3 -13 37.2 4.8
 -7 3 13 38.6 6.2
 -7 3 13 48.4 8.5
 -7 3 13 38.8 4.8
 6 -3 -13 240.48 17.2
 -6 3 13 238.28 21.2
 -6 3 13 219.38 18.4
 5 -3 -13 671.23 45.6
 -5 3 13 668.63 46.6
 -5 3 13 661.23 49.2
 4 -3 -13 29.7 4.2
 -4 3 13 36.7 5.3
 -4 3 13 32.9 6.6
 3 -3 -13 59.59 5.5
 -3 3 13 49.4 6.2
 2 -3 -13 0.8 1.7
 2 -3 -13 1.8 3.7
 -2 3 13 0.2 2.1
 1 -3 -13 521.45 35.9
 -1 3 13 528.65 36.9
 0 -3 -13 2.4 2
 0 -3 -13 3.7 3.2
 0 3 13 1.6 2.3
 -1 -3 -13 59.89 6.1
 -1 -3 -13 64.89 7.5
 1 3 13 65.39 7.2
 -2 -3 -13 310.67 22.4
 -2 -3 -13 303.57 23.5
 2 3 13 328.57 23.5
 -3 -3 -13 3.7 2.4
 -3 -3 -13 5.6 3.2
 3 3 13 3.3 3.1
 -4 -3 -13 11.5 3.9
 -4 -3 -13 8.3 2.9
 4 3 13 11 3.5
 -5 -3 -13 55.69 7.3
 -5 -3 -13 50.09 6.1
 -6 -3 -13 24 5.7
 -6 -3 -13 28.8 4.2
 -7 -3 -13 17.4 3.3
 -8 -3 -13 35.4 3.8
 -10 4 13 105.39 8.4
 -10 4 13 106.69 11.3
 -9 4 13 85.99 10.9
 -9 4 13 92.59 7.7
 8 -4 -13 72.19 6.6
 -8 4 13 68.59 6.4
 -8 4 13 54.09 9.4
 7 -4 -13 150.58 12.6
 -7 4 13 175.48 16.7
 -7 4 13 153.78 12.4
 6 -4 -13 9.9 2.4
 -6 4 13 7.7 2.4
 -6 4 13 14.8 5.4
 5 -4 -13 3.2 2
 -5 4 13 3 2.9
 -5 4 13 4.1 3.8
 4 -4 -13 212.18 14.1
 -4 4 13 189.28 15
 -4 4 13 159.28 16.2
 3 -4 -13 8.4 2.5
 -3 4 13 8.3 3.2
 2 -4 -13 133.19 10.3
 -2 4 13 124.69 11.2
 1 -4 -13 10.5 4.4
 1 -4 -13 10.3 2.6
 -1 4 13 15 3.7
 0 -4 -13 31.7 4.1
 0 -4 -13 40.7 6.6
 0 4 13 27.1 4.9
 -1 -4 -13 154.38 13.6
 -1 -4 -13 142.59 12.1
 1 4 13 167.68 13.4
 -2 -4 -13 236.58 18.3
 -2 -4 -13 250.07 19.7
 2 4 13 252.47 19.2
 -3 -4 -13 25 5.2
 -3 -4 -13 26.3 4.2
 3 4 13 19.6 4.8
 -4 -4 -13 174.68 13.5
 -4 -4 -13 176.98 14.7
 4 4 13 157.28 14.2
 -5 -4 -13 33.7 4.7
 -6 -4 -13 3.4 2.5
 -7 -4 -13 9.2 2.5
 -10 5 13 109.69 8.2
 -10 5 13 97.79 10.8
 -9 5 13 195.38 17.9
 -9 5 13 187.98 14.2
 8 -5 -13 44.9 5.5
 -8 5 13 57.69 9
 -8 5 13 47.9 5.2
 7 -5 -13 28.8 4.2
 -7 5 13 18.5 6
 -7 5 13 21 3.4
 6 -5 -13 61.19 6.3
 -6 5 13 52.89 8.8
 -6 5 13 59.09 6
 5 -5 -13 208.68 15.9
 -5 5 13 210.58 17.1
 -5 5 13 214.48 19.1
 4 -5 -13 127.39 10.2
 -4 5 13 120.69 11.2
 -4 5 13 121.39 12.7
 3 -5 -13 77.29 7.3
 -3 5 13 78.29 8.3
 2 -5 -13 757.72 51.39
 -2 5 13 749.92 52.29
 1 -5 -13 64.89 8.6
 1 -5 -13 62.49 6.3
 -1 5 13 47.7 6.6
 0 -5 -13 27.5 4.3
 0 -5 -13 33.8 6.3
 0 5 13 24.2 4.7
 -1 -5 -13 6.6 4.4
 -1 -5 -13 6.8 2.7
 1 5 13 5.8 3.3
 -2 -5 -13 39.5 6.9
 -2 -5 -13 37.3 5
 2 5 13 39.1 6
 -3 -5 -13 30.1 4.7
 -3 -5 -13 33.6 6.3
 3 5 13 29.4 5.3
 -4 -5 -13 17 3.6
 -5 -5 -13 429.06 30.1
 -6 -5 -13 71.99 6.5
 6 5 13 63.49 5.7
 -7 -5 -13 8.6 2.3
 -10 6 13 0.9 2.3
 -10 6 13 0.3 3.1
 -10 6 13 0.5 1.5
 -9 6 13 3.9 2
 -9 6 13 3 3.6
 8 -6 -13 62.79 6.8
 -8 6 13 70.69 9.9
 -8 6 13 72.29 6.6
 7 -6 -13 4.2 2.6
 -7 6 13 7.6 2.3
 -7 6 13 7.1 4.7
 -7 6 13 4.3 3.9
 6 -6 -13 99.79 9.9
 -6 6 13 139.89 13.6
 -6 6 13 109.79 12.5
 5 -6 -13 135.59 12.1
 5 -6 -13 148.29 13
 -5 6 13 170.88 15.5
 4 -6 -13 105.19 10.3
 4 -6 -13 115.49 9.5
 -4 6 13 106.59 10.5
 3 -6 -13 105.99 8.9
 -3 6 13 94.89 9.7
 2 -6 -13 78.39 8
 -2 6 13 93.19 9
 1 -6 -13 260.57 21
 -1 6 13 309.97 22.2
 -1 6 13 296.37 20.5
 0 -6 -13 7.7 3.1
 0 -6 -13 8.5 4.7
 0 6 13 11.4 3.8
 -1 -6 -13 9.6 4.8
 -1 -6 -13 11 3.2
 1 6 13 10.9 3.7
 -2 -6 -13 10 2.9
 -2 -6 -13 6 4.4
 2 6 13 3.4 3.2
 -3 -6 -13 45.1 5.7
 -4 -6 -13 63.79 6.5
 4 6 13 56.59 5.8
 -5 -6 -13 40 4.7
 5 6 13 37.1 4.1
 -6 -6 -13 12.2 2.7
 6 6 13 11.5 2.1
 -10 7 13 193.28 13.5
 -10 7 13 199.28 16.8
 -10 7 13 167.18 14.2
 -9 7 13 23.1 3.3
 -9 7 13 19 5.5
 -8 7 13 47.3 8.5
 -8 7 13 43.3 5.2
 7 -7 -13 329.87 24.6
 -7 7 13 335.07 28.4
 -7 7 13 350.56 27.3
 -7 7 13 360.76 24.6
 6 -7 -13 2.6 2.7
 -6 7 13 3.3 4.1
 -6 7 13 5.8 4.4
 5 -7 -13 105.29 9.7
 5 -7 -13 108.89 10.6
 -5 7 13 118.69 12.7
 -5 7 13 115.49 12.8
 4 -7 -13 80.09 8.3
 4 -7 -13 71.19 7.4
 -4 7 13 65.09 10
 3 -7 -13 6.6 2.5
 -3 7 13 9 3.7
 2 -7 -13 27.8 4.5
 -2 7 13 23.2 4.8
 -2 7 13 32.2 3.7
 1 -7 -13 43.3 5.6
 -1 7 13 38.6 6
 -1 7 13 44.1 4.6
 0 -7 -13 304.27 21.7
 0 7 13 296.37 22.4
 0 7 13 302.67 21
 0 7 13 276.37 23.7
 -1 -7 -13 14.4 3.8
 1 7 13 15.4 3.1
 1 7 13 14.8 4.2
 -2 -7 -13 131.59 10.9
 2 7 13 127.69 10.3
 -3 -7 -13 4 2.7
 3 7 13 8.6 2.3
 -4 -7 -13 1.3 2.4
 4 7 13 6.1 1.9
 -5 -7 -13 2.1 2.1
 5 7 13 0.6 1.4
 -6 -7 -13 26.9 3.2
 -10 8 13 7.4 2.7
 -10 8 13 8.1 1.9
 -9 8 13 19.6 5.3
 -9 8 13 18.6 3
 -8 8 13 34.1 4.4
 -7 8 13 100.09 8.4
 -7 8 13 72.39 11
 -7 8 13 117.29 11.4
 -6 8 13 304.37 26.1
 -6 8 13 347.67 27.2
 5 -8 -13 1.3 2.2
 -5 8 13 -0.2 4.1
 -5 8 13 -1.5 3.4
 4 -8 -13 2 3.6
 4 -8 -13 0 2.2
 -4 8 13 -0.3 4.1
 3 -8 -13 141.09 11.7
 -3 8 13 137.79 14.7
 2 -8 -13 25.8 4.3
 -2 8 13 30.3 3.7
 -2 8 13 26.7 6.8
 1 -8 -13 61.59 6.8
 -1 8 13 62.19 9.7
 -1 8 13 63.59 5.8
 0 -8 -13 75.19 7.7
 0 8 13 71.89 6.5
 -1 -8 -13 5.3 2.8
 1 8 13 5 2.1
 -2 -8 -13 0 2.6
 2 8 13 2 1.7
 -3 -8 -13 3.4 2.4
 3 8 13 1.8 1.7
 -4 -8 -13 2.8 2.2
 4 8 13 0.8 1.4
 -5 -8 -13 77.59 6.4
 5 8 13 70.89 5.8
 -10 9 13 126.19 9
 -10 9 13 117.39 9.8
 -9 9 13 -1 1.6
 -9 9 13 1.2 4.3
 -8 9 13 -0.7 3.4
 -8 9 13 -1 1.8
 -8 9 13 0.7 3.4
 -7 9 13 247.48 18.3
 -7 9 13 255.37 20.8
 -7 9 13 248.48 22
 -6 9 13 6 4.2
 -6 9 13 6.8 4.6
 -5 9 13 13 5.4
 4 -9 -13 1.9 2.3
 -4 9 13 0.8 4
 3 -9 -13 7.9 3
 -3 9 13 6.3 4.7
 2 -9 -13 134.49 10.9
 -2 9 13 116.59 13
 -2 9 13 125.89 9.7
 1 -9 -13 53.39 6
 -1 9 13 30.5 7.1
 -1 9 13 46.1 4.7
 0 -9 -13 113.19 9.7
 0 9 13 105.09 8.7
 -1 -9 -13 3.7 2.6
 1 9 13 4.9 2
 -2 -9 -13 11.9 3
 2 9 13 19.1 2.9
 -3 -9 -13 -2.9 1.9
 3 9 13 1.3 1.6
 -4 -9 -13 0.2 1.8
 4 9 13 1.5 1.3
 -9 10 13 3.3 1.5
 -8 10 13 22.2 3.1
 -8 10 13 17.2 4.5
 -7 10 13 0.6 3.7
 -7 10 13 -1.5 1.9
 -7 10 13 1.8 3.5
 -6 10 13 60.59 8.6
 -6 10 13 54.29 9.9
 -5 10 13 125.39 13
 -4 10 13 76.69 10.2
 -3 10 13 59.49 5.6
 -3 10 13 60.09 9
 2 -10 -13 25.9 4.4
 -2 10 13 24.3 3.5
 -2 10 13 23.4 5.9
 1 -10 -13 87.09 8.3
 -1 10 13 95.59 7.5
 -1 10 13 82.29 10
 0 -10 -13 104.59 8.8
 0 10 13 95.69 8
 -1 -10 -13 26 3.8
 1 10 13 19.7 3
 -2 -10 -13 5 2.4
 2 10 13 5 1.8
 -3 -10 -13 9 2.2
 3 10 13 6.2 1.6
 -8 11 13 0.1 2.8
 -8 11 13 1 1.5
 -7 11 13 34 5.9
 -7 11 13 37.5 4
 -6 11 13 36 6.7
 -5 11 13 0.9 3.7
 -4 11 13 7.3 4.4
 -3 11 13 3.5 1.9
 -3 11 13 2.3 3.8
 -2 11 13 13.7 2.5
 -2 11 13 10.5 4.5
 1 -11 -13 12.9 3
 -1 11 13 8.5 2.3
 0 -11 -13 59.49 6.3
 0 11 13 68.79 5.8
 -1 -11 -13 6.8 2.5
 1 11 13 5.6 1.9
 -7 12 13 120.59 8.4
 -7 12 13 104.39 10.2
 -6 12 13 31.2 3.4
 -6 12 13 27.6 5.4
 -5 12 13 20.7 4.9
 -4 12 13 -0.2 3
 -3 12 13 2.1 1.7
 -3 12 13 4 3.2
 -2 12 13 1.3 1.6
 -1 12 13 13 2.2
 0 12 13 32.8 3.4
 -5 13 13 1.1 1.4
 -5 13 13 3 2.8
 -4 13 13 -0.9 2.4
 -3 14 -14 2.5 1.8
 -4 14 -14 1.9 1.7
 -5 14 -14 7.8 2.1
 1 13 -14 0.7 1.7
 0 13 -14 12.3 2.7
 -1 13 -14 170.88 13.1
 -1 13 -14 152.28 12.2
 -3 13 -14 58.69 5.8
 -4 13 -14 2.9 2.2
 -5 13 -14 1.3 2.1
 -6 13 -14 2.8 2.2
 2 12 -14 39.1 4.8
 2 12 -14 47.5 5.5
 1 12 -14 -2.7 2.7
 1 12 -14 -1 2
 0 12 -14 1.2 2.1
 -1 12 -14 -0.3 3.1
 -1 12 -14 1 2.1
 -2 12 -14 0.4 2
 -2 12 -14 1.5 2.5
 -3 12 -14 0.3 2.4
 -4 12 -14 16.5 3.5
 -4 12 -14 10.1 2.4
 -5 12 -14 79.79 7
 -5 12 -14 89.29 7.8
 -6 12 -14 99.99 8
 -6 12 -14 83.29 7.2
[truncated: 118,192 more chars]
